# Supplementary material for: Identifying therapeutic targets for breast cancer: insights from systematic Mendelian randomization analysis
Source: Frontiers journal article supplement (doi:10.3389/fonc.2024.1407795), 2024-06-03
Supplement: Image_1.PDF [file Image_1.PDF]

## ***Supplementary Material***

### **Identifying Therapeutic Targets for Breast Cancer: Insights from Systematic Mendelian Randomization Analysis**

**Tao Yao <sup>1†</sup>, Yun-Lu Lin <sup>1†</sup>, Yu-Qing Wu <sup>1</sup>, Xin-Ge Qian <sup>1</sup>, Zhe-Ning Wang <sup>1</sup>, Sang Qian <sup>1</sup>, Ting Jiang <sup>1</sup>, Jing-Chen Liu <sup>1</sup>, Luo-Xiang Fang <sup>1</sup>, Cheng Zhen <sup>1</sup>, and Chun-Hui Wu <sup>2\*</sup>**

<sup>1</sup>The Second Affiliated Hospital and Yuying Children's Hospital of Wenzhou Medical University, Wenzhou 325000, Zhejiang, China

<sup>2</sup>Children's Heart Center, The Second Affiliated Hospital and Yuying Children's Hospital, Institute of Cardiovascular Development and Translational Medicine, Wenzhou Medical University, Wenzhou, 325027, Zhejiang, China

**†These authors contributed equally to this work and share first authorship**

**\* Correspondence:**

Chun-Hui Wu

19817585212@163.com

### **Supplementary Figures**

**Figure S1 Bidirectional MR analysis for breast cancer on levels of prioritized proteins**

**Figure S2 Bayesian colocalization analysis for TLR1 and BC\_overall**

**Figure S3 Bayesian colocalization analysis for PDCD6 and BC\_overall**

**Figure S4 Bayesian colocalization analysis for RCL and BC\_overall**

**Figure S5 Bayesian colocalization analysis for A4GALT and BC\_overall**

**Figure S6 Bayesian colocalization analysis for PARK7 and BC\_overall**

**Figure S7 Bayesian colocalization analysis for SNUPN and BC\_overall**

**Figure S8 Bayesian colocalization analysis for CTSF and BC\_overall**

**Figure S9 Bayesian colocalization analysis for SEMA4A and BC\_overall**

**Figure S10 Bayesian colocalization analysis for LAYN and BC\_overall**

**Figure S11 Bayesian colocalization analysis for HAPLN4 and BC\_overall**

**Figure S12 Bayesian colocalization analysis for TLR1 and BC\_ER(+)**

**Figure S13 Bayesian colocalization analysis for GDI2 and BC\_ER(+)**

**Figure S14 Bayesian colocalization analysis for MST1 and BC\_ER(-)**

**Figure S15 Bayesian colocalization analysis for GPX1 and BC\_ER(-)**

**Figure S16 Bayesian colocalization analysis for KDELC2 and BC\_ER(-)**

**Figure S17 Protein-protein interaction network between suggestive BC\_overall-related proteins ( $P < 0.05$ ) from plasma**

**Figure S18 Protein-protein interaction network between suggestive BC\_ER(+)-related proteins ( $P < 0.05$ ) from plasma**

**Figure S19 Protein-protein interaction network between suggestive BC\_ER(-)-related proteins ( $P < 0.05$ ) from plasma**

**Figure S20 Replication of causal relationship between prioritized proteins and breast cancer**

**Figure S21 The mRNA expression profile of TLR1 across human tissues (The human protein atlas, <https://www.proteinatlas.org/>).**

**Figure S22 The mRNA expression profile of A4GALT across human tissues (The human protein atlas, <https://www.proteinatlas.org/>).**

**Figure S23 The mRNA expression profile of SNUPN across human tissues (The human protein atlas, <https://www.proteinatlas.org/>).**

**Figure S24 The mRNA expression profile of CTSF across human tissues (The human protein atlas, <https://www.proteinatlas.org/>).**

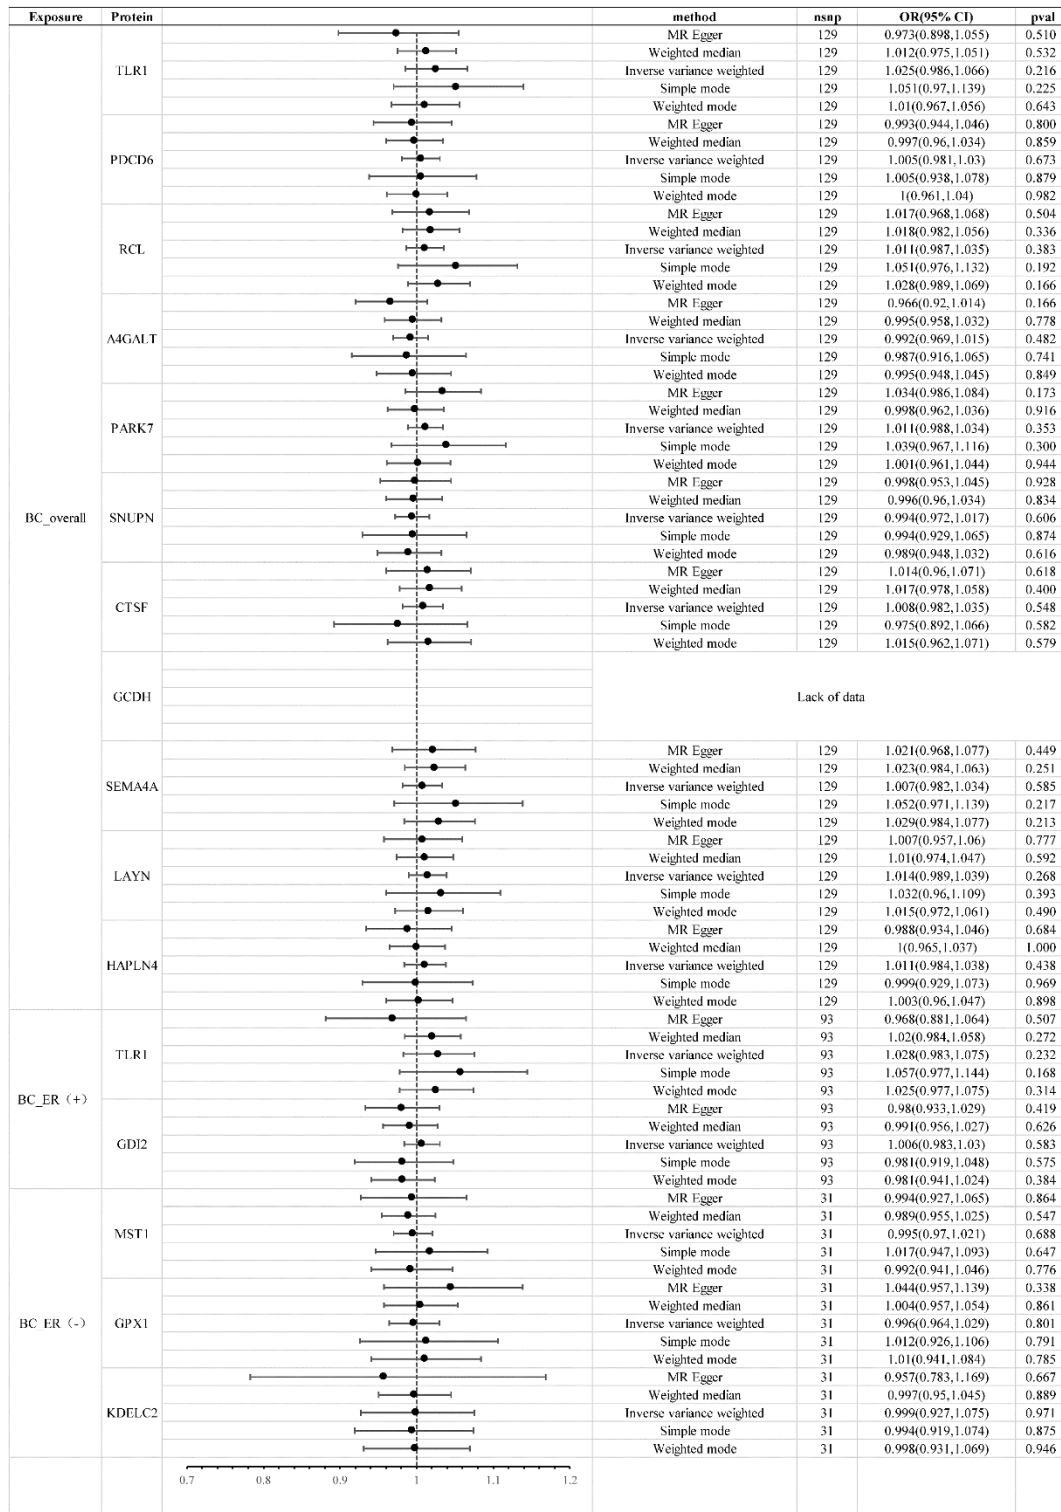

**Figure S1 Bidirectional MR analysis for breast cancer on levels of prioritized proteins**

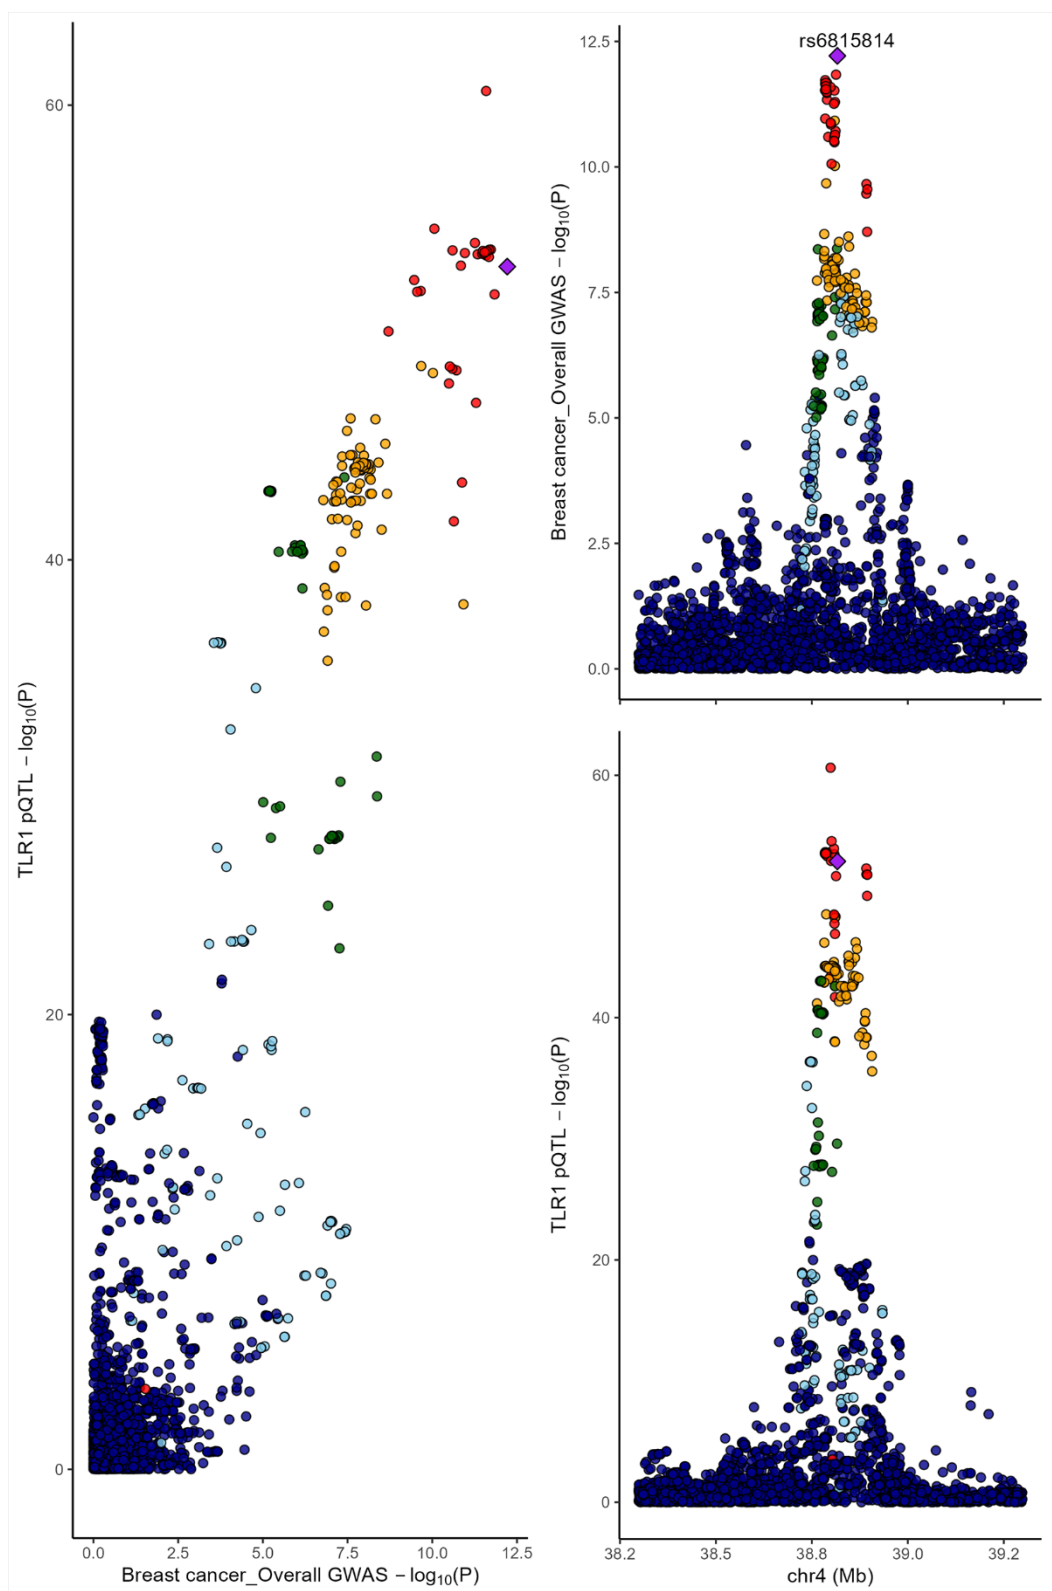

**Figure S2 Bayesian colocalization analysis for TLR1 and BC\_overall**



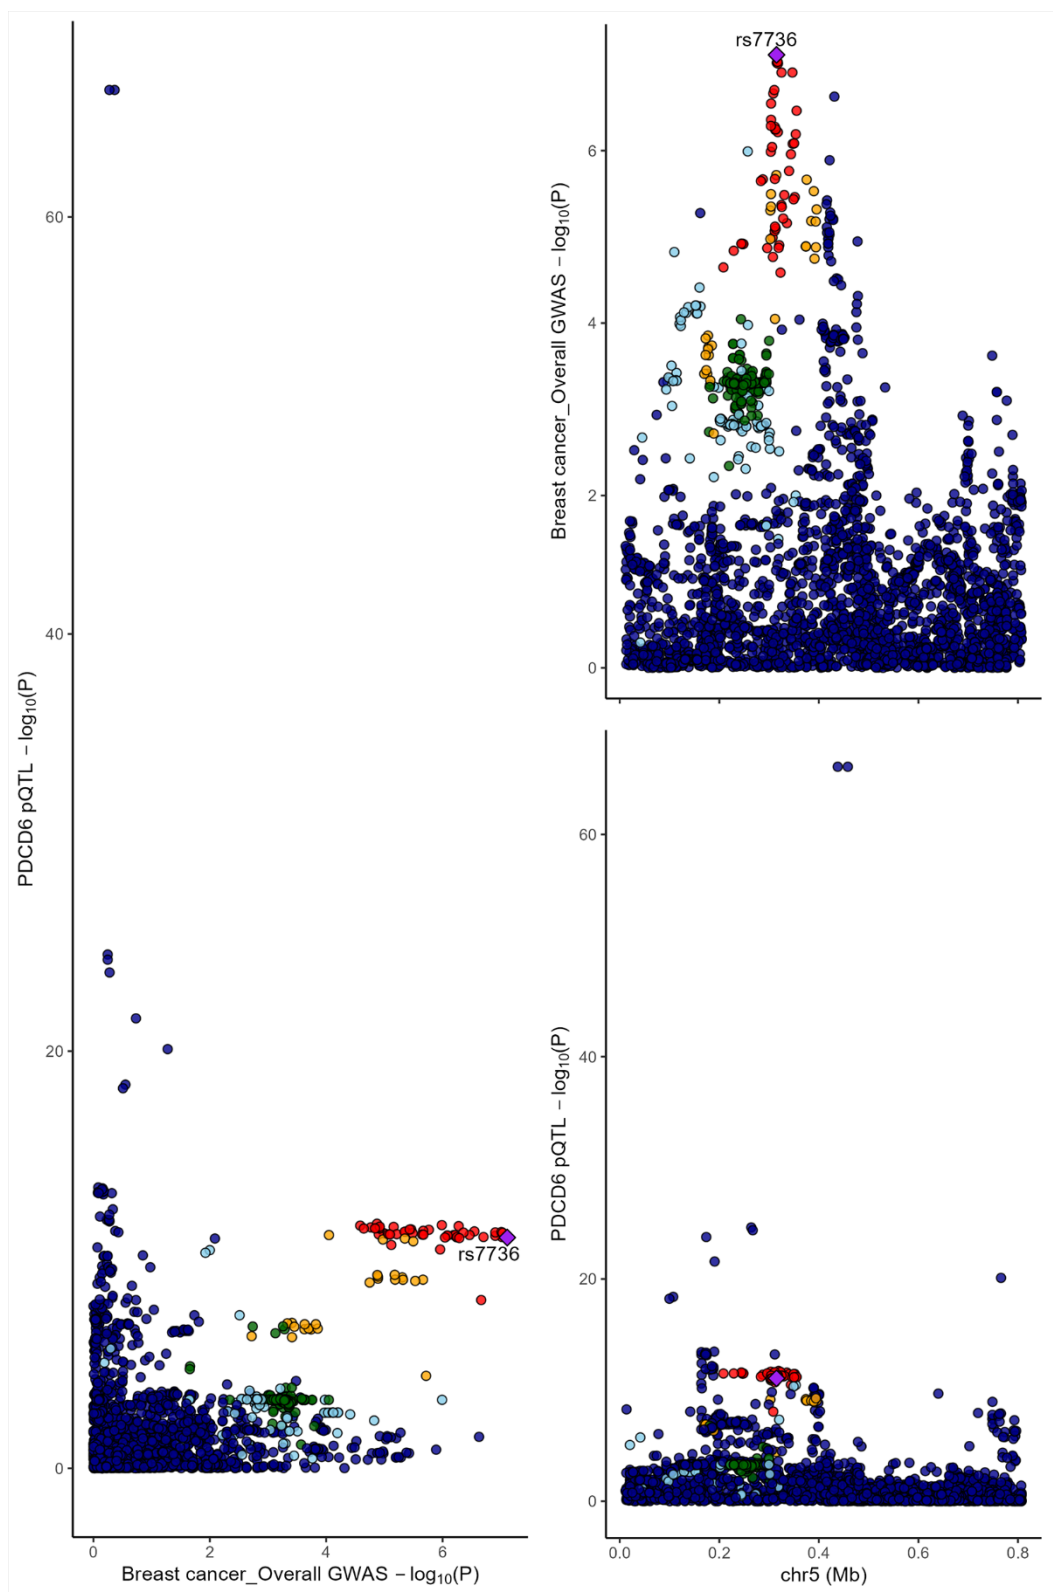

**Figure S3 Bayesian colocalization analysis for PDCD6 and BC\_overall**

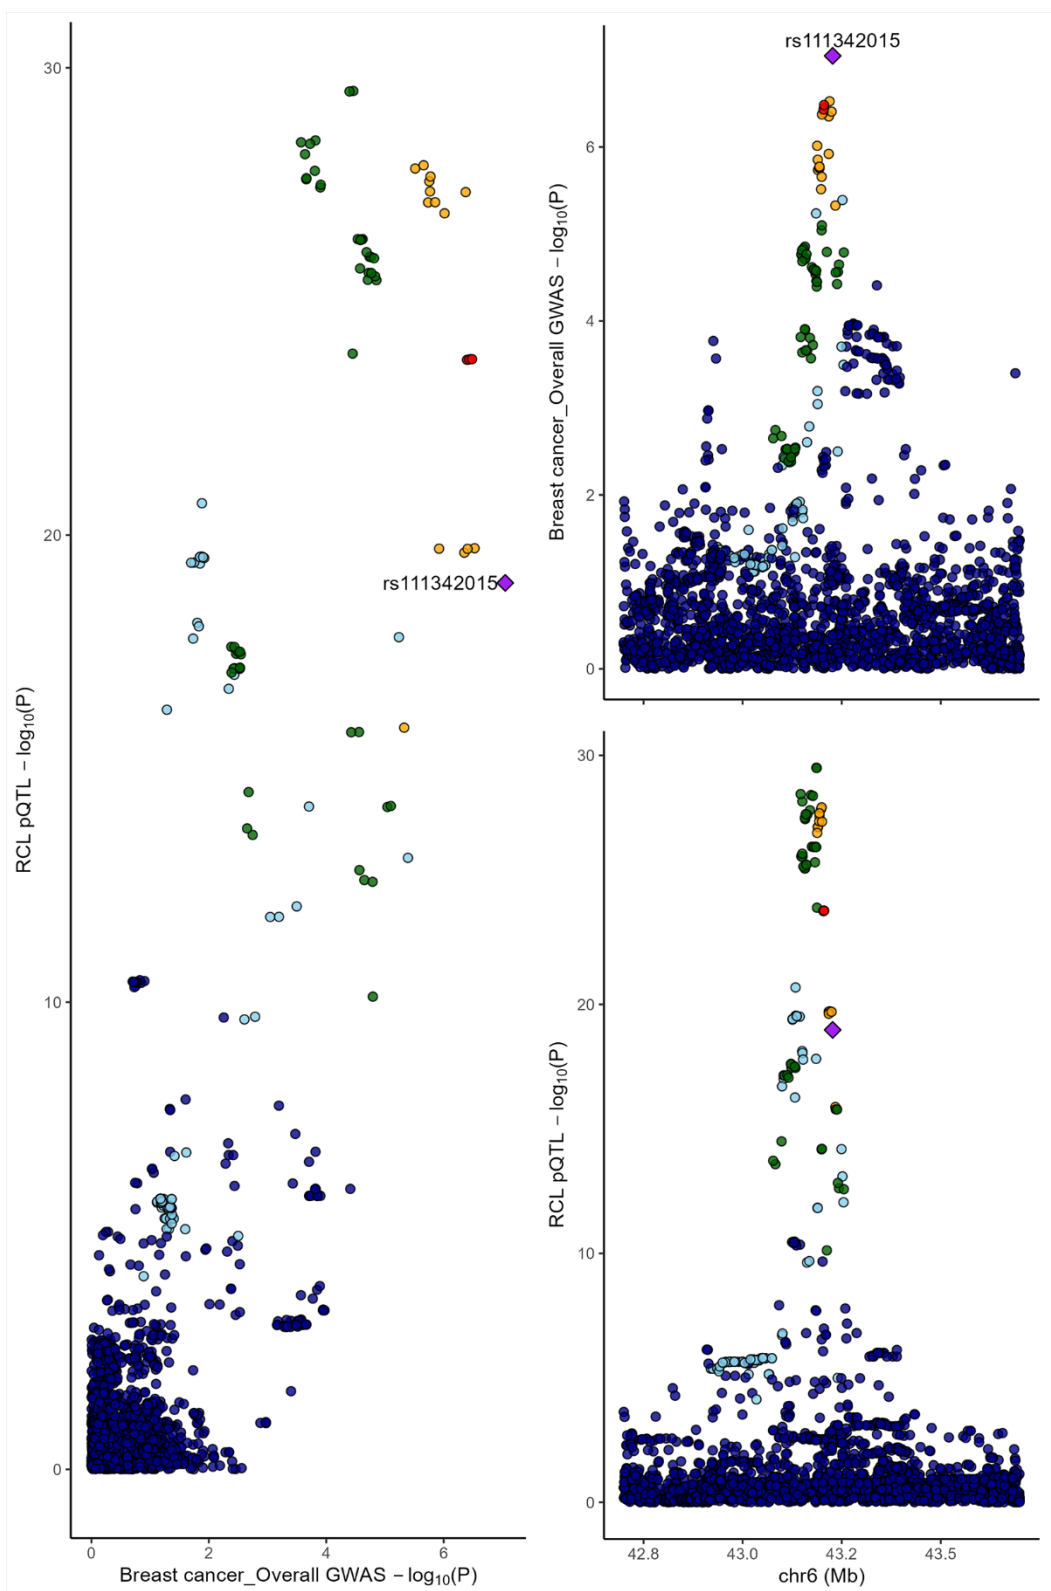

**Figure S4 Bayesian colocalization analysis for RCL and BC\_overall**

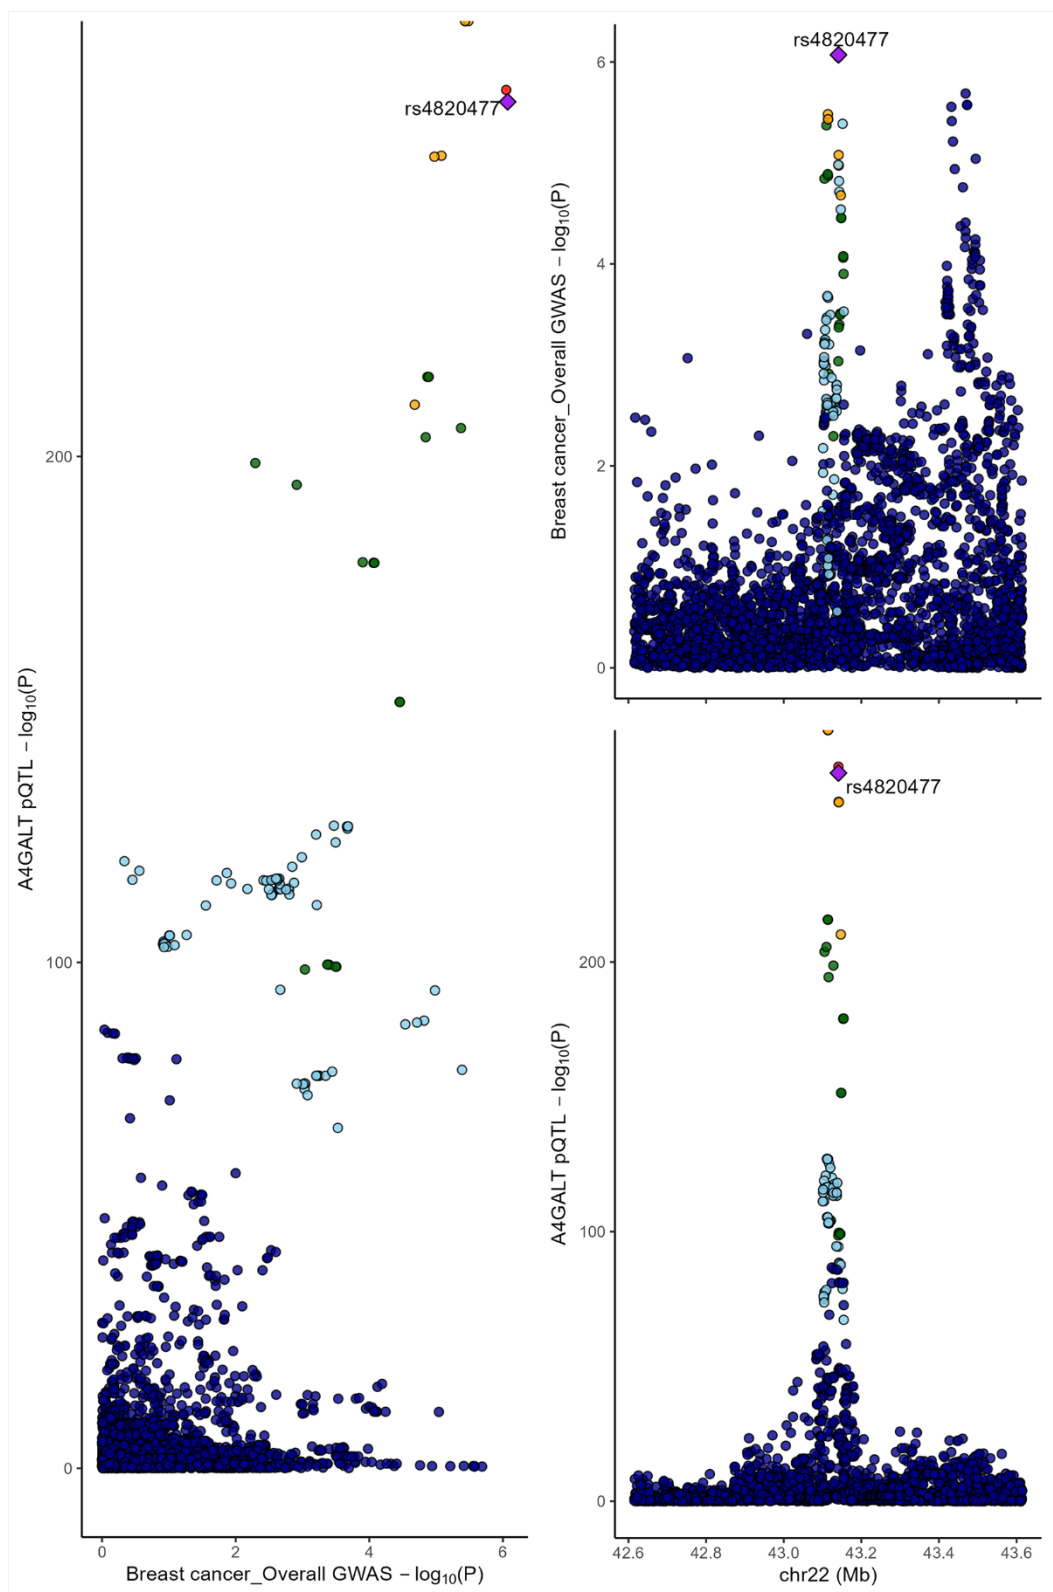

**Figure S5 Bayesian colocalization analysis for A4GALT and BC\_overall**

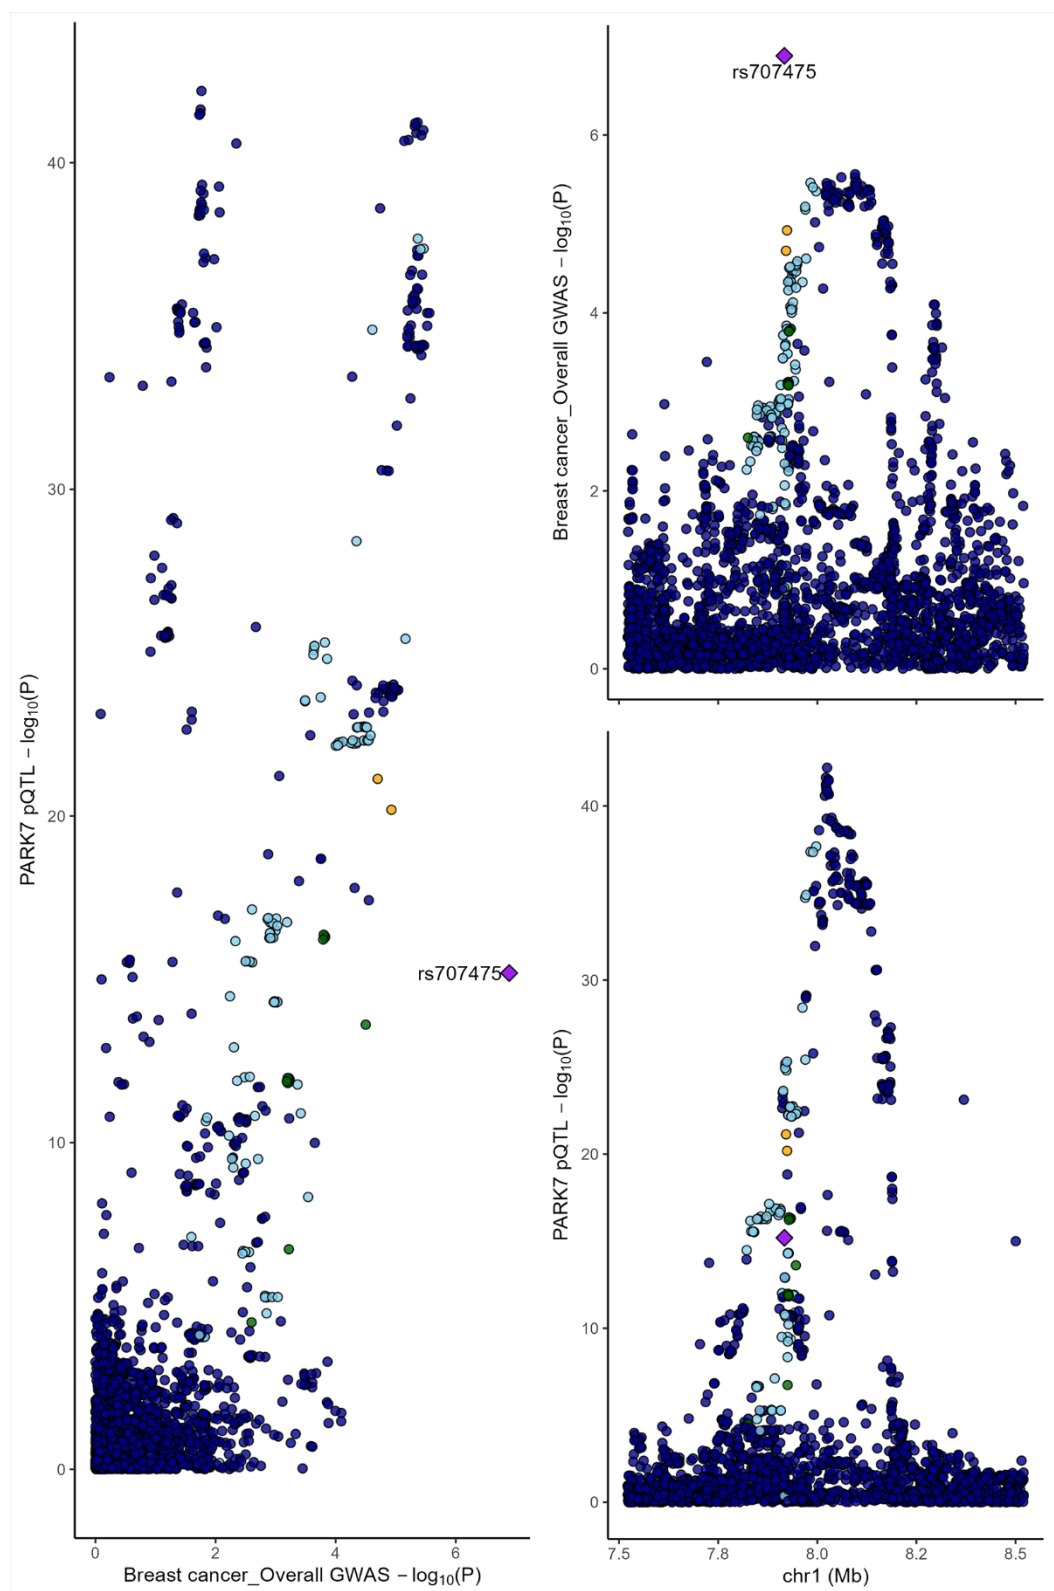

**Figure S6 Bayesian colocalization analysis for PARK7 and BC\_overall**

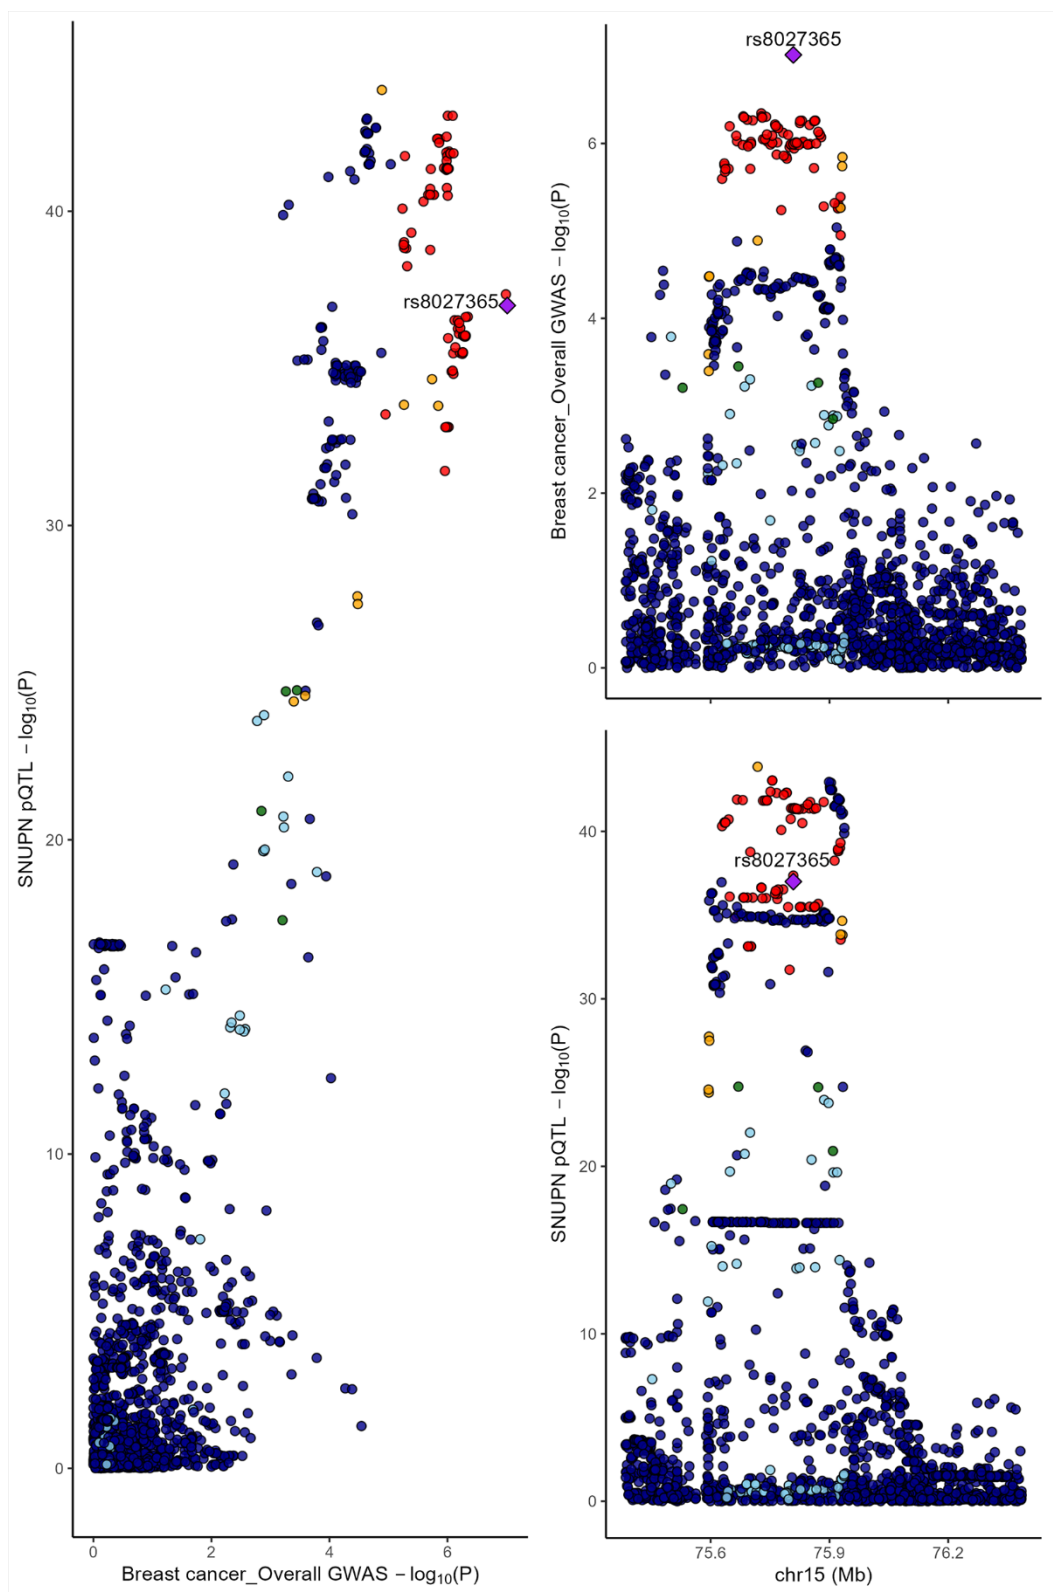

**Figure S7 Bayesian colocalization analysis for SNUPN and BC\_overall**

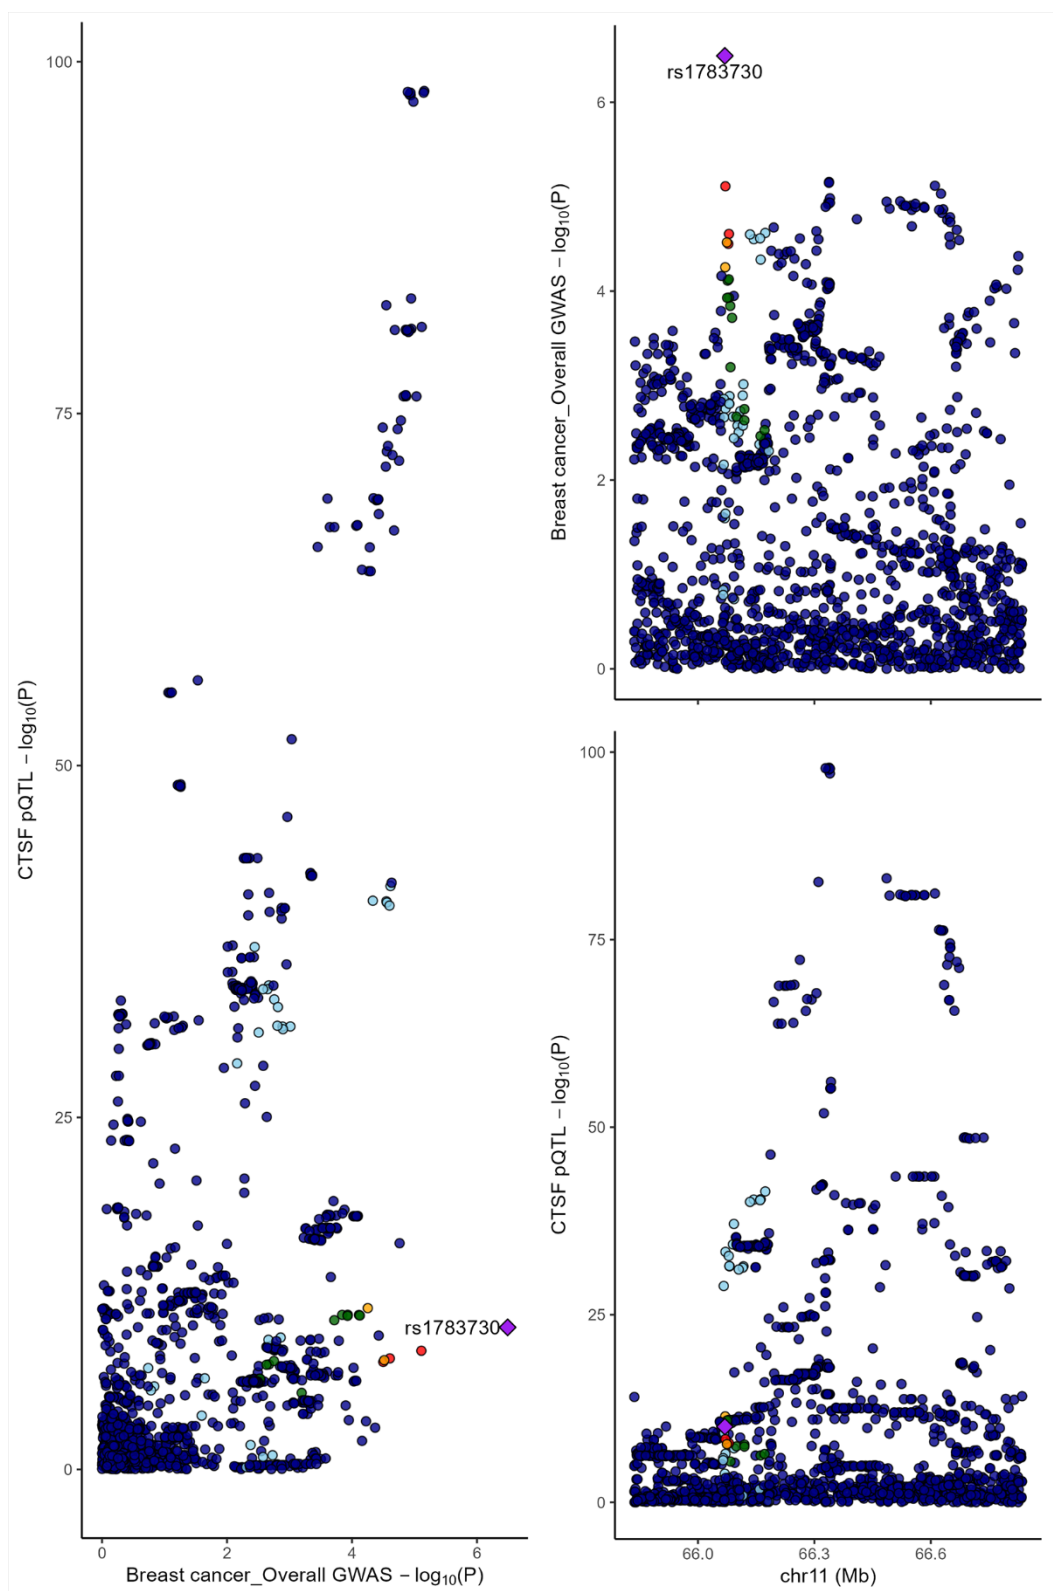

**Figure S8 Bayesian colocalization analysis for CTSF and BC\_overall**

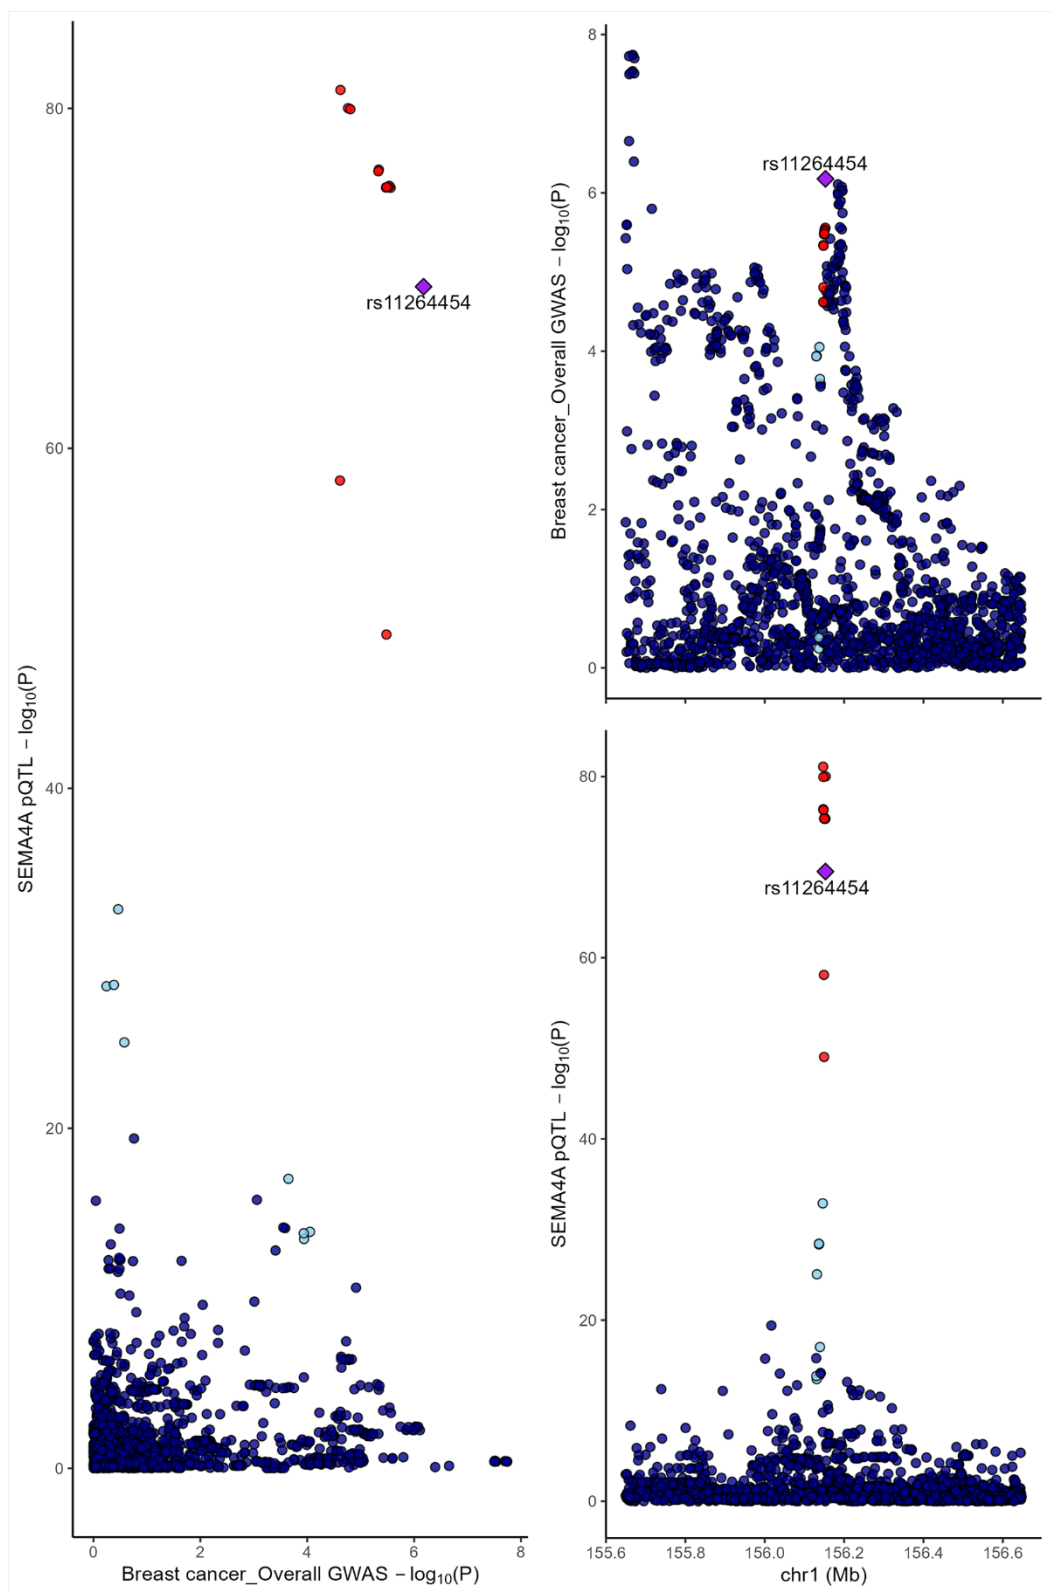

**Figure S9 Bayesian colocalization analysis for SEMA4A and BC\_overall**

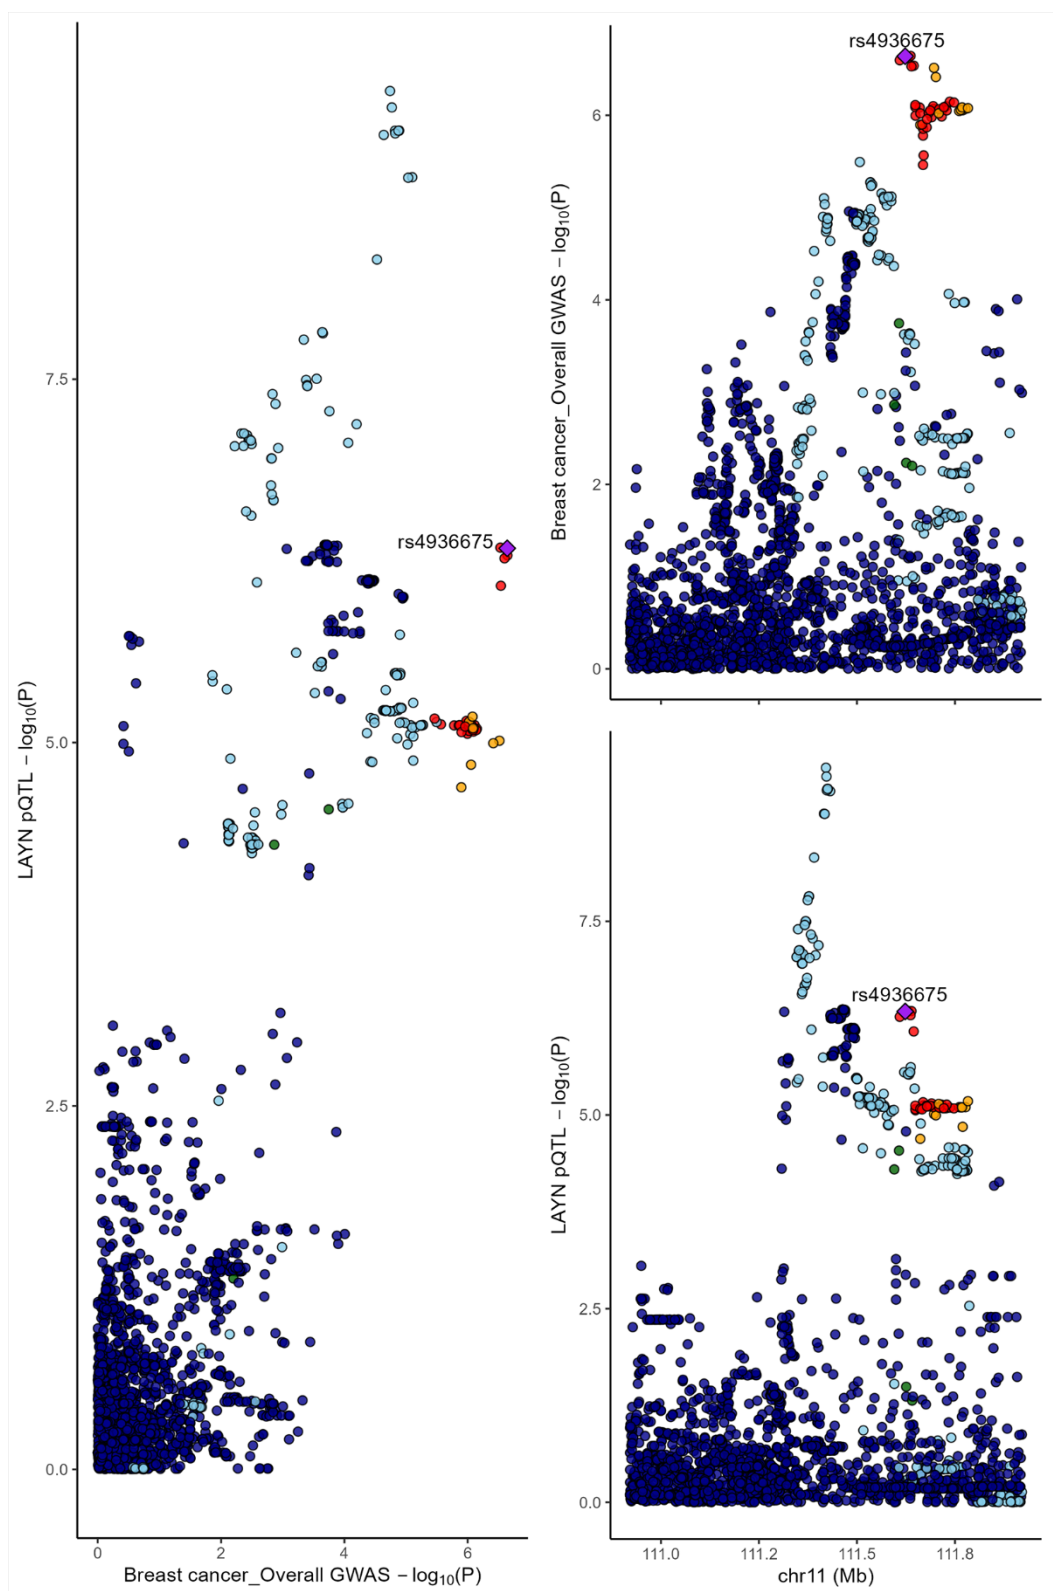

**Figure S10 Bayesian colocalization analysis for LAYN and BC\_overall**



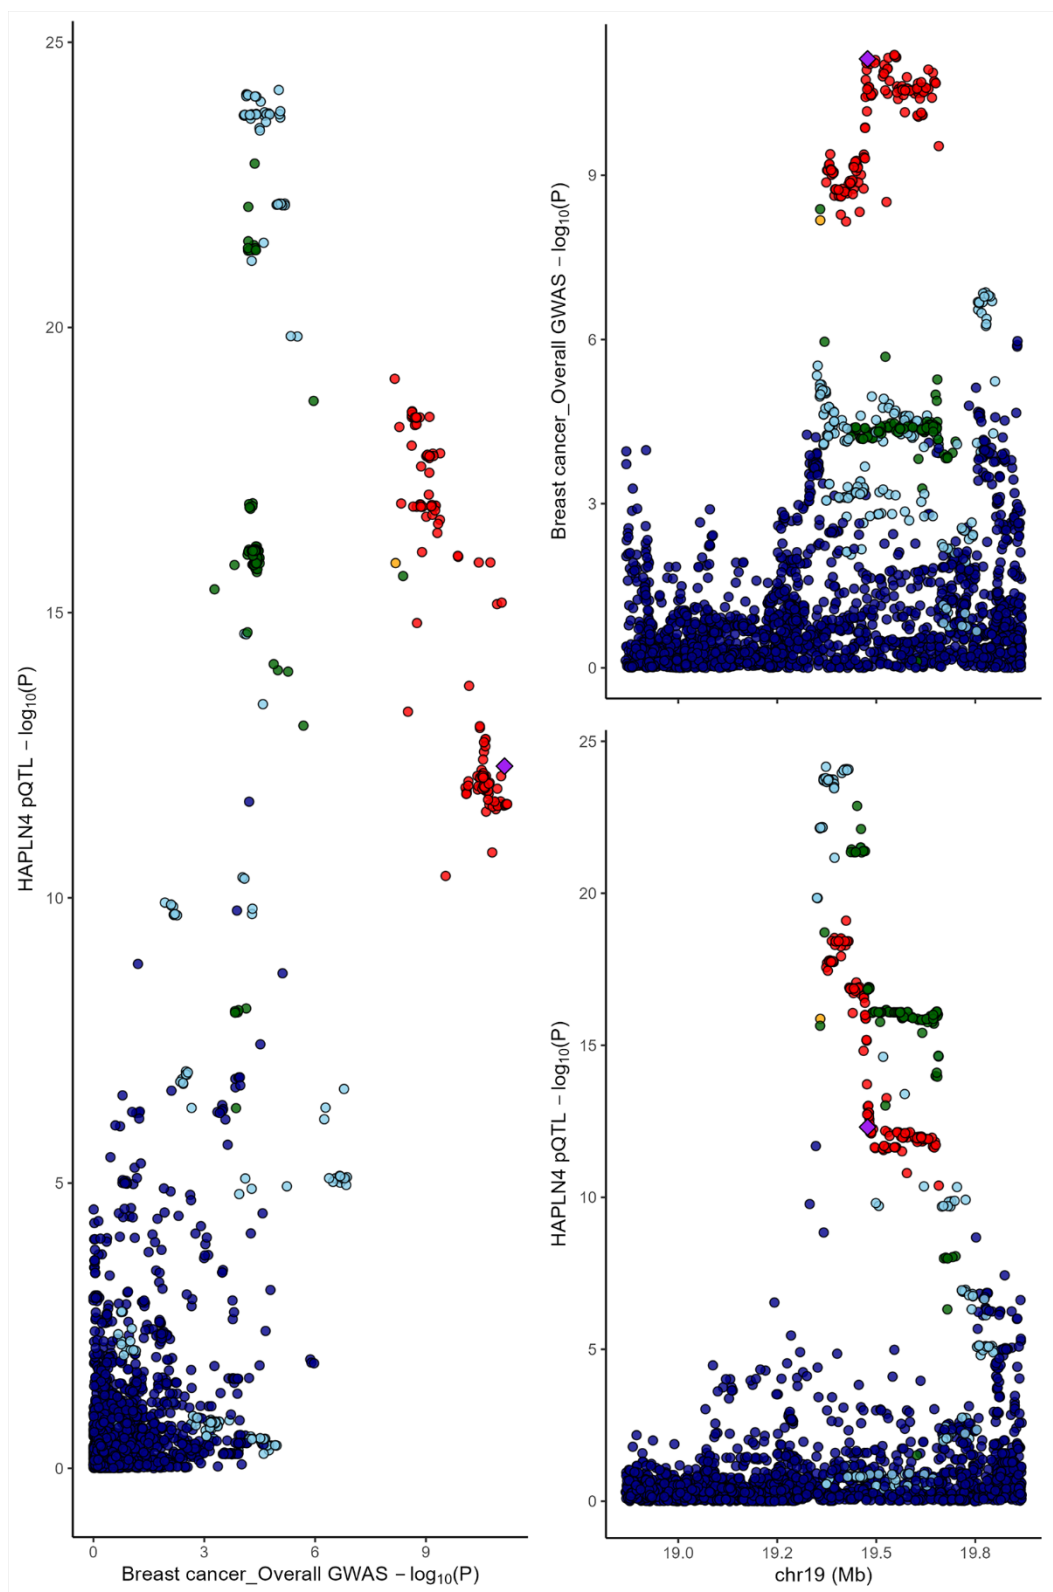

**Figure S11 Bayesian colocalization analysis for HAPLN4 and BC\_overall**

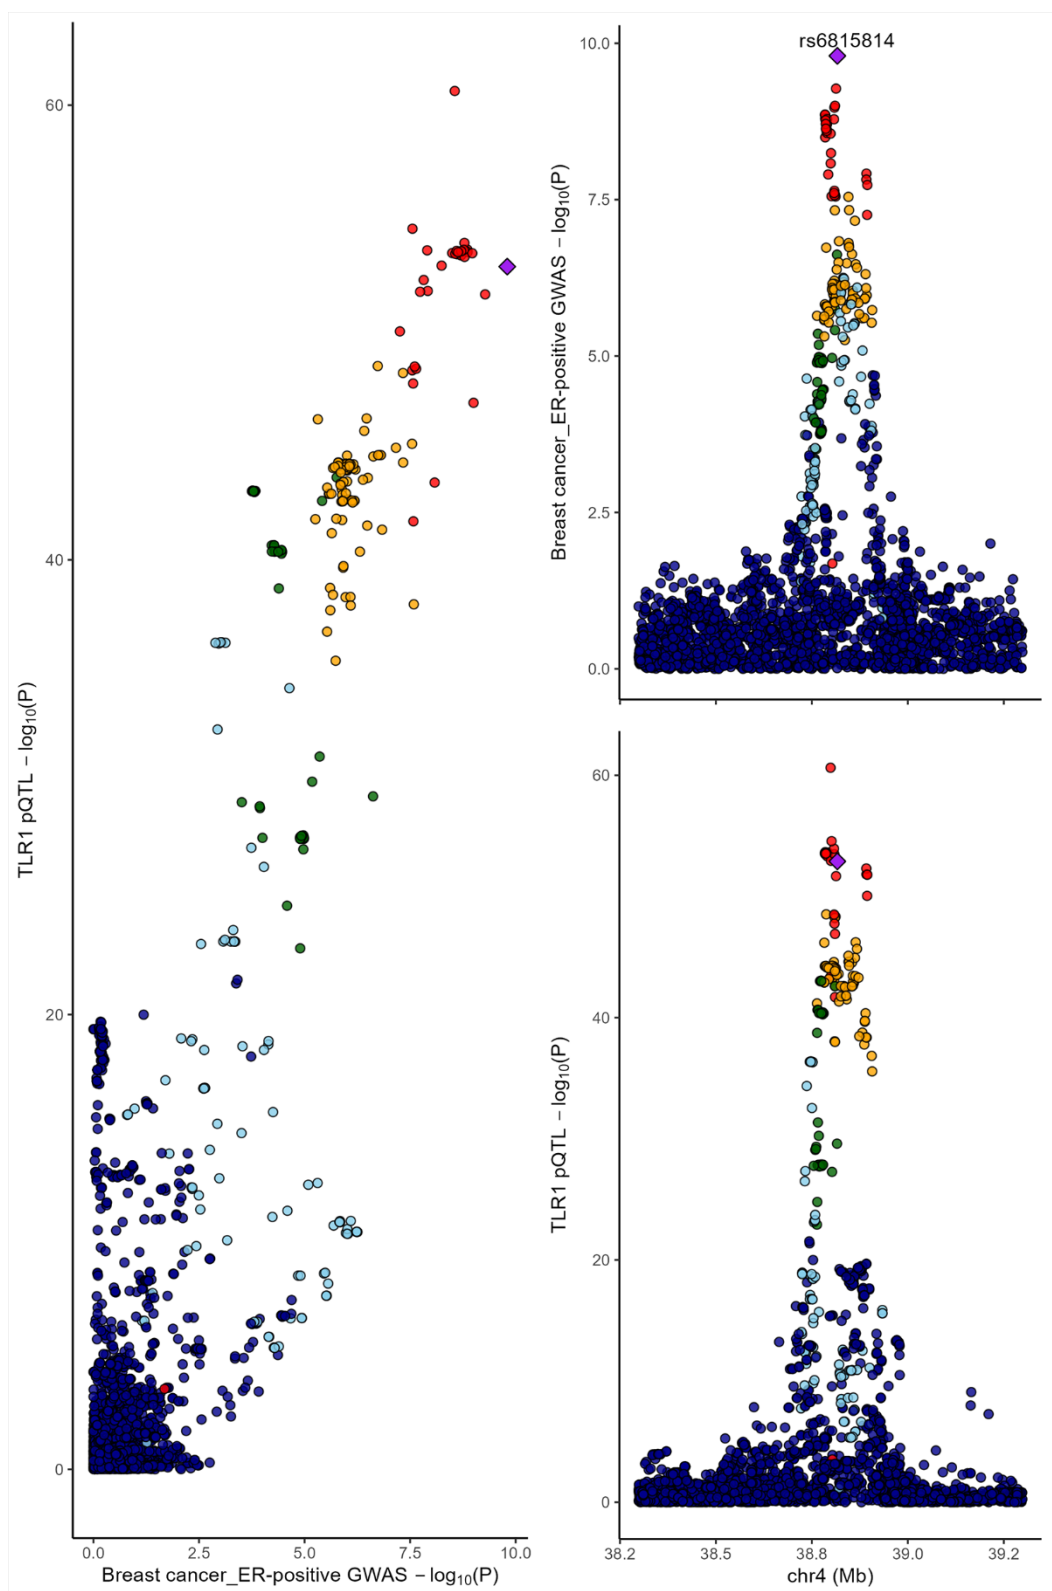

**Figure S12 Bayesian colocalization analysis for TLR1 and BC\_ER(+)**

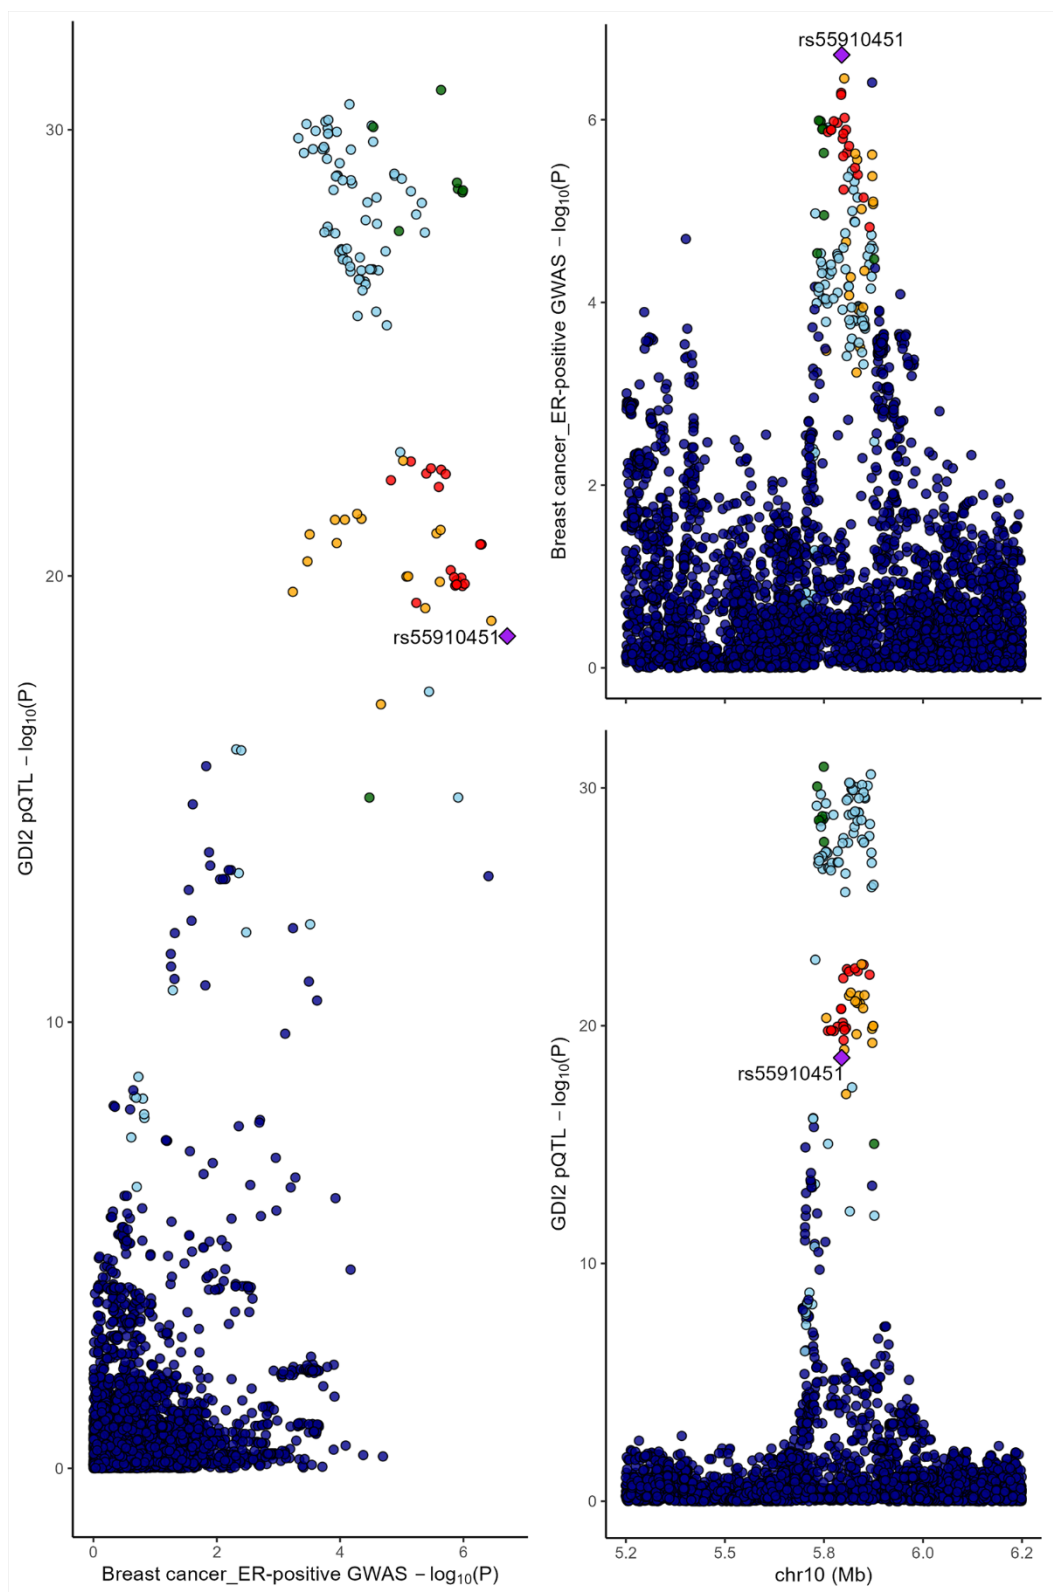

**Figure S13 Bayesian colocalization analysis for GDI2 and BC\_ER(+)**

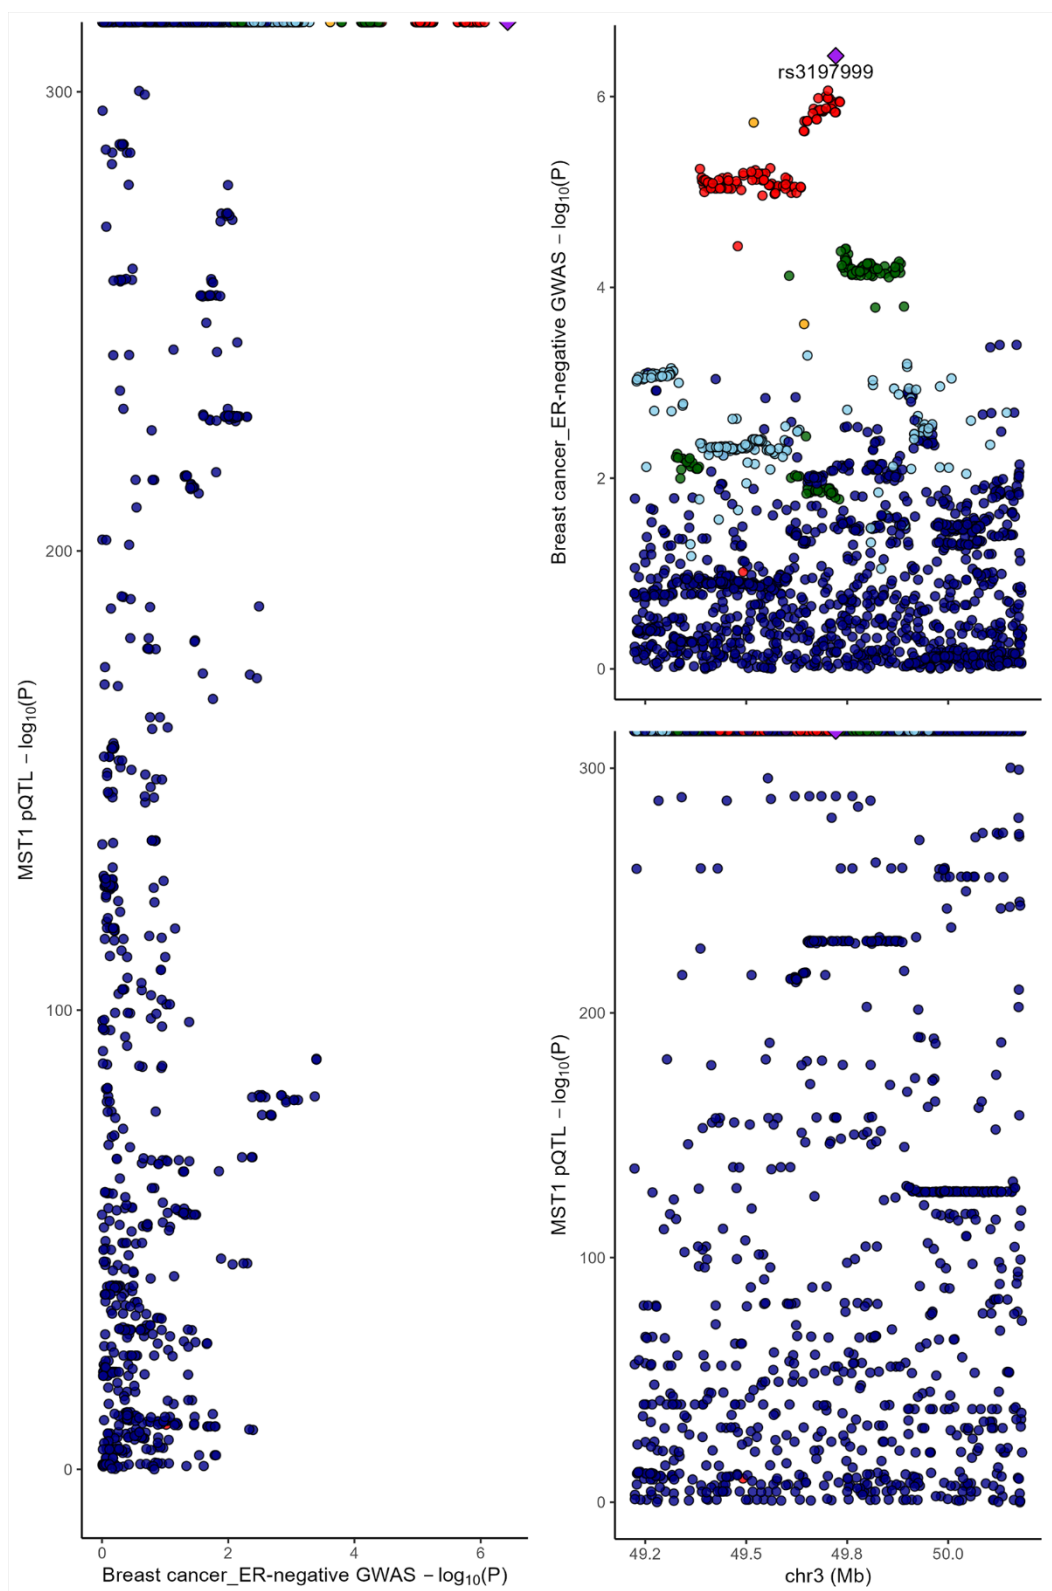

**Figure S14 Bayesian colocalization analysis for MST1 and BC\_ER(-)**

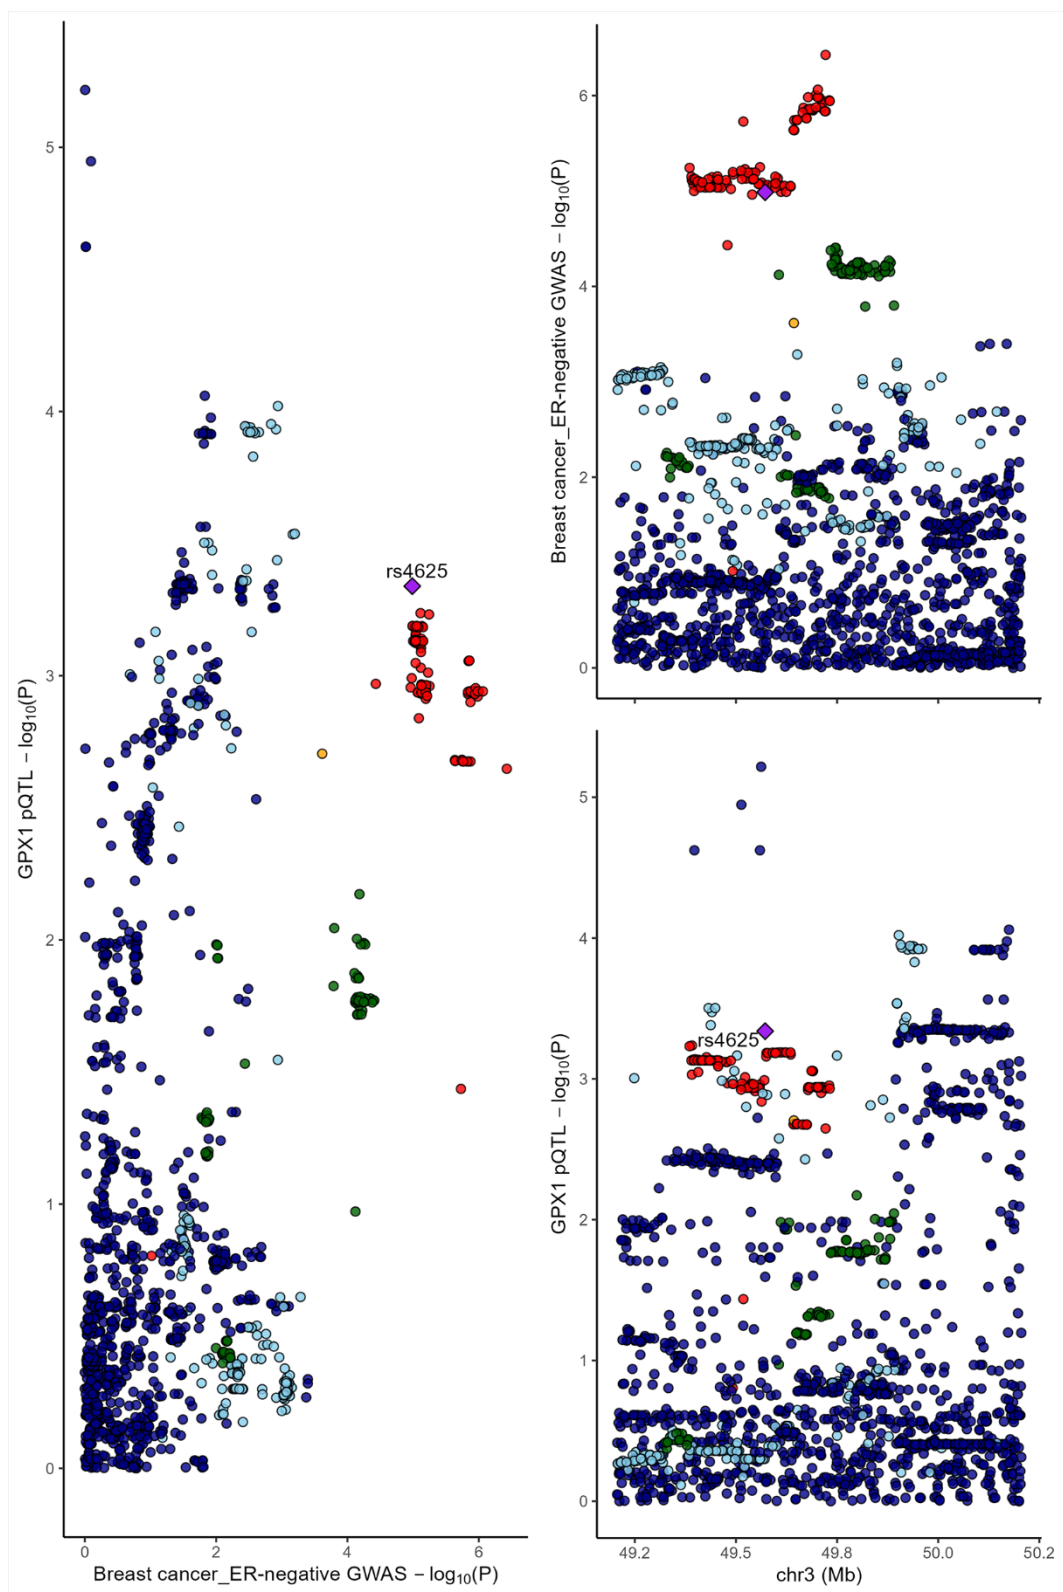

**Figure S15 Bayesian colocalization analysis for GPX1 and BC\_ER(-)**

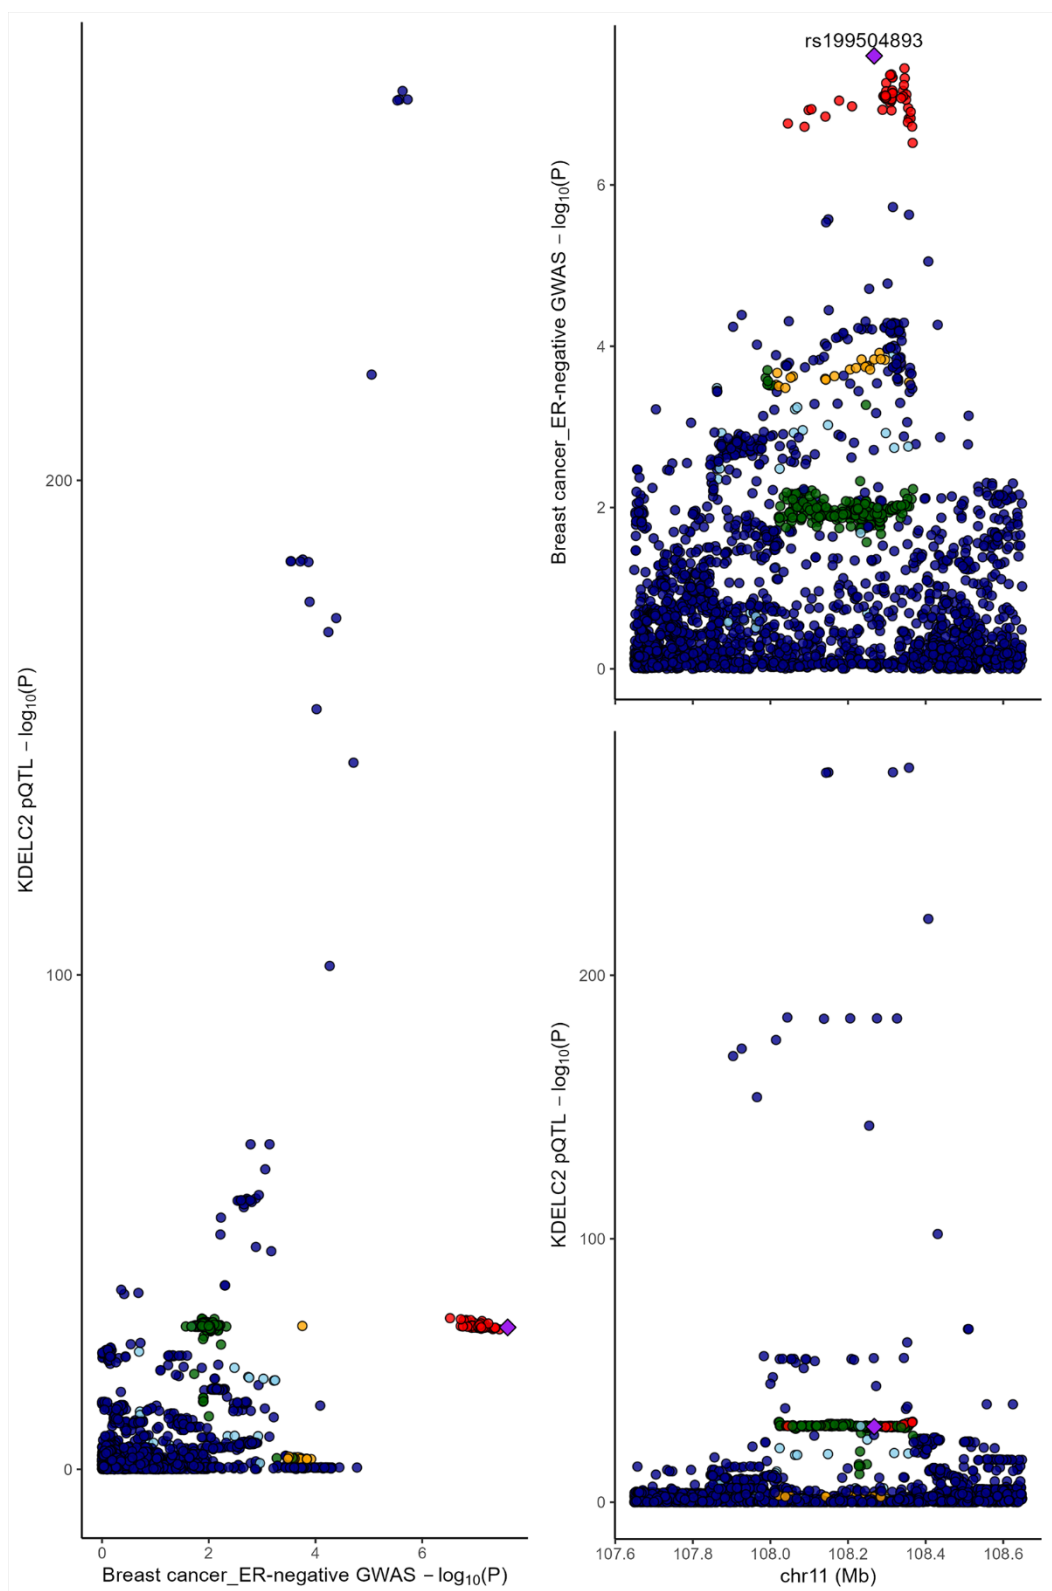

**Figure S16 Bayesian colocalization analysis for KDELC2 and BC\_ER(-)**

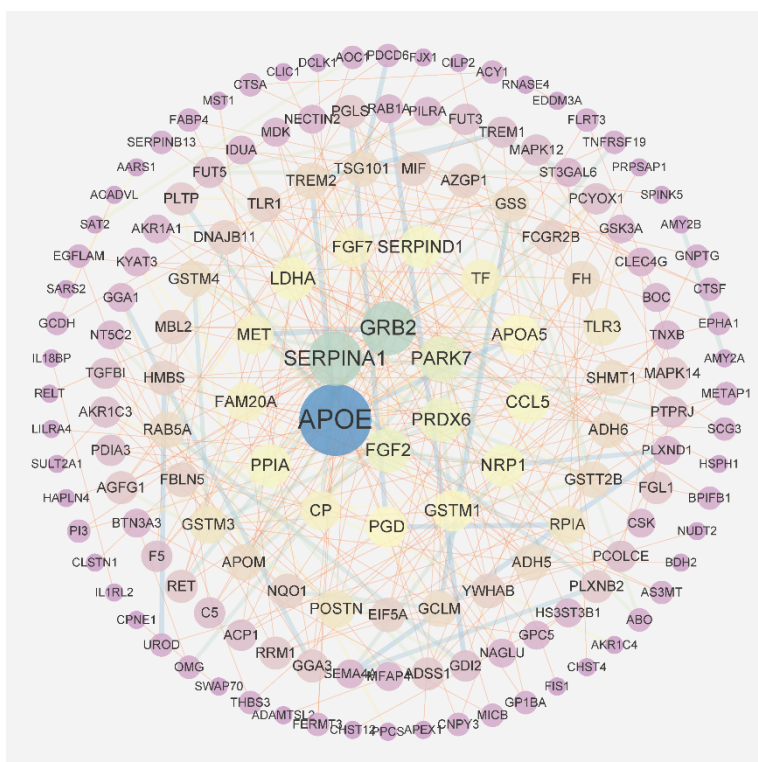

**Figure S17 Protein-protein interaction network between suggestive BC\_overall-related proteins ( $P < 0.05$ ) from plasma**



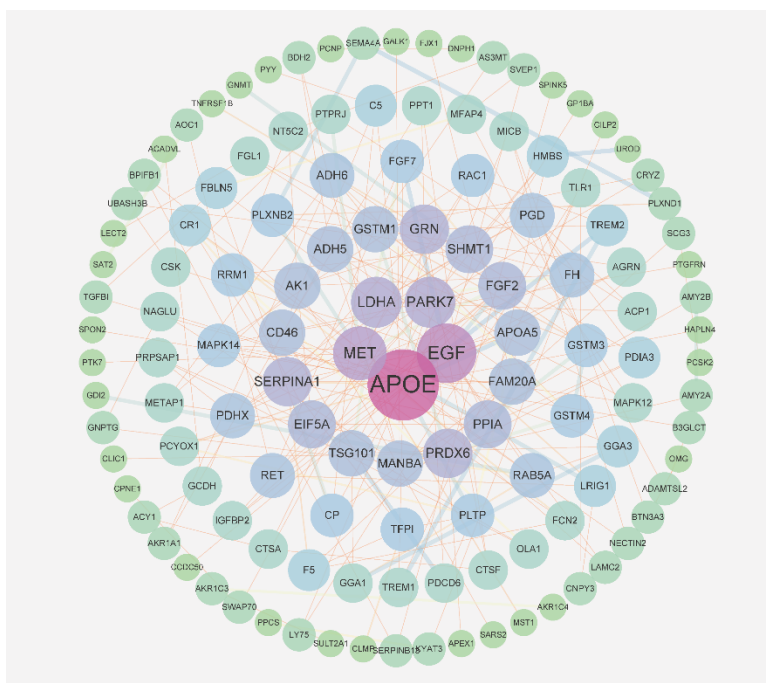

**Figure S18 Protein-protein interaction network between suggestive BC\_ER(+)-related proteins (P < 0.05) from plasma**



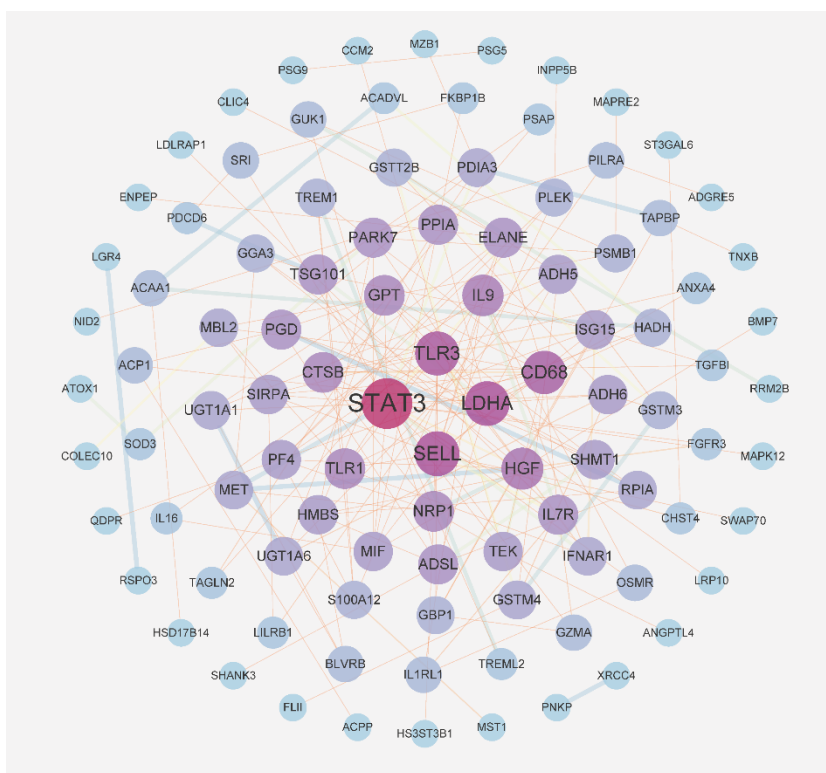

**Figure S19 Protein-protein interaction network between suggestive BC\_ER(-)-related proteins ( $P < 0.05$ ) from plasma**

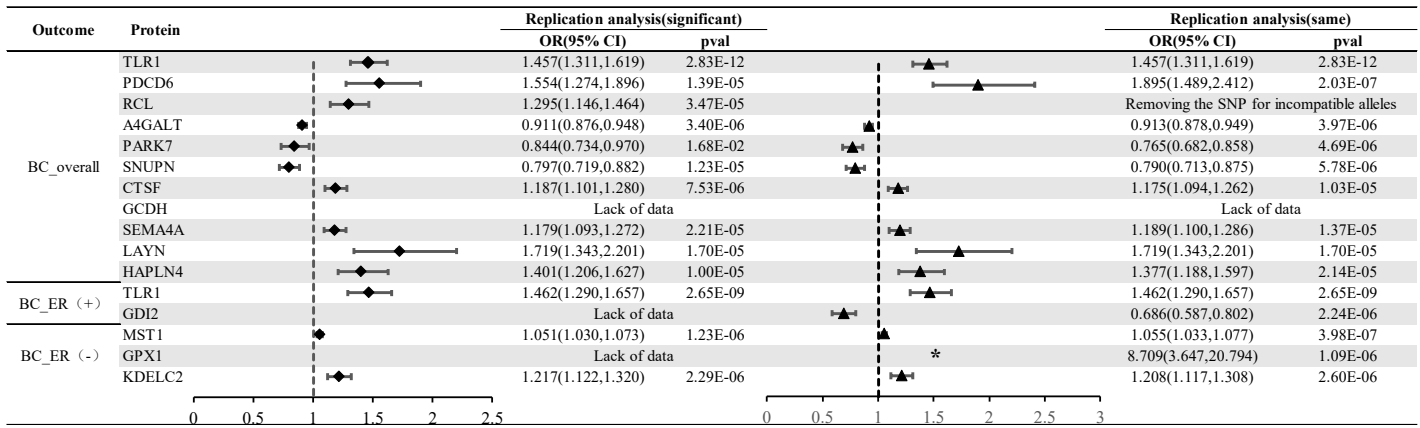

**Figure S20 Replication of causal relationship between prioritized proteins and breast cancer**

\* symbolizes instances where exceptionally large numerical values disrupt the aesthetic appeal of the forest plot, necessitating its use to maintain visual clarity.

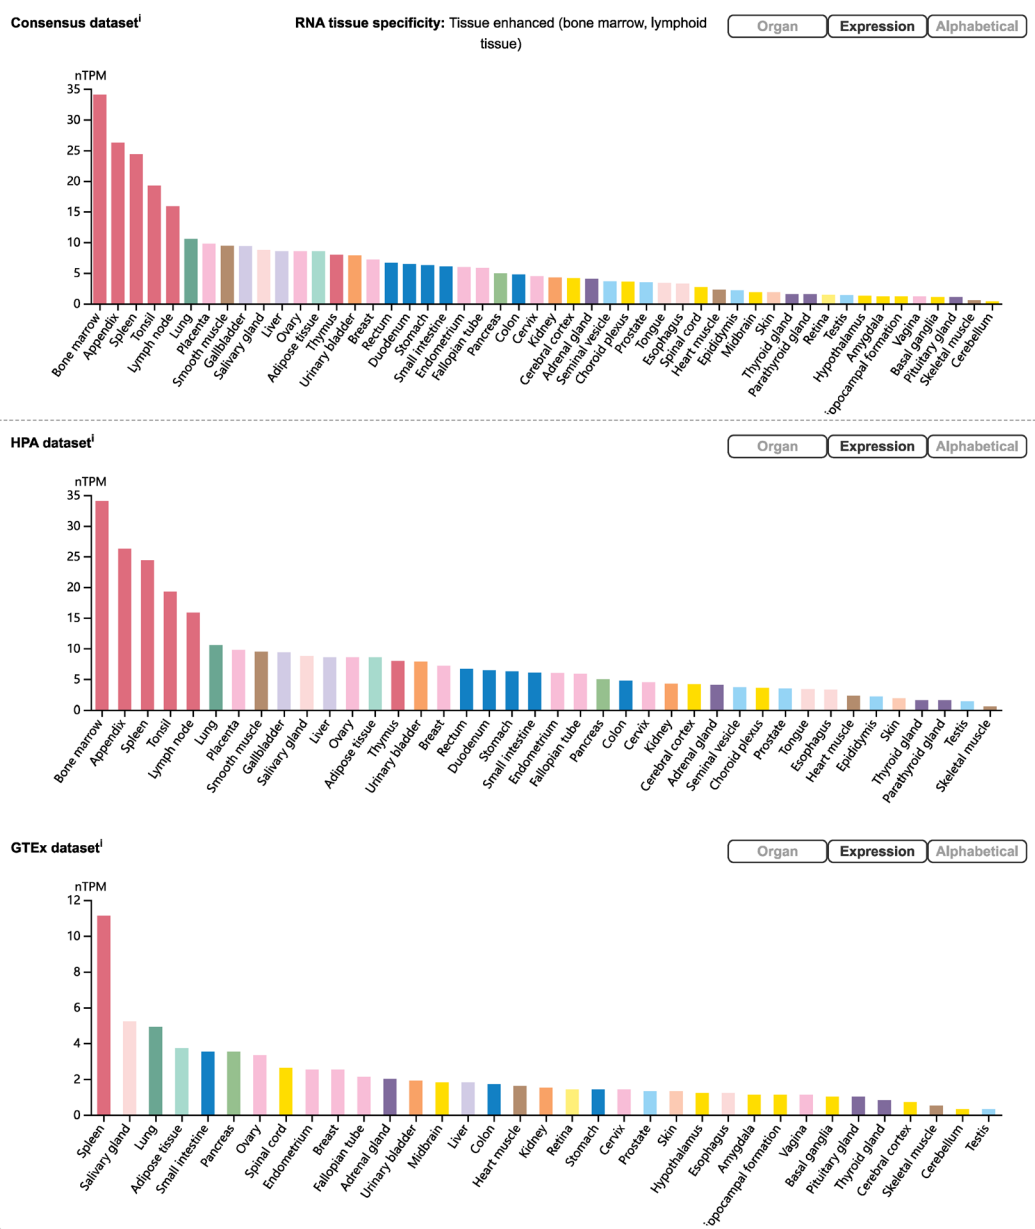

**Figure S21** The mRNA expression profile of TLR1 across human tissues (The human protein atlas, <https://www.proteinatlas.org/>).

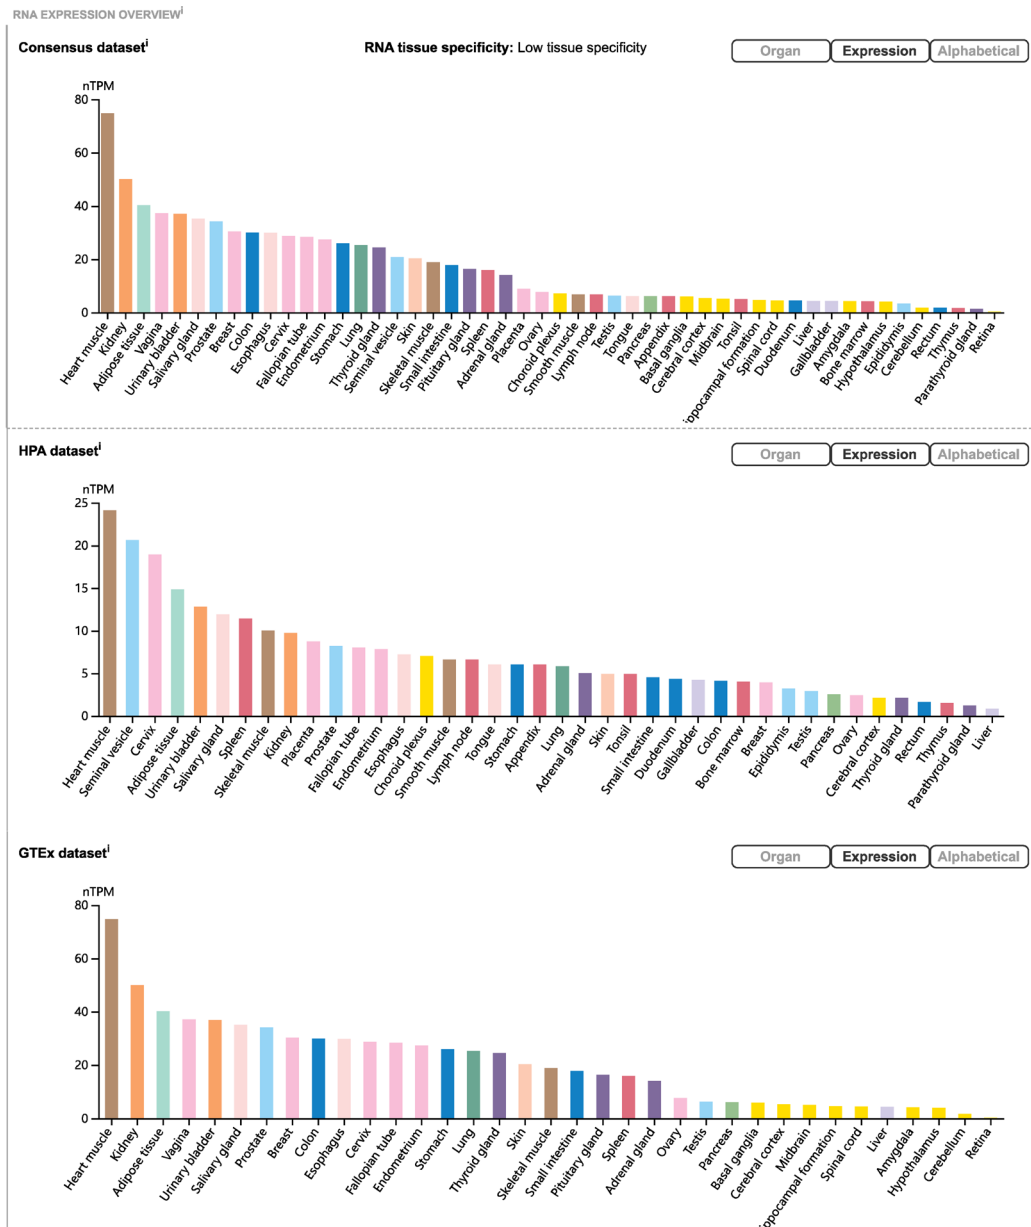

**Figure S22** The mRNA expression profile of A4GALT across human tissues (The human protein atlas, <https://www.proteinatlas.org/>).

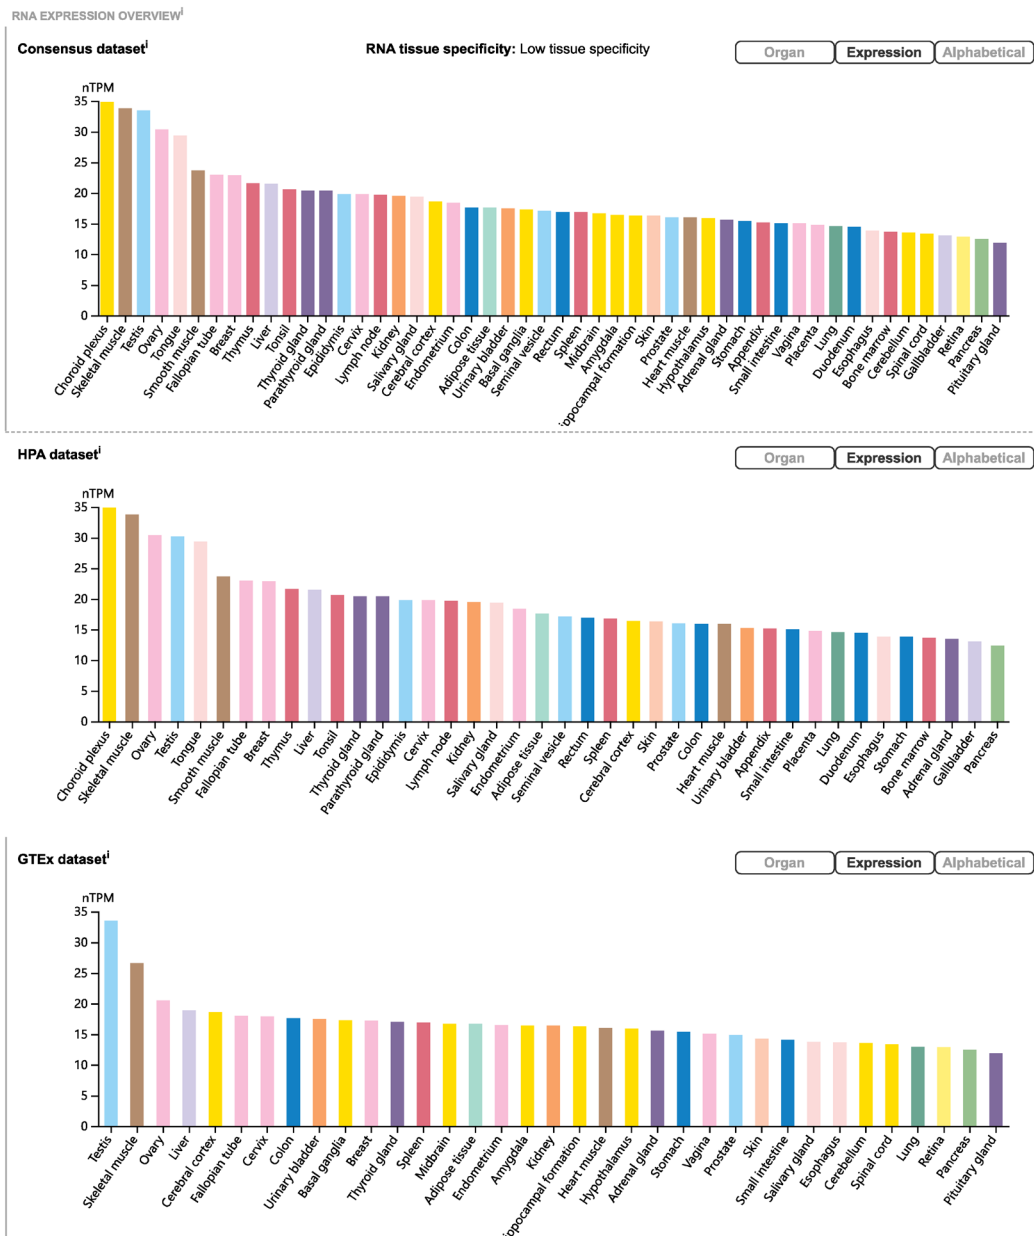

**Figure S23 The mRNA expression profile of SNUPN across human tissues (The human protein atlas, <https://www.proteinatlas.org/>).**

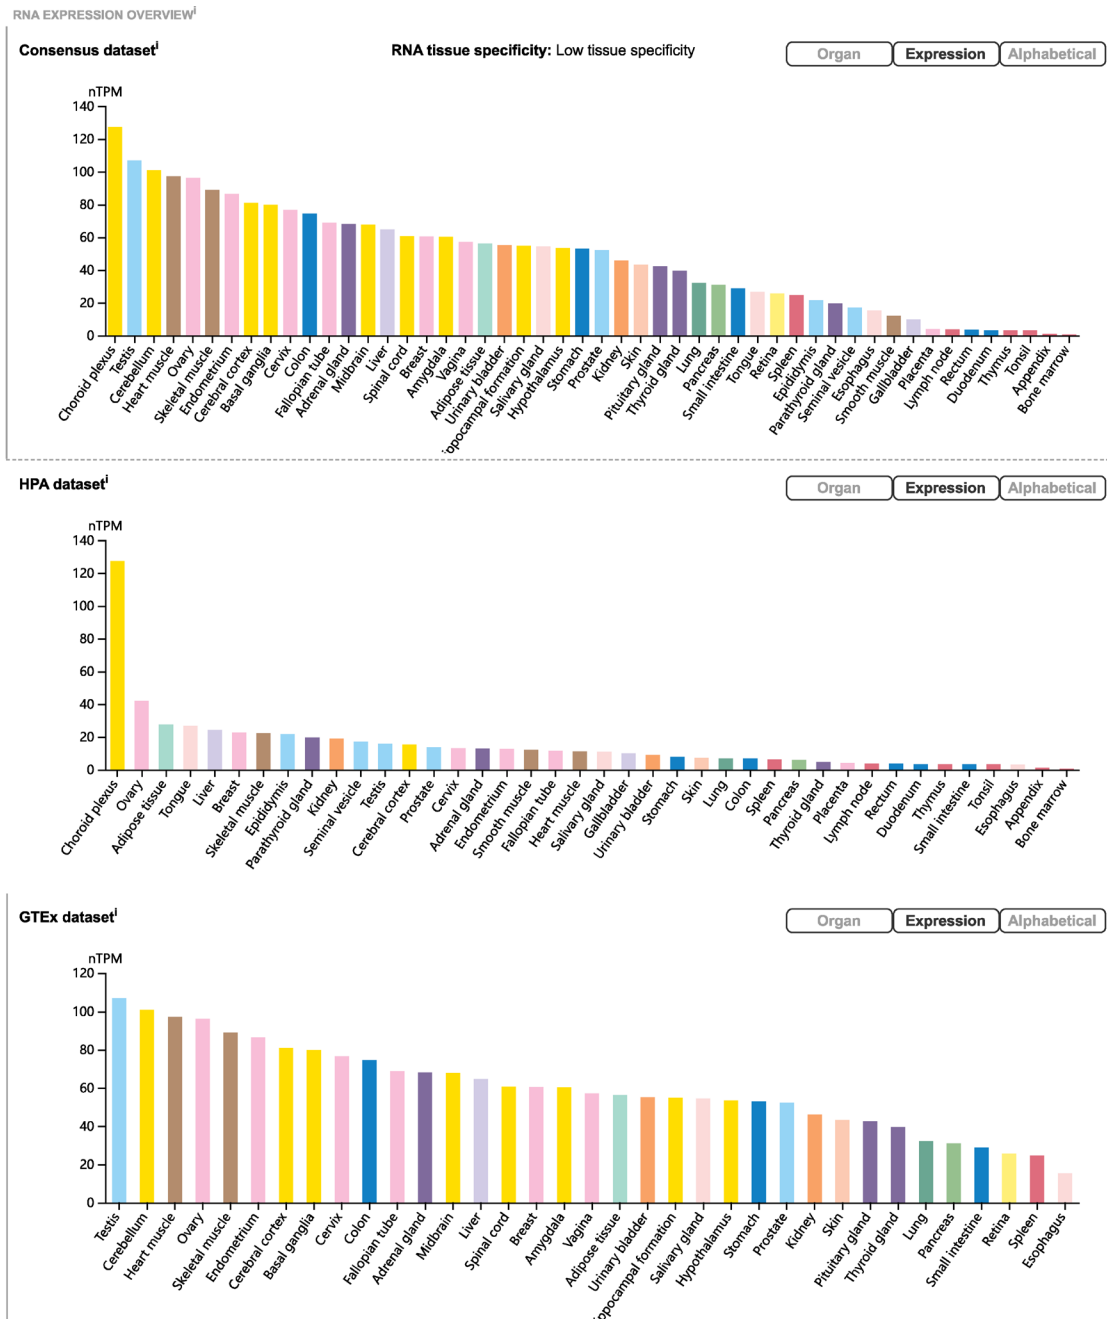

**Figure S24** The mRNA expression profile of CTSF across human tissues (The human protein atlas, <https://www.proteinatlas.org/>).
