# Supplementary material for: Identifying therapeutic targets for breast cancer: insights from systematic Mendelian randomization analysis
Source: Front Oncol. 2024 Jun 3;14:1407795. doi: 10.3389/fonc.2024.1407795 (PMC11180768; doi:10.3389/fonc.2024.1407795)
Supplement: Supplementary file 2 [file Table_1.xlsx]

## Sheet: Description
Table S1 Genetic instruments of plasma proteins used in primary MR analysis
Table S2 Genetic instruments of prioritized proteins for replication
Table S3 Genetic instruments of BC_overall used in bidirectional MR
Table S4 Genetic instruments of BC_ER(+) used in bidirectional MR
Table S5 Genetic instruments of BC_ER(-) used in bidirectional MR
Table S6 GWAS catalog of 525 diseases used for phenome-wide Mendelian Randomization analysis
Table S7 Genome-wide significant association of SNPs as genetic instruments of prioritized proteins
Table S8 GO biological process enrichment for the suggestive proteins of BC_overall
Table S9 GO biological process enrichment for the suggestive proteins of BC_ER(+)
Table S10 GO biological process enrichment for the suggestive proteins of BC_ER(-)
Table S11 Phenome-wide Mendelian Randomization analysis to reveal potential on-target side effects of TLR1
Table S12 Phenome-wide Mendelian Randomization analysis to reveal potential on-target side effects of PDCD6
Table S13 Phenome-wide Mendelian Randomization analysis to reveal potential on-target side effects of RCL
Table S14 Phenome-wide Mendelian Randomization analysis to reveal potential on-target side effects of A4GALT
Table S15 Phenome-wide Mendelian Randomization analysis to reveal potential on-target side effects of PARK7
Table S16 Phenome-wide Mendelian Randomization analysis to reveal potential on-target side effects of SNUPN
Table S17 Phenome-wide Mendelian Randomization analysis to reveal potential on-target side effects of CTSF
Table S18 Phenome-wide Mendelian Randomization analysis to reveal potential on-target side effects of GCDH
Table S19 Phenome-wide Mendelian Randomization analysis to reveal potential on-target side effects of SEMA4A
Table S20 Phenome-wide Mendelian Randomization analysis to reveal potential on-target side effects of LAYN
Table S21 Phenome-wide Mendelian Randomization analysis to reveal potential on-target side effects of HAPLN4
Table S22 Phenome-wide Mendelian Randomization analysis to reveal potential on-target side effects of GDI2
Table S23 Phenome-wide Mendelian Randomization analysis to reveal potential on-target side effects of MST1
Table S24 Phenome-wide Mendelian Randomization analysis to reveal potential on-target side effects of GPX1
Table S25 Phenome-wide Mendelian Randomization analysis to reveal potential on-target side effects of KDELC2
Table 26 Candidate drug predicted using DSigDB
Table 27 Docking results of available proteins with small molecules

## Sheet: Table S1
Table S1 Genetic instruments of plasma proteins used in primary MR analysis
UniProt id	protein	SNP	effect_allele	eaf	beta	pval	samplesize	se	R2	F statistics
A2RU67	KIAA1467	rs182170698	A	0.0192708	0.824693	3.57e-43	7213	0.0598659	0.0256349	189.717
A6NDG6	PGP	rs116977380	T	0.0368085	0.884351	1.58e-90	7213	0.0438311	0.0534226	406.972
A6NGN9	IGLON5	rs7246422	C	0.46437	0.173209	2.87e-25	7213	0.0166771	0.0147346	107.84
A6NH11	GLTPD2	rs34460487	A	0.341883	0.284825	4.82e-61	7213	0.0172794	0.0363015	271.631
A6NHS7	MANSC4	rs12368838	G	0.226951	0.889503	1e-200	7213	0.029426	0.112439	913.509
A6NI73	LILRA5	rs397600	G	0.344586	-0.275889	2.21e-56	7213	0.0174376	0.0335402	250.252
A8K2U0	A2ML1	rs1558526	A	0.249341	-0.262192	5.51e-43	7213	0.0190764	0.0255213	188.854
O00151	PDLIM1	rs1328599	G	0.0817968	0.451264	3.38e-50	7213	0.0302896	0.0298535	221.898
O00182	LGALS9	rs4239242	C	0.365798	-0.300878	7.06e-70	7213	0.017027	0.0414938	312.165
O00233	PSMD9	rs10743185	G	0.431582	-0.205487	1.75e-34	7213	0.016779	0.0203696	149.94
O00241	SIRPB1	rs12480515	T	0.255442	0.844241	1e-200	7213	0.0279286	0.112439	913.509
O00244	ATOX1	rs1549921	G	0.425135	-0.194396	3.54e-31	7213	0.0167395	0.0183539	134.824
O00253	AGRP	rs114322795	T	0.03972	0.663465	1.8e-54	7213	0.0426883	0.0324039	241.49
O00292	LEFTY2	rs360077	C	0.362332	0.750451	1e-200	7213	0.0248259	0.112439	913.509
O00299	CLIC1	rs1265947	T	0.106266	0.183436	1.59e-11	7213	0.0272183	0.00625756	45.4074
O00300	TNFRSF11B	rs2468184	A	0.414876	-0.141371	4.42e-17	7213	0.0168275	0.00969027	70.5603
O00330	PDHX	rs2915221	C	0.316096	0.335834	4.51e-81	7213	0.0176109	0.0479965	363.552
O00339	MATN2	rs17831160	A	0.0344517	0.566124	1.79e-36	7213	0.0448841	0.0215798	159.044
O00451	GFRA2	rs15881	C	0.460557	0.359501	6.06e-104	7213	0.016605	0.0610186	468.598
O00462	MANBA	rs223492	C	0.352627	0.697192	1e-200	7213	0.0230641	0.112439	913.509
O00468	AGRN	rs4970350	G	0.427423	-0.294348	2.3e-68	7213	0.0168459	0.0406084	305.222
O00469	PLOD2	rs16857612	A	0.192569	0.124749	3.31e-09	7213	0.0210887	0.00482787	34.9827
O00478	BTN3A3	rs9393711	T	0.107306	-1.17022	1e-200	7213	0.0387125	0.112439	913.509
O00481	BTN3A1	rs9467732	T	0.291418	-0.179054	1.18e-22	7213	0.0182797	0.0131273	95.9204
O00499	BIN1	rs35103166	C	0.379107	0.189816	9.16e-29	7213	0.0170574	0.0168784	123.8
O00533	CHL1	rs990284	G	0.374879	-0.306673	1.91e-71	7213	0.0171583	0.0424096	319.36
O00548	DLL1	rs4710790	C	0.427145	0.175398	9.68e-26	7213	0.0167217	0.0150244	109.994
O00584	RNASET2	rs9457245	T	0.0745182	-0.841235	3.16e-165	7213	0.0307078	0.0942399	750.269
O00585	CCL21	rs10972201	A	0.338625	-0.121072	3.83e-12	7213	0.0174372	0.00663934	48.1963
O00587	MFNG	rs8192548	A	0.0169139	-0.7261	4.12e-29	7213	0.0648357	0.0170908	125.385
O00602	FCN1	rs7037264	A	0.403022	0.489293	2.99e-196	7213	0.016372	0.110184	892.927
O00626	CCL22	rs170364	T	0.251144	-0.227769	2.99e-32	7213	0.0192659	0.0190091	139.731
O00746	NME4	rs6600214	T	0.319077	0.173731	9.08e-23	7213	0.0176885	0.0131974	96.439
O00764	PDXK	rs79343092	G	0.0128934	-0.748543	2.7e-24	7213	0.0736033	0.0141364	103.4
O14594	NCAN	rs2228603	T	0.0811036	-0.451966	3.18e-50	7213	0.0303284	0.0298694	222.02
O14610	GNGT2	rs35638197	C	0.0558713	-0.221329	1.28e-09	7213	0.0364634	0.00508198	36.8333
O14625	CXCL11	rs6827617	G	0.390683	0.192949	8.32e-30	7213	0.017015	0.0175159	128.559
O14737	PDCD5	rs4499344	A	0.297518	0.713482	1e-200	7213	0.023603	0.112439	913.509
O14773	TPP1	rs11040938	G	0.422432	0.229556	3.65e-42	7213	0.0168707	0.0250258	185.093
O14786	NRP1	rs734186	A	0.378691	-0.394068	2.08e-120	7213	0.0168893	0.0701782	544.25
O14791	APOL1	rs9610469	G	0.315749	-0.425378	1.84e-127	7213	0.0177114	0.0740485	576.665
O14810	CPLX1	rs11248039	C	0.335228	-0.144202	3.75e-16	7213	0.0177014	0.00911665	66.345
O14907	TAX1BP3	rs160589	A	0.024539	0.488345	2e-19	7213	0.0541807	0.0111374	81.2165
O14931	NCR3	rs986475	G	0.0927492	-0.620455	6.64e-109	7213	0.0279858	0.0637968	491.388
O14960	LECT2	rs2428665	A	0.440039	-0.769895	1e-200	7213	0.0254692	0.112439	913.509
O15031	PLXNB2	rs28573806	C	0.3972	0.644498	1e-200	7213	0.0213209	0.112439	913.509
O15041	SEMA3E	rs73707827	A	0.122556	-1.07026	1e-200	7213	0.0354057	0.112439	913.509
O15075	DCLK1	rs7339267	A	0.217455	0.309996	3e-53	7213	0.020181	0.031676	235.888
O15123	ANGPT2	rs1968586	T	0.365243	-0.218101	1.49e-36	7213	0.017272	0.0216282	159.409
O15197	EPHB6	rs7789303	G	0.280882	-0.59113	1e-200	7213	0.0195554	0.112439	913.509
O15232	MATN3	rs11694716	G	0.365729	0.743662	1e-200	7213	0.0246013	0.112439	913.509
O15264	MAPK13	rs12210904	A	0.282823	0.146546	2.24e-15	7213	0.0184863	0.00863704	62.8243
O15305	PMM2	rs34258285	C	0.028005	-0.660606	4.43e-40	7213	0.0498519	0.0237662	175.55
O15335	CHAD	rs184613584	C	0.0116456	-0.597236	1.76e-14	7213	0.0778965	0.0080838	58.7673
O15382	BCAT2	rs62125920	G	0.199778	-0.58207	3.97e-182	7213	0.0202258	0.102996	827.981
O15389	SIGLEC5	rs872629	A	0.119506	-0.996177	1e-200	7213	0.0329549	0.112439	913.509
O15394	NCAM2	rs2826851	G	0.293359	0.549438	1e-200	7213	0.0181762	0.112439	913.509
O15400	STX7	rs3813356	T	0.440871	-0.222839	1.51e-40	7213	0.0167147	0.024049	177.69
O15444	CCL25	rs74959615	A	0.0751421	-1.17087	1e-200	7213	0.038734	0.112439	913.509
O15455	TLR3	rs3775291	T	0.298974	-0.788587	1e-200	7213	0.0260875	0.112439	913.509
O15467	CCL16	rs112689088	C	0.0931651	-1.30751	1e-200	7213	0.0432542	0.112439	913.509
O15533	TAPBP	rs469064	C	0.473589	0.451191	9.18e-173	7213	0.0161023	0.0981654	784.923
O43155	FLRT2	rs17796783	C	0.286219	-0.536857	6.31e-200	7213	0.0177958	0.112037	909.83
O43240	KLK10	rs2569454	T	0.433869	-0.658504	1e-200	7213	0.0217842	0.112439	913.509
O43278	SPINT1	rs17658212	T	0.0620408	-0.480648	1.56e-45	7213	0.0339377	0.0270558	200.525
O43291	SPINT2	rs71354995	G	0.252461	-0.860904	1e-200	7213	0.0284799	0.112439	913.509
O43300	LRRTM2	rs10071381	T	0.295231	0.181441	2.5e-23	7213	0.0182337	0.013542	98.9923
O43353	RIPK2	rs34211510	T	0.0804104	0.18844	5.42e-10	7213	0.030362	0.00531197	38.5092
O43405	COCH	rs28400019	A	0.118328	0.711235	3e-181	7213	0.0247745	0.102545	823.942
O43447	PPIH	rs78676038	C	0.0356994	0.299979	2.38e-11	7213	0.0449031	0.00614941	44.6178
O43488	AKR7A2	rs74430522	A	0.0943435	-0.521227	4.72e-77	7213	0.0280541	0.0456714	345.097
O43508	TNFSF12	rs62059804	A	0.256412	0.180916	2.14e-21	7213	0.0190478	0.0123523	90.1866
O43555	GNRH2	rs6138990	T	0.156384	-0.161103	2.79e-12	7213	0.0230545	0.00672433	48.8174
O43598	RCL	rs114371775	C	0.105296	-0.276876	3.23e-25	7213	0.0266874	0.0147031	107.606
O43633	CHMP2A	rs11673465	C	0.203244	0.140955	1.19e-11	7213	0.0207855	0.00633527	45.9749
O43639	NCK2	rs1465639	C	0.377859	-0.177641	1.71e-25	7213	0.017023	0.0148727	108.866
O43699	SIGLEC6	rs4802807	A	0.407528	0.603958	1e-200	7213	0.0199797	0.112439	913.509
O43708	GSTZ1	rs7975	A	0.323097	0.831763	1e-200	7213	0.0275158	0.112439	913.509
O43813	LANCL1	rs2287418	C	0.496742	-0.136082	3.45e-16	7213	0.016684	0.00913902	66.5093
O43819	SCO2	rs11479	A	0.08859	-0.278112	9.34e-22	7213	0.0290185	0.0125741	91.8267
O43854	EDIL3	rs10073371	C	0.121863	-0.149468	4.29e-09	7213	0.0254517	0.00475854	34.4779
O43866	CD5L	rs2765501	A	0.420144	0.376988	6.98e-113	7213	0.0166964	0.0660134	509.667
O43897	TLL1	rs1903176	A	0.331415	-0.0989996	2.05e-08	7213	0.0176541	0.00434079	31.4379
O43916	CHST1	rs753198	C	0.282337	-0.109412	3.39e-09	7213	0.0185083	0.00482149	34.9362
O60234	GMFG	rs251906	G	0.0862332	-0.396104	1.72e-41	7213	0.0293563	0.0246192	182.01
O60243	HS6ST1	rs4662790	A	0.413905	0.251496	1.57e-51	7213	0.0166531	0.0306504	228.008
O60256	PRPSAP2	rs80251691	A	0.0691113	-0.190592	7.76e-09	7213	0.033011	0.00460017	33.3251
O60259	KLK8	rs10410942	C	0.0664772	-0.796823	3.64e-131	7213	0.0326981	0.076068	593.687
O60449	LY75	rs17231342	G	0.464509	0.870925	1e-200	7213	0.0288114	0.112439	913.509
O60462	NRP2	rs62172729	T	0.19042	-0.252313	7.75e-33	7213	0.0211401	0.0193667	142.411
O60469	DSCAM	rs78111814	C	0.046028	0.467451	6.48e-33	7213	0.0391167	0.0194141	142.767
O60476	MAN1A2	rs4659047	G	0.115278	-0.569835	2.85e-109	7213	0.0256586	0.0640019	493.076
O60486	PLXNC1	rs2291331	A	0.424373	-0.540059	1e-200	7213	0.0178659	0.112439	913.509
O60496	DOK2	rs17615788	T	0.429364	0.203088	7.16e-34	7213	0.01674	0.0199971	147.141
O60507	TPST1	rs313829	A	0.309303	-0.372838	5.86e-98	7213	0.0177497	0.0576446	441.102
O60551	NMT2	rs11259539	C	0.402814	-0.227925	5e-42	7213	0.0167792	0.0249433	184.467
O60565	GREM1	rs58658771	A	0.171981	0.937288	1e-200	7213	0.0310068	0.112439	913.509
O60575	SPINK4	rs1630171	G	0.154166	0.80272	1e-200	7213	0.0265551	0.112439	913.509
O60667	FAIM3	rs72758947	G	0.124012	-0.187416	1.01e-13	7213	0.0251917	0.00761486	55.3321
O60684	KPNA6	rs72666741	A	0.0282129	0.858735	7.97e-67	7213	0.0497253	0.0397057	298.156
O60701	UGDH	rs1138891	T	0.366699	-0.455336	2.53e-161	7213	0.0168237	0.0921934	732.322
O60704	TPST2	rs4275	G	0.424581	0.268985	1.14e-57	7213	0.0168041	0.0343044	256.156
O60760	HPGDS	rs10033662	G	0.372453	-0.571691	1e-200	7213	0.0189123	0.112439	913.509
O60909	B4GALT2	rs1859728	C	0.0505338	-0.982315	2.62e-154	7213	0.037121	0.0884924	700.07
O60911	CTSV	rs4743059	T	0.0754887	0.390775	1.13e-35	7213	0.0313447	0.0210935	155.383
O75015	FCGR3B	rs10800573	G	0.32483	0.462213	6.58e-156	7213	0.0173757	0.0893392	707.426
O75022	LILRB3	rs12978577	A	0.309511	0.523234	1.5e-200	7213	0.017317	0.11235	912.7
O75023	LILRB5	rs12975366	C	0.410717	-0.920434	1e-200	7213	0.0304492	0.112439	913.509
O75054	IGSF3	rs655735	A	0.404963	-0.204503	1.59e-34	7213	0.016688	0.020395	150.13
O75063	FAM20B	rs12568291	A	0.370512	0.166602	5.51e-22	7213	0.0172854	0.0127153	92.8708
O75077	ADAM23	rs1448903	G	0.0899764	0.857603	1e-200	7213	0.0283707	0.112439	913.509
O75096	LRP4	rs2306029	T	0.450229	0.459609	9.97e-171	7213	0.0165014	0.0971083	775.562
O75144	ICOSLG	rs2838537	G	0.351033	0.159332	4.8e-20	7213	0.0173783	0.0115197	84.0366
O75326	SEMA7A	rs78994380	A	0.113268	-0.179892	5.2e-12	7213	0.0260713	0.00655731	47.5969
O75340	PDCD6	rs56075848	C	0.0649522	0.234281	3.81e-12	7213	0.0337384	0.00664075	48.2065
O75354	ENTPD6	rs6050446	A	0.028005	-0.612944	3.48e-34	7213	0.0502792	0.0201879	148.574
O75356	ENTPD5	rs73301475	T	0.0565645	-1.25585	1e-200	7213	0.0415452	0.112439	913.509
O75382	TRIM3	rs2344827	G	0.167267	-0.149853	2.09e-11	7213	0.0223675	0.00618425	44.8721
O75436	VPS26A	rs35773981	C	0.225149	-0.487651	1.61e-136	7213	0.0196088	0.0789722	618.297
O75462	CRLF1	rs141412226	A	0.204423	0.337598	1.42e-61	7213	0.0203898	0.036615	274.066
O75473	LGR5	rs17109804	G	0.17004	0.156248	9.02e-13	7213	0.0218691	0.00702729	51.0324
O75493	CA11	rs62130341	T	0.100929	0.167622	7.31e-10	7213	0.0272148	0.00523189	37.9256
O75503	CLN5	rs17067027	T	0.0258561	-0.525036	2.97e-24	7213	0.0516733	0.014111	103.211
O75509	TNFRSF21	rs6458555	A	0.319908	0.286235	1.82e-60	7213	0.0174502	0.0359605	268.984
O75521	ECI2	rs7757606	A	0.307847	-0.445632	7.3e-142	7213	0.0175735	0.0818527	642.859
O75594	PGLYRP1	rs2072563	A	0.316235	-0.213745	6.66e-33	7213	0.0178898	0.0194068	142.712
O75629	CREG1	rs7513428	T	0.153542	0.334788	1.85e-47	7213	0.0231352	0.0282129	209.349
O75636	FCN3	rs111257457	A	0.0946901	-0.542905	1.53e-83	7213	0.0280357	0.0494195	374.891
O75828	CBR3	rs60376898	A	0.356648	-0.846144	1e-200	7213	0.0279916	0.112439	913.509
O75843	AP1G2	rs35309020	A	0.0900458	-0.446406	1.2e-52	7213	0.029233	0.031317	233.128
O75874	IDH1	rs3928183	T	0.0562873	-0.845273	2.84e-125	7213	0.0355055	0.072851	566.606
O75882	ATRN	rs118065662	G	0.0127547	-1.9218	6.48e-155	7213	0.0724793	0.0888137	702.859
O75973	C1QL1	rs7225162	C	0.47657	0.327862	1.64e-90	7213	0.0162513	0.0534134	406.898
O76003	GLRX3	rs12269149	T	0.283655	-0.126512	7.79e-12	7213	0.0184895	0.0064489	46.8049
O76036	NCR1	rs2915993	A	0.385138	-0.17854	7.19e-26	7213	0.0169758	0.0151037	110.583
O76074	PDE5A	rs58583086	A	0.37273	0.502202	5.88e-194	7213	0.0169041	0.109025	882.378
O76076	WISP2	rs6065746	G	0.445584	-0.348585	3.82e-98	7213	0.016579	0.0577497	441.956
O76096	CST7	rs4462848	C	0.226189	-0.561801	5.67e-187	7213	0.019264	0.105475	850.261
O94760	DDAH1	rs233071	T	0.366768	-0.124186	7.18e-13	7213	0.0173058	0.00708851	51.4802
O94766	B3GAT3	rs7122950	T	0.290309	-0.416871	2.12e-117	7213	0.0180979	0.0685178	530.426
O94779	CNTN5	rs4528296	C	0.0718148	0.731417	4.45e-119	7213	0.0315253	0.0694447	538.137
O94813	SLIT2	rs587668	C	0.297241	0.156569	9e-18	7213	0.0182352	0.0101171	73.7
O94856	NFASC	rs6663324	C	0.106474	0.823901	1e-200	7213	0.0272558	0.112439	913.509
O94907	DKK1	rs11003047	G	0.105435	0.570006	2.51e-100	7213	0.0268077	0.0589824	451.981
O94923	GLCE	rs3865014	G	0.226882	-0.831332	1e-200	7213	0.0275016	0.112439	913.509
O94929	ABLIM3	rs114464628	A	0.0341051	-0.311998	1.21e-11	7213	0.0460241	0.0063308	45.9423
O94933	SLITRK3	rs62282372	G	0.124151	-0.570619	7.54e-118	7213	0.0247247	0.068766	532.489
O94973	AP2A2	rs4963151	C	0.433384	-0.168879	4.72e-24	7213	0.0166952	0.0139873	102.293
O94985	CLSTN1	rs35331030	T	0.0167059	1.78296	9.77e-180	7213	0.0623698	0.101767	816.985
O94991	SLITRK5	rs12856670	T	0.291141	-0.22543	3.07e-35	7213	0.0181988	0.0208296	153.397
O94992	HEXIM1	rs12051846	G	0.25759	0.210601	2.06e-28	7213	0.0190493	0.0166629	122.192
O95149	SNUPN	rs7170787	A	0.250659	0.359476	7.95e-80	7213	0.0190008	0.0472769	357.831
O95150	TNFSF15	rs56339337	G	0.145155	-0.157907	1.79e-11	7213	0.0234904	0.00622579	45.1755
O95154	AKR7A3	rs55717136	T	0.373215	-0.483248	1.12e-181	7213	0.0168129	0.102765	825.909
O95185	UNC5C	rs1994292	T	0.349369	0.313902	3.79e-74	7213	0.0172314	0.0439844	331.764
O95236	APOL3	rs132642	A	0.165534	-1.06113	1e-200	7213	0.0351036	0.112439	913.509
O95256	IL18RAP	rs4851010	T	0.295577	0.290845	3.49e-57	7213	0.0182493	0.0340161	253.928
O95274	LYPD3	rs11666797	A	0.151047	-0.245002	9.82e-27	7213	0.0228903	0.0156343	114.529
O95336	PGLS	rs73020480	A	0.202482	0.4129	1.06e-92	7213	0.0202181	0.0546613	416.954
O95379	TNFAIP8	rs1032859	T	0.119437	-0.490494	6.18e-84	7213	0.0252683	0.049646	376.699
O95388	WISP1	rs60282000	G	0.354291	-0.292064	5.48e-63	7213	0.0174346	0.0374489	280.55
O95393	BMP10	rs34008398	A	0.00949674	-0.579365	1.22e-11	7213	0.0854795	0.0063286	45.9261
O95407	TNFRSF6B	rs8957	G	0.266325	0.151545	4.01e-16	7213	0.0186213	0.00909866	66.2129
O95445	APOM	rs805264	A	0.026272	-0.952002	1.99e-74	7213	0.0521584	0.0441471	333.048
O95460	MATN4	rs11906694	T	0.249965	-0.3569	1.1e-78	7213	0.0190042	0.046617	352.592
O95479	H6PD	rs34603401	C	0.15278	0.712904	1e-200	7213	0.0235838	0.112439	913.509
O95498	VNN2	rs9493425	G	0.343061	-0.739014	1e-200	7213	0.0244476	0.112439	913.509
O95502	NPTXR	rs3817727	T	0.0186469	1.62178	6.09e-159	7213	0.0603743	0.0909404	721.373
O95544	NADK	rs4648629	A	0.440663	-0.311603	2.4e-78	7213	0.016629	0.0464209	351.037
O95630	STAMBP	rs148932286	G	0.0142105	0.406138	4.81e-09	7213	0.0693824	0.00472796	34.2553
O95631	NTN1	rs9897200	T	0.114585	-0.664774	3.88e-146	7213	0.0258237	0.084144	662.509
O95633	FSTL3	rs3787004	C	0.474768	-0.138794	4.93e-17	7213	0.016546	0.00966098	70.345
O95711	LY86	rs977785	A	0.261472	-0.187434	4.2e-23	7213	0.0189344	0.0134034	97.9652
O95727	CRTAM	rs2370794	G	0.327118	0.307747	2.68e-67	7213	0.0177556	0.0399834	300.328
O95841	ANGPTL1	rs10913568	C	0.478442	0.435634	1.06e-158	7213	0.0162299	0.0908135	720.266
O95861	BPNT1	rs7530481	T	0.29225	0.23611	4.25e-38	7213	0.0182968	0.0225657	166.478
O95881	TXNDC12	rs6686632	C	0.0736864	-0.640626	6.24e-91	7213	0.0316793	0.0536528	408.825
O95897	OLFM2	rs62104305	A	0.33911	0.840317	1e-200	7213	0.0277988	0.112439	913.509
O95998	IL18BP	rs17884883	T	0.401983	0.10036	2.11e-09	7213	0.0167571	0.00494827	35.8594
O96013	PAK4	rs11667387	T	0.350132	-0.11375	8.17e-11	7213	0.0175069	0.0058188	42.205
P00167	CYB5A	rs6566789	A	0.280882	-0.147174	3.26e-15	7213	0.0186757	0.00853634	62.0855
P00325	ADH1B	rs1229984	T	0.0325107	-0.29095	4.39e-10	7213	0.0466304	0.0053684	38.9204
P00326	ADH1C	rs283415	C	0.434909	-0.542217	1e-200	7213	0.0179373	0.112439	913.509
P00338	LDHA	rs7112492	G	0.174962	0.190473	2.04e-18	7213	0.0217558	0.010515	76.6298
P00390	GSR	rs2551710	C	0.328851	-0.174943	1.15e-23	7213	0.0174457	0.0137495	100.53
P00450	CP	rs13089226	T	0.0432552	0.272277	2.2e-11	7213	0.0406864	0.00617049	44.7717
P00491	PNP	rs1049564	A	0.176279	-0.659672	1e-200	7213	0.0218228	0.112439	913.509
P00533	EGFR	rs75059484	T	0.141619	-0.251438	5.42e-26	7213	0.0238468	0.015179	111.143
P00568	AK1	rs78181560	T	0.0351449	-0.714771	1.3e-56	7213	0.045082	0.0336771	251.309
P00734	F2	rs1799963	A	0.0141411	1.07751	2.41e-53	7213	0.0700821	0.0317327	236.324
P00736	C1R	rs10849546	A	0.128795	-0.603834	7.81e-135	7213	0.0244342	0.0780598	610.548
P00738	HP	rs77303550	T	0.190836	0.680945	1e-200	7213	0.0225266	0.112439	913.509
P00742	F10	rs547138	T	0.396229	-0.286206	7.14e-65	7213	0.0168275	0.0385588	289.199
P00746	CFD	rs72984031	G	0.252946	-0.196222	2.12e-25	7213	0.0188405	0.0148154	108.44
P00749	PLAU	rs2633322	T	0.260641	0.413473	5.21e-110	7213	0.0185542	0.0644137	496.466
P00750	PLAT	rs77346091	C	0.0214197	-0.52766	2.13e-20	7213	0.0570097	0.0117373	85.6427
P00751	CFB	rs541862	C	0.0929572	0.816341	1.3e-190	7213	0.0277206	0.107328	866.998
P00797	REN	rs141995914	C	0.0116456	0.727601	5.08e-21	7213	0.0773425	0.012121	88.4768
P00915	CA1	rs116866430	G	0.00915015	-1.58931	5.22e-76	7213	0.0861417	0.0450658	340.306
P00995	SPINK1	rs6580502	T	0.396645	0.16339	2.47e-22	7213	0.0168091	0.0129298	94.4585
P01009	SERPINA1	rs28929474	T	0.0187855	-1.8065	1e-200	7213	0.0597615	0.112439	913.509
P01011	SERPINA3	rs17753556	A	0.189172	-0.525621	1.55e-139	7213	0.0209025	0.0806005	632.163
P01019	AGT	rs2071404	A	0.105435	0.458801	4.22e-66	7213	0.0267162	0.0392807	294.835
P01023	A2M	rs226393	T	0.351795	-0.161404	8.53e-21	7213	0.0172572	0.0119823	87.4519
P01024	C3	rs2230199	C	0.201442	0.225902	3.94e-28	7213	0.0205417	0.0164904	120.906
P01031	C5	rs1035029	G	0.398586	-0.227462	2.72e-41	7213	0.0169002	0.024499	181.099
P01034	CST3	rs2405367	A	0.203799	-0.612633	1e-200	7213	0.0202667	0.112439	913.509
P01036	CST4	rs7263473	A	0.103078	-0.458975	9.06e-64	7213	0.0272249	0.0379094	284.136
P01037	CST1	rs4260306	T	0.282961	-0.506384	1.24e-172	7213	0.0180789	0.0980976	784.322
P01042	KNG1	rs76438938	T	0.0273118	-1.51067	1e-200	7213	0.049975	0.112439	913.509
P01133	EGF	rs10029654	A	0.332525	0.383437	2.31e-108	7213	0.017339	0.0634944	488.9
P01178	OXT	rs2875830	T	0.292666	-0.368173	8.88e-96	7213	0.01773	0.0564095	431.086
P01210	PENK	rs2576581	A	0.464716	-0.535131	1e-200	7213	0.0177029	0.112439	913.509
P01229	LHB	rs3795050	C	0.0775683	-0.546216	6.22e-71	7213	0.030674	0.0421103	317.007
P01589	IL2RA	rs12722497	A	0.0954527	0.228191	1.09e-15	7213	0.028466	0.00883034	64.2429
P01730	CD4	rs73053728	G	0.305698	-0.148931	7.42e-17	7213	0.0178571	0.00955131	69.5387
P01732	CD8A	rs3020726	G	0.165604	0.510069	1.15e-117	7213	0.0221186	0.0686647	531.646
P01833	PIGR	rs6540730	C	0.465063	-0.205398	6.49e-35	7213	0.0166626	0.0206318	151.91
P01857	IGHG1 IGHG2 IGHG3 IGHG4 IGK@ IGL@	rs11621145	G	0.328435	-0.178848	1.33e-23	7213	0.0178607	0.0137106	100.242
P01906	HLA-DQA2	rs9272014	A	0.277346	-0.616609	1e-200	7213	0.0203983	0.112439	913.509
P02008	HBZ	rs2461286	A	0.346527	0.694949	1e-200	7213	0.0229899	0.112439	913.509
P02458	COL2A1	rs719008	T	0.390683	-0.449708	6.96e-158	7213	0.0167981	0.0903826	716.509
P02649	APOE	rs35136575	G	0.232843	-0.134428	6.51e-12	7213	0.019573	0.00649705	47.1566
P02649	APOE	rs429358	C	0.14973	0.299981	8.7e-38	7213	0.0233464	0.022377	165.054
P02654	APOC1	rs5112	C	0.466449	-0.307528	1.24e-77	7213	0.0164886	0.0460078	347.762
P02656	APOC3	rs5141	T	0.092264	0.198931	4.02e-12	7213	0.028679	0.00662635	48.1014
P02679	FGG	rs2227399	G	0.209344	0.218955	4.97e-27	7213	0.0203372	0.0158156	115.879
P02741	CRP	rs2794520	T	0.325177	-0.273903	9.31e-55	7213	0.0175756	0.0325743	242.803
P02743	APCS	rs77672383	T	0.0237765	-0.919614	3.65e-65	7213	0.0539443	0.0387302	290.536
P02747	C1QC	rs75380810	C	0.0395813	0.962427	9.54e-115	7213	0.0422712	0.0670485	518.234
P02748	C9	rs696766	A	0.0549009	0.463091	2.06e-37	7213	0.0362292	0.0221499	163.341
P02749	APOH	rs1801689	C	0.032788	-1.53413	1e-200	7213	0.0507511	0.112439	913.509
P02751	FN1	rs1250258	C	0.266602	-0.285448	2.15e-52	7213	0.0187393	0.0311659	231.967
P02753	RBP4	rs10882283	C	0.385138	-0.18099	5.26e-26	7213	0.0171608	0.015187	111.203
P02760	AMBP	rs10982050	G	0.242132	-0.150718	4.82e-15	7213	0.019245	0.00843139	61.3157
P02765	AHSG	rs2518134	C	0.357133	-0.517787	1e-200	7213	0.0171291	0.112439	913.509
P02771	AFP	rs667	T	0.237141	-0.129298	3.65e-11	7213	0.0195384	0.00603477	43.7809
P02774	GC	rs7697091	C	0.360876	-0.160771	1.03e-20	7213	0.0172262	0.0119318	87.0791
P02776	PF4	rs3756074	C	0.0461666	-0.455359	2.31e-30	7213	0.039764	0.0178561	131.101
P02778	CXCL10	rs151000561	T	0.0110911	0.471447	2.8e-09	7213	0.0793293	0.00487261	35.3084
P02786	TFRC	rs62282694	T	0.245598	-0.111702	7.17e-09	7213	0.0193026	0.00462129	33.4789
P02787	TF	rs8177245	G	0.335505	0.171696	1.41e-22	7213	0.0175608	0.0130797	95.568
P03950	ANG	rs4982325	T	0.117219	0.831794	1e-200	7213	0.0275169	0.112439	913.509
P03951	F11	rs2289252	T	0.410786	0.418577	1.66e-139	7213	0.0166475	0.0805844	632.026
P03952	KLKB1	rs4253304	C	0.420006	0.36051	3.53e-105	7213	0.0165517	0.0617117	474.271
P03956	MMP1	rs1144396	C	0.499237	-0.309328	4.22e-79	7213	0.0164267	0.0468577	354.502
P03973	SLPI	rs6104034	G	0.47858	-0.224728	7.23e-42	7213	0.0165769	0.0248466	183.734
P04003	C4BPA	rs11120218	A	0.130459	0.776306	1e-200	7213	0.0256813	0.112439	913.509
P04040	CAT	rs4756148	T	0.229031	-0.349438	1.26e-70	7213	0.0196672	0.0419312	315.6
P04070	PROC	rs1799809	G	0.430473	-0.231169	5.25e-43	7213	0.016815	0.0255339	188.95
P04083	ANXA1	rs2795108	C	0.127755	0.255113	5.3e-25	7213	0.0247026	0.014571	106.625
P04118	CLPS	rs9380535	T	0.395744	-0.415573	7.11e-135	7213	0.0168136	0.0780819	610.736
P04155	TFF1	rs3761376	A	0.239914	-0.365113	1.1e-77	7213	0.0195694	0.046038	348.001
P04196	HRG	rs7617554	T	0.464924	0.736658	1e-200	7213	0.0243696	0.112439	913.509
P04217	A1BG	rs1268538	T	0.047553	-1.12335	4.54e-191	7213	0.0380996	0.10756	869.099
P04264	KRT1	rs117006546	T	0.0328573	0.30971	3.33e-11	7213	0.0467051	0.00605936	43.9604
P04278	SHBG	rs11651783	T	0.214751	-0.306614	7.83e-52	7213	0.0202414	0.0308308	229.393
P04424	ASL	rs28412533	G	0.161237	0.21655	2.09e-22	7213	0.0222392	0.0129745	94.789
P04745	AMY1A	rs78811372	A	0.0396506	-0.712255	8.61e-63	7213	0.0425861	0.0373332	279.65
P04746	AMY2A	rs12076610	T	0.093789	0.689138	1.47e-133	7213	0.0280208	0.0773687	604.69
P04792	HSPB1	rs2868371	G	0.246846	-0.849624	1e-200	7213	0.0281067	0.112439	913.509
P04843	RPN1	rs9880064	A	0.385692	0.418723	2.65e-137	7213	0.0167883	0.0793957	621.899
P05060	CHGB	rs36054946	C	0.0177457	-0.410316	8.92e-11	7213	0.0632793	0.00579527	42.0333
P05067	APP	rs455047	C	0.441772	0.16472	5.68e-23	7213	0.0166909	0.0133228	97.3676
P05121	SERPINE1	rs2227631	G	0.410439	-0.185799	3.09e-28	7213	0.0168615	0.016555	121.388
P05154	SERPINA5	rs10133793	C	0.331	0.155602	9.69e-19	7213	0.0176048	0.0107146	78.0997
P05155	SERPING1	rs10896631	C	0.270484	-0.9075	1e-200	7213	0.0300213	0.112439	913.509
P05156	CFI	rs13117504	G	0.417787	0.386073	5.31e-120	7213	0.0165752	0.0699539	542.379
P05160	F13B	rs1332668	T	0.470054	-0.504522	1e-200	7213	0.0166903	0.112439	913.509
P05161	ISG15	rs3128111	G	0.382227	0.307143	4.97e-73	7213	0.0169922	0.0433337	326.633
P05162	LGALS2	rs2235338	G	0.412796	0.290398	2.59e-67	7213	0.0167528	0.0399921	300.396
P05164	MPO	rs75394768	A	0.0628726	-0.523014	3.75e-54	7213	0.0337537	0.0322141	240.028
P05187	ALPP	rs35458538	A	0.23728	0.393209	1.95e-92	7213	0.0192821	0.0545106	415.738
P05362	ICAM1	rs5498	G	0.421669	-1.04398	1e-200	7213	0.0345363	0.112439	913.509
P05451	REG1A	rs11126696	A	0.384167	-0.294665	7.85e-67	7213	0.0170618	0.0397096	298.186
P05452	CLEC3B	rs10865936	A	0.216484	-0.356188	4.79e-72	7213	0.0198432	0.0427601	322.117
P05546	SERPIND1	rs73160986	C	0.11202	0.150383	1e-08	7213	0.0262415	0.00453243	32.8321
P05771	PRKCB	rs2023671	G	0.25149	0.29896	1.71e-56	7213	0.0188765	0.0336064	250.763
P06132	UROD	rs2236576	A	0.248371	-0.796385	1e-200	7213	0.0263455	0.112439	913.509
P06213	INSR	rs3745545	C	0.154651	-0.139215	1.42e-09	7213	0.0229986	0.00505421	36.631
P06241	FYN	rs9487731	C	0.183627	-0.142789	2.68e-11	7213	0.0214296	0.00611758	44.3854
P06276	BCHE	rs62295996	A	0.203106	-0.438648	2.63e-104	7213	0.0202248	0.0612222	470.264
P06396	GSN	rs78573713	C	0.0097047	-1.0449	2.62e-35	7213	0.0842675	0.0208715	153.712
P06681	C2	rs115204832	G	0.0116456	-1.2924	9.53e-63	7213	0.0773013	0.0373072	279.448
P06702	S100A9	rs724781	G	0.266325	-0.154398	2.26e-16	7213	0.018812	0.00925252	67.343
P06703	S100A6	rs60969679	A	0.0388881	0.518715	3.08e-34	7213	0.042515	0.0202202	148.817
P06727	APOA4	rs12721043	A	0.0113684	-1.19031	3.95e-52	7213	0.0783472	0.0310082	230.756
P06734	FCER2	rs62110713	T	0.241924	-0.364279	2.14e-78	7213	0.0194337	0.0464497	351.265
P06737	PYGL	rs12717412	A	0.37474	-0.302739	1.57e-70	7213	0.0170507	0.0418754	315.161
P07093	SERPINE2	rs13412535	A	0.234784	-0.92683	1e-200	7213	0.0306608	0.112439	913.509
P07108	DBI	rs6714264	C	0.193609	-0.529076	6.7e-146	7213	0.0205693	0.0840171	661.418
P07148	FABP1	rs2241883	C	0.337793	-0.282662	1.2e-59	7213	0.017354	0.035476	265.227
P07203	GPX1	rs9823546	A	0.291834	-0.16557	1.29e-19	7213	0.0182724	0.0112549	82.0829
P07225	PROS1	rs9826711	C	0.0251629	-0.439497	1.05e-16	7213	0.0529579	0.00945818	68.8541
P07237	P4HB	rs56112103	A	0.478026	-0.198497	3.28e-33	7213	0.0165323	0.0195944	144.119
P07306	ASGR1	rs62061425	G	0.193054	-0.243888	4.21e-31	7213	0.0210282	0.0183079	134.48
P07327	ADH1A	rs28364331	G	0.0144184	-1.42062	3.14e-94	7213	0.068984	0.0555305	423.974
P07333	CSF1R	rs572474264	A	0.0137252	-0.887257	2.95e-36	7213	0.0705651	0.021448	158.051
P07355	ANXA2	rs8033800	T	0.386178	0.397233	3.35e-122	7213	0.0168975	0.0711651	552.49
P07359	GP1BA	rs1060431	A	0.0783308	0.368647	4.61e-33	7213	0.0307759	0.0195042	143.443
P07360	C8G	rs7862602	G	0.465132	0.497576	1e-200	7213	0.0164605	0.112439	913.509
P07451	CA3	rs1543852	A	0.387218	-0.288002	2.77e-64	7213	0.0170128	0.0382124	286.497
P07477	PRSS1	rs62473563	T	0.0876889	0.229115	3.29e-15	7213	0.0290778	0.00853388	62.0675
P07478	PRSS2	rs1799886	C	0.430265	0.390392	1.67e-123	7213	0.0165173	0.0718806	558.475
P07585	DCN	rs3138190	G	0.0655067	-0.227633	1.6e-11	7213	0.0337808	0.00625588	45.3952
P07602	PSAP	rs4747200	G	0.279911	0.222778	1.35e-33	7213	0.0184421	0.0198293	145.882
P07686	HEXB	rs13164140	A	0.247193	0.46273	7.39e-132	7213	0.0189377	0.0764446	596.87
P07738	BPGM	rs4732044	A	0.486621	0.112028	2.6e-11	7213	0.0168018	0.00612571	44.4447
P07741	APRT	rs535070	G	0.34015	-0.110548	3.23e-10	7213	0.0175827	0.00545056	39.5194
P07858	CTSB	rs709821	C	0.259185	0.73774	1e-200	7213	0.0244054	0.112439	913.509
P07948	LYN	rs1050855	A	0.490226	-0.146682	1.26e-18	7213	0.0166509	0.0106442	77.5811
P07949	RET	rs2506008	C	0.254263	-0.509789	1.51e-163	7213	0.0187054	0.0933606	742.548
P07954	FH	rs10926507	A	0.289408	-0.188048	4.05e-24	7213	0.0185627	0.0140282	102.596
P07988	SFTPB	rs1130866	G	0.481492	0.516735	1e-200	7213	0.0170943	0.112439	913.509
P07998	RNASE1	rs17254387	G	0.313392	-0.423488	6.06e-128	7213	0.0175989	0.074312	578.881
P08069	IGF1R	rs7162314	G	0.206849	0.239139	9.71e-32	7213	0.020399	0.0186969	137.392
P08118	MSMB	rs2446707	T	0.406488	-0.438995	1.68e-151	7213	0.0167444	0.0870031	687.165
P08134	RHOC	rs7415820	G	0.475461	0.220126	8.11e-40	7213	0.0166687	0.0236073	174.348
P08174	CD55	rs11584921	G	0.241924	-0.796334	1e-200	7213	0.0263438	0.112439	913.509
P08217	CELA2A	rs2473355	G	0.38389	-0.112078	4.5e-11	7213	0.0170161	0.00597865	43.3713
P08236	GUSB	rs2949690	T	0.445515	-0.177169	1.57e-26	7213	0.0166204	0.0155092	113.599
P08237	PFKM	rs3742074	T	0.168099	0.143149	1.82e-10	7213	0.0224519	0.0056042	40.6397
P08246	ELANE	rs56283881	T	0.247331	-0.238824	1.21e-36	7213	0.0188886	0.0216831	159.822
P08253	MMP2	rs243837	T	0.38902	-0.11658	7.2e-12	7213	0.01701	0.00647003	46.9592
P08263	GSTA1	rs4715316	C	0.356301	-0.762353	1e-200	7213	0.0252197	0.112439	913.509
P08294	SOD3	rs1799895	G	0.0102593	1.81962	4.52e-110	7213	0.0816303	0.0644481	496.75
P08319	ADH4	rs6858148	C	0.364758	-0.431801	9.01e-144	7213	0.0169131	0.0828772	651.633
P08397	HMBS	rs72995454	T	0.0275198	0.448389	2.03e-18	7213	0.0512116	0.0105164	76.6395
P08476	INHBA	rs1122291	T	0.243796	-0.112634	6.65e-09	7213	0.0194212	0.00464141	33.6253
P08493	MGP	rs2900342	G	0.384791	-0.428371	8.02e-145	7213	0.0167169	0.0834401	656.462
P08567	PLEK	rs1867312	C	0.432414	-0.443531	3.92e-159	7213	0.0165013	0.0910412	722.253
P08571	CD14	rs5744441	A	0.237627	-0.309891	2.25e-59	7213	0.0190707	0.0353145	263.975
P08581	MET	rs41748	G	0.444267	-0.195354	1.21e-31	7213	0.0166906	0.0186385	136.955
P08603	CFH	rs1048663	A	0.162138	-0.601286	2.6e-167	7213	0.02181	0.0953291	759.854
P08637	FCGR3A	rs396991	C	0.327672	0.969359	1e-200	7213	0.0320677	0.112439	913.509
P08670	VIM	rs359276	A	0.293775	-0.111299	9.16e-10	7213	0.018176	0.00517151	37.4856
P08697	SERPINF2	rs11078596	T	0.183211	-0.349685	1.27e-59	7213	0.0214734	0.0354615	265.114
P08709	F7	rs6046	A	0.107376	-1.29858	1e-200	7213	0.0429588	0.112439	913.509
P08887	IL6R	rs4129267	T	0.396437	1.04115	1e-200	7213	0.0344427	0.112439	913.509
P08949	NMB	rs35127183	A	0.34424	-0.238447	2.36e-43	7213	0.0172718	0.0257433	190.54
P09038	FGF2	rs308403	T	0.327672	-0.221641	2.34e-36	7213	0.0176019	0.0215091	158.512
P09104	ENO2	rs2886400	T	0.284625	0.196188	1.96e-26	7213	0.0184403	0.0154501	113.159
P09110	ACAA1	rs2229528	G	0.0438791	-0.714983	2.92e-71	7213	0.0400563	0.042302	318.514
P09211	GSTP1	rs1695	G	0.33807	-0.582943	1e-200	7213	0.0192845	0.112439	913.509
P09228	CST2	rs4260306	T	0.282961	-0.512363	6.4e-177	7213	0.0180667	0.100316	804.036
P09237	MMP7	rs11568819	A	0.0620408	0.795426	6.69e-124	7213	0.0335992	0.0720987	560.301
P09238	MMP10	rs17860955	C	0.0173991	-1.07655	2.56e-65	7213	0.0630735	0.0388207	291.242
P09326	CD48	rs352684	A	0.423679	-0.353888	9.17e-101	7213	0.0166067	0.0592291	453.99
P09341	CXCL1	rs1366946	C	0.215652	0.626211	1e-200	7213	0.0207159	0.112439	913.509
P09417	QDPR	rs7661303	T	0.237834	-0.739172	1e-200	7213	0.0244528	0.112439	913.509
P09455	RBP1	rs2071387	G	0.181547	0.20106	5.64e-21	7213	0.0213973	0.012093	88.27
P09467	FBP1	rs2987899	A	0.0650908	-0.461261	6.33e-43	7213	0.0335847	0.0254849	188.578
P09486	SPARC	rs59311424	A	0.0311244	-0.386049	6.92e-16	7213	0.0478262	0.00895226	65.1379
P09488	GSTM1	rs115929572	A	0.0751421	0.767389	2.21e-136	7213	0.030873	0.0788978	617.665
P09525	ANXA4	rs2228203	T	0.196659	-0.51625	1.89e-140	7213	0.020462	0.0810926	636.363
P09529	INHBB	rs17050272	A	0.425828	0.421393	2.04e-145	7213	0.0164104	0.0837584	659.195
P09543	CNP	rs4432296	C	0.263205	-0.284189	1.3e-52	7213	0.0186165	0.0312962	232.968
P09619	PDGFRB	rs2304058	C	0.455913	-1.048	1e-200	7213	0.0346693	0.112439	913.509
P09622	DLD	rs3735602	A	0.420907	-0.0968738	1.1e-08	7213	0.0169522	0.00450697	32.6469
P09668	CTSH	rs2289702	T	0.104048	-1.26725	1e-200	7213	0.0419223	0.112439	913.509
P09848	LCT	rs191079	C	0.281922	-0.80806	1e-200	7213	0.0267317	0.112439	913.509
P09871	C1S	rs12146727	A	0.128587	-1.05667	1e-200	7213	0.0349561	0.112439	913.509
P09960	LTA4H	rs2247570	C	0.312422	0.154682	7e-18	7213	0.0179552	0.0101845	74.196
P09972	ALDOC	rs141921160	T	0.0101206	-0.841634	2.58e-24	7213	0.0827208	0.0141486	103.49
P0C6S8	LINGO3	rs117849041	T	0.106336	-0.166257	7.8e-10	7213	0.0270383	0.00521452	37.799
P0C862	C1QTNF9	rs56069023	G	0.3136	-0.341222	1.65e-82	7213	0.0177333	0.0488249	370.149
P0C8F1	PATE4	rs665677	A	0.29225	0.277842	3.55e-53	7213	0.0181006	0.0316324	235.553
P0CG30	GSTT2B	rs5751777	C	0.4094	0.146477	6e-18	7213	0.016968	0.0102258	74.5002
P0DJI8	SAA1	rs11024589	C	0.104741	-0.798865	1e-200	7213	0.0264275	0.112439	913.509
P0DJI9	SAA2	rs11024589	C	0.104741	-0.578967	5.77e-105	7213	0.0266091	0.061592	473.29
P0DMM9	SULT1A3	rs148788997	C	0.118883	0.185788	6.31e-13	7213	0.0258268	0.00712317	51.7337
P0DMV8	HSPA1A	rs74434374	A	0.054069	-0.260579	8.77e-13	7213	0.036452	0.00703483	51.0876
P10082	PYY	rs12449853	C	0.196312	0.138133	3.48e-11	7213	0.0208513	0.00604755	43.8742
P10092	CALCB	rs11023416	G	0.274643	-0.300296	1.98e-58	7213	0.0186338	0.0347551	259.643
P10124	SRGN	rs2229498	G	0.157771	-0.50051	3.53e-110	7213	0.0224423	0.064508	497.243
P10147	CCL3	rs2015086	G	0.138639	0.609656	2.97e-147	7213	0.0235914	0.0847404	667.639
P10153	RNASE2	rs2233859	A	0.426244	0.304277	7.03e-77	7213	0.016396	0.045571	344.303
P10253	GAA	rs2304849	C	0.251074	-0.376537	6.5e-89	7213	0.0188346	0.0525006	399.559
P10451	SPP1	rs1471400	A	0.358173	-0.102178	4.44e-09	7213	0.017416	0.00474936	34.4111
P10619	CTSA	rs191805	T	0.367947	0.22453	3.92e-39	7213	0.017157	0.023193	171.216
P10643	C7	rs74480769	G	0.0340358	-1.50019	1e-200	7213	0.0496283	0.112439	913.509
P10645	CHGA	rs729940	T	0.145155	-0.326871	2.29e-44	7213	0.0233937	0.0263537	195.18
P10646	TFPI	rs116011690	T	0.0219742	-0.557414	1.1e-22	7213	0.0568654	0.0131461	96.0594
P10696	ALPPL2	rs35458538	A	0.23728	0.325131	3.18e-63	7213	0.0193711	0.0375882	281.634
P10720	PF4V1	rs872914	G	0.290101	0.122594	2.11e-11	7213	0.0183025	0.00618169	44.8535
P10746	UROS	rs1935451	G	0.085332	0.270185	1.34e-19	7213	0.0298314	0.0112447	82.0078
P10768	ESD	rs9778	T	0.100028	-0.843938	1e-200	7213	0.0279186	0.112439	913.509
P10912	GHR	rs4866942	T	0.463053	0.338674	7.29e-94	7213	0.0164784	0.0553226	422.294
P10915	HAPLN1	rs6886442	C	0.249064	-0.172545	2.52e-19	7213	0.0191975	0.0110755	80.7599
P11171	EPB41	rs204074	C	0.0716068	-0.295365	3.44e-20	7213	0.03209	0.0116089	84.6951
P11226	MBL2	rs7899547	T	0.347983	-0.775361	1e-200	7213	0.02565	0.112439	913.509
P11310	ACADM	rs7534754	A	0.304242	0.316964	4.61e-71	7213	0.0177831	0.0421863	317.604
P11362	FGFR1	rs11997244	T	0.453625	-0.148486	5.38e-19	7213	0.0166761	0.0108723	79.2618
P11464	PSG1	rs2005772	G	0.200957	-0.142168	2.71e-12	7213	0.020333	0.00673214	48.8745
P11586	MTHFD1	rs10146204	A	0.415985	-0.189337	6.03e-29	7213	0.0169577	0.0169895	124.629
P11717	IGF2R	rs2282140	T	0.135311	0.870276	1e-200	7213	0.0287899	0.112439	913.509
P11766	ADH5	rs28730611	C	0.0381949	-0.980676	2e-115	7213	0.0429438	0.0674247	521.352
P12081	HARS	rs112352450	A	0.0196867	0.463388	1.37e-14	7213	0.0601871	0.00815103	59.2601
P12104	FABP2	rs1799883	T	0.263344	-0.922963	1e-200	7213	0.0305329	0.112439	913.509
P12109	COL6A1	rs1053312	A	0.307084	-1.07583	1e-200	7213	0.0355899	0.112439	913.509
P12110	COL6A2	rs35548026	A	0.0869957	-0.548396	1.01e-78	7213	0.029194	0.0466385	352.762
P12111	COL6A3	rs1050785	C	0.401705	-0.220663	5.2e-39	7213	0.0168893	0.0231187	170.654
P12259	F5	rs61808983	T	0.0490087	-0.831266	1.14e-107	7213	0.0377128	0.0631068	485.715
P12273	PIP	rs73170678	T	0.132816	0.580026	9.64e-132	7213	0.0237487	0.0763819	596.339
P12318	FCGR2A	rs1801274	A	0.49792	-0.989651	1e-200	7213	0.032739	0.112439	913.509
P12532	CKMT1A	rs2614819	A	0.0986413	-0.260674	2.51e-21	7213	0.0274933	0.0123097	89.8712
P12544	GZMA	rs4865901	G	0.265354	0.111919	2.75e-09	7213	0.018823	0.00487743	35.3435
P12724	RNASE3	rs147307766	T	0.0497019	0.946463	1.07e-141	7213	0.0373459	0.0817634	642.096
P12814	ACTN1	rs76640185	C	0.0345903	-0.36557	8.32e-16	7213	0.0454158	0.00890282	64.7749
P12821	ACE	rs4353	G	0.47144	-0.744398	1e-200	7213	0.0246257	0.112439	913.509
P12872	MLN	rs9394169	A	0.466657	0.383215	5.55e-122	7213	0.0163161	0.0710446	551.482
P13385	TDGF1	rs80045772	A	0.259254	1.13312	1e-200	7213	0.0374851	0.112439	913.509
P13497	BMP1	rs1126931	T	0.16907	-0.198104	3.33e-19	7213	0.0221167	0.0110008	80.2093
P13501	CCL5	rs2107538	T	0.178844	-0.612013	1.1e-183	7213	0.0211748	0.103794	835.142
P13591	NCAM1	rs2288158	G	0.134063	0.459764	4.02e-80	7213	0.0242556	0.047448	359.19
P13647	KRT5	rs636676	C	0.277138	-0.134218	6.5e-13	7213	0.0186685	0.00711521	51.6755
P13671	C6	rs191791682	C	0.0120616	-1.52568	1.66e-91	7213	0.0752032	0.0539807	411.466
P13686	ACP5	rs2305799	T	0.122279	-0.444933	7.56e-71	7213	0.0250015	0.0420608	316.618
P13693	TPT1	rs2234222	C	0.0489394	0.274344	4.28e-13	7213	0.0378594	0.00722734	52.4957
P13716	ALAD	rs1800435	G	0.0797865	-0.67226	2.31e-109	7213	0.0302577	0.0640528	493.495
P13796	LCP1	rs12858505	A	0.218494	-0.16006	2.38e-15	7213	0.0202102	0.00862077	62.705
P13929	ENO3	rs238238	A	0.292597	0.359933	2.33e-89	7213	0.0179582	0.0527552	401.605
P13942	COL11A2	rs3129205	T	0.348329	0.381714	7.99e-111	7213	0.0170649	0.0648676	500.208
P13987	CD59	rs831630	T	0.309025	-0.394336	4.17e-112	7213	0.0175262	0.0655817	506.1
P14151	SELL	rs4987353	A	0.31062	-0.583599	1e-200	7213	0.0193062	0.112439	913.509
P14174	MIF	rs2330634	C	0.402745	0.274135	7.72e-60	7213	0.0168026	0.0355894	266.106
P14207	FOLR2	rs75608470	T	0.0249549	0.393716	1.14e-13	7213	0.0530359	0.00758237	55.0942
P14210	HGF	rs5745695	G	0.240191	-0.240622	4.22e-35	7213	0.0194654	0.0207455	152.765
P14314	PRKCSH	rs11557488	A	0.204631	0.287358	1.92e-45	7213	0.0203108	0.0270016	200.112
P14384	CPM	rs8181716	T	0.179884	-0.221862	1.27e-24	7213	0.0216595	0.0143378	104.894
P14415	ATP1B2	rs1642762	C	0.430958	0.431073	7.68e-152	7213	0.0164235	0.0871838	688.728
P14543	NID1	rs2734807	T	0.397962	-0.226066	1.5e-41	7213	0.0167418	0.0246551	182.282
P14550	AKR1A1	rs2229540	G	0.0614862	-1.41296	1e-200	7213	0.0467426	0.112439	913.509
P14555	PLA2G2A	rs11573156	C	0.23929	0.813111	1e-200	7213	0.0268988	0.112439	913.509
P14598	NCF1	rs1384976112	A	0.0396506	1.09623	3.29e-158	7213	0.0409051	0.0905542	718.005
P14621	ACYP2	rs11125524	C	0.494246	0.383966	1.02e-122	7213	0.0162982	0.071449	554.863
P14625	HSP90B1	rs2722192	C	0.303757	1.06302	1e-200	7213	0.0351661	0.112439	913.509
P14778	IL1R1	rs2287047	A	0.299875	-0.230468	2.11e-37	7213	0.0180329	0.0221436	163.293
P14780	MMP9	rs8113877	G	0.396229	0.276869	1.11e-60	7213	0.0168483	0.0360875	269.969
P14784	IL2RB	rs228953	A	0.437335	0.154667	1.59e-20	7213	0.0166545	0.0118156	86.2207
P14868	DARS	rs2304371	G	0.170872	0.418086	1.06e-84	7213	0.0214383	0.0500861	380.214
P15086	CPB1	rs13318851	C	0.227506	0.409447	3.24e-98	7213	0.0194664	0.0577902	442.285
P15090	FABP4	rs1486006	C	0.183072	-0.172477	2.26e-15	7213	0.0217604	0.00863466	62.8068
P15104	GLUL	rs61805076	C	0.332247	0.11505	9.54e-11	7213	0.0177709	0.00577726	41.9019
P15121	AKR1B1	rs782546	T	0.0304312	0.645917	6.93e-41	7213	0.0482392	0.0242535	179.239
P15144	ANPEP	rs1042499	C	0.0594759	0.21923	5.3e-10	7213	0.035303	0.00531796	38.5528
P15248	IL9	rs1799962	C	0.0719534	-0.181859	2.04e-08	7213	0.0324252	0.00434209	31.4474
P15259	PGAM2	rs6956492	G	0.234992	-0.129707	3.76e-11	7213	0.0196132	0.00602681	43.7228
P15291	B4GALT1	rs7019909	T	0.100444	0.630544	4.11e-121	7213	0.0269444	0.0705661	547.486
P15309	ACPP	rs61793793	A	0.0532372	0.225928	1.2e-09	7213	0.0371577	0.00509924	36.9591
P15498	VAV1	rs36097961	T	0.0765285	-0.580725	7.99e-80	7213	0.0306957	0.0472756	357.821
P15516	HTN3	rs78169960	G	0.0127547	-0.697929	6.86e-21	7213	0.0744388	0.0120406	87.8828
P15529	CD46	rs2488252	C	0.410024	0.593582	1e-200	7213	0.0196365	0.112439	913.509
P15559	NQO1	rs57488237	C	0.188618	-0.790558	1e-200	7213	0.0261527	0.112439	913.509
P15586	GNS	rs1690278	G	0.473659	-0.109823	7.43e-11	7213	0.0168655	0.00584425	42.3906
P15692	VEGFA	rs6921438	A	0.478719	-0.216499	2.67e-38	7213	0.0167308	0.0226881	167.402
P15814	IGLL1	rs9624216	A	0.087273	-0.5173	5.89e-71	7213	0.0290452	0.0421241	317.115
P15848	ARSB	rs11743362	A	0.436434	-0.262654	1.01e-55	7213	0.0167023	0.0331481	247.226
P16035	TIMP2	rs11077399	A	0.295647	-0.128605	1.49e-12	7213	0.0181763	0.00689262	50.0476
P16083	NQO2	rs6596928	T	0.325038	-0.645136	1e-200	7213	0.021342	0.112439	913.509
P16109	SELP	rs6136	G	0.10793	-0.643764	6.7e-134	7213	0.0261419	0.0775538	606.258
P16112	ACAN	rs34949187	A	0.172397	-0.219758	5.68e-24	7213	0.0217641	0.0139379	101.927
P16152	CBR1	rs16993864	A	0.0188548	-1.4996	6.08e-141	7213	0.0593323	0.0813577	638.628
P16234	PDGFRA	rs35597368	C	0.109871	-0.282808	1.25e-26	7213	0.0264778	0.01557	114.051
P16435	POR	rs59882870	A	0.156246	0.172892	2.47e-14	7213	0.022679	0.00799284	58.1007
P16442	ABO	rs8176632	T	0.137391	1.11785	1e-200	7213	0.03698	0.112439	913.509
P16444	DPEP1	rs409170	A	0.40025	-0.526387	1e-200	7213	0.0174136	0.112439	913.509
P16519	PCSK2	rs6044716	T	0.494246	-0.131171	2.51e-15	7213	0.0165764	0.0086065	62.6002
P16562	CRISP2	rs555247	A	0.444059	0.502713	1e-200	7213	0.0166304	0.112439	913.509
P16581	SELE	rs4987388	A	0.279842	0.156461	1.3e-17	7213	0.018313	0.0100185	72.9744
P16591	FER	rs71592765	G	0.0849854	0.367916	7.39e-36	7213	0.0294314	0.0212056	156.227
P16619	CCL3L1	rs1102934	G	0.140233	0.464274	2.26e-85	7213	0.0237108	0.0504716	383.297
P16860	NPPB	rs198379	C	0.424026	0.204607	1.47e-33	7213	0.0169477	0.0198068	145.713
P16871	IL7R	rs10058572	G	0.404617	0.147757	1.81e-18	7213	0.0168508	0.0105471	76.866
P16885	PLCG2	rs62045706	A	0.204353	0.280027	5.91e-43	7213	0.0203816	0.0255029	188.714
P16930	FAH	rs11555096	T	0.0213503	-1.65648	9.54e-193	7213	0.0559336	0.108412	876.813
P16949	STMN1	rs807060	G	0.430611	-0.0984897	4.59e-09	7213	0.0168031	0.00474048	34.3464
P17181	IFNAR1	rs2257167	C	0.138985	-0.998563	1e-200	7213	0.0330338	0.112439	913.509
P17213	BPI	rs6127742	A	0.100097	-0.749556	1.38e-171	7213	0.0268431	0.0975545	779.511
P17252	PRKCA	rs61762372	A	0.399002	0.305938	9.35e-73	7213	0.0169583	0.0431737	325.373
P17301	ITGA2	rs13186378	G	0.321018	0.143594	7.28e-16	7213	0.017803	0.00893865	65.0379
P17405	SMPD1	rs1050239	A	0.231318	-0.605083	1e-200	7213	0.020017	0.112439	913.509
P17516	AKR1C4	rs75811842	G	0.154582	-1.05255	1e-200	7213	0.0348198	0.112439	913.509
P17535	JUND	rs12610373	A	0.362956	0.167005	7.44e-22	7213	0.0173829	0.012635	92.2766
P17538	CTRB1	rs8057145	A	0.192777	-0.614443	2.29e-195	7213	0.0206065	0.109738	888.861
P17655	CAPN2	rs188530181	C	0.0108831	-1.43837	1.13e-72	7213	0.0797759	0.0431258	324.996
P17813	ENG	rs11794565	T	0.456329	0.241888	1.26e-48	7213	0.016506	0.0289126	214.696
P17900	GM2A	rs72794132	T	0.165812	0.706237	1e-200	7213	0.0233633	0.112439	913.509
P17927	CR1	rs679515	T	0.18224	0.618221	3.32e-193	7213	0.0208501	0.108644	878.921
P17931	LGALS3	rs118083722	A	0.0865105	-0.80857	2.09e-175	7213	0.0286357	0.0995338	797.074
P17936	IGFBP3	rs148562589	C	0.0159434	1.12319	5.16e-66	7213	0.0654484	0.0392294	294.434
P18065	IGFBP2	rs4674091	T	0.420421	-0.104725	4.14e-10	7213	0.0167596	0.00538409	39.0349
P18075	BMP7	rs6123685	A	0.25454	0.111039	6.4e-09	7213	0.019125	0.00465164	33.6998
P18085	ARF4	rs141818286	G	0.0524747	0.242484	7.71e-11	7213	0.03727	0.00583433	42.3183
P18428	LBP	rs2232613	T	0.0797172	-1.21273	1e-200	7213	0.0401188	0.112439	913.509
P18510	IL1RN	rs55709272	C	0.440385	-0.37788	8.23e-115	7213	0.0165923	0.0670841	518.528
P18627	LAG3	rs3782735	G	0.399418	-0.170626	5.59e-24	7213	0.0168956	0.0139421	101.958
P19021	PAM	rs12656561	C	0.354083	-0.574245	1e-200	7213	0.0189968	0.112439	913.509
P19174	PLCG1	rs753381	T	0.450437	-0.153841	2.05e-20	7213	0.016614	0.0117475	85.7183
P19224	UGT1A6	rs887829	T	0.329821	-0.378993	5.58e-104	7213	0.0175023	0.0610387	468.763
P19256	CD58	rs60612523	G	0.0165673	0.704774	1.95e-27	7213	0.0649439	0.0160648	117.734
P19320	VCAM1	rs141294855	C	0.216207	-0.128724	1.78e-10	7213	0.0201787	0.00561016	40.6831
P19438	TNFRSF1A	rs1800693	C	0.404963	-0.191908	2.1e-30	7213	0.0167462	0.0178814	131.291
P19801	AOC1	rs10452848	G	0.440247	0.768101	1e-200	7213	0.0254098	0.112439	913.509
P19823	ITIH2	rs17142907	G	0.0658533	1.35362	1e-200	7213	0.0447796	0.112439	913.509
P19827	ITIH1	rs1042779	G	0.379384	-0.691912	1e-200	7213	0.0228894	0.112439	913.509
P19835	CEL	rs2075733	G	0.0409677	0.442834	2.9e-26	7213	0.0417668	0.0153457	112.383
P19875	CXCL2	rs1893319	T	0.370927	0.113199	5.89e-11	7213	0.0172915	0.0059065	42.8448
P19957	PI3	rs56168207	T	0.182379	0.376689	3.49e-69	7213	0.0214268	0.0410878	308.98
P19961	AMY2B	rs12076610	T	0.093789	0.612807	4.28e-105	7213	0.0281466	0.0616647	473.887
P19971	TYMP	rs131805	T	0.221475	-0.362562	2.87e-75	7213	0.01975	0.044636	336.908
P20023	CR2	rs61821130	A	0.112575	-0.237385	2.42e-19	7213	0.0263986	0.0110864	80.8399
P20061	TCN1	rs34324219	A	0.106405	-0.571434	4.71e-102	7213	0.0266421	0.0599555	459.913
P20062	TCN2	rs5753236	G	0.448426	0.916242	1e-200	7213	0.0303105	0.112439	913.509
P20073	ANXA7	rs117332875	G	0.0203106	-0.46588	2.52e-15	7213	0.058878	0.00860543	62.5924
P20138	CD33	rs3865444	A	0.323652	-0.942226	1e-200	7213	0.0311701	0.112439	913.509
P20155	SPINK2	rs7694521	A	0.469084	0.216886	1.9e-39	7213	0.0165037	0.0233835	172.655
P20231	TPSB2	rs3874639	G	0.486413	-0.793065	1e-200	7213	0.0262357	0.112439	913.509
P20333	TNFRSF1B	rs519064	T	0.0334812	-1.14125	2.14e-141	7213	0.0450805	0.0816016	640.712
P20339	RAB5A	rs4241540	C	0.371274	-0.116966	1.28e-11	7213	0.0172749	0.00631572	45.8321
P20366	TAC1	rs2072099	T	0.169971	-0.267924	3.74e-34	7213	0.0219882	0.0201688	148.431
P20591	MX1	rs464783	T	0.406835	-0.413879	1.4e-135	7213	0.0167008	0.0784641	613.98
P20618	PSMB1	rs3734763	C	0.411757	-0.529913	1e-200	7213	0.0175302	0.112439	913.509
P20742	PZP	rs1017301	C	0.321849	-0.508647	2.71e-189	7213	0.0173329	0.106658	860.932
P20774	OGN	rs10992291	C	0.367947	0.567692	1e-200	7213	0.01878	0.112439	913.509
P20783	NTF3	rs67394720	T	0.097047	-0.190756	1.58e-11	7213	0.0283006	0.00625926	45.4198
P20839	IMPDH1	rs1053124	T	0.200541	0.120469	6.89e-09	7213	0.0207935	0.00463193	33.5563
P20849	COL9A1	rs13199337	T	0.175378	0.143297	5.62e-11	7213	0.0218657	0.00591907	42.9366
P21128	ENDOU	rs1153977	T	0.466449	-0.114451	5.48e-12	7213	0.016605	0.00654325	47.4941
P21217	FUT3	rs708686	T	0.292042	-0.682224	1e-200	7213	0.0225689	0.112439	913.509
P21246	PTN	rs322329	C	0.420421	0.293789	8.83e-69	7213	0.0167616	0.0408519	307.13
P21266	GSTM3	rs1292096	A	0.206017	0.540104	2.23e-160	7213	0.0200151	0.0916965	727.976
P21291	CSRP1	rs3767541	C	0.346527	-0.180995	4.49e-25	7213	0.0174988	0.0146152	106.953
P21580	TNFAIP3	rs5029937	T	0.0305005	0.280835	4.45e-09	7213	0.0478707	0.00474876	34.4067
P21589	NT5E	rs6903114	T	0.311174	0.464768	3.73e-154	7213	0.0175721	0.0884112	699.365
P21695	GPD1	rs75732302	T	0.0140718	-0.444382	3.32e-10	7213	0.0707271	0.0054432	39.4657
P21709	EPHA1	rs4421280	G	0.0827672	-1.38881	1e-200	7213	0.0459437	0.112439	913.509
P21741	MDK	rs61882743	G	0.176626	-0.149262	8.53e-12	7213	0.021856	0.00642456	46.6271
P21757	MSR1	rs41341748	A	0.0102593	-1.49438	3.87e-79	7213	0.0793388	0.0468795	354.675
P21781	FGF7	rs12439429	C	0.460627	-0.183085	2.58e-28	7213	0.0165908	0.016603	121.746
P21815	IBSP	rs2616262	G	0.497643	0.116683	1.98e-12	7213	0.016584	0.00681634	49.49
P21854	CD72	rs75679360	A	0.0516429	0.526913	1.19e-44	7213	0.0375852	0.0265249	196.483
P21860	ERBB3	rs2292238	C	0.412172	-0.19803	1.05e-32	7213	0.0166272	0.0192863	141.808
P21980	TGM2	rs13039547	C	0.374532	-0.209571	1.29e-34	7213	0.017078	0.0204503	150.546
P22079	LPO	rs11656836	T	0.203175	-0.275333	2.61e-41	7213	0.0204523	0.0245098	181.181
P22105	TNXB	rs116298992	T	0.0253709	-1.60098	1e-200	7213	0.0529626	0.112439	913.509
P22309	UGT1A1	rs887829	T	0.329821	-0.607257	1e-200	7213	0.0200889	0.112439	913.509
P22392	NME2	rs115848216	A	0.0409677	-1.37989	1e-200	7213	0.0456486	0.112439	913.509
P22607	FGFR3	rs79825628	A	0.183488	0.366185	3.32e-66	7213	0.0213059	0.0393419	295.313
P22681	CBL	rs76683040	T	0.0713295	-0.709014	2.31e-108	7213	0.0320615	0.0634944	488.9
P22749	GNLY	rs12151742	T	0.22099	0.783971	1e-200	7213	0.0259348	0.112439	913.509
P22792	CPN2	rs11711157	T	0.276723	-0.754011	1e-200	7213	0.0249437	0.112439	913.509
P22894	MMP8	rs11225395	A	0.439554	0.232217	1.31e-44	7213	0.0165723	0.0264998	196.291
P22897	MRC1	rs561612	A	0.20775	0.704389	1e-200	7213	0.0233021	0.112439	913.509
P23141	CES1	rs76336259	A	0.0469985	-0.460061	1.3e-31	7213	0.0393271	0.0186195	136.813
P23142	FBLN1	rs11090631	T	0.19347	-0.343656	1.86e-60	7213	0.0209525	0.0359549	268.941
P23280	CA6	rs3765963	G	0.404478	0.648589	1e-200	7213	0.0214562	0.112439	913.509
P23381	WARS	rs4905957	C	0.251352	-0.632638	1e-200	7213	0.0209285	0.112439	913.509
P23435	CBLN1	rs12596832	A	0.142312	-1.03161	1e-200	7213	0.0341271	0.112439	913.509
P23515	OMG	rs72813607	A	0.131568	-0.195295	2.3e-15	7213	0.024646	0.00862995	62.7723
P23560	BDNF	rs75994913	G	0.0392347	0.375336	1.96e-18	7213	0.0428487	0.0105258	76.7088
P23588	EIF4B	rs146008363	A	0.0571191	-0.212298	3.19e-09	7213	0.035852	0.00483774	35.0546
P23919	DTYMK	rs142497237	T	0.0431859	0.595972	1.02e-49	7213	0.0402023	0.0295665	219.7
P23921	RRM1	rs1662161	A	0.459795	0.104714	2.47e-10	7213	0.0165455	0.0055224	40.0432
P24158	PRTN3	rs2930903	C	0.40219	-0.146841	7.32e-18	7213	0.0170551	0.0101725	74.1078
P24298	GPT	rs4244610	A	0.47553	-0.137154	1.06e-16	7213	0.0165288	0.00945563	68.8355
P24387	CRHBP	rs10942798	C	0.365105	0.648448	1e-200	7213	0.0214515	0.112439	913.509
P24592	IGFBP6	rs822688	T	0.142728	-0.221984	1.06e-20	7213	0.0237928	0.0119241	87.0224
P24666	ACP1	rs79716074	G	0.345903	1.03283	1e-200	7213	0.0341674	0.112439	913.509
P24752	ACAT1	rs12577790	A	0.238736	-0.135155	3.82e-12	7213	0.0194644	0.00664004	48.2014
P24821	TNC	rs1138545	T	0.148759	1.19576	1e-200	7213	0.0395574	0.112439	913.509
P25311	AZGP1	rs1981550	A	0.291626	-0.51842	3.2e-190	7213	0.0176223	0.107129	865.199
P25445	FAS	rs7911226	G	0.304242	-0.433387	1.02e-131	7213	0.0177464	0.0763685	596.227
P25774	CTSS	rs41271951	G	0.0745182	-1.09777	1e-200	7213	0.0363157	0.112439	913.509
P26196	DDX6	rs6589677	A	0.113753	0.156736	1.69e-09	7213	0.0260138	0.00500764	36.2918
P26440	IVD	rs12440453	T	0.317968	0.219407	6.23e-35	7213	0.0177943	0.0206426	151.991
P26447	S100A4	rs79399329	A	0.0564259	0.245223	8.19e-12	7213	0.0358766	0.00643547	46.7068
P26639	TARS	rs3777083	G	0.191876	-0.216131	5.03e-25	7213	0.0209178	0.0145849	106.728
P26885	FKBP2	rs72920394	A	0.0951061	-0.232746	2.15e-16	7213	0.0283373	0.0092659	67.4413
P26927	MST1	rs3197999	A	0.284417	-1.04869	1e-200	7213	0.0346921	0.112439	913.509
P26992	CNTFR	rs73645429	A	0.0181617	-0.996468	1.05e-59	7213	0.0611472	0.0355104	265.493
P27352	GIF	rs150884181	G	0.0106059	-0.5299	8.29e-11	7213	0.0815828	0.0058149	42.1765
P27361	MAPK3	rs9932466	T	0.338763	0.6286	1e-200	7213	0.0207949	0.112439	913.509
P27487	DPP4	rs13015258	T	0.394704	0.124202	1.73e-13	7213	0.0168566	0.00747043	54.2747
P27695	APEX1	rs1130409	G	0.468182	0.203126	1.31e-34	7213	0.0165545	0.0204462	150.515
P27930	IL1R2	rs2310170	G	0.401497	-0.521562	1e-200	7213	0.017254	0.112439	913.509
P28070	PSMB4	rs4603	C	0.180923	-0.710493	1e-200	7213	0.0235041	0.112439	913.509
P28325	CST5	rs6138152	G	0.174199	0.729782	1e-200	7213	0.0241422	0.112439	913.509
P28332	ADH6	rs28730611	C	0.0381949	-1.16016	3.87e-163	7213	0.0426232	0.0931463	740.669
P28676	GCA	rs17783344	G	0.133024	-0.5921	9.73e-134	7213	0.0240587	0.0774659	605.513
P28799	GRN	rs5848	T	0.281575	-0.24927	5.4e-42	7213	0.0183582	0.0249231	184.314
P28838	LAP3	rs114838597	T	0.0259947	0.520345	2.36e-23	7213	0.0522613	0.0135574	99.1064
P29034	S100A2	rs58056804	A	0.0521281	-0.309332	7.27e-17	7213	0.0370788	0.00955679	69.579
P29120	PCSK1	rs6234	C	0.274227	-1.00052	1e-200	7213	0.0330986	0.112439	913.509
P29218	IMPA1	rs2142316	G	0.30854	-0.147208	1.63e-16	7213	0.0178508	0.00934019	67.9871
P29317	EPHA2	rs924204	A	0.408291	0.371275	3.85e-112	7213	0.0164987	0.065601	506.26
P29323	EPHB2	rs2043970	C	0.0802717	-0.8304	4.88e-170	7213	0.0298751	0.0967497	772.39
P29353	SHC1	rs61751623	G	0.0478303	-0.295485	4.77e-14	7213	0.0391991	0.0078162	56.8067
P29373	CRABP2	rs3806412	G	0.388743	-0.54454	1e-200	7213	0.0180141	0.112439	913.509
P29460	IL12B	rs4244437	G	0.309996	-0.58191	1e-200	7213	0.0192504	0.112439	913.509
P29622	SERPINA4	rs5511	T	0.210107	0.784962	1e-200	7213	0.0259676	0.112439	913.509
P30041	PRDX6	rs33951697	T	0.184112	0.513529	3.13e-133	7213	0.0209065	0.0771905	603.181
P30043	BLVRB	rs184723794	G	0.0106752	-1.15056	6.25e-46	7213	0.0808729	0.0272947	202.345
P30046	DDT	rs4820571	A	0.385762	0.218832	2.4e-38	7213	0.0169004	0.0227162	167.614
P30048	PRDX3	rs1810159	A	0.117427	0.168914	5.15e-11	7213	0.0257235	0.00594248	43.1074
P30085	CMPK1	rs35687416	T	0.0466519	-0.653522	1.34e-62	7213	0.0391362	0.0372199	278.769
P30086	PEBP1	rs1050625	T	0.0120616	-1.89546	4.08e-144	7213	0.0741526	0.0830616	653.214
P30101	PDIA3	rs12900924	T	0.179398	-0.148016	8.13e-12	7213	0.0216517	0.00643745	46.7212
P30405	PPIF	rs12252016	A	0.0168446	-0.453721	1.4e-12	7213	0.0640482	0.00690934	50.1699
P30533	LRPAP1	rs16844464	T	0.0309857	-0.979512	1.33e-95	7213	0.0472143	0.05631	430.281
P30566	ADSL	rs8192455	C	0.142312	0.129038	4.58e-08	7213	0.0236035	0.00412638	29.8786
P30626	SRI	rs76354035	C	0.203521	0.28658	2.03e-43	7213	0.020742	0.0257827	190.84
P30740	SERPINB1	rs316343	C	0.454873	-0.302428	3.51e-75	7213	0.0164841	0.0445852	336.507
P30838	ALDH3A1	rs887241	A	0.340496	-0.216368	5.02e-36	7213	0.0172659	0.0213077	156.995
P31025	LCN1	rs12340697	T	0.151809	-0.20562	3.58e-19	7213	0.0229763	0.0109814	80.0663
P31151	S100A7	rs3014837	C	0.0595453	1.48186	1e-200	7213	0.0490219	0.112439	913.509
P31946	YWHAB	rs6031847	T	0.28005	-0.895903	1e-200	7213	0.0296377	0.112439	913.509
P31994	FCGR2B	rs6665610	A	0.190628	1.13568	1e-200	7213	0.0375698	0.112439	913.509
P31997	CEACAM8	rs10420796	G	0.0900458	-0.178236	8.27e-10	7213	0.0290303	0.00519886	37.6849
P32019	INPP5B	rs61776662	G	0.136975	-0.919903	1e-200	7213	0.0304316	0.112439	913.509
P32455	GBP1	rs61798920	T	0.35034	-0.168436	3.24e-22	7213	0.0173777	0.0128573	93.9215
P32456	GBP2	rs10922556	C	0.215791	-0.161393	1.42e-15	7213	0.0202153	0.00875936	63.7219
P32927	CSF2RB	rs2239749	G	0.457785	-0.69957	1e-200	7213	0.0231427	0.112439	913.509
P32971	TNFSF8	rs3181348	A	0.426452	-0.244436	1.57e-48	7213	0.0166969	0.0288553	214.258
P33151	CDH5	rs6499080	T	0.318383	-0.221214	6.28e-36	7213	0.0176777	0.0212486	156.55
P33316	DUT	rs6493314	T	0.136212	-0.15394	2.45e-10	7213	0.0243187	0.00552458	40.0591
P34096	RNASE4	rs1888560	T	0.313947	-0.51182	8.65e-190	7213	0.017418	0.10691	863.213
P34810	CD68	rs9901673	A	0.163108	0.587568	1.51e-158	7213	0.021901	0.0907325	719.56
P34896	SHMT1	rs4398149	A	0.365937	-0.662513	1e-200	7213	0.0219168	0.112439	913.509
P35030	PRSS3	rs83921	A	0.37273	-0.550732	1e-200	7213	0.018219	0.112439	913.509
P35052	GPC1	rs1126920	T	0.110218	0.799601	1e-200	7213	0.0264519	0.112439	913.509
P35241	RDX	rs7935163	C	0.356024	-0.0946592	4.22e-08	7213	0.0172692	0.0041482	30.0373
P35247	SFTPD	rs7084667	T	0.344586	0.521653	1e-200	7213	0.017257	0.112439	913.509
P35442	THBS2	rs74507247	A	0.0982947	0.945145	1e-200	7213	0.0312667	0.112439	913.509
P35443	THBS4	rs13167730	T	0.0934424	0.654834	5.7e-119	7213	0.0282374	0.0693854	537.642
P35475	IDUA	rs3796622	T	0.360322	-0.623674	1e-200	7213	0.020632	0.112439	913.509
P35542	SAA4	rs7117890	G	0.470331	0.590198	1e-200	7213	0.0195245	0.112439	913.509
P35558	PCK1	rs2070756	T	0.253778	-0.259345	1.47e-42	7213	0.0189675	0.0252642	186.902
P35590	TIE1	rs1556580	T	0.386178	-0.255506	1.54e-52	7213	0.0167497	0.0312523	232.631
P35625	TIMP3	rs5749506	C	0.267988	0.667918	1e-200	7213	0.0220956	0.112439	913.509
P35754	GLRX	rs6884979	C	0.348953	-0.110401	2.01e-10	7213	0.0173571	0.0055776	40.4457
P35813	PPM1A	rs183404450	C	0.03972	-0.270711	2.07e-10	7213	0.042591	0.00556973	40.3882
P35858	IGFALS	rs11641257	C	0.0711909	0.268751	3.71e-17	7213	0.0319117	0.00973724	70.9057
P35916	FLT4	rs1130379	T	0.107584	-0.255045	1.98e-21	7213	0.0268297	0.0123731	90.3403
P35968	KDR	rs34231037	G	0.0307778	-1.11205	3.16e-121	7213	0.0474974	0.0706289	548.011
P36222	CHI3L1	rs946259	C	0.472203	0.834643	1e-200	7213	0.0276111	0.112439	913.509
P36405	ARL3	rs8354	T	0.0913628	-0.741442	2.87e-149	7213	0.028494	0.0858152	676.902
P36551	CPOX	rs1675513	G	0.155552	-0.267199	9.75e-32	7213	0.0227933	0.0186958	137.384
P36871	PGM1	rs1126728	T	0.221891	0.226637	3.98e-30	7213	0.019873	0.0177117	130.022
P36952	SERPINB5	rs7244879	A	0.319077	-0.138506	1.05e-14	7213	0.0179109	0.00822243	59.7835
P36955	SERPINF1	rs62088172	T	0.347359	-0.563544	1e-200	7213	0.0186428	0.112439	913.509
P36959	GMPR	rs1042391	A	0.395051	0.940174	1e-200	7213	0.0311022	0.112439	913.509
P36980	CFHR2	rs4085749	T	0.227575	-0.879405	1e-200	7213	0.0290919	0.112439	913.509
P37023	ACVRL1	rs78197611	T	0.0885207	0.496669	1.52e-66	7213	0.028822	0.0395411	296.87
P37235	HPCAL1	rs7581642	T	0.162623	0.130405	6.51e-09	7213	0.0224716	0.00464709	33.6666
P37802	TAGLN2	rs2789422	A	0.423957	-0.252272	3.03e-52	7213	0.0165858	0.031077	231.284
P37837	TALDO1	rs10902210	A	0.0962845	0.159003	1.64e-08	7213	0.0281609	0.00440034	31.8711
P39059	COL15A1	rs7867960	C	0.368293	0.350249	3e-93	7213	0.0170988	0.0549732	419.472
P39060	COL18A1	rs144147445	A	0.0148343	-1.20663	1.73e-70	7213	0.06798	0.0418508	314.968
P39656	DDOST	rs150466875	G	0.0811729	-0.369582	3.9e-34	7213	0.0303396	0.0201578	148.348
P39900	MMP12	rs2276109	C	0.129696	-0.749039	1e-200	7213	0.0247792	0.112439	913.509
P40121	CAPG	rs62623452	T	0.0128934	-1.7656	2.06e-134	7213	0.0715586	0.0778315	608.612
P40189	IL6ST	rs13183065	A	0.119437	0.654538	3.24e-149	7213	0.0251588	0.0857871	676.66
P40197	GP5	rs1466733	G	0.256689	-0.265821	1.14e-44	7213	0.0189571	0.0265361	196.568
P40394	ADH7	rs1573496	G	0.100305	-0.447271	1.99e-59	7213	0.0275124	0.035346	264.219
P40763	STAT3	rs4796791	T	0.34625	-0.428859	2.72e-138	7213	0.0171322	0.0799296	626.443
P40818	USP8	rs62016940	G	0.169694	0.246684	4.86e-29	7213	0.022056	0.0170469	125.057
P40925	MDH1	rs262505	C	0.281714	0.340077	9.37e-76	7213	0.0184641	0.0449183	339.14
P40926	MDH2	rs10256	G	0.0491474	0.345975	1.33e-19	7213	0.038196	0.0112467	82.0226
P40967	PMEL	rs3213122	A	0.0779149	0.451595	1.07e-47	7213	0.0311262	0.0283555	210.439
P41217	CD200	rs9823309	T	0.23527	-0.219756	3.11e-29	7213	0.0195792	0.0171655	125.943
P41222	PTGDS	rs11145948	G	0.483571	-0.262711	9.45e-58	7213	0.0164002	0.0343527	256.53
P41240	CSK	rs34933034	A	0.164564	0.489076	7.53e-110	7213	0.0219631	0.0643245	495.732
P41271	NBL1	rs3020595	G	0.244212	-0.223588	1.45e-31	7213	0.019128	0.0185906	136.596
P41439	FOLR3	rs146694036	T	0.0938583	1.02158	1e-200	7213	0.0337953	0.112439	913.509
P42126	DCI	rs55650311	T	0.162484	-0.175538	6.11e-15	7213	0.0225001	0.00836774	60.849
P42127	ASIP	rs6059655	A	0.0793706	0.926197	1e-200	7213	0.0306399	0.112439	913.509
P42167	TMPO	rs61932018	G	0.0447803	-0.230861	9.06e-09	7213	0.0401676	0.00455879	33.024
P42226	STAT6	rs703817	C	0.489602	-0.105123	2.68e-10	7213	0.0166433	0.00550055	39.8839
P42330	AKR1C3	rs4880709	G	0.339387	0.135515	7.69e-15	7213	0.017435	0.00830602	60.3963
P42331	ARHGAP25	rs13413887	A	0.232636	-0.308586	1.08e-55	7213	0.0196285	0.0331308	247.092
P42574	CASP3	rs72689255	C	0.124567	-0.728277	2.2e-193	7213	0.0245504	0.108735	879.743
P42680	TEC	rs4543082	C	0.202828	0.164147	2.58e-15	7213	0.0207526	0.00859912	62.5461
P42701	IL12RB1	rs375947	G	0.317482	-0.2348	2.94e-40	7213	0.0176779	0.0238739	176.365
P42702	LIFR	rs3729741	T	0.340496	0.252336	9.36e-48	7213	0.0173813	0.0283904	210.705
P42785	PRCP	rs2229437	G	0.176487	0.344918	2.09e-57	7213	0.0215988	0.0341482	254.949
P43155	CRAT	rs3124499	G	0.289339	-0.256183	1.13e-44	7213	0.018269	0.0265384	196.586
P43234	CTSO	rs2334114	A	0.210176	-0.214937	8.23e-26	7213	0.0204613	0.0150677	110.315
P43251	BTD	rs13078881	C	0.0399972	-1.4571	1e-200	7213	0.0482028	0.112439	913.509
P43405	SYK	rs10993706	G	0.0747262	-0.371118	3.39e-32	7213	0.0314191	0.0189758	139.481
P43628	KIR2DL3	rs4806594	G	0.187439	0.245625	6.53e-32	7213	0.0208925	0.0188021	138.18
P43652	AFM	rs72856662	T	0.0210037	-1.14918	1.63e-89	7213	0.0572853	0.0528439	402.317
P45452	MMP13	rs655316	T	0.317344	0.132737	7.41e-14	7213	0.0177447	0.00769798	55.9408
P45877	PPIC	rs17388251	C	0.383821	-0.750978	1e-200	7213	0.0248434	0.112439	913.509
P45984	MAPK9	rs11741142	C	0.204977	0.340169	4.51e-62	7213	0.0204599	0.036909	276.351
P46063	RECQL	rs74626198	C	0.0273118	-0.390423	1.23e-14	7213	0.0506195	0.00817996	59.4722
P46108	CRK	rs12936625	T	0.367808	0.20039	1.87e-31	7213	0.0171752	0.0185231	136.091
P46109	CRKL	rs117858197	C	0.0152502	-0.639355	7.42e-21	7213	0.0682517	0.0120196	87.7276
P46531	NOTCH1	rs9411207	T	0.346458	0.188335	4.77e-27	7213	0.017487	0.0158266	115.961
P47972	NPTX2	rs12673464	C	0.289616	-0.300661	9.5e-63	7213	0.017983	0.037308	279.454
P48060	GLIPR1	rs7975447	C	0.394427	-0.0957356	1.85e-08	7213	0.0170182	0.00436818	31.6372
P48061	CXCL12	rs1023264	C	0.325939	0.176212	8.26e-23	7213	0.0179237	0.0132227	96.6264
P48147	PREP	rs1051484	T	0.156662	0.793538	1e-200	7213	0.0262513	0.112439	913.509
P48304	REG1B	rs11126696	A	0.384167	-0.324922	3.22e-81	7213	0.0170229	0.0480809	364.224
P48307	TFPI2	rs17165852	G	0.0443643	-0.278301	5.92e-12	7213	0.0404415	0.00652253	47.3428
P48357	LEPR	rs2376018	G	0.175447	-1.25859	1e-200	7213	0.0416359	0.112439	913.509
P48426	PIP4K2A	rs7098978	G	0.289824	-0.481854	3.1e-159	7213	0.0179213	0.0910949	722.721
P48507	GCLM	rs7521934	T	0.493831	0.234163	5.19e-45	7213	0.0166333	0.0267418	198.133
P48637	GSS	rs6088642	G	0.375711	-0.438391	1.13e-153	7213	0.0166011	0.0881561	697.152
P48643	CCT5	rs11557652	T	0.0207265	-0.516992	9.68e-19	7213	0.0584916	0.0107149	78.1017
P48723	HSPA13	rs2822638	C	0.251213	0.26387	5.86e-44	7213	0.0189759	0.0261079	193.311
P48740	MASP1	rs3774275	G	0.309303	-0.213235	2.37e-33	7213	0.0177202	0.0196804	144.764
P48745	NOV	rs17793097	G	0.102038	0.270322	7.6e-23	7213	0.0274728	0.0132449	96.7912
P48960	CD97	rs3786656	T	0.282892	0.122519	2.22e-11	7213	0.0183116	0.00616807	44.754
P49137	MAPKAPK2	rs4256810	C	0.317205	0.330034	1.54e-77	7213	0.0177063	0.0459533	347.33
P49221	TGM4	rs6650899	G	0.418688	-0.11859	1.6e-12	7213	0.0167843	0.00687351	49.9079
P49223	SPINT3	rs6073773	G	0.472758	-0.409398	1.67e-137	7213	0.0164023	0.0795041	622.821
P49247	RPIA	rs11686263	A	0.386524	0.185536	3.01e-27	7213	0.0171597	0.0159492	116.874
P49327	FASN	rs62078746	G	0.456814	0.179629	9.06e-28	7213	0.0164467	0.0162688	119.254
P49407	ARRB1	rs504683	G	0.293775	0.5338	1.48e-198	7213	0.0177561	0.111347	903.529
P49588	AARS	rs2070203	A	0.490018	0.108285	7.3e-11	7213	0.0166225	0.00584898	42.4251
P49589	CARS	rs445375	A	0.406211	0.149995	1.96e-18	7213	0.0171236	0.0105258	76.7088
P49746	THBS3	rs72704117	T	0.0194787	0.411296	5.36e-12	7213	0.0596453	0.00654918	47.5375
P49747	COMP	rs12974746	G	0.0256481	-0.698886	1.62e-40	7213	0.0524427	0.0240305	177.55
P49748	ACADVL	rs446994	C	0.414113	0.0969528	9.83e-09	7213	0.0169095	0.00453701	32.8655
P49767	VEGFC	rs112782083	C	0.0110911	1.07707	6.86e-42	7213	0.0794266	0.0248603	183.838
P49773	HINT1	rs12332117	T	0.247886	0.314202	6.87e-61	7213	0.0190864	0.0362106	270.925
P49788	RARRES1	rs4680458	G	0.292805	0.652282	1e-200	7213	0.0215784	0.112439	913.509
P49789	FHIT	rs13070475	G	0.349092	-0.15566	3.49e-19	7213	0.0173882	0.0109883	80.1166
P49840	GSK3A	rs61088131	C	0.161722	0.124651	4.59e-08	7213	0.0228027	0.0041258	29.8744
P49862	KLK7	rs1654523	C	0.0829752	-0.590329	2.32e-88	7213	0.0296229	0.0521845	397.021
P49863	GZMK	rs2407827	T	0.420421	-0.168677	7.78e-24	7213	0.0167565	0.0138539	101.304
P49902	NT5C2	rs12257472	T	0.304728	0.155142	7.89e-18	7213	0.0180373	0.0101524	73.9598
P49914	MTHFS	rs8039272	C	0.354083	-0.707003	1e-200	7213	0.0233886	0.112439	913.509
P49961	ENTPD1	rs11598475	A	0.340774	0.292389	2.54e-63	7213	0.0174066	0.0376457	282.082
P50395	GDI2	rs55913768	A	0.326078	-0.471464	1.35e-165	7213	0.0171905	0.094433	751.967
P50452	SERPINB8	rs3826616	A	0.425828	0.428375	4.32e-150	7213	0.0164169	0.0862531	680.682
P50454	SERPINH1	rs599816	G	0.462152	-0.211427	4.1e-37	7213	0.0166104	0.0219685	161.973
P50479	PDLIM4	rs4877	T	0.0924026	-0.449204	2.77e-56	7213	0.0284175	0.0334819	249.802
P50502	ST13	rs138337	G	0.467559	0.28252	5.46e-65	7213	0.0165955	0.0386273	289.733
P50583	NUDT2	rs10971956	G	0.415361	-0.761049	1e-200	7213	0.0251765	0.112439	913.509
P50895	BCAM	rs28399656	A	0.011507	1.51946	1.21e-85	7213	0.0774742	0.0506274	384.542
P50897	PPT1	rs7533094	A	0.0469985	-1.11779	2.18e-191	7213	0.0378791	0.107722	870.564
P50995	ANXA11	rs2819952	T	0.419659	-0.625259	1e-200	7213	0.0206844	0.112439	913.509
P51124	GZMM	rs8107361	A	0.0734784	-0.209342	3.79e-11	7213	0.0316606	0.00602468	43.7073
P51512	MMP16	rs4961090	A	0.316997	0.144903	1.54e-16	7213	0.0175568	0.00935543	68.0991
P51570	GALK1	rs60521621	C	0.13441	0.161404	2.49e-11	7213	0.0241842	0.0061373	44.5293
P51671	CCL11	rs6505397	A	0.419104	-0.147153	2.59e-18	7213	0.0168597	0.0104511	76.1585
P51693	APLP1	rs58291714	C	0.0328573	0.320672	3.88e-12	7213	0.0461965	0.00663586	48.1709
P51857	AKR1D1	rs2306847	A	0.210523	-0.186947	6.63e-20	7213	0.0204682	0.0114332	83.3983
P51858	HDGF	rs12145743	G	0.346666	-0.778949	1e-200	7213	0.0257687	0.112439	913.509
P51884	LUM	rs3741835	G	0.0198946	-0.712224	3.02e-33	7213	0.0592856	0.0196162	144.283
P51911	CNN1	rs138405741	T	0.0318869	-0.325829	8.11e-12	7213	0.0476596	0.00643811	46.726
P51946	CCNH	rs2230641	G	0.22196	-0.165792	7.51e-17	7213	0.0198822	0.00954808	69.5149
P52209	PGD	rs111782199	T	0.0198253	-0.947738	5.83e-57	7213	0.0595866	0.0338838	252.906
P52566	ARHGDIB	rs10444404	G	0.408013	-0.151537	3.34e-19	7213	0.0169185	0.011	80.2034
P52594	AGFG1	rs11679534	C	0.296964	0.413824	2.26e-122	7213	0.0175908	0.0712591	553.275
P52758	HRSP12	rs10955148	C	0.316512	-0.410085	5.78e-120	7213	0.0176088	0.0699336	542.21
P52789	HK2	rs641180	A	0.281575	0.147991	1.21e-15	7213	0.0184909	0.00880231	64.0371
P52790	HK3	rs61749653	T	0.0216276	-0.521669	8.95e-20	7213	0.0573199	0.0113528	82.8053
P52797	EFNA3	rs17723260	A	0.142243	-0.138962	4.41e-09	7213	0.0236812	0.00475117	34.4242
P52798	EFNA4	rs3806256	T	0.488008	0.101451	9.84e-10	7213	0.0165987	0.00515235	37.346
P52799	EFNB2	rs59166663	C	0.142035	0.278786	3.71e-32	7213	0.0236174	0.0189519	139.302
P52803	EFNA5	rs6596742	A	0.47657	-0.28344	1.04e-65	7213	0.0165554	0.0390506	293.037
P52823	STC1	rs28588821	T	0.110703	0.188057	7.57e-13	7213	0.026233	0.00707432	51.3764
P52848	NDST1	rs11746198	T	0.403577	0.228075	1.25e-41	7213	0.0168738	0.0247029	182.645
P52907	CAPZA1	rs6700673	T	0.475669	0.136276	3.96e-16	7213	0.016742	0.00910203	66.2376
P53004	BLVRA	rs1050916	G	0.0114377	-1.11345	3.98e-47	7213	0.0772257	0.0280132	207.825
P53367	ARFIP1	rs4619875	T	0.39304	0.425011	5.61e-145	7213	0.0165767	0.0835232	657.175
P53582	METAP1	rs6822589	A	0.38902	0.122328	6.16e-13	7213	0.0169973	0.00712963	51.7809
P53674	CRYBB1	rs5761621	G	0.325662	-0.201325	1.05e-29	7213	0.0177856	0.017454	128.097
P53778	MAPK12	rs3817818	C	0.459795	0.206294	3.26e-35	7213	0.0166604	0.0208137	153.278
P53814	SMTN	rs7287178	C	0.287259	0.126388	6.9e-12	7213	0.0184247	0.00648144	47.0426
P54252	ATXN3	rs1133441	A	0.33093	-0.59418	1e-200	7213	0.0196563	0.112439	913.509
P54296	MYOM2	rs3824184	A	0.144045	-0.172151	3.76e-13	7213	0.0236994	0.0072621	52.7501
P54315	PNLIPRP1	rs7906926	T	0.339041	-0.218421	3.96e-36	7213	0.0174036	0.0213703	157.466
P54317	PNLIPRP2	rs2286779	G	0.477194	-0.853435	1e-200	7213	0.0282328	0.112439	913.509
P54727	RAD23B	rs11573709	A	0.228268	0.18305	8.87e-21	7213	0.0195802	0.0119718	87.3747
P54756	EPHA5	rs28663440	T	0.0743103	0.403083	1.93e-37	7213	0.0315221	0.0221671	163.47
P54760	EPHB4	rs314345	G	0.472064	-0.258365	3.02e-54	7213	0.0166591	0.0322701	240.459
P54762	EPHB1	rs10935143	A	0.447525	0.398707	1.27e-129	7213	0.0164598	0.0752279	586.597
P54764	EPHA4	rs16862777	C	0.274088	-0.291608	8.95e-56	7213	0.0185345	0.0331793	247.466
P54802	NAGLU	rs41283429	T	0.0419382	1.0998	1.15e-162	7213	0.040465	0.0928982	738.494
P54826	GAS1	rs4878043	C	0.45418	-0.155893	9.42e-21	7213	0.0166867	0.0119557	87.2557
P54920	NAPA	rs71363738	T	0.0347983	0.582813	2.2e-37	7213	0.0456137	0.0221326	163.21
P55001	MFAP2	rs910214	C	0.47858	0.393641	1.23e-129	7213	0.0162497	0.0752355	586.661
P55008	AIF1	rs3130623	T	0.187647	0.200887	5.49e-21	7213	0.0213724	0.0121002	88.3233
P55058	PLTP	rs111602331	C	0.184597	-0.738606	1e-200	7213	0.0244341	0.112439	913.509
P55083	MFAP4	rs139356332	C	0.0215583	-0.866868	1.05e-52	7213	0.0567347	0.0313516	233.393
P55103	INHBC	rs2229357	A	0.235616	-1.16205	1e-200	7213	0.0384422	0.112439	913.509
P55145	MANF	rs4611808	C	0.137807	-0.356673	8.21e-50	7213	0.0240364	0.0296229	220.132
P55263	ADK	rs12571531	G	0.198877	0.123916	2.42e-09	7213	0.0207677	0.00491161	35.5924
P55773	CCL23	rs712048	A	0.129835	-0.563536	3.18e-119	7213	0.0242742	0.0695252	538.807
P55774	CCL18	rs2015086	G	0.138639	0.855831	1e-200	7213	0.028312	0.112439	913.509
P55854	SUMO3	rs8133302	C	0.227298	0.216968	9.93e-28	7213	0.0198806	0.0162444	119.073
P56159	GFRA1	rs10885876	G	0.290864	0.339095	2.77e-78	7213	0.0181035	0.0463849	350.751
P56279	TCL1A	rs78986913	A	0.0456121	-0.492879	3.37e-35	7213	0.0398138	0.020805	153.212
P56470	LGALS4	rs9304578	A	0.471995	-0.273497	7.17e-63	7213	0.0163419	0.03738	280.014
P58062	SPINK7	rs9784645	T	0.265285	0.293556	6.3e-56	7213	0.018632	0.0332699	248.166
P58215	LOXL3	rs17010021	A	0.0367392	-0.290539	5.63e-11	7213	0.0443351	0.0059186	42.9331
P58335	ANTXR2	rs10009674	A	0.249896	0.379264	3.83e-91	7213	0.0187325	0.0537737	409.799
P58499	FAM3B	rs57529409	T	0.0526133	-1.08511	1e-200	7213	0.0358969	0.112439	913.509
P58753	TIRAP	rs8177399	T	0.0237765	-1.35517	1.55e-143	7213	0.0531243	0.0827508	650.55
P59901	LILRA4	rs12976217	T	0.356162	0.4063	3.64e-124	7213	0.0171437	0.0722437	561.515
P60022	DEFB1	rs2741117	G	0.49494	-0.416227	2.81e-144	7213	0.016274	0.0831484	653.959
P60174	TPI1	rs2071066	C	0.297033	-0.353781	9.39e-86	7213	0.0180267	0.0506906	385.048
P60520	GABARAPL2	rs2454867	C	0.116872	-0.303645	6.65e-32	7213	0.025831	0.0187972	138.144
P61086	UBE2K	rs58339883	C	0.129974	0.265989	3.1e-27	7213	0.0246067	0.0159413	116.815
P61088	UBE2N	rs2291266	A	0.16595	-0.400189	1.27e-74	7213	0.0218962	0.0442605	333.943
P61244	MAX	rs762810	A	0.343962	-0.39197	1.74e-117	7213	0.0170106	0.0685653	530.82
P61457	PCBD1	rs72816586	T	0.0402745	-0.714534	9.25e-65	7213	0.0420487	0.0384927	288.683
P61647	ST8SIA6	rs11595070	C	0.0355608	-0.371752	9.98e-17	7213	0.0447623	0.0094718	68.9543
P61981	YWHAG	rs73140051	A	0.280466	-0.118233	1.41e-10	7213	0.0184313	0.00567258	41.1384
P62820	RAB1A	rs7607039	A	0.258076	-0.251404	1.48e-40	7213	0.0188552	0.0240542	177.73
P62937	PPIA	rs62460480	G	0.0725773	-0.387659	1.56e-33	7213	0.0321231	0.019791	145.595
P62993	GRB2	rs9889402	G	0.283031	-0.133859	2.99e-13	7213	0.0183498	0.00732359	53.2
P63000	RAC1	rs4724795	A	0.290032	0.151851	1.01e-16	7213	0.0182874	0.0094686	68.9307
P63241	EIF5A	rs11658072	C	0.37883	0.195134	2.77e-30	7213	0.0170634	0.0178079	130.741
P63279	UBE2I	rs2401949	A	0.275683	-0.261959	4.75e-45	7213	0.0185995	0.0267649	198.31
P63302	SEPW1	rs11879299	T	0.492306	-0.311165	1.86e-78	7213	0.0165936	0.046485	351.545
P68106	FKBP1B	rs72781698	T	0.205878	-0.630194	1e-200	7213	0.0208477	0.112439	913.509
P78314	SH3BP2	rs7695151	T	0.467628	0.176218	1.92e-26	7213	0.0165602	0.0154556	113.2
P78324	SIRPA	rs6136376	G	0.376057	-1.05266	1e-200	7213	0.0348234	0.112439	913.509
P78333	GPC5	rs342706	C	0.277	-0.686856	1e-200	7213	0.0227221	0.112439	913.509
P78417	GSTO1	rs641071	T	0.368155	-0.930001	1e-200	7213	0.0307657	0.112439	913.509
P78423	CX3CL1	rs62037115	A	0.0103979	1.11873	2.06e-42	7213	0.0819671	0.0251757	186.231
P78504	JAG1	rs2423507	G	0.36656	0.108984	3.62e-10	7213	0.017383	0.00542003	39.2969
P78560	CRADD	rs60169972	C	0.186469	-0.149609	2.04e-12	7213	0.0212763	0.00680833	49.4314
P80075	CCL8	rs3138037	C	0.167267	-1.12245	1e-200	7213	0.0371322	0.112439	913.509
P80098	CCL7	rs3138037	C	0.167267	-0.659528	1e-200	7213	0.0218181	0.112439	913.509
P80162	CXCL6	rs16850073	T	0.371621	0.624649	1e-200	7213	0.0206642	0.112439	913.509
P80370	DLK1	rs12881545	G	0.329613	-0.484803	1.48e-176	7213	0.0171128	0.100128	802.361
P80511	S100A12	rs3014874	A	0.251698	-0.278032	1.67e-48	7213	0.0189972	0.0288393	214.135
P82980	RBP5	rs2290239	G	0.315403	-0.378575	7.91e-104	7213	0.017496	0.0609536	468.067
P84157	MXRA7	rs4789345	T	0.369264	0.496034	6.04e-194	7213	0.0166969	0.109019	882.325
P98066	TNFAIP6	rs2278089	G	0.402052	0.45787	3.28e-172	7213	0.0163672	0.0978785	782.38
P98160	HSPG2	rs12742444	T	0.0589214	0.731954	7.09e-97	7213	0.0350442	0.0570317	436.129
Q00796	SORD	rs56060952	C	0.11916	0.467346	4.35e-76	7213	0.025317	0.0451118	340.669
Q00872	MYBPC1	rs80087033	A	0.1568	-0.202723	3.79e-19	7213	0.0226685	0.0109662	79.9537
Q00887	PSG9	rs4802159	T	0.059268	-0.550983	4.9e-57	7213	0.034618	0.0339286	253.252
Q00888	PSG4	rs4802160	G	0.354291	0.713441	1e-200	7213	0.0236016	0.112439	913.509
Q01344	IL5RA	rs77400868	G	0.138361	0.500071	2.15e-99	7213	0.0236309	0.0584559	447.696
Q01638	IL1RL1	rs13020553	G	0.373354	-0.653433	1e-200	7213	0.0216164	0.112439	913.509
Q01973	ROR1	rs2224876	G	0.17205	-0.653146	1e-200	7213	0.021607	0.112439	913.509
Q01974	ROR2	rs10118816	T	0.327118	0.34275	7.11e-84	7213	0.0176637	0.0496109	376.419
Q02083	NAAA	rs28451731	T	0.241092	-0.815525	1e-200	7213	0.0269787	0.112439	913.509
Q02223	TNFRSF17	rs387871	A	0.494039	-0.167918	2.53e-24	7213	0.0165009	0.0141538	103.528
Q02246	CNTN2	rs3753847	T	0.155968	0.84936	1e-200	7213	0.028098	0.112439	913.509
Q02487	DSC2	rs1789064	A	0.238528	0.371646	5.35e-83	7213	0.0192561	0.0491066	372.394
Q02750	MAP2K1	rs77428206	A	0.0954527	0.179974	2.58e-10	7213	0.0284674	0.00551074	39.9581
Q02763	TEK	rs35030851	T	0.0438098	0.859212	1.45e-101	7213	0.0401573	0.0596805	457.67
Q02790	FKBP4	rs56196860	A	0.0289755	-1.06599	1.12e-105	7213	0.048824	0.0619912	476.561
Q02818	NUCB1	rs28450126	A	0.121309	-0.385366	2.43e-52	7213	0.0253121	0.0311342	231.723
Q03013	GSTM4	rs687643	C	0.482532	-0.391214	1.33e-125	7213	0.016411	0.0730315	568.121
Q03154	ACY1	rs148804382	A	0.0125468	-0.679851	5.14e-20	7213	0.0742111	0.0115014	83.9014
Q03167	TGFBR3	rs79859654	G	0.214405	0.189129	7.52e-21	7213	0.0201927	0.012016	87.7011
Q03403	TFF2	rs58206891	G	0.179814	-0.125366	5.26e-09	7213	0.0214714	0.00470406	34.0813
Q03405	PLAUR	rs2302524	C	0.162484	-0.415355	1.05e-79	7213	0.0219714	0.047207	357.276
Q03591	CFHR1	rs7519758	T	0.205046	-0.939936	1e-200	7213	0.0310944	0.112439	913.509
Q03692	COL10A1	rs9488842	C	0.26577	-0.362481	1.9e-84	7213	0.0186156	0.0499405	379.051
Q04609	FOLH1	rs55728336	C	0.0506724	0.341771	2.31e-19	7213	0.0379853	0.0110988	80.9318
Q04756	HGFAC	rs2498323	A	0.0991266	-1.33214	1e-200	7213	0.044069	0.112439	913.509
Q04760	GLO1	rs12209477	G	0.38188	-0.194455	2.92e-30	7213	0.0170109	0.0177939	130.636
Q04917	YWHAH	rs5994442	T	0.257175	-0.106774	1.56e-08	7213	0.0188819	0.00441369	31.9682
Q06033	ITIH3	rs2535629	A	0.344517	0.684643	1e-200	7213	0.0226489	0.112439	913.509
Q06141	REG3A	rs114874655	A	0.0587828	0.465378	9.05e-40	7213	0.0352622	0.0235785	174.13
Q06418	TYRO3	rs2588323	C	0.305559	0.25169	5.23e-44	7213	0.0180894	0.0261377	193.537
Q06481	APLP2	rs61349706	C	0.0538611	0.409769	5.29e-29	7213	0.0366621	0.0170243	124.889
Q06520	SULT2A1	rs296384	G	0.151393	-0.364053	2.35e-56	7213	0.0230156	0.0335244	250.13
Q06828	FMOD	rs4971252	G	0.12727	-0.440737	1.46e-71	7213	0.0246386	0.0424777	319.895
Q06830	PRDX1	rs11211133	A	0.232081	0.357692	1.28e-73	7213	0.0197074	0.0436767	329.337
Q07075	ENPEP	rs33966350	A	0.0133093	-1.82228	5.93e-148	7213	0.0703462	0.0851139	670.856
Q07325	CXCL9	rs884304	A	0.289131	-0.115804	3.17e-10	7213	0.0184101	0.00545558	39.556
Q07507	DPT	rs1018454	A	0.423125	-0.431681	1.21e-152	7213	0.0164028	0.0876099	692.418
Q07820	MCL1	rs190596489	C	0.0128241	-1.31999	7.79e-72	7213	0.0736475	0.0426369	321.148
Q07866	KLC1	rs2273175	C	0.323167	0.110967	2.26e-10	7213	0.0174957	0.0055462	40.2167
Q07960	ARHGAP1	rs11039024	T	0.138431	-0.138597	8.28e-09	7213	0.0240509	0.00458284	33.199
Q08257	CRYZ	rs3819946	C	0.1385	1.07253	1e-200	7213	0.0354807	0.112439	913.509
Q08334	IL10RB	rs2515717	A	0.448634	0.233191	8.8e-45	7213	0.0166084	0.0266038	197.083
Q08380	LGALS3BP	rs3826311	C	0.178982	0.218327	6.79e-24	7213	0.02166	0.0138902	101.573
Q08431	MFGE8	rs34239095	G	0.279703	0.442825	1.33e-130	7213	0.0182113	0.0757617	591.101
Q08708	CD300C	rs62087200	A	0.049286	-0.764918	1.28e-90	7213	0.0378921	0.0534748	407.392
Q08752	PPID	rs17843929	T	0.264661	0.879733	1e-200	7213	0.0291028	0.112439	913.509
Q08830	FGL1	rs3739406	T	0.310134	-0.72243	1e-200	7213	0.023899	0.112439	913.509
Q08ET2	SIGLEC14	rs872629	A	0.119506	-1.00953	1e-200	7213	0.0333966	0.112439	913.509
Q10469	MGAT2	rs12147470	T	0.453695	-0.274587	2.91e-61	7213	0.0166275	0.036431	272.636
Q10588	BST1	rs6842052	G	0.160336	-1.20899	1e-200	7213	0.039995	0.112439	913.509
Q11128	FUT5	rs778809	A	0.330306	-0.509359	1.4e-192	7213	0.0172068	0.108327	876.047
Q11201	ST3GAL1	rs9643300	C	0.434147	0.357289	1e-101	7213	0.0166852	0.0597714	458.411
Q12794	HYAL1	rs116482870	T	0.0656454	-0.362857	5.08e-27	7213	0.0337096	0.0158098	115.836
Q12797	ASPH	rs11775077	A	0.177319	-0.331558	3.69e-52	7213	0.021817	0.0310259	230.891
Q12805	EFEMP1	rs3791679	G	0.240191	0.427352	3.78e-109	7213	0.0192538	0.0639334	492.512
Q12841	FSTL1	rs916510	C	0.277901	0.168963	1.33e-19	7213	0.0186537	0.0112467	82.0226
Q12860	CNTN1	rs11177604	A	0.386732	0.289771	7.91e-66	7213	0.0169094	0.0391205	293.583
Q12864	CDH17	rs12056840	A	0.469777	-0.340079	2.4e-95	7213	0.0164149	0.0561646	429.103
Q12884	FAP	rs12477178	A	0.0133093	1.11477	2.05e-54	7213	0.0717643	0.0323703	241.231
Q12907	LMAN2	rs28419182	G	0.212672	-0.138173	1.03e-11	7213	0.0203128	0.006374	46.2577
Q12913	PTPRJ	rs1566734	C	0.15992	0.232257	6.04e-25	7213	0.0225168	0.0145361	106.366
Q12918	KLRB1	rs2241006	A	0.412034	-0.389975	2.63e-120	7213	0.0167211	0.0701221	543.782
Q13011	ECH1	rs2229259	T	0.108693	0.703511	2.1e-160	7213	0.0260685	0.0917102	728.096
Q13018	PLA2R1	rs3749117	T	0.493623	0.744998	1e-200	7213	0.0246455	0.112439	913.509
Q13045	FLII	rs145840264	T	0.0252322	0.611659	9.88e-32	7213	0.0521823	0.0186923	137.358
Q13046	PSG7	rs1209671921	G	0.159296	0.18469	6.77e-17	7213	0.022116	0.00957591	69.7195
Q13093	PLA2G7	rs953062	G	0.324553	0.130824	2.38e-13	7213	0.0178587	0.00738482	53.6482
Q13136	PPFIA1	rs12577692	G	0.325731	-0.133938	6.18e-14	7213	0.0178484	0.0077467	56.2976
Q13137	CALCOCO2	rs318100	G	0.160543	-0.281609	4.57e-36	7213	0.0224587	0.0213325	157.182
Q13231	CHIT1	rs872583	C	0.206294	-0.97891	1e-200	7213	0.0323837	0.112439	913.509
Q13253	NOG	rs227715	G	0.232843	-0.17296	1.31e-18	7213	0.0196437	0.0106338	77.5043
Q13261	IL15RA	rs8177643	T	0.317482	0.15904	1.97e-19	7213	0.0176418	0.0111415	81.2464
Q13283	G3BP1	rs2964584	C	0.25052	-0.190465	9.63e-24	7213	0.0189605	0.0137969	100.881
Q13287	NMI	rs6713190	C	0.484195	-0.195191	3.86e-32	7213	0.0165403	0.0189414	139.223
Q13291	SLAMF1	rs6704124	T	0.331901	0.116482	4.05e-11	7213	0.0176428	0.00600689	43.5774
Q13308	PTK7	rs140927825	T	0.0359767	0.549598	9.99e-36	7213	0.0440495	0.0211261	155.628
Q13426	XRCC4	rs1056503	G	0.11403	0.31539	2.02e-33	7213	0.0261807	0.0197227	145.081
Q13442	PDAP1	rs28495024	C	0.123458	-0.178251	1.94e-12	7213	0.0253243	0.00682181	49.53
Q13449	LSAMP	rs1835674	T	0.176071	-0.348407	3.53e-58	7213	0.0216672	0.0346063	258.491
Q13478	IL18R1	rs11465583	C	0.242825	0.873465	1e-200	7213	0.0288954	0.112439	913.509
Q13508	ART3	rs4859610	A	0.225912	0.397073	5.77e-93	7213	0.0194149	0.0548116	418.167
Q13522	PPP1R1A	rs10876568	C	0.210453	0.148809	3.25e-13	7213	0.0204307	0.00730121	53.0363
Q13557	CAMK2D	rs3822295	C	0.124913	-0.140797	2.69e-08	7213	0.0253209	0.00426829	30.9106
Q13586	STIM1	rs1869085	C	0.30757	-0.122929	7.75e-12	7213	0.0179639	0.00645028	46.815
Q13591	SEMA5A	rs56015217	T	0.0895605	0.939395	1e-200	7213	0.0310765	0.112439	913.509
Q13596	SNX1	rs138194169	C	0.021489	0.679498	9.16e-33	7213	0.0569984	0.0193224	142.079
Q13740	ALCAM	rs751554	T	0.116526	-0.350204	1.53e-41	7213	0.0259379	0.0246499	182.243
Q13753	LAMC2	rs2276543	A	0.276445	0.733742	1e-200	7213	0.0242732	0.112439	913.509
Q13790	APOF	rs2066818	A	0.0680715	-0.602174	5.51e-76	7213	0.0326434	0.0450522	340.198
Q13822	ENPP2	rs13267597	G	0.323582	-0.191541	2.72e-27	7213	0.0176999	0.0159762	117.074
Q13884	SNTB1	rs6982091	A	0.322473	-0.120568	1.2e-11	7213	0.0177823	0.00633303	45.9585
Q13907	IDI1	rs4880760	G	0.0304312	-0.350284	2.93e-13	7213	0.0480001	0.00732903	53.2398
Q14005	IL16	rs4778639	G	0.0802717	-1.40934	1e-200	7213	0.0466229	0.112439	913.509
Q14112	NID2	rs941622	G	0.458894	-0.507152	1e-200	7213	0.0167773	0.112439	913.509
Q14114	LRP8	rs7542607	G	0.418827	0.255027	3.07e-52	7213	0.0167679	0.0310736	231.257
Q14126	DSG2	rs1460602	T	0.385485	-0.350854	7.05e-97	7213	0.0167978	0.0570331	436.14
Q14162	SCARF1	rs2272011	G	0.407251	0.821118	1e-200	7213	0.0271637	0.112439	913.509
Q14213	EBI3	rs4905	G	0.281436	-1.04542	1e-200	7213	0.0345839	0.112439	913.509
Q14232	EIF2B1	rs117647122	T	0.0148343	-0.554848	4.29e-16	7213	0.0682463	0.00908055	66.0799
Q14242	SELPLG	rs73191242	A	0.191321	-0.355148	3.12e-63	7213	0.0211581	0.037593	281.672
Q14392	LRRC32	rs12275758	A	0.0762512	-0.172226	4.11e-08	7213	0.0313934	0.00415524	30.0885
Q14393	GAS6	rs6602909	C	0.322335	-0.405253	1.16e-118	7213	0.0174982	0.069215	536.224
Q14397	GCKR	rs1260326	T	0.406558	-0.197844	1.35e-31	7213	0.0169168	0.0186095	136.738
Q14435	GALNT3	rs7590559	T	0.391169	0.0936173	2.29e-08	7213	0.0167517	0.00431125	31.223
Q14507	EDDM3A	rs34552133	T	0.107999	-0.220957	1.35e-16	7213	0.0267209	0.00939076	68.3587
Q14508	WFDC2	rs6032226	T	0.489949	-0.101732	1.22e-09	7213	0.0167389	0.00509482	36.9269
Q14512	FGFBP1	rs73230203	A	0.0925412	0.192551	1.88e-11	7213	0.0286745	0.00621264	45.0794
Q14515	SPARCL1	rs7688567	A	0.3615	0.642186	1e-200	7213	0.0212444	0.112439	913.509
Q14554	PDIA5	rs3804749	C	0.414044	1.00175	1e-200	7213	0.0331392	0.112439	913.509
Q14558	PRPSAP1	rs9907526	C	0.186053	0.12222	8.4e-09	7213	0.0212179	0.004579	33.171
Q14574	DSC3	rs35630063	C	0.0211424	-0.338506	4.84e-09	7213	0.0578387	0.0047263	34.2432
Q14624	ITIH4	rs3617	A	0.457993	0.16143	2.39e-22	7213	0.0166018	0.0129386	94.5236
Q14626	IL11RA	rs11575578	A	0.0639817	0.943428	2.71e-181	7213	0.0328584	0.102567	824.145
Q14653	IRF3	rs10415576	C	0.372591	-0.452409	2.61e-161	7213	0.0167162	0.0921863	732.26
Q14677	CLINT1	rs12284	G	0.136767	-0.246025	7.48e-25	7213	0.0238993	0.014479	105.942
Q14696	MESDC2	rs1012540	T	0.0483849	-0.439129	1.04e-29	7213	0.038791	0.0174566	128.116
Q14749	GNMT	rs2395943	A	0.420006	0.428481	7.7e-147	7213	0.0166043	0.0845194	665.737
Q14914	PTGR1	rs76781427	C	0.0456121	1.12077	3.25e-186	7213	0.0385099	0.105088	846.774
Q14956	GPNMB	rs28458177	A	0.379315	-0.30341	7.49e-71	7213	0.0170486	0.0420632	316.636
Q14C87	TMEM132D	rs7299188	G	0.370512	0.170914	2.95e-23	7213	0.0172043	0.0134978	98.6646
Q14DG7	TMEM132B	rs3825381	T	0.256828	-0.327018	1.01e-67	7213	0.0188067	0.0402319	302.273
Q15063	POSTN	rs7329947	A	0.381603	0.240615	1.23e-45	7213	0.0169694	0.0271179	200.998
Q15109	AGER	rs2070600	T	0.0474837	-0.741764	2.8e-81	7213	0.0388468	0.048116	364.503
Q15113	PCOLCE	rs7385804	C	0.368779	-0.225072	3.49e-39	7213	0.0171869	0.0232236	171.447
Q15172	PPP2R5A	rs11119862	G	0.164079	0.155083	8.74e-12	7213	0.0227199	0.00641804	46.5794
Q15181	PPA1	rs12570967	T	0.0485928	-0.227206	3.41e-09	7213	0.0384409	0.00481991	34.9247
Q15198	PDGFRL	rs77670928	T	0.0361847	-0.825112	3.43e-78	7213	0.0440775	0.0463311	350.325
Q15238	PSG5	rs7253874	A	0.368363	-0.612888	1e-200	7213	0.0202752	0.112439	913.509
Q15389	ANGPT1	rs1461993	A	0.359074	0.138851	5.2e-16	7213	0.0171279	0.00902893	65.7009
Q15399	TLR1	rs5743618	A	0.274851	0.290832	4.91e-56	7213	0.0184407	0.0333342	248.662
Q15465	SHH	rs872723	T	0.156384	-0.193114	2.15e-17	7213	0.0227584	0.00988357	71.9818
Q15485	FCN2	rs57136797	T	0.143283	-0.723795	1e-200	7213	0.0239441	0.112439	913.509
Q15555	MAPRE2	rs1443641	T	0.443089	-0.371504	1.76e-113	7213	0.0164094	0.0663458	512.417
Q15582	TGFBI	rs13159365	C	0.483571	0.66756	1e-200	7213	0.0220838	0.112439	913.509
Q15642	TRIP10	rs8106212	T	0.0142798	0.561283	1.26e-15	7213	0.070174	0.00879145	63.9574
Q15661	TPSAB1	rs35116045	T	0.370789	0.358361	1.04e-99	7213	0.016907	0.058634	449.145
Q15691	MAPRE1	rs414049	C	0.286219	-0.517638	2.3e-189	7213	0.0176359	0.106694	861.26
Q15782	CHI3L2	rs11556868	T	0.121239	0.294902	2.81e-31	7213	0.0253511	0.0184151	135.283
Q15796	SMAD2	rs11874858	A	0.46534	0.135265	6.69e-16	7213	0.0167489	0.00896133	65.2045
Q15797	SMAD1	rs2118438	A	0.195411	0.12324	3.7e-09	7213	0.0208985	0.00479809	34.7659
Q15813	TBCE	rs4469707	T	0.346943	0.403095	3.01e-122	7213	0.0171436	0.0711907	552.703
Q15818	NPTX1	rs111307499	G	0.0833911	0.670141	7.48e-115	7213	0.0294198	0.0671071	518.719
Q15828	CST6	rs12577165	C	0.0256481	0.616729	2.45e-31	7213	0.0529635	0.0184515	135.555
Q15848	ADIPOQ	rs76071583	G	0.0277277	-0.88664	9.66e-70	7213	0.0502262	0.0414142	311.54
Q15942	ZYX	rs7801889	C	0.381741	0.107615	2.29e-10	7213	0.0169726	0.00554267	40.191
Q16270	IGFBP7	rs1718860	G	0.256412	0.529674	1.52e-176	7213	0.0186973	0.100122	802.308
Q16288	NTRK3	rs28714295	A	0.128795	0.450297	1.01e-74	7213	0.024621	0.0443184	334.4
Q16539	MAPK14	rs12200998	G	0.465548	-0.146343	1.91e-18	7213	0.0167011	0.0105327	76.7598
Q16549	PCSK7	rs171052	G	0.233259	-0.978177	1e-200	7213	0.0323594	0.112439	913.509
Q16557	PSG3	rs2355433	A	0.454388	0.711818	1e-200	7213	0.0235479	0.112439	913.509
Q16610	ECM1	rs3737240	T	0.400735	-0.844053	1e-200	7213	0.0279224	0.112439	913.509
Q16620	NTRK2	rs1624327	A	0.267572	-0.133728	1.29e-12	7213	0.0188472	0.00693129	50.3304
Q16627	CCL14	rs7222922	T	0.110218	-1.0676	1e-200	7213	0.0353177	0.112439	913.509
Q16651	PRSS8	rs1060506	T	0.294191	0.124778	9.38e-12	7213	0.0183074	0.00639909	46.441
Q16661	GUCA2B	rs1047047	G	0.153473	0.213397	1.24e-20	7213	0.0229133	0.0118821	86.7122
Q16663	CCL15	rs854624	G	0.077291	1.41036	1e-200	7213	0.0466566	0.112439	913.509
Q16666	IFI16	rs856051	T	0.180577	-0.242172	1.95e-29	7213	0.0214974	0.0172896	126.869
Q16674	MIA	rs2233159	C	0.0710523	1.36764	1e-200	7213	0.0452434	0.112439	913.509
Q16698	DECR1	rs1805806	C	0.360044	-0.193941	1.26e-29	7213	0.0171575	0.0174056	127.735
Q16719	KYNU	rs112211045	A	0.171635	-0.879417	1e-200	7213	0.0290923	0.112439	913.509
Q16769	QPCT	rs75573663	C	0.0106059	-1.2178	2.42e-52	7213	0.0799878	0.0311352	231.731
Q16774	GUK1	rs4653908	T	0.0422848	1.32568	1e-200	7213	0.0438553	0.112439	913.509
Q16775	HAGH	rs13166	G	0.141758	0.561284	2.12e-125	7213	0.0235645	0.0729206	567.19
Q16831	UPP1	rs10278152	T	0.461666	-0.144709	6.16e-18	7213	0.016769	0.0102188	74.4483
Q16836	HADH	rs72890511	C	0.0790933	0.260889	1.98e-17	7213	0.030711	0.00990566	72.1443
Q16881	TXNRD1	rs7298739	T	0.447941	0.139226	8.97e-17	7213	0.0167386	0.00950042	69.1647
Q24JP5	TMEM132A	rs555835	T	0.371482	-0.698568	1e-200	7213	0.0231096	0.112439	913.509
Q29980	MICB	rs3094010	T	0.117427	-0.896769	1e-200	7213	0.0296663	0.112439	913.509
Q29983	MICA	rs2523496	C	0.481908	-0.811746	1e-200	7213	0.0268537	0.112439	913.509
Q2I0M5	RSPO4	rs75904281	T	0.0146264	-0.685955	6.71e-23	7213	0.069625	0.0132782	97.0377
Q2M296	MTHFSD	rs9937599	A	0.39609	-0.436248	5.98e-152	7213	0.0166147	0.0872415	689.228
Q2MKA7	RSPO1	rs36043533	G	0.051019	0.760438	1.74e-92	7213	0.0372799	0.0545388	415.965
Q2TAL6	VWC2	rs1876569	T	0.142798	-0.639182	6.48e-173	7213	0.0228012	0.0982438	785.618
Q3ZCW2	HSPC159	rs76392037	C	0.0528906	0.57949	1.82e-55	7213	0.0369378	0.032996	246.053
Q495A1	TIGIT	rs6792290	G	0.296825	0.125569	4.16e-12	7213	0.0181153	0.00661717	48.0343
Q49AH0	CDNF	rs61738953	G	0.0352835	-1.09924	9.74e-137	7213	0.0441653	0.0790902	619.3
Q4G0W2	DUSP28	rs148245427	G	0.0161514	-1.56543	3.08e-128	7213	0.0649789	0.0744725	580.232
Q4G148	GXYLT1	rs139695917	C	0.0138639	1.68275	5.76e-128	7213	0.069924	0.074324	578.983
Q4KMG0	CDON	rs112978541	C	0.0876196	-1.03696	1e-200	7213	0.034304	0.112439	913.509
Q4LDE5	SVEP1	rs61751937	C	0.0300846	1.10566	1.96e-118	7213	0.0477873	0.0690892	535.178
Q504Y2	PKDCC	rs2424	A	0.217801	0.38507	2.11e-83	7213	0.0199021	0.0493392	374.25
Q53FA7	TP53I3	rs10191964	A	0.1629	-0.991794	1e-200	7213	0.0328099	0.112439	913.509
Q53S33	BOLA3	rs1620482	C	0.415084	-0.119896	1.27e-12	7213	0.0168926	0.00693549	50.3611
Q5GFL6	VWA2	rs35060624	T	0.0811729	0.463603	1.34e-53	7213	0.0300788	0.0318846	237.492
Q5JXM2	METTL24	rs7767851	T	0.0915708	-0.291075	2.53e-24	7213	0.0286032	0.0141538	103.528
Q5JZY3	EPHA10	rs12074120	G	0.309719	0.155682	8.43e-18	7213	0.0181161	0.0101346	73.8292
Q5KU26	COLEC12	rs2846666	C	0.276099	-0.222127	1.17e-32	7213	0.0186646	0.0192576	141.593
Q5QGZ9	CLEC12A	rs1060648	C	0.369264	1.06488	1e-200	7213	0.0352277	0.112439	913.509
Q5SRI9	MANEA	rs35772543	A	0.0835297	-1.44736	1e-200	7213	0.0478806	0.112439	913.509
Q5SW96	LDLRAP1	rs4523506	T	0.459102	-0.358204	9.04e-104	7213	0.0165592	0.060921	467.8
Q5SZK8	FREM2	rs9603416	A	0.305421	0.155925	2.63e-18	7213	0.0178683	0.0104469	76.1282
Q5T2D2	TREML2	rs4714431	C	0.358727	0.505081	8.54e-200	7213	0.0167481	0.11197	909.226
Q5VWK5	IL23R	rs12569203	A	0.450575	0.101877	7.45e-10	7213	0.0165486	0.00522681	37.8886
Q5VXI9	LIPN	rs10509554	T	0.311382	0.806182	1e-200	7213	0.0266696	0.112439	913.509
Q5VY43	PEAR1	rs12041331	A	0.0863025	-0.541775	3.98e-76	7213	0.0293413	0.0451342	340.847
Q63HQ2	EGFLAM	rs2434498	T	0.231249	-0.198109	4.98e-24	7213	0.019595	0.013973	102.187
Q66K79	CPZ	rs6845969	T	0.340219	-0.144787	3.28e-16	7213	0.0177379	0.00915258	66.6089
Q6B8I1	DUSP13	rs6480771	C	0.406904	-0.307987	2.45e-75	7213	0.0167692	0.0446759	337.224
Q6BAA4	FCRLB	rs61801180	C	0.0538611	0.697481	3.88e-81	7213	0.0365603	0.0480342	363.852
Q6BCY4	CYB5R2	rs7942293	G	0.362263	-0.535655	1e-200	7213	0.0177202	0.112439	913.509
Q6DN72	FCRL6	rs6656979	A	0.192638	-0.470415	7.36e-114	7213	0.0207431	0.0665561	514.156
Q6E0U4	DMKN	rs7408798	A	0.107098	-0.212346	6.64e-15	7213	0.0272548	0.00834542	60.6852
Q6EMK4	VASN	rs757593	A	0.270692	-0.133906	9.79e-13	7213	0.0187716	0.00700531	50.8717
Q6FHJ7	SFRP4	rs75207237	A	0.124289	0.402321	1.08e-57	7213	0.0251286	0.0343183	256.264
Q6GPI1	CTRB2	rs8048956	G	0.193054	0.961322	1e-200	7213	0.0318018	0.112439	913.509
Q6IQ23	PLEKHA7	rs1638457	T	0.106336	0.389561	9.69e-48	7213	0.0268379	0.0283814	210.636
Q6MZW2	FSTL4	rs111914149	A	0.267503	0.144165	1.61e-14	7213	0.0187752	0.00810771	58.9426
Q6NUJ1	PSAPL1	rs35791045	G	0.170872	0.578542	6.7e-160	7213	0.021472	0.0914451	725.78
Q6NVY1	HIBCH	rs291466	A	0.405587	-0.827138	1e-200	7213	0.0273628	0.112439	913.509
Q6NW40	RGMB	rs2368553	C	0.452655	-0.339456	3.17e-95	7213	0.0163955	0.056096	428.548
Q6P179	ERAP2	rs2910686	C	0.427977	0.98165	1e-200	7213	0.0324743	0.112439	913.509
Q6P4F1	FUT10	rs2732317	A	0.384583	0.784589	1e-200	7213	0.0259553	0.112439	913.509
Q6P587	FAHD1	rs3743853	A	0.158741	-0.326481	9.9e-48	7213	0.0224944	0.0283758	210.594
Q6P988	NOTUM	rs111343749	A	0.0440871	-0.267293	3.78e-11	7213	0.0404227	0.00602538	43.7124
Q6P995	FAM171B	rs12612335	A	0.183003	-0.264785	1.65e-35	7213	0.0212905	0.0209936	154.631
Q6PCB0	VWA1	rs116279124	T	0.0137252	-1.60513	7.64e-114	7213	0.0707838	0.0665471	514.082
Q6PI48	DARS2	rs12564699	A	0.284625	-0.301577	1.51e-60	7213	0.0183728	0.0360085	269.356
Q6PI73	LILRA6	rs34810796	C	0.0884514	1.07816	1e-200	7213	0.035667	0.112439	913.509
Q6Q788	APOA5	rs3135506	C	0.0649522	1.32942	1e-200	7213	0.043979	0.112439	913.509
Q6UW15	REG3G	rs430298	T	0.218148	0.584061	1.9e-197	7213	0.019483	0.110788	898.431
Q6UWB1	IL27RA	rs35026308	C	0.163386	-1.01263	1e-200	7213	0.0334992	0.112439	913.509
Q6UWL6	KIRREL2	rs35854130	T	0.208096	-0.17087	6.34e-17	7213	0.0204421	0.00959351	69.8489
Q6UWN8	SPINK6	rs11741093	C	0.0736171	-1.01238	1e-200	7213	0.0334909	0.112439	913.509
Q6UWV6	ENPP7	rs8077074	T	0.313046	0.946027	1e-200	7213	0.0312959	0.112439	913.509
Q6UWY0	ARSK	rs956274	T	0.362055	-0.133637	6.67e-15	7213	0.0171537	0.00834421	60.6764
Q6UWY2	PRSS57	rs2301741	C	0.491751	-0.332643	1.4e-91	7213	0.0163897	0.0540229	411.806
Q6UX15	LAYN	rs4938792	C	0.391515	-0.249856	3.92e-50	7213	0.0167819	0.029815	221.603
Q6UX41	BTNL8	rs2387717	A	0.479412	-0.374847	2.53e-117	7213	0.0162789	0.0684754	530.073
Q6UXB4	CLEC4G	rs115293707	C	0.073825	0.542015	4.55e-67	7213	0.0313269	0.0398485	299.273
Q6UXI7	VIT	rs1468810	C	0.412242	0.520041	1e-200	7213	0.0172037	0.112439	913.509
Q6UXI9	NPNT	rs34712979	A	0.245182	-0.387159	5.19e-92	7213	0.0190301	0.0542685	413.785
Q6UXK2	ISLR2	rs4887134	A	0.403438	0.289794	5.6e-68	7213	0.0166336	0.040382	303.448
Q6UXM1	LRIG3	rs11172791	C	0.0444337	-0.846134	2.38e-101	7213	0.0395888	0.0595592	456.681
Q6UXV0	GFRAL	rs73439277	A	0.140233	0.29143	3.43e-34	7213	0.0239034	0.0201917	148.603
Q6UXZ4	UNC5D	rs3108622	A	0.433176	-0.290632	1.81e-68	7213	0.0166202	0.0406693	305.699
Q6UY11	DLK2	rs2125739	C	0.259254	-0.413378	6.65e-112	7213	0.0183895	0.0654689	505.169
Q6WN34	CHRDL2	rs61389091	T	0.0420075	-0.751669	2.61e-74	7213	0.041216	0.0440786	332.507
Q6Y288	B3GALTL	rs4943306	C	0.226951	-0.346313	3.88e-69	7213	0.0197057	0.0410609	308.769
Q6YHK3	CD109	rs6925924	C	0.49487	0.729675	1e-200	7213	0.0241386	0.112439	913.509
Q6YP21	CCBL2	rs12130865	A	0.497227	-0.186871	2.06e-29	7213	0.0165955	0.017275	126.76
Q6ZMC9	SIGLEC15	rs515373	A	0.483363	0.136359	5.89e-16	7213	0.016852	0.0089955	65.4554
Q6ZMJ2	SCARA5	rs2685422	A	0.291557	-0.253335	7.73e-44	7213	0.0182443	0.0260355	192.76
Q6ZRP7	QSOX2	rs10858248	G	0.495979	-0.456393	1.59e-171	7213	0.0163473	0.0975226	779.228
Q6ZVL6	KIAA1549L	rs2753408	A	0.469638	-0.545943	1e-200	7213	0.0180605	0.112439	913.509
Q76LX8	ADAMTS13	rs28647808	G	0.0937197	-0.891989	1e-200	7213	0.0295082	0.112439	913.509
Q76M96	CCDC80	rs9870933	A	0.372799	0.147132	7.43e-18	7213	0.0170923	0.0101685	74.0783
Q7L0X0	TRIL	rs740250	T	0.127755	0.299451	1.64e-33	7213	0.0248222	0.0197778	145.495
Q7L1S5	CHST9	rs11660451	C	0.321919	0.304102	4.12e-66	7213	0.0177066	0.0392869	294.883
Q7L266	ASRGL1	rs3017096	T	0.454041	0.140228	5.11e-17	7213	0.0167254	0.00965136	70.2742
Q7LFX5	CHST15	rs7078438	C	0.303618	-0.193143	8.31e-27	7213	0.0180191	0.0156787	114.86
Q7LG56	RRM2B	rs11785514	C	0.0685568	0.411628	1.63e-36	7213	0.0326161	0.0216045	159.23
Q7Z3B1	NEGR1	rs11209871	G	0.139817	-0.238782	1.62e-23	7213	0.0238927	0.013658	99.8513
Q7Z4F1	LRP10	rs182793305	A	0.0194094	0.531241	3.09e-19	7213	0.0592542	0.0110209	80.3571
Q7Z4H8	KDELC2	rs141379009	G	0.0294607	-1.38995	2.53e-188	7213	0.0474879	0.106164	856.471
Q7Z4W1	DCXR	rs7207947	T	0.415777	0.140266	4.09e-17	7213	0.0166779	0.00971109	70.7134
Q7Z553	MDGA2	rs145891385	G	0.0584362	0.758481	3.93e-103	7213	0.0351738	0.0605623	464.868
Q7Z5A7	FAM19A5	rs5768649	T	0.112297	-0.169841	1.32e-10	7213	0.026435	0.00569025	41.2672
Q7Z7M8	B3GNT8	rs284663	C	0.388119	-0.827732	1e-200	7213	0.0273825	0.112439	913.509
Q86SJ2	AMIGO2	rs1101751	G	0.300014	0.149186	1.85e-16	7213	0.018124	0.00930622	67.7376
Q86TD4	SRL	rs11640587	C	0.377651	0.187831	3.23e-28	7213	0.0170521	0.0165432	121.3
Q86TH1	ADAMTSL2	rs10120207	C	0.0876196	0.178086	1.89e-09	7213	0.0296465	0.00497772	36.0739
Q86U17	SERPINA11	rs55911632	G	0.159157	-0.346229	1.78e-52	7213	0.0227111	0.0312148	232.343
Q86UD1	OAF	rs2845705	A	0.202828	0.706956	1e-200	7213	0.0233871	0.112439	913.509
Q86UW8	HAPLN4	rs55762233	G	0.15576	0.281069	1.99e-34	7213	0.0229702	0.0203357	149.684
Q86UX2	ITIH5	rs6602258	G	0.252322	-0.427218	1.14e-115	7213	0.0186878	0.06756	522.473
Q86UX7	FERMT3	rs7948329	G	0.430403	-0.142634	2.44e-17	7213	0.0168386	0.00984963	71.7322
Q86V40	TRABD2A	rs7598011	G	0.126022	0.141713	1.22e-08	7213	0.0248754	0.00447933	32.4458
Q86VB7	CD163	rs11054859	A	0.106128	-0.174473	1.09e-10	7213	0.0270337	0.00574155	41.6414
Q86VR8	FJX1	rs10768174	G	0.431721	0.273935	1.36e-61	7213	0.0165421	0.0366261	274.152
Q86VW2	ARHGEF25	rs10437954	G	0.102731	0.310478	2.75e-29	7213	0.0276353	0.0171982	126.187
Q86VZ4	LRP11	rs3805753	T	0.371066	0.912601	1e-200	7213	0.0301901	0.112439	913.509
Q86WA6	BPHL	rs3799225	G	0.049286	0.217967	1.92e-08	7213	0.0387907	0.00435827	31.5651
Q86WD7	SERPINA9	rs11160181	T	0.418342	-0.193143	7.42e-31	7213	0.016723	0.0181575	133.355
Q86XP6	GKN2	rs62133344	A	0.0539304	-0.964384	5.9e-159	7213	0.0358997	0.0909476	721.436
Q86YB8	ERO1LB	rs2463201	T	0.406558	0.328498	9.66e-87	7213	0.0166407	0.0512571	389.584
Q86Z14	KLB	rs13112140	A	0.334119	-0.635276	1e-200	7213	0.0210158	0.112439	913.509
Q8IU57	IFNLR1	rs139958347	C	0.0368085	-0.907799	2.44e-97	7213	0.0433576	0.057294	438.257
Q8IUC8	GALNT13	rs67335822	T	0.157216	0.145814	1.84e-10	7213	0.0228759	0.00560128	40.6183
Q8IUL8	CILP2	rs4808205	G	0.165049	0.184904	1.81e-16	7213	0.022456	0.00931209	67.7807
Q8IV08	PLD3	rs4803321	A	0.0366699	-0.55044	9.83e-36	7213	0.0441125	0.0211303	155.66
Q8IVD9	NUDCD3	rs73105364	T	0.0354222	0.376946	3.15e-17	7213	0.0446573	0.00978113	71.2284
Q8IVM0	CCDC50	rs147604673	T	0.0171912	-0.55557	6.63e-18	7213	0.0644429	0.0101991	74.3032
Q8IW75	SERPINA12	rs4900236	T	0.227783	0.530021	3.13e-166	7213	0.0192882	0.0947648	754.886
Q8IWQ3	BRSK2	rs4255564	C	0.265493	0.121941	1.02e-10	7213	0.0188648	0.00575934	41.7712
Q8IWV2	CNTN4	rs13071423	A	0.181201	0.370997	2.05e-68	7213	0.0212246	0.0406377	305.451
Q8IWY4	SCUBE1	rs5759290	A	0.150561	0.254109	4.92e-28	7213	0.0231488	0.0164313	120.465
Q8IX30	SCUBE3	rs942374	T	0.160613	-0.356218	1.18e-55	7213	0.0226663	0.0331079	246.916
Q8IXB1	DNAJC10	rs288334	T	0.364966	-0.211479	1e-34	7213	0.0172046	0.0205176	151.051
Q8IYB5	SMAP1	rs1917342	G	0.304034	-0.751995	1e-200	7213	0.024877	0.112439	913.509
Q8IYJ0	PIANP	rs11064321	C	0.376958	0.345008	1.02e-93	7213	0.0167999	0.0552397	421.624
Q8IYR6	TMEFF1	rs10989102	C	0.12221	-0.241732	2.11e-21	7213	0.0254469	0.0123561	90.2145
Q8IYS0	GRAMD1C	rs61634901	A	0.331831	0.575464	1e-200	7213	0.0190371	0.112439	913.509
Q8IZF2	ADGRF5	rs586024	G	0.065784	-1.37574	1e-200	7213	0.0455113	0.112439	913.509
Q8IZI9	IFNL3	rs62120535	G	0.189242	0.119778	1.59e-08	7213	0.0211938	0.00440861	31.9313
Q8IZJ1	UNC5B	rs7907590	G	0.141758	0.262621	6.5e-29	7213	0.0235353	0.0169696	124.48
Q8IZP7	HS6ST3	rs12860877	C	0.460627	0.128073	1.37e-14	7213	0.0166347	0.00815103	59.2601
Q8IZS8	CACNA2D3	rs9882539	G	0.401151	0.273787	2.57e-61	7213	0.0165716	0.0364628	272.884
Q8N128	FAM177A1	rs799473	G	0.156454	0.896028	1e-200	7213	0.0296418	0.112439	913.509
Q8N142	ADSSL1	rs10142660	T	0.126022	0.185815	1.73e-13	7213	0.0252186	0.00747043	54.2747
Q8N149	LILRA2	rs2151868	C	0.107584	-0.583312	5.79e-108	7213	0.0264269	0.0632713	487.067
Q8N1Q1	CA13	rs113014331	T	0.0625953	-1.22592	1e-200	7213	0.0405551	0.112439	913.509
Q8N2Q7	NLGN1	rs497383	G	0.270345	0.230434	2.26e-35	7213	0.018566	0.0209105	154.006
Q8N2S1	LTBP4	rs34093919	A	0.0135866	-0.748276	3.31e-26	7213	0.0706576	0.0153105	112.121
Q8N3J6	CADM2	rs9880919	A	0.239983	0.154652	2.75e-15	7213	0.0195719	0.00858199	62.4204
Q8N3T6	TMEM132C	rs9669390	T	0.349577	-0.32637	1.11e-79	7213	0.0172669	0.0471931	357.165
Q8N423	LILRB2	rs383925	T	0.187023	-1.10992	1e-200	7213	0.0367177	0.112439	913.509
Q8N428	GALNT16	rs12100668	G	0.399972	-0.314204	2.65e-78	7213	0.0167725	0.046396	350.839
Q8N474	SFRP1	rs147918758	G	0.392139	-0.209407	2.16e-35	7213	0.0168669	0.0209224	154.096
Q8N4Q0	ZADH2	rs12969004	A	0.420352	-0.165514	9.68e-23	7213	0.0168629	0.0131803	96.3124
Q8N6G6	ADAMTSL1	rs117766170	A	0.0624567	0.355752	1.43e-25	7213	0.0340357	0.0149204	109.22
Q8N6Q3	CD177	rs79338083	T	0.0196174	1.54842	8.09e-152	7213	0.058998	0.0871718	688.624
Q8N729	NPW	rs111276210	A	0.0632885	-0.305531	1.22e-19	7213	0.0336959	0.0112698	82.1932
Q8N8U9	BMPER	rs16879245	G	0.082074	-0.381904	1.72e-37	7213	0.0298449	0.0221974	163.699
Q8N9N8	EIF1AD	rs182527881	T	0.0255095	0.622983	8.61e-32	7213	0.0530956	0.0187288	137.631
Q8NAT1	POMGNT2	rs12639294	G	0.469915	-0.404904	1.99e-134	7213	0.0164096	0.0778397	608.681
Q8NBI6	XXYLT1	rs13072883	G	0.420006	-0.302452	1.25e-72	7213	0.01678	0.0431003	324.795
Q8NBJ4	GOLM1	rs138447426	G	0.0173991	1.159	2e-74	7213	0.0635004	0.0441458	333.038
Q8NBJ5	COLGALT1	rs3746317	T	0.438722	-0.141092	3.43e-17	7213	0.0167351	0.00975829	71.0605
Q8NBL1	POGLUT1	rs17203139	G	0.0609317	1.19901	1e-200	7213	0.0396649	0.112439	913.509
Q8NBP7	PCSK9	rs11591147	T	0.0144877	-1.04454	2.39e-51	7213	0.0692927	0.0305414	227.172
Q8NBS9	TXNDC5	rs111331197	T	0.00928878	1.36486	5.22e-57	7213	0.0857748	0.0339123	253.126
Q8NBZ7	UXS1	rs3888361	C	0.123388	0.358402	2.23e-46	7213	0.0250654	0.0275637	204.396
Q8NCG5	CHST4	rs7200431	A	0.297934	0.203281	1.95e-29	7213	0.0180451	0.0172896	126.869
Q8NCW5	APOA1BP	rs41267389	A	0.0286289	-1.46466	1e-200	7213	0.0484529	0.112439	913.509
Q8NFI3	ENGASE	rs56107536	A	0.133509	0.681166	7.15e-180	7213	0.0238188	0.101837	817.609
Q8NFM7	IL17RD	rs6776722	G	0.302787	0.624575	1e-200	7213	0.0206618	0.112439	913.509
Q8NFP4	MDGA1	rs9349050	T	0.478719	0.995718	1e-200	7213	0.0329397	0.112439	913.509
Q8NFT8	DNER	rs35975053	A	0.33398	-0.246397	7.33e-45	7213	0.0175328	0.0266516	197.447
Q8NFU3	TSTD1	rs10908821	G	0.126369	0.998822	1e-200	7213	0.0330424	0.112439	913.509
Q8NFZ4	NLGN2	rs150452493	T	0.0839457	-0.403137	2.87e-41	7213	0.0299614	0.0244849	180.992
Q8NHL6	LILRB1	rs2098953	C	0.0547622	-1.47916	1e-200	7213	0.0489326	0.112439	913.509
Q8TAT2	FGFBP3	rs11186737	T	0.309649	-0.600419	1e-200	7213	0.0198627	0.112439	913.509
Q8TB22	SPATA20	rs8076632	G	0.369749	-0.676147	1e-200	7213	0.0223679	0.112439	913.509
Q8TB73	NDNF	rs6840113	A	0.404686	-0.102137	1.34e-09	7213	0.0168473	0.00506972	36.744
Q8TCD5	NT5C	rs78625720	A	0.0258561	-1.52849	7.35e-200	7213	0.0506751	0.112003	909.525
Q8TCF1	ZFAND1	rs2912805	G	0.14661	0.72832	1e-200	7213	0.0240938	0.112439	913.509
Q8TCV5	WFDC5	rs6124684	T	0.283516	-0.133065	5.57e-13	7213	0.018454	0.00715664	51.9785
Q8TD46	CD200R1	rs62263730	A	0.30244	0.245101	2.07e-42	7213	0.0179585	0.0251745	186.221
Q8TDL5	BPIFB1	rs11699448	T	0.413282	0.320032	1.64e-81	7213	0.0167359	0.04825	365.569
Q8TDQ0	HAVCR2	rs1432872	C	0.174962	0.975569	1e-200	7213	0.0322731	0.112439	913.509
Q8TDX7	NEK7	rs142662761	G	0.0105365	-0.960715	1.97e-32	7213	0.0810224	0.0191196	140.559
Q8TDY8	IGDCC4	rs76702386	C	0.0938583	-0.452024	3.09e-58	7213	0.0280967	0.0346405	258.756
Q8TEA8	DTD1	rs6081231	A	0.369472	-0.761554	1e-200	7213	0.0251932	0.112439	913.509
Q8TEU8	WFIKKN2	rs11079936	T	0.329683	0.706933	1e-200	7213	0.0233863	0.112439	913.509
Q8TEY5	CREB3L4	rs4845586	G	0.474213	0.288777	2.16e-68	7213	0.0165236	0.0406244	305.347
Q8TF42	UBASH3B	rs3937027	A	0.248371	-0.367631	1.67e-82	7213	0.0191064	0.0488219	370.125
Q8TF66	LRRC15	rs923930	A	0.109732	0.841539	1e-200	7213	0.0278393	0.112439	913.509
Q8WTT0	CLEC4C	rs10845821	T	0.392001	0.593882	1e-200	7213	0.0196464	0.112439	913.509
Q8WU39	PACAP	rs116498185	T	0.0537224	0.20891	1.22e-08	7213	0.0366708	0.00447933	32.4458
Q8WUJ1	CYB5D2	rs183282334	A	0.0151809	-1.30617	1.22e-83	7213	0.0674102	0.0494761	375.342
Q8WUM4	PDCD6IP	rs1141054	C	0.267018	-0.669194	1e-200	7213	0.0221378	0.112439	913.509
Q8WVF2	UCMA	rs1537771	T	0.147581	-0.440307	1.18e-79	7213	0.0232989	0.0471777	357.043
Q8WVN6	SECTM1	rs1132115	T	0.486899	-0.350322	1.25e-100	7213	0.0164505	0.0591532	453.372
Q8WVY7	UBLCP1	rs71593333	A	0.0115763	-0.72001	2.83e-20	7213	0.0780481	0.0116612	85.0809
Q8WW12	PCNP	rs13060373	A	0.499445	-0.346945	2.37e-101	7213	0.0162327	0.0595603	456.69
Q8WW22	DNAJA4	rs11639195	T	0.228546	0.115394	5.68e-09	7213	0.019807	0.00468354	33.9319
Q8WW52	FAM151A	rs2060385	T	0.343616	0.302959	1.83e-69	7213	0.0171971	0.0412519	310.266
Q8WWA0	ITLN1	rs61803286	T	0.0778456	0.181304	5.09e-09	7213	0.0310229	0.00471284	34.1452
Q8WWV3	RTN4IP1	rs17565019	C	0.3554	0.0942912	4.94e-08	7213	0.0172902	0.00410621	29.7319
Q8WWX9	SELM	rs11705054	A	0.0490087	0.285625	1.4e-13	7213	0.0386171	0.00752723	54.6905
Q8WXD2	SCG3	rs2607116	A	0.23527	-0.809605	1e-200	7213	0.0267828	0.112439	913.509
Q8WXI7	MUC16	rs193266507	C	0.0662692	-0.288148	2.95e-18	7213	0.0330697	0.0104162	75.9016
Q8WZ59	TMEM190	rs4806666	T	0.456606	-0.828066	1e-200	7213	0.0273935	0.112439	913.509
Q8WZ82	OVCA2	rs145234879	A	0.0142105	1.40274	1.77e-91	7213	0.069154	0.0539648	411.338
Q92484	SMPDL3A	rs28385609	T	0.144323	-0.482748	1.64e-96	7213	0.0231573	0.0568254	434.456
Q92496	CFHR4	rs10494745	A	0.104811	-0.936087	1e-200	7213	0.030967	0.112439	913.509
Q92563	SPOCK2	rs3312	G	0.464162	0.251867	1.56e-52	7213	0.0165121	0.031249	232.605
Q92583	CCL17	rs4396523	C	0.0849161	0.510802	8.36e-67	7213	0.0295828	0.0396935	298.061
Q92598	HSPH1	rs9538558	A	0.225912	0.199646	1.66e-23	7213	0.0199815	0.0136514	99.803
Q92619	HMHA1	rs2240051	G	0.379662	0.351603	2.43e-94	7213	0.0170632	0.0555937	424.485
Q92626	PXDN	rs10202812	T	0.240399	0.249433	5.2e-38	7213	0.0193526	0.0225126	166.077
Q92692	PVRL2	rs440277	A	0.318245	-0.141434	1.9e-15	7213	0.0177956	0.00868122	63.1485
Q92729	PTPRU	rs2179795	T	0.282407	-0.253223	3.44e-43	7213	0.0183783	0.0256446	189.791
Q92743	HTRA1	rs7074542	T	0.308679	-0.190676	2.74e-26	7213	0.017975	0.0153609	112.495
Q92752	TNR	rs2235256	G	0.418342	-0.218953	3.33e-39	7213	0.0167151	0.0232359	171.54
Q92765	FRZB	rs288326	A	0.116595	0.637811	5.29e-138	7213	0.0255065	0.0797736	625.115
Q92769	HDAC2	rs13212298	C	0.260918	-0.10362	4.55e-08	7213	0.0189501	0.00412813	29.8913
Q92820	GGH	rs4739037	A	0.0676556	0.910339	6.92e-173	7213	0.0324768	0.098229	785.487
Q92832	NELL1	rs8176786	T	0.0481076	1.09483	4.27e-184	7213	0.0378369	0.104005	837.032
Q92854	SEMA4D	rs45464494	T	0.0874116	-1.33561	1e-200	7213	0.0441838	0.112439	913.509
Q92859	NEO1	rs13379875	C	0.411063	-0.352341	4.35e-98	7213	0.0167626	0.0577178	441.697
Q92947	GCDH	rs2238641	C	0.386455	-0.170847	1.08e-23	7213	0.0170267	0.0137663	100.654
Q93070	ART4	rs7311924	G	0.386594	0.968653	1e-200	7213	0.0320444	0.112439	913.509
Q93091	RNASE6	rs1045922	A	0.240191	1.05847	1e-200	7213	0.0350156	0.112439	913.509
Q969E1	LEAP2	rs60545802	G	0.171843	0.41656	4.5e-81	7213	0.021844	0.0479971	363.557
Q969G6	RFK	rs594586	G	0.234576	-0.165003	2.09e-17	7213	0.019438	0.00989116	72.0377
Q969J5	IL22RA2	rs6917836	A	0.105781	-0.223758	1.03e-16	7213	0.0269547	0.00946334	68.8921
Q969M7	UBE2F	rs2326005	A	0.451684	0.118121	1.65e-12	7213	0.016728	0.00686525	49.8476
Q969P0	IGSF8	rs12401728	T	0.217247	0.293985	3.85e-48	7213	0.0201657	0.0286218	212.473
Q969T7	NT5C3L	rs57672173	C	0.238389	0.211134	8.19e-28	7213	0.0193151	0.0162957	119.455
Q969X2	ST6GALNAC6	rs61740973	T	0.0143491	-0.380105	4.34e-08	7213	0.0694075	0.00414073	29.9829
Q969Z4	RELT	rs56801796	G	0.216276	0.154046	9.55e-15	7213	0.0198895	0.00824788	59.9701
Q96AP7	ESAM	rs12541	C	0.227506	-0.392821	1.78e-90	7213	0.0194751	0.0533931	406.734
Q96AT9	RPE	rs2723211	A	0.453487	0.147632	7.51e-19	7213	0.0166495	0.0107829	78.603
Q96AW1	VOPP1	rs117042408	A	0.0305698	-0.489085	1.16e-24	7213	0.0477066	0.0143619	105.073
Q96B86	RGMA	rs10852188	A	0.427631	0.241869	3.18e-47	7213	0.0167573	0.0280717	208.271
Q96BJ3	AIDA	rs28709375	A	0.277277	0.260654	9.26e-45	7213	0.0185691	0.0265905	196.982
Q96BQ1	FAM3D	rs7433100	T	0.0993345	-0.438052	1.04e-57	7213	0.0273563	0.034328	256.339
Q96BS2	TESC	rs2393124	G	0.347983	-0.357116	4.12e-94	7213	0.0173523	0.0554634	423.432
Q96CN7	ISOC1	rs77655181	T	0.299182	0.249239	1.79e-43	7213	0.0180276	0.0258157	191.09
Q96D42	HAVCR1	rs6889164	C	0.281922	-0.466529	2.66e-145	7213	0.0181755	0.0836967	658.665
Q96DB5	RMDN1	rs7818213	C	0.476362	0.948348	1e-200	7213	0.0313726	0.112439	913.509
Q96DU3	SLAMF6	rs1041067	T	0.201858	-0.388563	1.45e-79	7213	0.0205727	0.047126	356.632
Q96DX8	RTP4	rs1878861	G	0.40628	0.506623	1e-200	7213	0.0167598	0.112439	913.509
Q96DZ1	ERLEC1	rs2692523	T	0.175031	-0.247753	7.01e-30	7213	0.021819	0.0175614	128.899
Q96EE4	CCDC126	rs35121828	A	0.256967	0.497549	2.4e-157	7213	0.0186172	0.0900989	714.037
Q96EK5	KIAA1279	rs17471869	G	0.480313	0.0938728	1.29e-08	7213	0.0165054	0.00446443	32.3374
Q96EK6	GNPNAT1	rs2296494	C	0.382504	-0.348992	6.67e-94	7213	0.0169768	0.0553445	422.471
Q96EY8	MMAB	rs7970557	T	0.178913	-0.67284	1e-200	7213	0.0222585	0.112439	913.509
Q96F10	SAT2	rs13894	A	0.06925	-0.317648	1.94e-22	7213	0.0325964	0.0129944	94.9364
Q96F46	IL17RA	rs4819959	G	0.497297	-0.799341	1e-200	7213	0.0264433	0.112439	913.509
Q96F85	CNRIP1	rs7604489	T	0.153681	-0.815743	1e-200	7213	0.0269859	0.112439	913.509
Q96FE5	LINGO1	rs62007781	A	0.414044	0.134419	1.14e-15	7213	0.0167798	0.0088183	64.1545
Q96FJ2	DYNLL2	rs9902118	C	0.325731	-0.3846	2.05e-107	7213	0.0174696	0.0629642	484.544
Q96FN9	DTD2	rs17097898	T	0.127825	-0.460686	1.11e-77	7213	0.0246925	0.0460357	347.983
Q96FQ6	S100A16	rs9729773	A	0.482116	-0.319067	2.21e-85	7213	0.016294	0.0504772	383.341
Q96GP6	SCARF2	rs5763025	A	0.195758	-0.362552	4.91e-68	7213	0.0208008	0.0404154	303.71
Q96GW7	BCAN	rs2365715	G	0.37779	-0.31023	1.22e-76	7213	0.0167435	0.0454322	343.204
Q96H15	TIMD4	rs1501908	G	0.364827	0.2057	7.03e-33	7213	0.0172229	0.0193925	142.605
Q96HD1	CRELD1	rs6762702	A	0.243172	-0.964466	1e-200	7213	0.0319058	0.112439	913.509
Q96I25	RBM17	rs11256726	C	0.0375711	-0.745598	4.65e-66	7213	0.0434308	0.039256	294.641
Q96IY4	CPB2	rs7988836	G	0.328365	0.766245	1e-200	7213	0.0253484	0.112439	913.509
Q96J42	TXNDC15	rs3733897	G	0.132746	0.472112	4.34e-86	7213	0.0240083	0.0508829	386.587
Q96JA1	LRIG1	rs2306272	C	0.281922	-0.753717	1e-200	7213	0.024934	0.112439	913.509
Q96KN2	CNDP1	rs17817077	A	0.395674	0.244799	1.53e-47	7213	0.0169014	0.0282624	209.727
Q96LA6	FCRL1	rs4971154	C	0.481908	0.407539	1.16e-138	7213	0.0162584	0.0801292	628.145
Q96LB9	PGLYRP3	rs55991125	T	0.0534452	-0.38828	4.27e-26	7213	0.036747	0.0152426	111.616
Q96LL9	DNAJC30	rs9647712	A	0.0351449	1.04623	1.45e-121	7213	0.0446228	0.0708151	549.565
Q96MK3	FAM20A	rs12453086	T	0.230209	-0.283788	1.25e-46	7213	0.0197915	0.0277147	205.547
Q96MU8	KREMEN1	rs2205771	A	0.151116	0.427977	3.37e-76	7213	0.023167	0.0451762	341.178
Q96NZ8	WFIKKN1	rs55798945	G	0.275406	0.170856	4.33e-20	7213	0.0186127	0.0115473	84.2403
Q96P31	FCRL3	rs3761959	T	0.436365	0.711587	1e-200	7213	0.0235403	0.112439	913.509
Q96PD5	PGLYRP2	rs10164310	A	0.149314	-0.423254	1.12e-74	7213	0.0231495	0.0442923	334.194
Q96PJ5	FCRL4	rs11582663	T	0.159088	-1.00443	1e-200	7213	0.0332279	0.112439	913.509
Q96PQ1	SIGLEC12	rs3826667	C	0.151671	1.09955	1e-200	7213	0.0363746	0.112439	913.509
Q96PX8	SLITRK1	rs2876803	A	0.168723	0.158333	1.19e-12	7213	0.0222799	0.00695294	50.4887
Q96Q83	ALKBH3	rs2292889	G	0.266394	-0.216182	6.66e-31	7213	0.0187027	0.0181862	133.57
Q96QR1	SCGB3A1	rs307802	C	0.404201	0.117237	6.16e-12	7213	0.0170504	0.00651187	47.2649
Q96QV1	HHIP	rs11727676	C	0.0907389	0.299585	3.3e-25	7213	0.028882	0.0146973	107.563
Q96R05	RBP7	rs35232720	T	0.054485	-1.01757	7.42e-180	7213	0.0355837	0.101829	817.535
Q96SL4	GPX7	rs6669154	A	0.167961	0.719894	1e-200	7213	0.0238151	0.112439	913.509
Q96SM3	CPXM1	rs11697820	C	0.418966	-0.709504	1e-200	7213	0.0234714	0.112439	913.509
Q96T60	PNKP	rs2290773	G	0.0093581	-0.590237	1.01e-11	7213	0.0867349	0.00637925	46.2961
Q99075	HBEGF	rs1991801	G	0.293221	0.109534	1.24e-09	7213	0.0180303	0.00509047	36.8952
Q99426	TBCB	rs2231569	T	0.0415223	0.822433	5.12e-89	7213	0.0411142	0.0525598	400.035
Q99497	PARK7	rs17523802	A	0.168723	0.79023	1e-200	7213	0.0261419	0.112439	913.509
Q99536	VAT1	rs4239148	A	0.338209	-0.0959998	4.81e-08	7213	0.0175882	0.00411332	29.7836
Q99538	LGMN	rs148659834	A	0.0135866	-0.853805	1.08e-33	7213	0.0705731	0.0198883	146.325
Q99542	MMP19	rs56180965	C	0.0482462	-0.317774	2.37e-16	7213	0.0387449	0.00923977	67.2493
Q99650	OSMR	rs357277	G	0.392416	-0.204229	4.68e-33	7213	0.0170515	0.0195003	143.413
Q99706	KIR2DL4	rs685323	C	0.387772	-0.689406	1e-200	7213	0.0228065	0.112439	913.509
Q99727	TIMP4	rs184262	A	0.167753	-0.560213	1.21e-145	7213	0.0217993	0.0838798	660.238
Q99729	HNRNPAB	rs72648830	T	0.122834	0.170735	1.33e-11	7213	0.0252367	0.00630545	45.7571
Q99733	NAP1L4	rs4758622	A	0.221475	-0.839201	1e-200	7213	0.0277619	0.112439	913.509
Q99784	OLFM1	rs10858334	G	0.141203	0.198987	5.8e-17	7213	0.023776	0.00961739	70.0245
Q99816	TSG101	rs1395319	G	0.338278	0.527376	1e-200	7213	0.0174463	0.112439	913.509
Q99829	CPNE1	rs113522583	A	0.102731	-1.32815	1e-200	7213	0.043937	0.112439	913.509
Q99935	PROL1	rs77611689	A	0.0660613	0.211482	2.34e-10	7213	0.0333716	0.00553689	40.1488
Q99941	ATF6B	rs6449	T	0.288576	0.27216	5.67e-51	7213	0.0181233	0.0303171	225.452
Q99959	PKP2	rs11052286	T	0.290725	0.114803	3.16e-10	7213	0.0182496	0.00545643	39.5622
Q99969	RARRES2	rs3735167	T	0.262928	0.50049	1.02e-158	7213	0.0186451	0.0908223	720.343
Q99972	MYOC	rs235879	T	0.411757	-0.434479	2e-153	7213	0.0164665	0.0880246	696.012
Q99983	OMD	rs10992426	A	0.222584	-0.155488	3.48e-15	7213	0.0197511	0.00851881	61.9569
Q99985	SEMA3C	rs917191	G	0.421461	-0.17953	7.53e-27	7213	0.0167349	0.015705	115.056
Q99988	GDF15	rs1058587	G	0.262166	0.672832	1e-200	7213	0.0222582	0.112439	913.509
Q9BPX1	HSD17B14	rs12978094	C	0.0394427	-0.273356	1.35e-10	7213	0.0425693	0.00568423	41.2233
Q9BQ16	SPOCK3	rs35065151	A	0.439969	-0.670458	1e-200	7213	0.0221797	0.112439	913.509
Q9BQ51	PDCD1LG2	rs16923189	G	0.297102	0.676326	1e-200	7213	0.0223738	0.112439	913.509
Q9BQG2	NUDT12	rs11242495	G	0.15576	-0.32002	1.28e-44	7213	0.0228357	0.0265058	196.338
Q9BQI0	AIF1L	rs11244284	C	0.286566	-0.544168	1e-200	7213	0.0180018	0.112439	913.509
Q9BQR3	PRSS27	rs71386687	T	0.077083	0.192378	7.8e-10	7213	0.0312863	0.00521452	37.799
Q9BR61	ACBD6	rs75468761	G	0.0432552	-0.331618	2.45e-16	7213	0.0404525	0.00923086	67.1839
Q9BRK3	MXRA8	rs2765021	C	0.0637737	-0.252527	6.31e-14	7213	0.0336636	0.00774111	56.2566
Q9BRX8	FAM213A	rs10788623	A	0.44808	-0.093119	2.96e-08	7213	0.016797	0.00424278	30.725
Q9BSQ5	CCM2	rs7810512	C	0.265424	0.107052	1.27e-08	7213	0.0188139	0.0044686	32.3677
Q9BT09	CNPY3	rs9471969	T	0.250173	-0.185098	3.48e-22	7213	0.0191111	0.0128382	93.7801
Q9BUD6	SPON2	rs2279279	C	0.334258	0.584408	1e-200	7213	0.019333	0.112439	913.509
Q9BUP0	EFHD1	rs200118999	G	0.0183003	0.386942	4.7e-10	7213	0.0621214	0.00535013	38.7873
Q9BUP3	HTATIP2	rs10437608	G	0.459448	-0.297298	4.78e-73	7213	0.0164456	0.0433435	326.711
Q9BUT1	BDH2	rs78336913	T	0.174823	0.356888	5.97e-62	7213	0.0214873	0.0368371	275.792
Q9BW91	NUDT9	rs28805573	A	0.137391	-0.459196	8.06e-83	7213	0.0238184	0.0490041	371.577
Q9BWD1	ACAT2	rs25683	A	0.418688	0.344014	6.13e-94	7213	0.0167313	0.0553654	422.639
Q9BWP8	COLEC11	rs6542680	C	0.190905	0.657269	1e-200	7213	0.0217433	0.112439	913.509
Q9BWV1	BOC	rs3856718	A	0.17108	0.355246	9.05e-60	7213	0.0217872	0.0355485	265.789
Q9BX59	TAPBPL	rs2244083	T	0.299113	1.07554	1e-200	7213	0.0355803	0.112439	913.509
Q9BX67	JAM3	rs655627	G	0.446832	-0.215657	5.24e-38	7213	0.0167328	0.0225105	166.062
Q9BX93	PLA2G12B	rs12257692	C	0.0457507	-0.323922	2.68e-16	7213	0.0395658	0.00920679	67.007
Q9BXB1	LGR4	rs2448001	A	0.361916	0.170415	5.85e-23	7213	0.0172731	0.0133149	97.3092
Q9BXD5	NPL	rs116699595	G	0.0359074	0.3465	4.18e-15	7213	0.0441434	0.00846962	61.5961
Q9BXJ0	C1QTNF5	rs9640	A	0.12318	0.273382	1.75e-27	7213	0.0251688	0.0160936	117.949
Q9BXJ4	C1QTNF3	rs840390	A	0.129419	-0.213205	9.69e-18	7213	0.0248561	0.0100973	73.5543
Q9BXN1	ASPN	rs2516568	T	0.326425	-0.510872	6.13e-196	7213	0.0171078	0.110027	891.493
Q9BXR6	CFHR5	rs35662416	A	0.0239152	-1.20255	2.53e-114	7213	0.0529172	0.0668135	516.287
Q9BXS1	IDI2	rs1044261	T	0.0770137	-0.556295	6.63e-72	7213	0.0310224	0.0426778	321.469
Q9BXY4	RSPO3	rs1892172	G	0.462498	-0.492365	1e-200	7213	0.0162881	0.112439	913.509
Q9BY32	ITPA	rs67002563	A	0.072508	-1.36641	1e-200	7213	0.0452027	0.112439	913.509
Q9BY67	CADM1	rs17564430	G	0.253015	0.292195	5.31e-54	7213	0.0188846	0.0321241	239.336
Q9BY76	ANGPTL4	rs116843064	A	0.0209344	-0.59482	3.53e-25	7213	0.0573803	0.0146794	107.43
Q9BYB0	SHANK3	rs6009946	T	0.258214	0.401098	2.68e-104	7213	0.0184943	0.0612176	470.226
Q9BYC5	FUT8	rs8020305	C	0.0607237	0.728754	2.02e-100	7213	0.0342572	0.0590356	452.414
Q9BYH1	SEZ6L	rs590671	C	0.410509	0.188905	3.37e-29	7213	0.0168412	0.0171442	125.783
Q9BYZ8	REG4	rs2298069	T	0.140094	-0.259668	1.24e-27	7213	0.0238373	0.0161853	118.632
Q9BZM4	ULBP3	rs72501730	A	0.119645	-0.255101	1.36e-23	7213	0.0254814	0.0137047	100.198
Q9BZR6	RTN4R	rs75765	C	0.253015	0.401726	1.8e-101	7213	0.0187844	0.0596276	457.238
Q9BZW8	CD244	rs114594620	C	0.0174685	-0.356236	2.66e-08	7213	0.0640429	0.00427129	30.9324
Q9C005	DPY30	rs140841871	T	0.0451269	0.453859	1.31e-29	7213	0.040164	0.0173953	127.658
Q9GZM7	TINAGL1	rs9425884	C	0.463746	-0.0943742	1.22e-08	7213	0.0165659	0.00447933	32.4458
Q9GZN4	PRSS22	rs7204669	A	0.319354	0.30323	4.42e-67	7213	0.0175241	0.0398559	299.331
Q9GZP0	PDGFD	rs10895596	A	0.300846	-0.52836	2.74e-196	7213	0.0176774	0.110204	893.101
Q9GZQ8	MAP1LC3B	rs9972730	G	0.43484	-0.124283	9.68e-14	7213	0.016693	0.00762626	55.4156
Q9GZX9	TWSG1	rs62087477	T	0.077499	0.423284	7.65e-43	7213	0.0308504	0.0254353	188.201
Q9H0B8	CRISPLD2	rs535285054	C	0.0110218	-0.611036	2.24e-14	7213	0.08002	0.00801907	58.293
Q9H0E2	TOLLIP	rs2056083	A	0.149452	-0.151326	9.18e-11	7213	0.0233532	0.00578757	41.9771
Q9H0P0	NT5C3A	rs12155117	A	0.299459	0.185298	3.97e-25	7213	0.0178945	0.014648	107.197
Q9H0R4	HDHD2	rs78720782	T	0.0566339	1.31254	1e-200	7213	0.0434206	0.112439	913.509
Q9H0V9	LMAN2L	rs58361269	A	0.335228	0.248066	2.41e-45	7213	0.0175534	0.0269422	199.66
Q9H299	SH3BGRL3	rs4659423	C	0.0703591	-1.17867	1e-200	7213	0.038992	0.112439	913.509
Q9H2A7	CXCL16	rs7214635	G	0.249411	-0.214211	5.39e-29	7213	0.0191683	0.0170194	124.852
Q9H2E6	SEMA6A	rs3733724	T	0.0849854	0.385829	1.94e-38	7213	0.02976	0.0227722	168.037
Q9H2K0	MTIF3	rs1218825	G	0.0468598	-0.312736	2.11e-15	7213	0.0394137	0.00865309	62.9421
Q9H2R5	KLK15	rs73048483	A	0.0650908	0.389093	7.37e-31	7213	0.0336873	0.0181593	133.369
Q9H3H3	C11orf68	rs554169857	A	0.0186469	0.924467	5.47e-52	7213	0.0609349	0.0309238	230.107
Q9H3S1	SEMA4A	rs12401997	A	0.392209	0.268619	5.85e-57	7213	0.016889	0.033883	252.899
Q9H3T3	SEMA6B	rs4353572	T	0.491751	-0.138043	4.57e-17	7213	0.016439	0.00968132	70.4945
Q9H3U1	UNC45A	rs8041035	T	0.0286289	-0.384635	1.79e-14	7213	0.0501815	0.00807926	58.7341
Q9H3U7	SMOC2	rs56296467	C	0.268751	-0.471633	9.25e-147	7213	0.0182815	0.0844769	665.371
Q9H488	POFUT1	rs76143353	T	0.0619021	-1.03236	1e-200	7213	0.0341519	0.112439	913.509
Q9H4A4	RNPEP	rs6702334	A	0.31471	0.536648	1e-200	7213	0.017753	0.112439	913.509
Q9H4A9	DPEP2	rs76359116	C	0.041245	-0.603741	1.89e-47	7213	0.0417252	0.0282073	209.307
Q9H4D0	CLSTN2	rs9863263	A	0.0610703	0.592833	6.07e-65	7213	0.0348362	0.0386003	289.522
Q9H4E7	DEF6	rs45482297	A	0.0336892	-0.547559	9.08e-33	7213	0.0459281	0.0193248	142.097
Q9H4F8	SMOC1	rs1958078	A	0.157077	-0.516105	6.29e-118	7213	0.022355	0.0688095	532.851
Q9H4G4	GLIPR2	rs10814339	C	0.269444	-0.353374	4.68e-81	7213	0.0185325	0.0479872	363.478
Q9H5V8	CDCP1	rs2276862	G	0.178705	-0.37749	1.2e-69	7213	0.0213988	0.0413591	311.107
Q9H5Y7	SLITRK6	rs9547187	A	0.221475	-0.346282	4.2e-70	7213	0.0195641	0.0416257	313.2
Q9H665	IGFLR1	rs12459634	C	0.151393	-1.00202	1e-200	7213	0.0331482	0.112439	913.509
Q9H6B4	CLMP	rs2302605	C	0.442812	-0.436321	4.35e-159	7213	0.0162354	0.0910174	722.045
Q9H6E4	CCDC134	rs11090057	A	0.357688	0.361625	1.45e-99	7213	0.0170736	0.0585525	448.482
Q9H772	GREM2	rs116135446	T	0.0411063	0.229128	4.07e-08	7213	0.0417523	0.00415785	30.1075
Q9H7M9	C10orf54	rs12415873	T	0.143283	0.610659	2.99e-151	7213	0.0233116	0.0868701	686.014
Q9H8J5	MANSC1	rs3741798	T	0.11812	0.634892	1.68e-140	7213	0.0251598	0.0811202	636.599
Q9HAB8	PPCS	rs4660635	A	0.367877	-0.45315	5.55e-163	7213	0.0166564	0.0930642	739.949
Q9HAP6	LIN7B	rs4802563	A	0.40933	0.162023	4.68e-22	7213	0.0167812	0.012759	93.1939
Q9HB21	PLEKHA1	rs10788274	G	0.472896	0.22619	3.35e-43	7213	0.016414	0.0256516	189.843
Q9HB29	IL1RL2	rs1960510	T	0.399626	0.332749	1.32e-89	7213	0.0165785	0.0528962	402.738
Q9HB63	NTN4	rs17288108	G	0.176002	-0.372722	6.4e-67	7213	0.0215667	0.0397616	298.593
Q9HB71	CACYBP	rs16847450	G	0.116664	-0.703685	5.98e-170	7213	0.0253229	0.0967038	771.985
Q9HBB8	CDHR5	rs12421646	G	0.226813	0.210369	1.53e-26	7213	0.0197304	0.0155161	113.65
Q9HBG7	LY9	rs12128261	G	0.21593	0.607541	1e-200	7213	0.0200983	0.112439	913.509
Q9HBK9	AS3MT	rs79254677	G	0.111812	-0.169067	1.86e-10	7213	0.0265308	0.00559838	40.5972
Q9HBL8	NMRAL1	rs11557236	A	0.0849854	-0.510755	4.55e-67	7213	0.0295201	0.0398485	299.273
Q9HC16	APOBEC3G	rs3891126	G	0.10086	-0.332835	7.65e-34	7213	0.027447	0.0199796	147.01
Q9HC23	PROK2	rs7644362	G	0.167545	0.785577	1e-200	7213	0.025988	0.112439	913.509
Q9HC56	PCDH9	rs4884685	C	0.376126	-0.126729	2.22e-13	7213	0.0172777	0.0074035	53.7848
Q9HC57	WFDC1	rs400345	T	0.182795	-0.845478	1e-200	7213	0.0279696	0.112439	913.509
Q9HCB6	SPON1	rs10832164	C	0.493623	0.498155	1e-200	7213	0.0164796	0.112439	913.509
Q9HCJ2	LRRC4C	rs10837377	C	0.434632	0.27077	2.37e-59	7213	0.0166665	0.0353011	263.871
Q9HCM2	PLXNA4	rs62622406	T	0.0165673	-0.662224	2.15e-24	7213	0.0649741	0.0141972	103.851
Q9HCN6	GP6	rs1613662	G	0.162692	-1.06124	1e-200	7213	0.0351073	0.112439	913.509
Q9HCU0	CD248	rs565972	A	0.476778	0.0955749	1.12e-08	7213	0.0167338	0.00450216	32.6119
Q9HCY8	S100A14	rs9330298	A	0.475184	-0.171167	6.73e-25	7213	0.016611	0.0145072	106.152
Q9HD15	SRA1	rs801460	T	0.461043	0.461083	4.02e-180	7213	0.0161117	0.101966	818.759
Q9HD89	RETN	rs34124816	C	0.0286289	-0.748559	3.92e-51	7213	0.0497659	0.030413	226.187
Q9HDC9	APMAP	rs227598	T	0.128726	0.220866	5.5e-19	7213	0.0248117	0.0108664	79.2182
Q9NNX6	CD209	rs2335525	G	0.250659	-0.399727	6.09e-100	7213	0.0188362	0.0587652	450.213
Q9NP79	VTA1	rs225628	C	0.474283	-0.266426	1.19e-57	7213	0.016647	0.0342933	256.071
Q9NP81	SARS2	rs1808661	G	0.382989	0.113394	3.14e-11	7213	0.0170778	0.00607511	44.0754
Q9NP99	TREM1	rs2234243	T	0.0849161	-0.890395	1e-200	7213	0.0294555	0.112439	913.509
Q9NPB1	NT5M	rs16961516	A	0.0424234	0.264647	1.12e-10	7213	0.0410318	0.00573428	41.5883
Q9NPC4	A4GALT	rs8138197	A	0.4817	-0.372678	1.02e-113	7213	0.0164438	0.0664774	513.505
Q9NPF2	CHST11	rs1704878	A	0.295716	-0.574916	1e-200	7213	0.019019	0.112439	913.509
Q9NPH0	ACP6	rs2153463	T	0.291488	-0.924934	1e-200	7213	0.0305981	0.112439	913.509
Q9NPH3	IL1RAP	rs7611887	C	0.154443	1.27612	1e-200	7213	0.0422158	0.112439	913.509
Q9NPH6	OBP2B	rs4454354	T	0.21288	-0.35204	1.98e-68	7213	0.0201378	0.0406465	305.52
Q9NPJ3	ACOT13	rs4544900	T	0.254194	0.276588	2.37e-47	7213	0.0191359	0.0281483	208.856
Q9NQ25	SLAMF7	rs11581248	T	0.136975	-1.21722	1e-200	7213	0.0402673	0.112439	913.509
Q9NQ30	ESM1	rs4242051	T	0.248926	-0.181186	3.83e-21	7213	0.0191992	0.0121966	89.0354
Q9NQ38	SPINK5	rs17599675	C	0.259531	0.181518	2.36e-22	7213	0.0186652	0.012942	94.5486
Q9NQ79	CRTAC1	rs684225	A	0.414807	-0.36741	1.9e-110	7213	0.0164538	0.064658	498.479
Q9NQW7	XPNPEP1	rs3862006	A	0.147927	0.386843	8.69e-63	7213	0.0231303	0.0373308	279.631
Q9NQX5	NPDC1	rs71483301	C	0.295716	-0.110541	1.24e-09	7213	0.0181961	0.00509047	36.8952
Q9NR31	SAR1A	rs4746970	C	0.419867	0.396475	1.62e-129	7213	0.0163744	0.0751703	586.111
Q9NR34	MAN1C1	rs11247595	T	0.491543	0.292094	8.98e-72	7213	0.0163043	0.0426009	320.864
Q9NR45	NANS	rs7855984	A	0.244143	0.201298	1.13e-25	7213	0.0192177	0.0149832	109.687
Q9NR46	SH3GLB2	rs11537529	T	0.455636	-0.576641	1e-200	7213	0.0190761	0.112439	913.509
Q9NR61	DLL4	rs117454282	T	0.0200333	0.375018	9.29e-11	7213	0.0578903	0.00578438	41.9538
Q9NR71	ASAH2	rs2842126	A	0.207057	-0.639068	1e-200	7213	0.0211412	0.112439	913.509
Q9NRB3	CHST12	rs884566	A	0.207265	0.356557	4.63e-69	7213	0.0203002	0.041016	308.416
Q9NRJ3	CCL28	rs7710570	T	0.397061	0.108661	1.14e-10	7213	0.0168542	0.00572953	41.5538
Q9NRN5	OLFML3	rs3811018	A	0.301816	-0.173273	1.21e-21	7213	0.0181301	0.0125049	91.3145
Q9NRV9	HEBP1	rs1941	G	0.0337585	-1.61272	1e-200	7213	0.053351	0.112439	913.509
Q9NRW1	RAB6B	rs9813363	A	0.15583	-0.68858	1e-200	7213	0.0227792	0.112439	913.509
Q9NRX4	PHPT1	rs872463	A	0.262096	0.558795	1e-200	7213	0.0184857	0.112439	913.509
Q9NS18	GLRX2	rs143131184	T	0.0171219	1.04886	4.15e-60	7213	0.0641392	0.0357488	267.342
Q9NS62	THSD1	rs41292808	T	0.0246083	1.52287	5.92e-188	7213	0.0520807	0.105975	854.773
Q9NS68	TNFRSF19	rs3814787	C	0.299529	0.191643	1.35e-26	7213	0.0179545	0.0155495	113.898
Q9NS85	CA10	rs117399000	A	0.0294607	-0.734537	5.1e-52	7213	0.0484012	0.030942	230.247
Q9NS86	LANCL2	rs7786168	C	0.349092	-0.118414	8.8e-12	7213	0.0173503	0.00641621	46.566
Q9NS98	SEMA3G	rs2016575	T	0.166921	0.362468	8.97e-60	7213	0.0222293	0.0355508	265.807
Q9NSY2	STARD5	rs28555408	T	0.0641897	-0.530498	5.72e-57	7213	0.0333512	0.0338888	252.944
Q9NT22	EMILIN3	rs61739314	C	0.0323721	-1.02302	1.21e-108	7213	0.0461999	0.0636513	490.19
Q9NTK5	OLA1	rs10930634	T	0.197768	0.697832	1e-200	7213	0.0230852	0.112439	913.509
Q9NTU7	CBLN4	rs4811612	T	0.355608	0.236976	2.18e-42	7213	0.017368	0.0251609	186.118
Q9NUI1	DECR2	rs1204505	T	0.478164	0.276776	1.78e-64	7213	0.0163245	0.0383254	287.378
Q9NUJ1	ABHD10	rs57797651	G	0.20061	-0.125478	1.51e-09	7213	0.0207632	0.00503777	36.5113
Q9NUM4	TMEM106B	rs5011432	C	0.409746	-0.25715	1.33e-53	7213	0.0166835	0.0318866	237.507
Q9NUU7	DDX19A	rs138325325	A	0.0135173	-1.07038	6.05e-50	7213	0.0720341	0.0297022	220.739
Q9NVM6	DNAJC17	rs57825040	G	0.365659	-0.115275	3.04e-11	7213	0.0173486	0.00608379	44.1387
Q9NVQ4	FAIM	rs641320	A	0.0695966	-0.727406	1.14e-113	7213	0.0321024	0.0664506	513.283
Q9NWX6	THG1L	rs2270812	T	0.343893	-0.842484	1e-200	7213	0.0278705	0.112439	913.509
Q9NX01	TXNL4B	rs116891509	T	0.0734091	0.557124	4.09e-70	7213	0.0314734	0.0416324	313.253
Q9NX62	IMPAD1	rs112433249	C	0.0153889	-1.87713	5.24e-178	7213	0.0659859	0.100877	809.033
Q9NXS2	QPCTL	rs17850756	A	0.322057	-0.47655	1.09e-164	7213	0.0174243	0.0939585	747.796
Q9NXW2	DNAJB12	rs9415063	C	0.357202	0.199928	4.32e-31	7213	0.0172412	0.018301	134.429
Q9NY97	B3GNT2	rs34361686	A	0.479897	0.234086	8.62e-45	7213	0.0166704	0.0266092	197.124
Q9NYA1	SPHK1	rs12941069	T	0.344586	-0.152241	1.49e-18	7213	0.017319	0.0105993	77.2501
Q9NZ08	ERAP1	rs30186	G	0.205393	1.04161	1e-200	7213	0.0344579	0.112439	913.509
Q9NZ52	GGA3	rs7222782	T	0.0860252	-0.209533	1.15e-12	7213	0.029465	0.00696212	50.5558
Q9NZA1	CLIC5	rs35822882	T	0.0234299	-1.27056	1.01e-121	7213	0.0541552	0.0709015	550.287
Q9NZC2	TREM2	rs143332484	T	0.0104672	-1.5304	2.95e-80	7213	0.0806696	0.0475256	359.807
Q9NZK5	CECR1	rs2231495	C	0.337377	-0.837861	1e-200	7213	0.0277176	0.112439	913.509
Q9NZP8	C1RL	rs11613834	A	0.351033	0.361685	2.88e-98	7213	0.0171911	0.0578191	442.52
Q9NZQ7	CD274	rs822342	T	0.258284	-0.36538	3.28e-83	7213	0.0189067	0.0492289	373.37
Q9NZU0	FLRT3	rs11908351	T	0.237627	0.890955	1e-200	7213	0.029474	0.112439	913.509
Q9P0G3	KLK14	rs11666870	A	0.477956	-0.244253	7.77e-51	7213	0.0162876	0.0302354	224.825
Q9P0K1	ADAM22	rs2279542	C	0.487176	0.446487	1.2e-167	7213	0.0161787	0.0955043	761.398
Q9P121	NTM	rs2511781	T	0.426244	0.574718	1e-200	7213	0.0190125	0.112439	913.509
Q9P126	CLEC1B	rs521040	C	0.259809	0.426407	2.29e-115	7213	0.0186772	0.0673921	521.081
Q9P1W8	SIRPG	rs6043409	A	0.339387	-0.492955	2.53e-183	7213	0.0170726	0.103609	833.479
Q9P2B2	PTGFRN	rs4233450	G	0.175863	-1.0095	1e-200	7213	0.0333956	0.112439	913.509
Q9P2E7	PCDH10	rs4864200	T	0.371343	0.235852	1.87e-44	7213	0.0168622	0.0264067	195.583
Q9P2T1	GMPR2	rs34354104	A	0.0439484	-0.967493	6.14e-132	7213	0.0395834	0.0764884	597.24
Q9UBD3	XCL2	rs4656601	A	0.198045	0.221446	7.54e-27	7213	0.0206423	0.0157046	115.053
Q9UBG0	MRC2	rs146385050	A	0.196382	-0.414284	3.39e-88	7213	0.0208087	0.0520903	396.264
Q9UBM8	MGAT4C	rs61929388	T	0.109178	0.237014	1.01e-18	7213	0.0268298	0.0107035	78.0179
Q9UBN6	TNFRSF10D	rs4460371	T	0.489325	0.10224	6.84e-10	7213	0.0165712	0.00524968	38.0552
Q9UBP4	DKK3	rs11022114	A	0.310481	0.47715	4.91e-164	7213	0.0174815	0.0936162	744.791
Q9UBQ7	GRHPR	rs4878690	T	0.312838	0.367175	5.11e-97	7213	0.0175663	0.0571123	436.782
Q9UBR2	CTSZ	rs75940688	A	0.0119229	-0.925535	3.12e-34	7213	0.0758654	0.0202168	148.791
Q9UBS4	DNAJB11	rs56227532	C	0.0766671	-0.570804	2.49e-76	7213	0.0308711	0.0452524	341.782
Q9UBU2	DKK2	rs6815075	A	0.11715	-0.145507	1.83e-08	7213	0.0258571	0.00437109	31.6583
Q9UBV7	B4GALT7	rs59621415	G	0.0417995	0.473376	4.16e-30	7213	0.0415226	0.0176999	129.934
Q9UBX1	CTSF	rs1044522	A	0.237349	0.298029	2.72e-53	7213	0.0193939	0.0317014	236.083
Q9UBX5	FBLN5	rs2267994	G	0.35644	0.14798	1.15e-17	7213	0.0172917	0.0100514	73.2163
Q9UBX7	KLK11	rs62115743	T	0.0824206	-1.05334	1e-200	7213	0.0348459	0.112439	913.509
Q9UBX8	B4GALT6	rs113222817	G	0.0383336	-1.51803	1e-200	7213	0.0502185	0.112439	913.509
Q9UDY4	DNAJB4	rs7514180	A	0.206779	-0.34905	1.92e-67	7213	0.0201164	0.0400683	300.993
Q9UEF7	KL	rs9527032	C	0.151601	0.213542	8.97e-21	7213	0.0228447	0.0119688	87.3525
Q9UEU0	VTI1B	rs10483801	A	0.185221	0.167751	2.46e-15	7213	0.0211924	0.0086119	62.6399
Q9UGC7	MTRF1L	rs3757067	A	0.177804	-0.123684	1.16e-08	7213	0.021678	0.00449279	32.5437
Q9UGM5	FETUB	rs114780909	A	0.0112297	-1.91827	3.26e-134	7213	0.0778048	0.0777234	607.696
Q9UGN4	CD300A	rs2272111	A	0.19652	-0.872801	1e-200	7213	0.0288734	0.112439	913.509
Q9UH65	SWAP70	rs415895	C	0.344517	0.627812	1e-200	7213	0.0207689	0.112439	913.509
Q9UHC6	CNTNAP2	rs10261105	A	0.276515	0.754089	1e-200	7213	0.0249463	0.112439	913.509
Q9UHF4	IL20RA	rs1775296	T	0.282545	0.126066	8.92e-12	7213	0.0184768	0.00641257	46.5395
Q9UHF5	IL17B	rs6862301	A	0.293221	0.189295	2.04e-25	7213	0.018169	0.0148256	108.516
Q9UHG3	PCYOX1	rs2706762	T	0.146194	-0.952514	1e-200	7213	0.0315105	0.112439	913.509
Q9UHL4	DPP7	rs4880198	T	0.221822	-0.523638	1.46e-157	7213	0.0195798	0.0902128	715.03
Q9UHN6	TMEM2	rs1410988	G	0.288853	-0.239721	1.36e-39	7213	0.0182063	0.0234714	173.32
Q9UHX3	ADGRE2	rs67023356	G	0.232081	0.490378	6.28e-143	7213	0.0192648	0.0824248	647.756
Q9UI08	EVL	rs34612764	A	0.346319	0.161853	1.54e-20	7213	0.0174219	0.0118241	86.2839
Q9UI42	CPA4	rs34587586	T	0.405379	-0.989715	1e-200	7213	0.0327411	0.112439	913.509
Q9UIK4	DAPK2	rs55986634	A	0.427839	0.160119	1.28e-21	7213	0.016764	0.0124898	91.2033
Q9UIV8	SERPINB13	rs77157727	A	0.0305005	-0.498763	5.48e-25	7213	0.0483103	0.014562	106.559
Q9UIW2	PLXNA1	rs9822602	G	0.314016	-0.431118	8.1e-135	7213	0.0174462	0.0780512	610.476
Q9UJ70	NAGK	rs11680831	C	0.349231	-0.513707	1e-200	7213	0.0169941	0.112439	913.509
Q9UJA9	ENPP5	rs1047153	C	0.351795	0.799816	1e-200	7213	0.026459	0.112439	913.509
Q9UJC5	SH3BGRL2	rs2245410	A	0.442188	-0.426901	2.67e-149	7213	0.0164043	0.0858319	677.046
Q9UJJ9	GNPTG	rs6600137	A	0.106474	0.685275	1.25e-149	7213	0.0263033	0.0860075	678.561
Q9UJY5	GGA1	rs12483880	T	0.421461	0.0931995	2.54e-08	7213	0.0167309	0.0042836	31.0219
Q9UK23	NAGPA	rs12599777	G	0.190628	-0.574707	4.75e-170	7213	0.0206753	0.0967558	772.444
Q9UK55	SERPINA10	rs12434093	C	0.166713	0.865278	1e-200	7213	0.0286246	0.112439	913.509
Q9UK85	DKKL1	rs1465697	T	0.246985	-0.160239	5.7e-17	7213	0.0191415	0.00962206	70.0587
Q9UKG9	CROT	rs31659	C	0.10488	-0.60755	2.55e-114	7213	0.0267352	0.0668116	516.272
Q9UKJ1	PILRA	rs1859788	A	0.312561	1.04073	1e-200	7213	0.0344288	0.112439	913.509
Q9UKK9	NUDT5	rs7099650	T	0.489741	-0.100384	2.05e-09	7213	0.016748	0.00495599	35.9156
Q9UKR3	KLK13	rs2569459	T	0.352697	-0.393619	2.08e-116	7213	0.0171624	0.0679692	525.868
Q9UKZ9	PCOLCE2	rs11716897	A	0.344378	0.491823	4.55e-184	7213	0.0169985	0.10399	836.905
Q9UL25	RAB21	rs2864808	G	0.1507	0.20531	1.01e-18	7213	0.0232409	0.0107035	78.0179
Q9UL46	PSME2	rs2236352	C	0.252599	0.312178	5.72e-62	7213	0.0187925	0.0368481	275.877
Q9UM47	NOTCH3	rs4808238	A	0.14973	0.217443	9.65e-21	7213	0.0232813	0.0119492	87.208
Q9UM54	MYO6	rs41269323	A	0.0103979	-0.897535	8.78e-28	7213	0.0821563	0.0162771	119.317
Q9UMF0	ICAM5	rs281439	G	0.234923	-0.786982	1e-200	7213	0.0260344	0.112439	913.509
Q9UMR2	DDX19B	rs138325325	A	0.0135173	-0.715572	4.52e-23	7213	0.0723402	0.0133838	97.8198
Q9UMS0	NFU1	rs74637005	A	0.037779	-0.302771	3.85e-12	7213	0.0436107	0.00663794	48.1861
Q9UN19	DAPP1	rs3822103	T	0.470609	-0.343316	6.98e-98	7213	0.0163507	0.0576016	440.753
Q9UN37	VPS4A	rs9924894	G	0.24747	0.133523	2.78e-12	7213	0.0191063	0.0067253	48.8245
Q9UNA0	ADAMTS5	rs2830585	T	0.160959	-0.912609	1e-200	7213	0.0301903	0.112439	913.509
Q9UNE0	EDAR	rs140661471	A	0.0126854	1.5456	7.19e-101	7213	0.0724906	0.0592886	454.475
Q9UNK0	STX8	rs35082231	T	0.238805	0.329143	6.66e-65	7213	0.0193474	0.0385766	289.337
Q9UNP9	PPIE	rs1046988	T	0.364273	-0.592572	1e-200	7213	0.0196031	0.112439	913.509
Q9UNW1	MINPP1	rs59980852	T	0.458339	-0.150282	1.75e-19	7213	0.0166464	0.0111732	81.4804
Q9UNZ2	NSFL1C	rs4814391	T	0.133786	0.1842	4.29e-14	7213	0.0243913	0.00784467	57.0152
Q9UQ53	MGAT4B	rs113756550	A	0.0206571	-1.57189	5.07e-166	7213	0.0572399	0.0946554	753.923
Q9UQN3	CHMP2B	rs300978	T	0.40933	0.556863	1e-200	7213	0.0184218	0.112439	913.509
Q9Y240	CLEC11A	rs116924815	T	0.028005	1.28774	3.48e-149	7213	0.0495027	0.0857706	676.517
Q9Y259	CHKB	rs5770922	G	0.0484542	-0.503567	6.54e-39	7213	0.038594	0.0230583	170.198
Q9Y274	ST3GAL6	rs28489284	A	0.0455428	-1.6391	1e-200	7213	0.0542236	0.112439	913.509
Q9Y275	TNFSF13B	rs374039502	A	0.0250936	0.345389	5.97e-11	7213	0.0527756	0.00590288	42.8184
Q9Y286	SIGLEC7	rs140185670	C	0.0682102	-0.812856	7.97e-140	7213	0.0322911	0.0807561	633.491
Q9Y294	ASF1A	rs4946366	T	0.180854	0.130473	1.54e-09	7213	0.0216011	0.0050325	36.4729
Q9Y2C2	UST	rs7764228	A	0.446278	0.15576	1.52e-20	7213	0.0167635	0.0118276	86.3097
Q9Y2E5	MAN2B2	rs2301790	G	0.477055	0.925048	1e-200	7213	0.0306018	0.112439	913.509
Q9Y2I2	NTNG1	rs115668827	C	0.0502565	1.29214	1e-200	7213	0.0427457	0.112439	913.509
Q9Y2Y8	PRG3	rs12575356	T	0.113753	-0.146239	1.86e-08	7213	0.0260002	0.00436675	31.6267
Q9Y2Z0	SUGT1	rs185192949	T	0.0406211	-0.263108	4.76e-10	7213	0.042254	0.00534673	38.7625
Q9Y336	SIGLEC9	rs2075803	A	0.432206	1.03012	1e-200	7213	0.0340778	0.112439	913.509
Q9Y376	CAB39	rs7604335	C	0.244836	-0.232338	2.14e-33	7213	0.0192941	0.0197074	144.967
Q9Y3A5	SBDS	rs79344818	G	0.0356994	-1.18714	2.22e-161	7213	0.0438544	0.0922232	732.583
Q9Y3B8	REXO2	rs4938104	G	0.149799	-0.285735	2.43e-34	7213	0.0233825	0.0202829	149.288
Q9Y3C6	PPIL1	rs12194408	G	0.0291141	-1.35786	1.18e-174	7213	0.0481936	0.099145	793.617
Q9Y3C8	UFC1	rs79923112	C	0.0126854	0.453104	1.1e-09	7213	0.0743503	0.00512253	37.1287
Q9Y3D6	FIS1	rs142501950	G	0.0516429	-0.70054	1.45e-78	7213	0.0373315	0.0465476	352.041
Q9Y3E1	HDGFRP3	rs28479338	C	0.0768751	0.213411	6.13e-12	7213	0.0310344	0.00651318	47.2744
Q9Y3E2	BOLA1	rs1044808	C	0.0777762	1.08971	1e-200	7213	0.0360491	0.112439	913.509
Q9Y3E7	VPS24	rs59613942	G	0.154721	0.307012	1.56e-40	7213	0.0230326	0.0240404	177.626
Q9Y4D7	PLXND1	rs1108584	G	0.105365	-0.554971	3.8e-96	7213	0.0266733	0.0566185	432.78
Q9Y4E8	USP15	rs11612349	A	0.112921	0.851842	1e-200	7213	0.0281801	0.112439	913.509
Q9Y4P3	TBL2	rs76029572	G	0.0372245	0.461667	1.69e-25	7213	0.044236	0.0148758	108.889
Q9Y570	PPME1	rs76970567	G	0.0535838	-0.298051	5.2e-16	7213	0.0367659	0.00902893	65.7009
Q9Y5C1	ANGPTL3	rs10889333	A	0.331623	-0.33608	2.7e-84	7213	0.0172757	0.0498527	378.35
Q9Y5P4	COL4A3BP	rs5744681	A	0.0859559	0.259632	7.2e-19	7213	0.029265	0.0107942	78.6863
Q9Y5W5	WIF1	rs462847	T	0.460003	-0.10588	1.95e-10	7213	0.0166341	0.00558572	40.5049
Q9Y5X2	SNX8	rs28514741	C	0.0111604	-0.908082	1.92e-31	7213	0.0778455	0.0185161	136.039
Q9Y5Y7	LYVE1	rs114758648	A	0.0426314	0.490929	1.05e-32	7213	0.04122	0.0192863	141.808
Q9Y617	PSAT1	rs2277148	G	0.215098	-0.390402	1.49e-85	7213	0.0199166	0.0505755	384.127
Q9Y646	CPQ	rs148684432	A	0.0127547	-1.69904	1.4e-121	7213	0.0724613	0.0708235	549.635
Q9Y653	GPR56	rs1801257	G	0.488909	0.162996	7.2e-23	7213	0.0165561	0.0132594	96.8982
Q9Y662	HS3ST3B1	rs62056073	G	0.0218356	-0.464273	2.73e-16	7213	0.0567246	0.00920183	66.9706
Q9Y663	HS3ST3A1	rs139707331	A	0.0140025	0.419599	3.27e-09	7213	0.0709089	0.00483112	35.0063
Q9Y680	FKBP7	rs1863671	C	0.169347	0.767546	1e-200	7213	0.0253915	0.112439	913.509
Q9Y696	CLIC4	rs4649017	C	0.373492	-0.258788	2.96e-53	7213	0.0168464	0.0316795	235.914
Q9Y6F6	MRVI1	rs1075768	A	0.397477	0.214955	1.23e-36	7213	0.0170025	0.0216788	159.79
Q9Y6N7	ROBO1	rs3773232	T	0.198184	0.340381	4.46e-60	7213	0.0208204	0.0357303	267.199
Q9Y6U3	SCIN	rs7803810	A	0.424026	-0.106183	2.62e-10	7213	0.0168018	0.00550661	39.9281
Q9Y6Z7	COLEC10	rs2465383	G	0.448011	-0.121627	2.79e-13	7213	0.0166517	0.00734217	53.336

## Sheet: Table S2
Table S2 Genetic instruments of prioritized proteins for replication
Outcome	Protein	Replication analysis(significant)					Replication analysis(same)
		SNP	effect_allele	eaf	beta	P value	SNP	effect_allele	eaf	beta	P value
BC_overall	TLR1	rs5743618	A	0.3482	0.13	2.0893e-53	rs5743618	A	0.3482	0.13	2.0893e-53
	PDCD6	rs62330028	A	0.0422	0.14	2.69e-11	rs56075848	C	0.05221	0.1073	8.57e-09
	RCL	rs144767533	C	0.0924	-0.16	3.16e-30	rs114371775	CCCTTC	0.09045	-0.1527	4.694e-28
	A4GALT	rs5751348	A	0.483	-0.31	1e-200	rs8138197	A	0.48283	-0.3143	1e-200
	PARK7	rs226251	T	0.3948	-0.09	5.75e-22	rs17523802	A	0.18195	0.142	5.878e-42
	SNUPN	rs8028182	T	0.1657	0.15	1.38038e-44	rs7170787	A	0.19035	0.1403	1.749e-42
	CTSF	rs1791679	A	0.3047	0.18	1.2e-98	rs1044522	A	0.23287	0.1997	2.45e-98
	GCDH	Lack of data					Lack of data
	SEMA4A	rs7695	C	0.3764	0.17	8.31764e-82	rs12401997	C	0.3741	-0.0523	1.12e-80
	LAYN	rs4938792	C	0.3765	-0.05	3.31e-10	rs4938792	C	0.3765	-0.05	3.31e-10
	HAPLN4	rs10403273	G	0.1527	0.11	6.92e-25	rs55762233	G	0.15226	0.1115	1.94e-24
BC_ER（+）	TLR1	rs5743618	A	0.3482	0.13	2.0893e-53	rs5743618	A	0.3482	0.13	2.0893e-53
	GDI2	Lack of data					rs55913768	A	0.34564	-0.0979	1.279e-31
BC_ER（-）	MST1	rs1131095	C	0.3076	-1.23	1e-200	rs3197999	A	0.30259	-1.2282	1e-200
	GPX1	Lack of data					rs9823546	A	0.30756	-0.0286	0.001146
	KDELC2	rs74911261	A	0.02	-1.02	1e-200	rs141379009	G	0.02005	-1.0177	1e-200

## Sheet: Table S3
Table S3 Genetic instruments of BC_overall used in bidirectional MR
SNP	other_allele	effect_allele	eaf	beta	se	pval	R2	F statistics
rs10022462	C	T	0.4379	0.0375	0.0062	1.55e-09	0.00015976	36.5827
rs10054203	G	C	0.4094	0.0383	0.0065	3.21e-09	0.000151622	34.719
rs10096351	A	G	0.5441	0.1055	0.0062	1.97e-64	0.00126308	289.546
rs10760444	G	A	0.5667	-0.0358	0.0062	9.06e-09	0.000145605	33.341
rs10885405	C	T	0.46	0.0465	0.0062	5.44e-14	0.000245625	56.2495
rs10941679	A	G	0.2522	0.1278	0.0071	5.61e-73	0.00141315	323.997
rs10978911	G	C	0.1361	0.0839	0.0091	2.36e-20	0.00037114	85.0036
rs10995201	A	G	0.1591	-0.1317	0.0087	1.56e-51	0.000999899	229.155
rs11117758	G	A	0.2086	-0.0449	0.0076	3.9e-09	0.000152425	34.9029
rs11135046	G	T	0.5529	-0.0717	0.0062	4.68e-31	0.000583793	133.737
rs11205303	T	C	0.3998	0.0497	0.0064	1.14e-14	0.000263327	60.3044
rs1121948	A	G	0.1963	0.0575	0.0077	7.48e-14	0.000243504	55.7636
rs11249433	A	G	0.403	0.0988	0.0065	1.76e-52	0.00100811	231.038
rs113577745	C	G	0.0992	0.064	0.0102	3.91e-10	0.000171926	39.3691
rs115532124	G	A	0.4794	-0.0615	0.0094	5.63e-11	0.000186926	42.8046
rs11571833	A	T	0.0081	0.2727	0.0346	3.1e-15	0.000271242	62.1175
rs11583393	C	A	0.249	-0.0396	0.0072	3.61e-08	0.000132107	30.2497
rs11624333	T	C	0.2595	-0.0968	0.0071	6.5e-42	0.000811221	185.879
rs11672660	C	T	0.213	0.0472	0.008	4.13e-09	0.000152018	34.8097
rs11684853	G	T	0.5606	-0.0442	0.0062	1.12e-12	0.000221933	50.8227
rs11693806	C	G	0.7288	-0.0739	0.007	3.4e-26	0.000486563	111.452
rs117618124	T	C	0.0453	-0.1074	0.0156	5.46e-12	0.000206979	47.3975
rs117737783	G	A	0.0728	0.0747	0.0127	4.03e-09	0.000151086	34.5963
rs11822830	A	G	0.5959	0.0483	0.0063	1.98e-14	0.000256661	58.7773
rs11903787	G	A	0.2405	-0.0451	0.0076	2.36e-09	0.000153786	35.2145
rs11977670	G	A	0.4315	0.0522	0.0063	1.05e-16	0.000299769	68.6525
rs12207986	G	A	0.5362	0.0375	0.0062	1.45e-09	0.00015976	36.5827
rs12250948	T	C	0.7844	-0.0576	0.0074	1.04e-14	0.00026456	60.5868
rs12479355	A	G	0.2088	-0.0426	0.0076	2.36e-08	0.000137211	31.4187
rs12487185	A	G	0.3128	0.045	0.0066	1.21e-11	0.000203005	46.4872
rs12513872	G	A	0.7485	0.0413	0.0073	1.46e-08	0.000139782	32.0074
rs12519859	G	A	0.4748	0.0365	0.0063	5.77e-09	0.000146588	33.5661
rs12545624	A	G	0.0866	0.0609	0.011	2.82e-08	0.000133859	30.6511
rs12546444	A	T	0.1001	-0.0717	0.011	7.45e-11	0.000185537	42.4863
rs12594752	C	T	0.1341	-0.0729	0.0092	1.86e-15	0.000274169	62.7878
rs1268974	A	G	0.6132	-0.0793	0.0063	3.71e-36	0.000691548	158.439
rs13066793	A	G	0.0925	-0.0685	0.0112	1.04e-09	0.000163355	37.406
rs13267382	A	G	0.6493	-0.0437	0.0065	1.6e-11	0.000197382	45.1994
rs1498608	T	A	0.0949	-0.0671	0.0107	3.48e-10	0.000171736	39.3254
rs1511243	A	G	0.8263	0.0778	0.0083	4.34e-21	0.000383613	87.8616
rs1685191	C	T	0.5647	-0.0586	0.0064	3.87e-20	0.000366044	83.8362
rs16991615	G	A	0.0626	0.0758	0.0126	1.92e-09	0.000158047	36.1904
rs1707302	A	G	0.6641	0.0364	0.0066	2.95e-08	0.000132836	30.4166
rs170801	C	A	0.2817	-0.0591	0.007	3.18e-17	0.000311244	71.2812
rs17145151	A	C	0.1203	0.0572	0.0095	1.8e-09	0.000158319	36.2528
rs17156577	T	C	0.1121	0.0578	0.0098	4.25e-09	0.000151913	34.7856
rs17268829	T	C	0.2804	0.0495	0.0068	4.49e-13	0.000231393	52.9894
rs17426269	G	A	0.1488	0.0487	0.0086	1.74e-08	0.000140042	32.0669
rs1778523	C	G	0.3567	-0.0384	0.0066	7.55e-09	0.000147832	33.8509
rs1973765	T	C	0.4001	-0.0817	0.0064	9.71e-38	0.000711267	162.96
rs1985742	A	T	0.3516	0.0588	0.0065	8.1e-20	0.000357298	81.8322
rs2016394	G	A	0.4748	-0.0425	0.0062	6.23e-12	0.000205193	46.9884
rs2253012	C	T	0.4318	0.0433	0.0065	3.13e-11	0.000193786	44.3757
rs2403907	C	A	0.3159	-0.0796	0.0067	1.87e-32	0.000616121	141.147
rs2432539	A	G	0.5996	-0.0349	0.0064	4.02e-08	0.000129865	29.7363
rs2506889	C	T	0.3185	-0.0615	0.0067	2.38e-20	0.000367873	84.2552
rs2747651	G	C	0.5264	0.0662	0.0062	1.8e-26	0.000497707	114.006
rs2787486	A	C	0.3002	-0.0758	0.0068	5.56e-29	0.000542428	124.256
rs28512361	G	A	0.1127	0.0611	0.0109	2.25e-08	0.000137223	31.4214
rs2853669	A	G	0.3061	-0.0651	0.0069	4.05e-21	0.000388644	89.0143
rs2965183	G	A	0.3521	0.0445	0.0065	6.31e-12	0.000204674	46.8694
rs2992756	T	C	0.5194	-0.0506	0.0063	1.6e-15	0.000281679	64.5084
rs332529	G	A	0.1605	-0.0606	0.0089	9.02e-12	0.000202458	46.3619
rs35383942	C	T	0.0562	0.101	0.0139	3.79e-13	0.000230553	52.797
rs35910339	C	G	0.6889	0.0462	0.0067	5.41e-12	0.000207636	47.5478
rs3769821	C	T	0.6683	-0.0565	0.0065	3.97e-18	0.000329902	75.5556
rs3821902	T	G	0.1358	0.0623	0.0089	2.99e-12	0.000213974	48.9996
rs3903072	G	T	0.4727	-0.0434	0.0062	2.25e-12	0.000213974	48.9996
rs4081859	G	A	0.7517	0.0521	0.0073	7.08e-13	0.000222429	50.9361
rs418053	G	C	0.5685	-0.0465	0.0063	1.2e-13	0.000237892	54.478
rs4233486	C	T	0.6514	0.0396	0.0069	9.09e-09	0.000143842	32.9373
rs4286946	C	G	0.1739	-0.0799	0.0083	8.63e-22	0.000404594	92.6688
rs4442975	G	T	0.5021	-0.1274	0.0061	1.14e-95	0.00190156	436.19
rs4496150	C	A	0.2466	-0.0416	0.0072	8.09e-09	0.000145786	33.3824
rs4562056	G	T	0.3323	0.0416	0.0067	4.72e-10	0.000168353	38.5508
rs4702131	T	C	0.5612	-0.0424	0.0062	1e-11	0.000204229	46.7675
rs4784227	C	T	0.2387	0.2153	0.0071	1e-200	0.00400026	919.534
rs4820318	G	A	0.3753	-0.0475	0.0064	1.03e-13	0.000240536	55.0837
rs4848599	T	C	0.8845	0.0933	0.01	1.59e-20	0.000380063	87.0481
rs4971059	G	A	0.3632	0.0424	0.0064	4.83e-11	0.000191666	43.8902
rs4983544	T	G	0.4609	0.0353	0.0063	2.5e-08	0.000137109	31.3953
rs521667	A	C	0.6348	0.0475	0.0066	4.5e-13	0.000226182	51.7959
rs532436	G	A	0.2027	0.0431	0.0078	2.91e-08	0.000133341	30.5324
rs56013747	A	C	0.8273	-0.0497	0.009	3.74e-08	0.000133176	30.4947
rs56387622	T	C	0.1012	-0.0942	0.0106	5.47e-19	0.000344824	78.9744
rs56971155	C	T	0.3934	-0.0424	0.0064	3.63e-11	0.000191666	43.8902
rs57212245	G	A	0.0783	-0.0652	0.0119	4.09e-08	0.0001311	30.0191
rs5995875	C	T	0.1068	0.1206	0.0098	9.04e-35	0.000661017	151.439
rs5997389	G	A	0.0903	0.0791	0.0108	2.19e-13	0.00023424	53.6416
rs60954078	A	G	0.07	0.1817	0.0117	2.84e-54	0.0010523	241.176
rs6122906	A	G	0.1816	0.0507	0.008	2.45e-10	0.000175395	40.1636
rs62048402	G	A	0.4156	-0.0624	0.0063	3.5e-23	0.000428311	98.1035
rs62237573	C	T	0.0092	0.4256	0.034	6.87e-36	0.000683921	156.69
rs62331150	G	T	0.2263	0.0494	0.0074	1.85e-11	0.000194609	44.5643
rs62355901	T	C	0.1602	0.1734	0.0082	3.42e-98	0.00194931	447.164
rs62485509	G	T	0.2292	-0.0545	0.0079	4.45e-12	0.000207829	47.5921
rs630965	C	T	0.6196	0.0992	0.0064	3.21e-54	0.00104825	240.248
rs6436017	A	G	0.5042	0.0399	0.0063	3.42e-10	0.000175164	40.1108
rs6562760	A	G	0.766	0.0443	0.0073	1.49e-09	0.000160823	36.8263
rs6569648	C	T	0.7643	0.0512	0.0073	2.98e-12	0.000214812	49.1915
rs6596100	C	T	0.2427	-0.0439	0.0076	7.74e-09	0.000145712	33.3655
rs6597981	A	G	0.5178	0.0439	0.0062	1.35e-12	0.000218931	50.1351
rs66572733	C	G	0.037	0.095	0.0162	4.74e-09	0.000150179	34.3885
rs67087079	G	A	0.1251	0.0527	0.0093	1.32e-08	0.000140234	32.1108
rs6725517	A	G	0.4088	-0.0468	0.0067	2.93e-12	0.000213062	48.7908
rs6787391	C	T	0.3807	0.0567	0.0064	9.07e-19	0.000342701	78.4878
rs68056147	G	A	0.299	0.0501	0.0069	5.36e-13	0.000230216	52.7198
rs6815814	A	C	0.2525	0.052	0.0072	6.13e-13	0.000227772	52.16
rs6882649	G	T	0.6651	0.0388	0.0066	3.67e-09	0.000150927	34.5598
rs7072776	A	G	0.7124	-0.0618	0.0068	1.75e-19	0.000360628	82.5953
rs7149262	C	A	0.2113	-0.0724	0.0076	2.47e-21	0.000396219	90.7499
rs71557345	G	A	0.0806	-0.0806	0.0129	3.87e-10	0.00017048	39.0379
rs71559437	G	A	0.122	-0.0686	0.0099	5.05e-12	0.000209674	48.0147
rs7223535	G	A	0.268	-0.0439	0.007	3.53e-10	0.000171758	39.3305
rs7258465	T	C	0.3436	-0.0725	0.0066	2.79e-28	0.000526765	120.666
rs72658071	A	T	0.0877	0.1182	0.0107	2.58e-28	0.000532713	122.029
rs72725173	G	A	0.1578	0.0559	0.0085	3.88e-11	0.000188869	43.2496
rs72755295	A	G	0.0309	0.1376	0.0179	1.65e-14	0.000258034	59.0918
rs73031214	C	T	0.2172	0.0474	0.0074	1.91e-10	0.000179173	41.0289
rs73949122	C	G	0.1664	-0.0593	0.0084	1.85e-12	0.000217627	49.8364
rs7500067	A	G	0.2293	0.0785	0.0073	4.06e-27	0.000504814	115.635
rs7626742	G	T	0.5327	0.1046	0.0062	1.61e-63	0.00124165	284.627
rs7650602	T	C	0.4422	0.0489	0.0063	6.22e-15	0.000263075	60.2466
rs76956704	C	T	0.03	0.1352	0.0182	1.27e-13	0.00024097	55.1832
rs7697216	T	C	0.8819	0.1039	0.0098	1.61e-26	0.000490708	112.402
rs77528541	G	T	0.1361	-0.0583	0.0096	1.41e-09	0.000161058	36.88
rs78381082	A	G	0.172	-0.0611	0.0089	5.43e-12	0.000205812	47.1301
rs78440108	C	T	0.1718	-0.0595	0.0084	1.62e-12	0.000219098	50.1732
rs78540526	C	T	0.0756	0.2758	0.0113	1.81e-131	0.00259514	595.7
rs7895676	C	T	0.5216	-0.203	0.0062	1e-200	0.00466055	1072.02
rs7904249	G	A	0.1592	0.0764	0.0084	6.98e-20	0.000361184	82.7226
rs7910243	G	A	0.1896	-0.0676	0.008	2.14e-17	0.000311771	71.4019
rs7971	A	G	0.3531	-0.0365	0.0065	1.93e-08	0.000137707	31.5323
rs8082452	T	G	0.4562	-0.0418	0.0065	1.14e-10	0.000180595	41.3544
rs9284657	C	G	0.5005	0.0366	0.0062	3.36e-09	0.000152184	34.8478
rs9361840	A	G	0.2368	0.0541	0.0072	7.14e-14	0.000246536	56.458
rs941764	A	G	0.3429	0.0463	0.0065	8.21e-13	0.000221563	50.7378
rs9693444	A	C	0.6757	-0.0626	0.0066	1.6e-21	0.000392778	89.9616
rs9833888	G	T	0.2259	0.0457	0.0074	5.15e-10	0.000166554	38.1386
rs9952980	T	C	0.3504	-0.0478	0.0065	1.65e-13	0.000236148	54.0786
rs9954058	G	C	0.0721	-0.0891	0.0122	2.79e-13	0.000232912	53.3374

## Sheet: Table S4
Table S4 Genetic instruments of BC_ER(+) used in bidirectional MR
SNP	other_allele	effect_allele	eaf	beta	se	pval	R2	F statistics
rs10423928	T	A	0.2138	0.0557	0.0095	5.09e-09	0.000208878	34.3762
rs10828249	G	A	0.358	0.0726	0.0077	6.72e-21	0.00053998	88.8969
rs10896047	G	A	0.4858	-0.0493	0.0074	2.32e-11	0.000269671	44.3839
rs10941679	A	G	0.2511	0.1563	0.0084	8.27e-78	0.00209975	346.222
rs10978911	G	C	0.1364	0.0978	0.0107	6.6e-20	0.00050747	83.542
rs10995201	A	G	0.1591	-0.1379	0.0105	1.12e-39	0.00104717	172.482
rs11117758	G	A	0.2082	-0.05	0.0091	4.06e-08	0.000183442	30.1892
rs11133838	A	G	0.5841	-0.0415	0.0075	2.83e-08	0.000186043	30.6174
rs11205277	A	G	0.4308	0.0562	0.0075	8.38e-14	0.000341132	56.1494
rs11249433	A	G	0.4029	0.123	0.0077	4.73e-58	0.00154838	255.166
rs115532124	G	A	0.4797	-0.0753	0.011	6.62e-12	0.000284709	46.8597
rs11571818	T	C	0.0081	0.239	0.0397	1.69e-09	0.000220211	36.2418
rs11624164	C	T	0.2552	-0.1037	0.0086	1.39e-33	0.000882872	145.397
rs11693806	C	G	0.7285	-0.0722	0.0083	3.28e-18	0.000459663	75.6681
rs11822830	A	G	0.5961	0.0445	0.0075	3.33e-09	0.000213907	35.204
rs12110303	G	T	0.16	-0.074	0.0107	4.8e-12	0.000290596	47.8289
rs12481286	G	T	0.2405	0.0507	0.0091	2.8e-08	0.000188613	31.0404
rs12550713	C	G	0.3991	0.1093	0.0075	2.99e-48	0.00128907	212.379
rs12703654	C	A	0.4491	0.0587	0.0077	3.1e-14	0.000353071	58.1152
rs12711947	T	C	0.8983	0.0864	0.0124	3.41e-12	0.000294969	48.5488
rs13267382	A	G	0.6478	-0.0427	0.0077	2.93e-08	0.000186859	30.7517
rs1361549	G	A	0.4191	-0.0451	0.0075	1.56e-09	0.000219713	36.1597
rs1432679	C	T	0.5669	-0.0695	0.0074	5.77e-21	0.000535789	88.2066
rs1685191	C	T	0.5677	-0.0635	0.0077	1.52e-16	0.000413149	68.0081
rs16867692	A	G	0.197	0.0576	0.0096	2.1e-09	0.00021874	35.9996
rs17035305	C	A	0.3146	-0.0436	0.0079	4.15e-08	0.00018508	30.4589
rs1707302	A	G	0.664	0.0466	0.0078	2.75e-09	0.000216875	35.6925
rs170801	C	A	0.2812	-0.0794	0.0084	2.99e-21	0.000542709	89.3464
rs17268829	T	C	0.2796	0.0517	0.0082	2.4e-10	0.000241529	39.751
rs17426269	G	A	0.1488	0.0576	0.0103	1.89e-08	0.000190024	31.2727
rs17617028	G	A	0.2265	0.0569	0.0087	7.64e-11	0.000259892	42.7741
rs17838698	C	T	0.2978	0.0624	0.008	5.78e-15	0.000369615	60.8393
rs1812715	A	G	0.6943	0.0908	0.0081	2.66e-29	0.000763116	125.66
rs2009607	A	T	0.0453	0.1165	0.0202	8.47e-09	0.000202107	33.2617
rs2016394	G	A	0.4753	-0.0603	0.0074	3.22e-16	0.000403382	66.3997
rs2253012	C	T	0.432	0.0511	0.0078	5.19e-11	0.000260771	42.9188
rs2403907	C	A	0.3166	-0.0964	0.008	2.95e-33	0.000881681	145.201
rs2461201	C	T	0.3483	0.0473	0.0078	1.67e-09	0.000223438	36.7729
rs2735846	C	G	0.5039	-0.0445	0.0075	3.53e-09	0.000213907	35.204
rs28649231	G	A	0.1907	0.0651	0.0095	8.8e-12	0.000285306	46.958
rs2957449	T	C	0.5331	0.0475	0.0076	5.24e-10	0.000237344	39.062
rs2992756	T	C	0.5202	-0.0608	0.0076	9.93e-16	0.000388805	63.9992
rs310302	G	A	0.4023	0.0444	0.0075	3.63e-09	0.000212947	35.046
rs3217992	C	T	0.3749	-0.0576	0.0076	4.6e-14	0.000348969	57.4397
rs34196306	G	C	0.0833	-0.0889	0.015	2.99e-09	0.000213427	35.125
rs35273427	T	C	0.0599	0.0937	0.016	4.87e-09	0.000208386	34.2952
rs35353761	A	G	0.2251	-0.06	0.01	1.74e-09	0.00021874	35.9996
rs35383942	C	T	0.0561	0.0918	0.0164	2.33e-08	0.000190386	31.3323
rs3769821	C	T	0.6678	-0.0545	0.0078	2.09e-12	0.000296617	48.8201
rs3821902	T	G	0.1357	0.0589	0.0106	3.18e-08	0.000187611	30.8755
rs4076654	A	T	0.3654	-0.0595	0.0079	4.16e-14	0.000344628	56.725
rs418053	G	C	0.5682	-0.0524	0.0075	2.28e-12	0.000296573	48.8129
rs4286946	C	G	0.1742	-0.0748	0.0099	4.91e-14	0.000346819	57.0857
rs4361315	G	A	0.7316	-0.0547	0.0087	2.59e-10	0.000240189	39.5304
rs4442975	G	T	0.5018	-0.1482	0.0073	6.65e-91	0.00249853	412.141
rs4703870	G	A	0.7537	0.0613	0.0088	3.32e-12	0.000294814	48.5233
rs4752569	A	T	0.4866	0.2298	0.0076	1e-200	0.0055257	914.256
rs4784227	C	T	0.2385	0.2296	0.0084	3.93e-164	0.00452	747.102
rs4820318	G	A	0.3749	-0.0632	0.0076	1.1e-16	0.000420093	69.1515
rs4894562	G	A	0.2171	0.0519	0.0089	4.57e-09	0.000206626	34.0055
rs490706	G	A	0.5247	0.1148	0.0074	3.28e-54	0.00146051	240.666
rs4918816	C	T	0.2604	0.0564	0.0084	1.54e-11	0.000273906	45.0811
rs4971059	G	A	0.3636	0.0519	0.0077	1.27e-11	0.000276029	45.4305
rs4980029	A	G	0.163	0.0759	0.0098	1.24e-14	0.000364413	59.9827
rs521667	A	C	0.6342	0.0482	0.0078	5.87e-10	0.00023202	38.1856
rs56083805	T	C	0.2422	-0.0595	0.0091	7.01e-11	0.000259752	42.751
rs56387622	T	C	0.1012	-0.0991	0.0127	5.28e-15	0.000369913	60.8884
rs5997389	G	A	0.0901	0.0882	0.0128	6.23e-12	0.000288478	47.4801
rs6001982	C	A	0.1068	0.1109	0.0117	2.05e-21	0.000545726	89.8434
rs6062356	T	G	0.1493	0.0564	0.0103	4.13e-08	0.00018219	29.9832
rs60954078	A	G	0.0701	0.1392	0.014	2.21e-23	0.000600457	98.8592
rs62048402	G	A	0.4164	-0.0593	0.0075	2.16e-15	0.000379789	62.5146
rs62237573	C	T	0.0091	0.4396	0.0386	4.94e-30	0.000787624	129.699
rs62247166	C	T	0.475	-0.0406	0.0074	3.92e-08	0.000182907	30.1012
rs62355902	A	T	0.1587	0.2032	0.0098	2.88e-96	0.00260605	429.922
rs62485509	G	T	0.2289	-0.053	0.0094	1.6e-08	0.000193167	31.79
rs6472903	G	T	0.8265	0.0784	0.0099	2.01e-15	0.000380993	62.7128
rs6762558	A	G	0.3868	0.0618	0.0076	3.18e-16	0.000401694	66.1218
rs6815814	A	C	0.2543	0.055	0.0086	1.59e-10	0.000248508	40.9
rs688601	T	A	0.5503	-0.0832	0.0074	1.89e-29	0.000767662	126.409
rs6904031	A	T	0.0647	0.1107	0.0148	6.67e-14	0.000339895	55.9457
rs6938	C	G	0.6545	0.0446	0.0081	3.72e-08	0.000184221	30.3176
rs7017073	T	C	0.2114	0.0628	0.0089	1.77e-12	0.000302502	49.7891
rs7149262	C	A	0.2113	-0.0804	0.0091	1.45e-18	0.000474181	78.0592
rs7153397	C	T	0.6952	0.0536	0.0081	3.36e-11	0.000266051	43.7879
rs71559437	G	A	0.1214	-0.0794	0.0119	2.79e-11	0.000270489	44.5186
rs7223535	G	A	0.268	-0.0463	0.0084	3.2e-08	0.000184605	30.3807
rs72658071	A	T	0.0873	0.1187	0.0128	1.37e-20	0.000522366	85.9956
rs72755295	A	G	0.0311	0.1481	0.0208	1.08e-12	0.000308014	50.6965
rs7280197	T	C	0.3778	0.0461	0.0082	1.7e-08	0.000192049	31.606
rs7463114	T	C	0.6757	-0.0684	0.0078	2.44e-18	0.000467133	76.8985
rs7500067	A	G	0.2301	0.0819	0.0086	2.26e-21	0.000550874	90.6913
rs7650602	T	C	0.4421	0.0571	0.0075	2.27e-14	0.000352142	57.9621
rs7697216	T	C	0.882	0.1338	0.0118	6.06e-30	0.000780782	128.571
rs7729559	C	T	0.2217	0.057	0.0088	9.31e-11	0.000254914	41.9546
rs78029804	C	T	0.134	-0.076	0.011	4.57e-12	0.000290026	47.735
rs78540526	C	T	0.0759	0.3277	0.0132	1.02e-136	0.00373166	616.311
rs7862747	C	A	0.6224	0.1237	0.0077	3.36e-58	0.00156602	258.079
rs80046058	A	T	0.2372	-0.0498	0.0088	1.45e-08	0.000194594	32.0249
rs8105994	T	C	0.3454	-0.0768	0.0078	8.65e-23	0.000588841	96.9456
rs811458	T	C	0.6879	0.0511	0.008	1.72e-10	0.000247899	40.7997
rs889310	C	T	0.5601	0.0462	0.0078	3.74e-09	0.000213168	35.0824
rs9421410	G	A	0.3274	-0.0599	0.008	6.03e-14	0.000340601	56.062
rs946008	C	T	0.495	-0.0861	0.0077	8.91e-29	0.000759304	125.032
rs9952980	T	C	0.3499	-0.0549	0.0078	1.48e-12	0.000300985	49.5393
rs9954058	G	C	0.0718	-0.1057	0.0147	6.06e-13	0.000314123	51.7023

## Sheet: Table S5
Table S5 Genetic instruments of BC_ER(-) used in bidirectional MR
SNP	other_allele	effect_allele	eaf	beta	se	pval	R2	F statistics
rs10069690	C	T	0.2601	0.1613	0.013	1.54e-35	0.00125966	153.948
rs10096351	A	G	0.5455	0.07	0.0114	7.14e-10	0.000308796	37.7033
rs10179592	T	C	0.8991	0.1156	0.0193	2.3e-09	0.000293828	35.8752
rs10885405	C	T	0.4613	0.0716	0.0113	2e-10	0.000328811	40.1478
rs10995201	A	G	0.1582	-0.0963	0.0159	1.57e-09	0.000300433	36.6818
rs11076805	C	A	0.2543	-0.0782	0.014	2.15e-08	0.000255544	31.1997
rs11571833	A	T	0.0081	0.4346	0.0588	1.49e-13	0.000447353	54.6283
rs12129456	T	G	0.4095	-0.0835	0.0118	1.41e-12	0.000410063	50.0728
rs12472404	G	C	0.2316	-0.0879	0.0137	1.24e-10	0.00033714	41.1651
rs12990503	C	G	0.7368	-0.0734	0.0126	6.48e-09	0.000277939	33.9347
rs1432679	C	T	0.5656	-0.073	0.0113	1.06e-10	0.00034179	41.7332
rs17828955	T	C	0.2649	-0.0797	0.013	7.76e-10	0.000307833	37.5857
rs183438976	C	T	0.0997	0.1285	0.0186	4.51e-12	0.000390868	47.728
rs189268208	A	G	0.0858	0.1116	0.0196	1.32e-08	0.000265534	32.4197
rs191981806	T	C	0.0275	0.1963	0.036	4.94e-08	0.000243528	29.7323
rs2169137	G	C	0.7396	-0.128	0.0128	1.42e-23	0.000818585	99.9984
rs2263146	C	T	0.3504	0.0797	0.0118	1.2e-11	0.000373603	45.619
rs2731830	G	A	0.9644	-0.2345	0.0419	2.25e-08	0.000256546	31.3221
rs2735846	C	G	0.5045	-0.0831	0.0117	1.35e-12	0.000413114	50.4456
rs2747652	T	C	0.526	0.0991	0.0113	1.93e-18	0.000629704	76.9101
rs34697209	A	G	0.4064	-0.0673	0.0122	3.24e-08	0.000249242	30.4301
rs34810249	T	C	0.2438	0.0804	0.0138	5.43e-09	0.000278005	33.9427
rs3769823	A	G	0.7071	-0.0684	0.0121	1.76e-08	0.000261726	31.9547
rs4143044	T	G	0.7661	0.0833	0.0135	6.89e-10	0.000311822	38.0728
rs4528762	A	C	0.2646	-0.1213	0.0147	1.92e-16	0.000557525	68.0894
rs4754322	T	C	0.4157	-0.0629	0.0115	4.26e-08	0.00024503	29.9157
rs4784227	C	T	0.2403	0.1368	0.0128	1.72e-26	0.000934901	114.221
rs55872725	C	T	0.4152	-0.0784	0.0115	8.59e-12	0.000380619	46.4761
rs56069439	C	A	0.2971	0.155	0.0121	1.25e-37	0.00134254	164.091
rs56309329	A	T	0.2368	0.0734	0.0131	2.1e-08	0.000257133	31.3937
rs56687477	G	A	0.1577	-0.1114	0.016	3.19e-12	0.000396988	48.4756
rs616402	C	T	0.307	-0.1172	0.0124	2.65e-21	0.00073133	89.3315
rs62116991	G	C	0.4205	0.0674	0.0116	5.44e-09	0.000276505	33.7596
rs6569648	C	T	0.7651	0.0741	0.0135	4.26e-08	0.000246764	30.1274
rs76956704	C	T	0.03	0.2193	0.0325	1.5e-11	0.000372879	45.5306
rs7710996	A	G	0.7729	-0.0773	0.0132	5.19e-09	0.000280872	34.2929
rs9397437	G	A	0.0682	0.2733	0.0206	2.76e-40	0.00143992	176.01

## Sheet: Table S6
Table S6 GWAS catalog of 525 diseases used for phenome-wide Mendelian Randomization analysis
GWAS ID (IEU OpenGWAS project)	disease	ICD-10 code	number of cases	sample size	prevalence
ukb-d-A41	Diagnoses - main ICD10: A41 Other septicaemia	A41	1096	361194	0.003
ukb-b-3683	Diagnoses - main ICD10: B34.9 Viral infection, unspecified	B34.9	1038	463010	0.0022
ukb-a-517	Diagnoses - main ICD10: B37 Candidiasis	B37	153	337199	0.0005
ukb-b-4423	Diagnoses - secondary ICD10: B95.6 Staphylococcus aureus as the cause of diseases classified to other chapters	B95.6	1716	463010	0.0037
ukb-b-8877	Diagnoses - secondary ICD10: B96.2 Escherichia coli [E. coli] as the cause of diseases classified to other chapters	B96.2	1551	463010	0.0033
ukb-b-20513	Diagnoses - secondary ICD10: B96.8 Other specified bacterial agents as the cause of diseases classified to other chapters	B96.8	4564	463010	0.0099
ukb-d-C18	Diagnoses - main ICD10: C18 Malignant neoplasm of colon	C18	2226	361194	0.0062
ukb-b-15775	Type of cancer: ICD10: C18.7 Sigmoid colon	C18.7	1241	463010	0.0027
ukb-b-1251	Type of cancer: ICD10: C20 Malignant neoplasm of rectum	C20	1470	463010	0.0032
ukb-d-C34	Diagnoses - main ICD10: C34 Malignant neoplasm of bronchus and lung	C34	1427	361194	0.004
ukb-b-18798	Type of cancer: ICD10: C34.1 Upper lobe, bronchus or lung	C34.1	1002	463010	0.0022
ukb-d-40001_C349	Underlying (primary) cause of death: ICD10: C34.9 Bronchus or lung, unspecified	C34.9	1100	9092	0.121
ukb-d-C43	Diagnoses - main ICD10: C43 Malignant melanoma of skin	C43	1672	361194	0.0046
ukb-b-2750	Type of cancer: ICD10: C43.7 Malignant melanoma of lower limb, including hip	C43.7	1058	463010	0.0023
ukb-a-518	Diagnoses - main ICD10: C44 Other malignant neoplasms of skin	C44	4826	337199	0.0143
ukb-b-10248	Type of cancer: ICD10: C44.3 Skin of other and unspecified parts of face	C44.3	6034	463010	0.013
ukb-b-17174	Type of cancer: ICD10: C44.4 Skin of scalp and neck	C44.4	1225	463010	0.0026
ukb-b-15685	Type of cancer: ICD10: C44.5 Skin of trunk	C44.5	2605	463010	0.0056
ukb-b-19078	Type of cancer: ICD10: C44.6 Skin of upper limb, including shoulder	C44.6	1375	463010	0.003
ukb-b-6994	Type of cancer: ICD10: C44.7 Skin of lower limb, including hip	C44.7	1067	463010	0.0023
ukb-b-8416	Type of cancer: ICD10: C44.9 Malignant neoplasm of skin, unspecified	C44.9	3372	463010	0.0073
ukb-a-519	Diagnoses - main ICD10: C50 Malignant neoplasm of breast	C50	5510	337199	0.0163
ukb-b-12115	Diagnoses - main ICD10: C50.4 Upper-outer quadrant of breast	C50.4	1445	463010	0.0031
ukb-b-19041	Type of cancer: ICD10: C50.9 Breast, unspecified	C50.9	6192	463010	0.0134
ukb-b-14956	Type of cancer: ICD10: C54.1 Endometrium	C54.1	1494	463010	0.0032
ukb-b-18157	Type of cancer: ICD10: C56 Malignant neoplasm of ovary	C56	1087	463010	0.0023
ukb-a-520	Diagnoses - main ICD10: C61 Malignant neoplasm of prostate	C61	2273	337199	0.0067
ukb-b-1316	Type of cancer: ICD10: C64 Malignant neoplasm of kidney, except renal pelvis	C64	1114	463010	0.0024
ukb-d-C67	Diagnoses - main ICD10: C67 Malignant neoplasm of bladder	C67	1554	361194	0.0043
ukb-b-5421	Diagnoses - main ICD10: C67.9 Bladder, unspecified	C67.9	1380	463010	0.003
ukb-b-1702	Diagnoses - secondary ICD10: C77.3 Axillary and upper limb lymph nodes	C77.3	1580	463010	0.0034
ukb-d-C78	Diagnoses - main ICD10: C78 Secondary malignant neoplasm of respiratory and digestive organs	C78	1378	361194	0.0038
ukb-b-16713	Diagnoses - secondary ICD10: C78.7 Secondary malignant neoplasm of liver	C78.7	1139	463010	0.0025
ukb-d-C79	Diagnoses - main ICD10: C79 Secondary malignant neoplasm of other sites	C79	1099	361194	0.003
ukb-d-D05	Diagnoses - main ICD10: D05 Carcinoma in situ of breast	D05	1454	361194	0.004
ukb-b-4674	Type of cancer: ICD10: D05.1 Intraductal carcinoma in situ	D05.1	1917	463010	0.0041
ukb-b-918	Type of cancer: ICD10: D06.9 Cervix, unspecified	D06.9	3175	463010	0.0069
ukb-a-521	Diagnoses - main ICD10: D12 Benign neoplasm of colon rectum anus and anal canal	D12	4794	337199	0.0142
ukb-b-10623	Diagnoses - main ICD10: D12.5 Sigmoid colon	D12.5	2447	463010	0.0053
ukb-b-19266	Diagnoses - main ICD10: D12.6 Colon, unspecified	D12.6	1870	463010	0.004
ukb-b-9321	Diagnoses - main ICD10: D12.8 Rectum	D12.8	1509	463010	0.0033
ukb-d-D17	Diagnoses - main ICD10: D17 Benign lipomatous neoplasm	D17	4314	361194	0.0119
ukb-b-2561	Diagnoses - main ICD10: D17.1 Benign lipomatous neoplasm of skin and subcutaneous tissue of trunk	D17.1	2006	463010	0.0043
ukb-b-212	Diagnoses - main ICD10: D17.2 Benign lipomatous neoplasm of skin and subcutaneous tissue of limbs	D17.2	1514	463010	0.0033
ukb-d-D22	Diagnoses - main ICD10: D22 Melanocytic naevi	D22	3501	361194	0.0097
ukb-b-3596	Diagnoses - main ICD10: D22.3 Melanocytic naevi of other and unspecified parts of face	D22.3	1472	463010	0.0032
ukb-d-D23	Diagnoses - main ICD10: D23 Other benign neoplasms of skin	D23	3085	361194	0.0085
ukb-b-8549	Diagnoses - main ICD10: D24 Benign neoplasm of breast	D24	1244	463010	0.0027
ukb-a-522	Diagnoses - main ICD10: D25 Leiomyoma of uterus	D25	4351	337199	0.0129
ukb-b-6528	Diagnoses - secondary ICD10: D25.9 Leiomyoma of uterus, unspecified	D25.9	3024	463010	0.0065
ukb-d-D50	Diagnoses - main ICD10: D50 Iron deficiency anaemia	D50	3222	361194	0.0089
ukb-b-3355	Diagnoses - main ICD10: D50.9 Iron deficiency anaemia, unspecified	D50.9	2066	463010	0.0045
ukb-d-D64	Diagnoses - main ICD10: D64 Other anaemias	D64	3702	361194	0.0102
ukb-b-14765	Diagnoses - main ICD10: D64.9 Anaemia, unspecified	D64.9	3709	463010	0.008
ukb-b-3229	Diagnoses - secondary ICD10: D70 Agranulocytosis	D70	1108	463010	0.0024
ukb-a-523	Diagnoses - main ICD10: E03 Other hypothyroidism	E03	89	337199	0.0003
ukb-b-4226	Diagnoses - secondary ICD10: E03.9 Hypothyroidism, unspecified	E03.9	9674	463010	0.0209
ukb-a-524	Diagnoses - main ICD10: E04 Other non-toxic goitre	E04	745	337199	0.0022
ukb-b-10694	Diagnoses - secondary ICD10: E10.9 Without complications	E10.9	2076	463010	0.0045
ukb-b-970	Diagnoses - secondary ICD10: E11.9 Without complications	E11.9	12045	463010	0.026
ukb-b-17532	Diagnoses - secondary ICD10: E14.9 Without complications	E14.9	1305	463010	0.0028
ukb-b-15541	Diagnoses - secondary ICD10: E66.9 Obesity, unspecified	E66.9	4688	463010	0.0101
ukb-b-12651	Diagnoses - secondary ICD10: E78.0 Pure hypercholesterolaemia	E78.0	22622	463010	0.0489
ukb-b-17462	Diagnoses - secondary ICD10: E78.5 Hyperlipidaemia, unspecified	E78.5	3439	463010	0.0074
ukb-a-357	Underlying (primary) cause of death: ICD10: E85.4 Organ-limited amyloidosis	E85.4	7	7637	0.0009
ukb-b-16319	Diagnoses - secondary ICD10: E86 Volume depletion	E86	1149	463010	0.0025
ukb-b-1176	Diagnoses - secondary ICD10: F10.0 Acute intoxication	F10.0	1204	463010	0.0026
ukb-b-16056	Diagnoses - secondary ICD10: F10.1 Harmful use	F10.1	1802	463010	0.0039
ukb-b-19651	Diagnoses - secondary ICD10: F10.2 Dependence syndrome	F10.2	1290	463010	0.0028
ukb-b-2964	Diagnoses - secondary ICD10: F17.1 Harmful use	F17.1	1483	463010	0.0032
ukb-a-525	Diagnoses - main ICD10: F31 Bipolar affective disorder	F31	303	337199	0.0009
ukb-b-20045	Diagnoses - secondary ICD10: F32.9 Depressive episode, unspecified	F32.9	5842	463010	0.0126
ukb-b-11311	Diagnoses - secondary ICD10: F41.9 Anxiety disorder, unspecified	F41.9	1523	463010	0.0033
ukb-a-526	Diagnoses - main ICD10: F43 Reaction to severe stress and adjustment disorders	F43	182	337199	0.0005
ukb-b-1600	Diagnoses - secondary ICD10: G40.9 Epilepsy, unspecified	G40.9	2326	463010	0.005
ukb-d-G43	Diagnoses - main ICD10: G43 Migraine	G43	1072	361194	0.003
ukb-b-13190	Diagnoses - main ICD10: G43.9 Migraine, unspecified	G43.9	1001	463010	0.0022
ukb-d-G45	Diagnoses - main ICD10: G45 Transient cerebral ischaemic attacks and related syndromes	G45	1744	361194	0.0048
ukb-b-13391	Diagnoses - main ICD10: G45.9 Transient cerebral ischaemic attack, unspecified	G45.9	1364	463010	0.0029
ukb-a-527	Diagnoses - main ICD10: G47 Sleep disorders	G47	2025	337199	0.006
ukb-b-16781	Diagnoses - main ICD10: G47.3 Sleep apnoea	G47.3	2320	463010	0.005
ukb-b-1220	Diagnoses - secondary ICD10: G55.1 Nerve root and plexus compressions in intervertebral disk disorders	G55.1	2298	463010	0.005
ukb-a-528	Diagnoses - main ICD10: G56 Mononeuropathies of upper limb	G56	5886	337199	0.0175
ukb-b-3965	Diagnoses - main ICD10: G56.0 Carpal tunnel syndrome	G56.0	8289	463010	0.0179
ukb-d-G57	Diagnoses - main ICD10: G57 Mononeuropathies of lower limb	G57	1111	361194	0.0031
ukb-d-H00	Diagnoses - main ICD10: H00 Hordeolum and chalazion	H00	1467	361194	0.0041
ukb-b-4637	Diagnoses - main ICD10: H00.1 Chalazion	H00.1	1551	463010	0.0033
ukb-d-H02	Diagnoses - main ICD10: H02 Other disorders of eyelid	H02	4294	361194	0.0119
ukb-b-9565	Diagnoses - main ICD10: H02.8 Other specified disorders of eyelid	H02.8	1739	463010	0.0038
ukb-d-H04	Diagnoses - main ICD10: H04 Disorders of lachrymal system	H04	1476	361194	0.0041
ukb-a-529	Diagnoses - main ICD10: H25 Senile cataract	H25	2651	337199	0.0079
ukb-b-2285	Diagnoses - main ICD10: H25.0 Senile incipient cataract	H25.0	1061	463010	0.0023
ukb-b-3095	Diagnoses - main ICD10: H25.1 Senile nuclear cataract	H25.1	1960	463010	0.0042
ukb-a-530	Diagnoses - main ICD10: H26 Other cataract	H26	6025	337199	0.0179
ukb-b-12397	Diagnoses - main ICD10: H26.9 Cataract, unspecified	H26.9	8890	463010	0.0192
ukb-d-H33	Diagnoses - main ICD10: H33 Retinal detachments and breaks	H33	2671	361194	0.0074
ukb-d-H35	Diagnoses - main ICD10: H35 Other retinal disorders	H35	1551	361194	0.0043
ukb-d-H40	Diagnoses - main ICD10: H40 Glaucoma	H40	1715	361194	0.0047
ukb-a-531	Diagnoses - main ICD10: I10 Essential (primary) hypertension	I10	500	337199	0.0015
ukb-b-19955	Diagnoses - secondary ICD10: I12.0 Hypertensive renal disease with renal failure	I12.0	1146	463010	0.0025
ukb-a-532	Diagnoses - main ICD10: I20 Angina pectoris	I20	4837	337199	0.0143
ukb-b-10756	Diagnoses - secondary ICD10: I20.0 Unstable angina	I20.0	1543	463010	0.0033
ukb-b-14206	Diagnoses - main ICD10: I20.9 Angina pectoris, unspecified	I20.9	4256	463010	0.0092
ukb-a-533	Diagnoses - main ICD10: I21 Acute myocardial infarction	I21	3927	337199	0.0116
ukb-b-453	Diagnoses - main ICD10: I21.0 Acute transmural myocardial infarction of anterior wall	I21.0	1294	463010	0.0028
ukb-b-5126	Diagnoses - main ICD10: I21.1 Acute transmural myocardial infarction of inferior wall	I21.1	1673	463010	0.0036
ukb-b-3469	Diagnoses - main ICD10: I21.9 Acute myocardial infarction, unspecified	I21.9	2321	463010	0.005
ukb-a-534	Diagnoses - main ICD10: I25 Chronic ischaemic heart disease	I25	8755	337199	0.026
ukb-b-1668	Diagnoses - main ICD10: I25.1 Atherosclerotic heart disease	I25.1	12171	463010	0.0263
ukb-b-16662	Diagnoses - secondary ICD10: I25.2 Old myocardial infarction	I25.2	3340	463010	0.0072
ukb-b-16606	Diagnoses - secondary ICD10: I25.8 Other forms of chronic ischaemic heart disease	I25.8	5738	463010	0.0124
ukb-b-3983	Diagnoses - main ICD10: I25.9 Chronic ischaemic heart disease, unspecified	I25.9	1195	463010	0.0026
ukb-d-I26	Diagnoses - main ICD10: I26 Pulmonary embolism	I26	2118	361194	0.0059
ukb-b-18366	Diagnoses - main ICD10: I26.9 Pulmonary embolism without mention of acute cor pulmonale	I26.9	1846	463010	0.004
ukb-a-535	Diagnoses - main ICD10: I30 Acute pericarditis	I30	107	337199	0.0003
ukb-b-13525	Diagnoses - secondary ICD10: I34.0 Mitral (valve) insufficiency	I34.0	1021	463010	0.0022
ukb-d-I47	Diagnoses - main ICD10: I47 Paroxysmal tachycardia	I47	1685	361194	0.0047
ukb-b-11748	Diagnoses - main ICD10: I47.1 Supraventricular tachycardia	I47.1	1306	463010	0.0028
ukb-a-536	Diagnoses - main ICD10: I48 Atrial fibrillation and flutter	I48	3818	337199	0.0113
ukb-d-I50	Diagnoses - main ICD10: I50 Heart failure	I50	1088	361194	0.003
ukb-b-10555	Diagnoses - secondary ICD10: I50.1 Left ventricular failure	I50.1	2046	463010	0.0044
ukb-b-16292	Diagnoses - secondary ICD10: I51.7 Cardiomegaly	I51.7	1326	463010	0.0029
ukb-d-I63	Diagnoses - main ICD10: I63 Cerebral infarction	I63	2353	361194	0.0065
ukb-b-19350	Diagnoses - main ICD10: I63.9 Cerebral infarction, unspecified	I63.9	1420	463010	0.0031
ukb-b-4929	Diagnoses - secondary ICD10: I73.9 Peripheral vascular disease, unspecified	I73.9	1456	463010	0.0031
ukb-a-537	Diagnoses - main ICD10: I80 Phlebitis and thrombophlebitis	I80	1613	337199	0.0048
ukb-b-12267	Diagnoses - main ICD10: I80.2 Phlebitis and thrombophlebitis of other deep vessels of lower extremities	I80.2	1832	463010	0.004
ukb-a-539	Diagnoses - main ICD10: I84 Haemorrhoids	I84	8190	337199	0.0243
ukb-b-14416	Diagnoses - main ICD10: I84.1 Internal haemorrhoids with other complications	I84.1	1549	463010	0.0033
ukb-b-1259	Diagnoses - secondary ICD10: I84.2 Internal haemorrhoids without complication	I84.2	1229	463010	0.0027
ukb-b-1228	Diagnoses - secondary ICD10: I84.6 Residual haemorrhoidal skin tags	I84.6	1710	463010	0.0037
ukb-b-7444	Diagnoses - main ICD10: I84.8 Unspecified haemorrhoids with other complications	I84.8	2321	463010	0.005
ukb-b-11261	Diagnoses - main ICD10: I84.9 Unspecified haemorrhoids without complication	I84.9	6198	463010	0.0134
ukb-b-8855	Diagnoses - secondary ICD10: I95.9 Hypotension, unspecified	I95.9	1666	463010	0.0036
ukb-d-J18	Diagnoses - main ICD10: J18 Pneumonia, organism unspecified	J18	4630	361194	0.0128
ukb-b-1761	Diagnoses - secondary ICD10: J18.1 Lobar pneumonia, unspecified	J18.1	1045	463010	0.0023
ukb-b-15606	Diagnoses - main ICD10: J18.9 Pneumonia, unspecified	J18.9	1611	463010	0.0035
ukb-a-540	Diagnoses - main ICD10: J22 Unspecified acute lower respiratory infection	J22	1992	337199	0.0059
ukb-d-J32	Diagnoses - main ICD10: J32 Chronic sinusitis	J32	1179	361194	0.0033
ukb-a-541	Diagnoses - main ICD10: J33 Nasal polyp	J33	1637	337199	0.0049
ukb-b-7211	Diagnoses - main ICD10: J33.9 Nasal polyp, unspecified	J33.9	1373	463010	0.003
ukb-a-542	Diagnoses - main ICD10: J34 Other disorders of nose and nasal sinuses	J34	3433	337199	0.0102
ukb-b-3770	Diagnoses - main ICD10: J34.2 Deviated nasal septum	J34.2	3256	463010	0.007
ukb-b-5815	Diagnoses - secondary ICD10: J34.3 Hypertrophy of nasal turbinates	J34.3	1208	463010	0.0026
ukb-b-19045	Diagnoses - main ICD10: J34.8 Other specified disorders of nose and nasal sinuses	J34.8	1567	463010	0.0034
ukb-d-J38	Diagnoses - main ICD10: J38 Diseases of vocal cords and larynx, not elsewhere classified	J38	1168	361194	0.0032
ukb-a-543	Diagnoses - main ICD10: J44 Other chronic obstructive pulmonary disease	J44	874	337199	0.0026
ukb-b-16751	Diagnoses - secondary ICD10: J44.9 Chronic obstructive pulmonary disease, unspecified	J44.9	3871	463010	0.0084
ukb-d-J45	Diagnoses - main ICD10: J45 Asthma	J45	1693	361194	0.0047
ukb-b-17219	Diagnoses - secondary ICD10: J45.9 Asthma, unspecified	J45.9	18988	463010	0.041
ukb-a-358	Underlying (primary) cause of death: ICD10: J84.1 Other interstitial pulmonary diseases with fibrosis	J84.1	96	7637	0.0126
ukb-b-9925	Diagnoses - secondary ICD10: J90 Pleural effusion, not elsewhere classified	J90	2411	463010	0.0052
ukb-d-K01	Diagnoses - main ICD10: K01 Embedded and impacted teeth	K01	1443	361194	0.004
ukb-b-7534	Diagnoses - main ICD10: K01.1 Impacted teeth	K01.1	1596	463010	0.0034
ukb-d-K02	Diagnoses - main ICD10: K02 Dental caries	K02	2110	361194	0.0058
ukb-b-4770	Diagnoses - main ICD10: K02.9 Dental caries, unspecified	K02.9	1997	463010	0.0043
ukb-d-K04	Diagnoses - main ICD10: K04 Diseases of pulp and periapical tissues	K04	1609	361194	0.0045
ukb-d-K08	Diagnoses - main ICD10: K08 Other disorders of teeth and supporting structures	K08	1838	361194	0.0051
ukb-b-11771	Diagnoses - main ICD10: K08.3 Retained dental root	K08.3	1039	463010	0.0022
ukb-d-K13	Diagnoses - main ICD10: K13 Other diseases of lip and oral mucosa	K13	2157	361194	0.006
ukb-b-18785	Diagnoses - main ICD10: K13.7 Other and unspecified lesions of oral mucosa	K13.7	1124	463010	0.0024
ukb-a-544	Diagnoses - main ICD10: K20 Oesophagitis	K20	3369	337199	0.01
ukb-a-545	Diagnoses - main ICD10: K21 Gastro-oesophageal reflux disease	K21	7282	337199	0.0216
ukb-b-10144	Diagnoses - secondary ICD10: K21.0 Gastro-oesophageal reflux disease with oesophagitis	K21.0	2241	463010	0.0048
ukb-b-1386	Diagnoses - main ICD10: K21.9 Gastro-oesophageal reflux disease without oesophagitis	K21.9	4651	463010	0.01
ukb-a-546	Diagnoses - main ICD10: K22 Other diseases of oesophagus	K22	3460	337199	0.0103
ukb-b-13731	Diagnoses - main ICD10: K22.1 Ulcer of oesophagus	K22.1	3251	463010	0.007
ukb-d-K25	Diagnoses - main ICD10: K25 Gastric ulcer	K25	1834	361194	0.0051
ukb-b-12202	Diagnoses - secondary ICD10: K25.9 Unspecified as acute or chronic, without haemorrhage or perforation	K25.9	1355	463010	0.0029
ukb-d-K26	Diagnoses - main ICD10: K26 Duodenal ulcer	K26	1291	361194	0.0036
ukb-b-6616	Diagnoses - secondary ICD10: K26.9 Unspecified as acute or chronic, without haemorrhage or perforation	K26.9	1031	463010	0.0022
ukb-a-547	Diagnoses - main ICD10: K29 Gastritis and duodenitis	K29	8080	337199	0.024
ukb-b-12191	Diagnoses - secondary ICD10: K29.5 Chronic gastritis, unspecified	K29.5	1062	463010	0.0023
ukb-b-1306	Diagnoses - main ICD10: K29.6 Other gastritis	K29.6	1830	463010	0.004
ukb-b-15340	Diagnoses - secondary ICD10: K29.7 Gastritis, unspecified	K29.7	5718	463010	0.0123
ukb-b-12316	Diagnoses - main ICD10: K29.8 Duodenitis	K29.8	1800	463010	0.0039
ukb-b-12556	Diagnoses - secondary ICD10: K30 Dyspepsia	K30	2024	463010	0.0044
ukb-d-K31	Diagnoses - main ICD10: K31 Other diseases of stomach and duodenum	K31	2374	361194	0.0066
ukb-b-3027	Diagnoses - secondary ICD10: K31.7 Polyp of stomach and duodenum	K31.7	1233	463010	0.0027
ukb-b-2973	Diagnoses - secondary ICD10: K31.8 Other specified diseases of stomach and duodenum	K31.8	1247	463010	0.0027
ukb-a-548	Diagnoses - main ICD10: K35 Acute appendicitis	K35	1676	337199	0.005
ukb-b-686	Diagnoses - main ICD10: K35.9 Acute appendicitis, unspecified	K35.9	1568	463010	0.0034
ukb-a-549	Diagnoses - main ICD10: K40 Inguinal hernia	K40	8815	337199	0.0261
ukb-b-11369	Diagnoses - main ICD10: K40.2 Bilateral inguinal hernia, without obstruction or gangrene	K40.2	1125	463010	0.0024
ukb-b-5369	Diagnoses - main ICD10: K40.9 Unilateral or unspecified inguinal hernia, without obstruction or gangrene	K40.9	11789	463010	0.0255
ukb-d-K42	Diagnoses - main ICD10: K42 Umbilical hernia	K42	2528	361194	0.007
ukb-b-14541	Diagnoses - main ICD10: K42.9 Umbilical hernia without obstruction or gangrene	K42.9	2315	463010	0.005
ukb-a-550	Diagnoses - main ICD10: K43 Ventral hernia	K43	1536	337199	0.0046
ukb-b-677	Diagnoses - main ICD10: K43.9 Ventral hernia without obstruction or gangrene	K43.9	2188	463010	0.0047
ukb-a-551	Diagnoses - main ICD10: K44 Diaphragmatic hernia	K44	5321	337199	0.0158
ukb-b-3672	Diagnoses - secondary ICD10: K44.9 Diaphragmatic hernia without obstruction or gangrene	K44.9	14326	463010	0.0309
ukb-a-552	Diagnoses - main ICD10: K50 Crohn's disease [regional enteritis]	K50	732	337199	0.0022
ukb-a-553	Diagnoses - main ICD10: K51 Ulcerative colitis	K51	1579	337199	0.0047
ukb-b-19386	Diagnoses - main ICD10: K51.9 Ulcerative colitis, unspecified	K51.9	1987	463010	0.0043
ukb-a-554	Diagnoses - main ICD10: K52 Other non-infective gastro-enteritis and colitis	K52	6453	337199	0.0191
ukb-b-20189	Diagnoses - main ICD10: K52.9 Non-infective gastro-enteritis and colitis, unspecified	K52.9	9463	463010	0.0204
ukb-d-K56	Diagnoses - main ICD10: K56 Paralytic ileus and intestinal obstruction without hernia	K56	1851	361194	0.0051
ukb-b-9797	Diagnoses - main ICD10: K56.6 Other and unspecified intestinal obstruction	K56.6	1006	463010	0.0022
ukb-a-555	Diagnoses - main ICD10: K57 Diverticular disease of intestine	K57	6865	337199	0.0204
ukb-b-10859	Diagnoses - main ICD10: K57.3 Diverticular disease of large intestine without perforation or abscess	K57.3	8429	463010	0.0182
ukb-b-14429	Diagnoses - secondary ICD10: K57.9 Diverticular disease of intestine, part unspecified, without perforation or abscess	K57.9	2622	463010	0.0057
ukb-d-K58	Diagnoses - main ICD10: K58 Irritable bowel syndrome	K58	1121	361194	0.0031
ukb-b-17961	Diagnoses - main ICD10: K58.9 Irritable bowel syndrome without diarrhoea	K58.9	1047	463010	0.0023
ukb-d-K59	Diagnoses - main ICD10: K59 Other functional intestinal disorders	K59	3712	361194	0.0103
ukb-b-18008	Diagnoses - secondary ICD10: K59.0 Constipation	K59.0	3862	463010	0.0083
ukb-a-556	Diagnoses - main ICD10: K60 Fissure and fistula of anal and rectal regions	K60	1578	337199	0.0047
ukb-b-11274	Diagnoses - main ICD10: K60.2 Anal fissure, unspecified	K60.2	1093	463010	0.0024
ukb-b-6721	Diagnoses - main ICD10: K60.3 Anal fistula	K60.3	1003	463010	0.0022
ukb-d-K61	Diagnoses - main ICD10: K61 Abscess of anal and rectal regions	K61	1053	361194	0.0029
ukb-b-5018	Diagnoses - main ICD10: K61.0 Anal abscess	K61.0	1034	463010	0.0022
ukb-a-557	Diagnoses - main ICD10: K62 Other diseases of anus and rectum	K62	9853	337199	0.0292
ukb-b-19805	Diagnoses - main ICD10: K62.1 Rectal polyp	K62.1	2800	463010	0.006
ukb-b-11582	Diagnoses - main ICD10: K62.5 Haemorrhage of anus and rectum	K62.5	9579	463010	0.0207
ukb-b-13464	Diagnoses - main ICD10: K62.8 Other specified diseases of anus and rectum	K62.8	1406	463010	0.003
ukb-d-K63	Diagnoses - main ICD10: K63 Other diseases of intestine	K63	8041	361194	0.0223
ukb-b-17845	Diagnoses - secondary ICD10: K63.5 Polyp of colon	K63.5	2437	463010	0.0053
ukb-b-11675	Diagnoses - secondary ICD10: K66.0 Peritoneal adhesions	K66.0	1457	463010	0.0031
ukb-a-558	Diagnoses - main ICD10: K76 Other diseases of liver	K76	356	337199	0.0011
ukb-a-559	Diagnoses - main ICD10: K80 Cholelithiasis	K80	6986	337199	0.0207
ukb-b-10362	Diagnoses - main ICD10: K80.0 Calculus of gallbladder with acute cholecystitis	K80.0	1100	463010	0.0024
ukb-b-8988	Diagnoses - main ICD10: K80.1 Calculus of gallbladder with other cholecystitis	K80.1	3932	463010	0.0085
ukb-b-11020	Diagnoses - main ICD10: K80.2 Calculus of gallbladder without cholecystitis	K80.2	5766	463010	0.0125
ukb-b-8268	Diagnoses - main ICD10: K80.5 Calculus of bile duct without cholangitis or cholecystitis	K80.5	1706	463010	0.0037
ukb-d-K81	Diagnoses - main ICD10: K81 Cholecystitis	K81	1930	361194	0.0053
ukb-b-19388	Diagnoses - main ICD10: K85 Acute pancreatitis	K85	1215	463010	0.0026
ukb-d-K92	Diagnoses - main ICD10: K92 Other diseases of digestive system	K92	5019	361194	0.0139
ukb-b-1853	Diagnoses - main ICD10: K92.0 Haematemesis	K92.0	1065	463010	0.0023
ukb-b-5590	Diagnoses - main ICD10: K92.1 Melaena	K92.1	1318	463010	0.0028
ukb-b-14999	Diagnoses - main ICD10: K92.2 Gastro-intestinal haemorrhage, unspecified	K92.2	1449	463010	0.0031
ukb-d-L02	Diagnoses - main ICD10: L02 Cutaneous abscess, furuncle and carbuncle	L02	1697	361194	0.0047
ukb-a-560	Diagnoses - main ICD10: L03 Cellulitis	L03	2777	337199	0.0082
ukb-b-11908	Diagnoses - main ICD10: L03.1 Cellulitis of other parts of limb	L03.1	3360	463010	0.0073
ukb-d-L57	Diagnoses - main ICD10: L57 Skin changes due to chronic exposure to nonionising radiation	L57	1447	361194	0.004
ukb-d-L72	Diagnoses - main ICD10: L72 Follicular cysts of skin and subcutaneous tissue	L72	6644	361194	0.0184
ukb-b-15003	Diagnoses - main ICD10: L72.0 Epidermal cyst	L72.0	1863	463010	0.004
ukb-b-14436	Diagnoses - main ICD10: L72.9 Follicular cyst of skin and subcutaneous tissue, unspecified	L72.9	1001	463010	0.0022
ukb-b-501	Diagnoses - main ICD10: L82 Seborrhoeic keratosis	L82	1957	463010	0.0042
ukb-d-L90	Diagnoses - main ICD10: L90 Atrophic disorders of skin	L90	1683	361194	0.0047
ukb-b-11403	Diagnoses - main ICD10: L90.5 Scar conditions and fibrosis of skin	L90.5	1464	463010	0.0032
ukb-d-L98	Diagnoses - main ICD10: L98 Other disorders of skin and subcutaneous tissue, not elsewhere classified	L98	4035	361194	0.0112
ukb-b-20190	Diagnoses - main ICD10: L98.9 Disorder of skin and subcutaneous tissue, unspecified	L98.9	3223	463010	0.007
ukb-d-M06	Diagnoses - main ICD10: M06 Other rheumatoid arthritis	M06	1401	361194	0.0039
ukb-b-11874	Diagnoses - secondary ICD10: M06.99 Rheumatoid arthritis, unspecified (Site unspecified)	M06.99	1523	463010	0.0033
ukb-a-561	Diagnoses - main ICD10: M10 Gout	M10	181	337199	0.0005
ukb-b-12765	Diagnoses - secondary ICD10: M10.99 Gout, unspecified (Site unspecified)	M10.99	1042	463010	0.0023
ukb-d-M13	Diagnoses - main ICD10: M13 Other arthritis	M13	1110	361194	0.0031
ukb-b-11045	Diagnoses - secondary ICD10: M13.9 Arthritis, unspecified	M13.9	1477	463010	0.0032
ukb-b-15026	Diagnoses - secondary ICD10: M13.99 Arthritis, unspecified (Site unspecified)	M13.99	2785	463010	0.006
ukb-d-M15	Diagnoses - main ICD10: M15 Polyarthrosis	M15	1264	361194	0.0035
ukb-b-6998	Diagnoses - secondary ICD10: M15.9 Polyarthrosis, unspecified	M15.9	1165	463010	0.0025
ukb-a-562	Diagnoses - main ICD10: M16 Coxarthrosis [arthrosis of hip]	M16	4934	337199	0.0146
ukb-b-2875	Diagnoses - main ICD10: M16.1 Other primary coxarthrosis	M16.1	2876	463010	0.0062
ukb-b-19829	Diagnoses - main ICD10: M16.9 Coxarthrosis, unspecified	M16.9	4255	463010	0.0092
ukb-a-563	Diagnoses - main ICD10: M17 Gonarthrosis [arthrosis of knee]	M17	6560	337199	0.0195
ukb-b-12964	Diagnoses - secondary ICD10: M17.1 Other primary gonarthrosis	M17.1	1492	463010	0.0032
ukb-b-18379	Diagnoses - main ICD10: M17.9 Gonarthrosis, unspecified	M17.9	6497	463010	0.014
ukb-d-M19	Diagnoses - main ICD10: M19 Other arthrosis	M19	4165	361194	0.0115
ukb-b-9493	Diagnoses - secondary ICD10: M19.9 Arthrosis, unspecified	M19.9	1797	463010	0.0039
ukb-b-20233	Diagnoses - secondary ICD10: M19.99 Arthrosis, unspecified (Site unspecified)	M19.99	2905	463010	0.0063
ukb-a-564	Diagnoses - main ICD10: M20 Acquired deformities of fingers and toes	M20	5148	337199	0.0153
ukb-b-6026	Diagnoses - main ICD10: M20.1 Hallux valgus (acquired)	M20.1	5304	463010	0.0115
ukb-b-4280	Diagnoses - main ICD10: M20.2 Hallux rigidus	M20.2	1083	463010	0.0023
ukb-a-565	Diagnoses - main ICD10: M21 Other acquired deformities of limbs	M21	379	337199	0.0011
ukb-a-566	Diagnoses - main ICD10: M23 Internal derangement of knee	M23	7489	337199	0.0222
ukb-b-8213	Diagnoses - main ICD10: M23.2 Derangement of meniscus due to old tear or injury	M23.2	1433	463010	0.0031
ukb-b-9694	Diagnoses - main ICD10: M23.22 Derangement of meniscus due to old tear or injury (Posterior cruciate ligament or Poste	M23.22	1958	463010	0.0042
ukb-b-7118	Diagnoses - main ICD10: M23.23 Derangement of meniscus due to old tear or injury (Medial collateral ligament or Other	M23.23	2596	463010	0.0056
ukb-a-567	Diagnoses - main ICD10: M24 Other specific joint derangements	M24	838	337199	0.0025
ukb-a-568	Diagnoses - main ICD10: M25 Other joint disorders not elsewhere classified	M25	4908	337199	0.0146
ukb-b-13019	Diagnoses - main ICD10: M25.5 Pain in joint	M25.5	1451	463010	0.0031
ukb-b-2083	Diagnoses - main ICD10: M25.56 Pain in joint (Lower leg)	M25.56	1624	463010	0.0035
ukb-d-M47	Diagnoses - main ICD10: M47 Spondylosis	M47	2004	361194	0.0055
ukb-b-2625	Diagnoses - secondary ICD10: M47.82 Other spondylosis (Cervical region)	M47.82	1018	463010	0.0022
ukb-d-M48	Diagnoses - main ICD10: M48 Other spondylopathies	M48	1890	361194	0.0052
ukb-d-M51	Diagnoses - main ICD10: M51 Other intervertebral disk disorders	M51	4690	361194	0.013
ukb-b-18279	Diagnoses - main ICD10: M51.1 Lumbar and other intervertebral disk disorders with radiculopathy	M51.1	2214	463010	0.0048
ukb-b-12872	Diagnoses - main ICD10: M51.2 Other specified intervertebral disk displacement	M51.2	1433	463010	0.0031
ukb-b-19807	Diagnoses - main ICD10: M51.3 Other specified intervertebral disk degeneration	M51.3	1045	463010	0.0023
ukb-a-569	Diagnoses - main ICD10: M54 Dorsalgia	M54	5660	337199	0.0168
ukb-b-1557	Diagnoses - main ICD10: M54.5 Low back pain	M54.5	2439	463010	0.0053
ukb-b-19813	Diagnoses - main ICD10: M54.56 Low back pain (Lumbar region)	M54.56	1423	463010	0.0031
ukb-b-10873	Diagnoses - main ICD10: M54.59 Low back pain (Site unspecified)	M54.59	1446	463010	0.0031
ukb-d-M65	Diagnoses - main ICD10: M65 Synovitis and tenosynovitis	M65	2812	361194	0.0078
ukb-b-8085	Diagnoses - main ICD10: M65.3 Trigger finger	M65.3	1059	463010	0.0023
ukb-a-570	Diagnoses - main ICD10: M67 Other disorders of synovium and tendon	M67	1787	337199	0.0053
ukb-b-12364	Diagnoses - main ICD10: M67.4 Ganglion	M67.4	2172	463010	0.0047
ukb-a-571	Diagnoses - main ICD10: M70 Soft tissue disorders related to use overuse and pressure	M70	673	337199	0.002
ukb-a-572	Diagnoses - main ICD10: M72 Fibroblastic disorders	M72	1862	337199	0.0055
ukb-b-13517	Diagnoses - main ICD10: M72.0 Palmar fascial fibromatosis [Dupuytren]	M72.0	1366	463010	0.003
ukb-b-4772	Diagnoses - main ICD10: M72.04 Palmar fascial fibromatosis [Dupuytren]-Hand	M72.04	1537	463010	0.0033
ukb-d-M75	Diagnoses - main ICD10: M75 Shoulder lesions	M75	7040	361194	0.0195
ukb-b-4921	Diagnoses - main ICD10: M75.0 Adhesive capsulitis of shoulder	M75.0	1083	463010	0.0023
ukb-b-50	Diagnoses - main ICD10: M75.1 Rotator cuff syndrome	M75.1	1767	463010	0.0038
ukb-b-1418	Diagnoses - main ICD10: M75.4 Impingement syndrome of shoulder	M75.4	2901	463010	0.0063
ukb-d-M79	Diagnoses - main ICD10: M79 Other soft tissue disorders, not elsewhere classified	M79	6946	361194	0.0192
ukb-b-9708	Diagnoses - main ICD10: M79.66 Pain in limb (Lower leg)	M79.66	1689	463010	0.0036
ukb-b-12620	Diagnoses - main ICD10: M79.86 Other specified soft tissue disorders (Lower leg)	M79.86	1592	463010	0.0034
ukb-b-17796	Diagnoses - secondary ICD10: M81.99 Osteoporosis, unspecified (Site unspecified)	M81.99	1976	463010	0.0043
ukb-d-M84	Diagnoses - main ICD10: M84 Disorders of continuity of bone	M84	1065	361194	0.0029
ukb-d-N13	Diagnoses - main ICD10: N13 Obstructive and reflux uropathy	N13	1359	361194	0.0038
ukb-b-4963	Diagnoses - secondary ICD10: N17.9 Acute renal failure, unspecified	N17.9	1415	463010	0.0031
ukb-a-573	Diagnoses - main ICD10: N19 Unspecified renal failure	N19	126	337199	0.0004
ukb-a-574	Diagnoses - main ICD10: N20 Calculus of kidney and ureter	N20	2427	337199	0.0072
ukb-b-18372	Diagnoses - main ICD10: N20.0 Calculus of kidney	N20.0	2186	463010	0.0047
ukb-b-18629	Diagnoses - main ICD10: N20.1 Calculus of ureter	N20.1	1979	463010	0.0043
ukb-b-16313	Diagnoses - main ICD10: N23 Unspecified renal colic	N23	1675	463010	0.0036
ukb-d-N30	Diagnoses - main ICD10: N30 Cystitis	N30	1575	361194	0.0044
ukb-d-N31	Diagnoses - main ICD10: N31 Neuromuscular dysfunction of bladder, not elsewhere classified	N31	1014	361194	0.0028
ukb-a-575	Diagnoses - main ICD10: N32 Other disorders of bladder	N32	2749	337199	0.0082
ukb-b-123	Diagnoses - main ICD10: N32.0 Bladder-neck obstruction	N32.0	1385	463010	0.003
ukb-b-373	Diagnoses - main ICD10: N32.8 Other specified disorders of bladder	N32.8	2225	463010	0.0048
ukb-d-N35	Diagnoses - main ICD10: N35 Urethral stricture	N35	2037	361194	0.0056
ukb-b-9074	Diagnoses - main ICD10: N35.9 Urethral stricture, unspecified	N35.9	2013	463010	0.0043
ukb-d-N39	Diagnoses - main ICD10: N39 Other disorders of urinary system	N39	10551	361194	0.0292
ukb-b-6077	Diagnoses - secondary ICD10: N39.0 Urinary tract infection, site not specified	N39.0	4180	463010	0.009
ukb-b-5266	Diagnoses - secondary ICD10: N39.3 Stress incontinence	N39.3	1404	463010	0.003
ukb-a-576	Diagnoses - main ICD10: N40 Hyperplasia of prostate	N40	3140	337199	0.0093
ukb-b-10668	Diagnoses - main ICD10: N47 Redundant prepuce, phimosis and paraphimosis	N47	1541	463010	0.0033
ukb-d-N48	Diagnoses - main ICD10: N48 Other disorders of penis	N48	1317	361194	0.0036
ukb-d-N50	Diagnoses - main ICD10: N50 Other disorders of male genital organs	N50	1829	361194	0.0051
ukb-b-3802	Diagnoses - main ICD10: N50.8 Other specified disorders of male genital organs	N50.8	1408	463010	0.003
ukb-d-N60	Diagnoses - main ICD10: N60 Benign mammary dysplasia	N60	1157	361194	0.0032
ukb-b-7428	Diagnoses - main ICD10: N63 Unspecified lump in breast	N63	1481	463010	0.0032
ukb-b-6413	Diagnoses - secondary ICD10: N73.6 Female pelvic peritoneal adhesions	N73.6	1790	463010	0.0039
ukb-d-N80	Diagnoses - main ICD10: N80 Endometriosis	N80	1496	361194	0.0041
ukb-b-9668	Diagnoses - secondary ICD10: N80.0 Endometriosis of uterus	N80.0	1121	463010	0.0024
ukb-a-577	Diagnoses - main ICD10: N81 Female genital prolapse	N81	4840	337199	0.0144
ukb-b-11298	Diagnoses - main ICD10: N81.1 Cystocele	N81.1	2554	463010	0.0055
ukb-b-2055	Diagnoses - secondary ICD10: N81.2 Incomplete uterovaginal prolapse	N81.2	1042	463010	0.0023
ukb-b-3412	Diagnoses - secondary ICD10: N81.6 Rectocele	N81.6	2093	463010	0.0045
ukb-d-N83	Diagnoses - main ICD10: N83 Noninflammatory disorders of ovary, Fallopian tube and broad ligament	N83	2215	361194	0.0061
ukb-b-4790	Diagnoses - secondary ICD10: N83.2 Other and unspecified ovarian cysts	N83.2	1656	463010	0.0036
ukb-d-N84	Diagnoses - main ICD10: N84 Polyp of female genital tract	N84	6986	361194	0.0193
ukb-b-12944	Diagnoses - main ICD10: N84.0 Polyp of corpus uteri	N84.0	5419	463010	0.0117
ukb-b-19110	Diagnoses - main ICD10: N84.1 Polyp of cervix uteri	N84.1	2307	463010	0.005
ukb-d-N85	Diagnoses - main ICD10: N85 Other noninflammatory disorders of uterus, except cervix	N85	1489	361194	0.0041
ukb-b-8685	Diagnoses - secondary ICD10: N85.8 Other specified noninflammatory disorders of uterus	N85.8	1450	463010	0.0031
ukb-d-N87	Diagnoses - main ICD10: N87 Dysplasia of cervix uteri	N87	1102	361194	0.0031
ukb-d-N90	Diagnoses - main ICD10: N90 Other noninflammatory disorders of vulva and perineum	N90	1077	361194	0.003
ukb-a-578	Diagnoses - main ICD10: N92 Excessive frequent and irregular menstruation	N92	6882	337199	0.0204
ukb-b-11572	Diagnoses - main ICD10: N92.0 Excessive and frequent menstruation with regular cycle	N92.0	6641	463010	0.0143
ukb-b-9591	Diagnoses - main ICD10: N92.1 Excessive and frequent menstruation with irregular cycle	N92.1	2048	463010	0.0044
ukb-b-14674	Diagnoses - main ICD10: N92.6 Irregular menstruation, unspecified	N92.6	1279	463010	0.0028
ukb-d-N93	Diagnoses - main ICD10: N93 Other abnormal uterine and vaginal bleeding	N93	2455	361194	0.0068
ukb-b-14086	Diagnoses - main ICD10: N93.8 Other specified abnormal uterine and vaginal bleeding	N93.8	1392	463010	0.003
ukb-b-10849	Diagnoses - main ICD10: N93.9 Abnormal uterine and vaginal bleeding, unspecified	N93.9	1145	463010	0.0025
ukb-d-N94	Diagnoses - main ICD10: N94 Pain and other conditions associated with female genital organs and menstrual cycle	N94	1295	361194	0.0036
ukb-b-12604	Diagnoses - secondary ICD10: N94.6 Dysmenorrhoea, unspecified	N94.6	1145	463010	0.0025
ukb-d-N95	Diagnoses - main ICD10: N95 Menopausal and other perimenopausal disorders	N95	6496	361194	0.018
ukb-b-16879	Diagnoses - secondary ICD10: N95.0 Postmenopausal bleeding	N95.0	2161	463010	0.0047
ukb-d-O02	Diagnoses - main ICD10: O02 Other abnormal products of conception	O02	1106	361194	0.0031
ukb-b-13414	Diagnoses - main ICD10: O02.1 Missed abortion	O02.1	1317	463010	0.0028
ukb-d-O03	Diagnoses - main ICD10: O03 Spontaneous abortion	O03	1150	361194	0.0032
ukb-b-13696	Diagnoses - main ICD10: O04.9 Complete or unspecified, without complication	O04.9	1068	463010	0.0023
ukb-d-O26	Diagnoses - main ICD10: O26 Maternal care for other conditions predominantly related to pregnancy	O26	1289	361194	0.0036
ukb-b-9712	Diagnoses - main ICD10: O26.8 Other specified pregnancy-related conditions	O26.8	1302	463010	0.0028
ukb-d-O36	Diagnoses - main ICD10: O36 Maternal care for other known or suspected foetal problems	O36	1149	361194	0.0032
ukb-d-O63	Diagnoses - main ICD10: O63 Long labour	O63	1060	361194	0.0029
ukb-b-2194	Diagnoses - main ICD10: O63.1 Prolonged second stage (of labour)	O63.1	1027	463010	0.0022
ukb-d-O68	Diagnoses - main ICD10: O68 Labour and delivery complicated by foetal stress [distress]	O68	1882	361194	0.0052
ukb-b-9270	Diagnoses - main ICD10: O68.0 Labour and delivery complicated by foetal heart rate anomaly	O68.0	1009	463010	0.0022
ukb-d-O70	Diagnoses - main ICD10: O70 Perineal laceration during delivery	O70	3077	361194	0.0085
ukb-b-9597	Diagnoses - main ICD10: O70.0 First degree perineal laceration during delivery	O70.0	1620	463010	0.0035
ukb-b-10712	Diagnoses - main ICD10: O70.1 Second degree perineal laceration during delivery	O70.1	2469	463010	0.0053
ukb-a-579	Diagnoses - main ICD10: O75 Other complications of labour and delivery not elsewhere classified	O75	181	337199	0.0005
ukb-d-O80	Diagnoses - main ICD10: O80 Single spontaneous delivery	O80	1672	361194	0.0046
ukb-b-6330	Diagnoses - main ICD10: O80.0 Spontaneous vertex delivery	O80.0	1726	463010	0.0037
ukb-d-R00	Diagnoses - main ICD10: R00 Abnormalities of heart beat	R00	2542	361194	0.007
ukb-b-17309	Diagnoses - secondary ICD10: R00.0 Tachycardia, unspecified	R00.0	1005	463010	0.0022
ukb-b-11664	Diagnoses - secondary ICD10: R00.1 Bradycardia, unspecified	R00.1	1254	463010	0.0027
ukb-b-1480	Diagnoses - secondary ICD10: R00.2 Palpitations	R00.2	1380	463010	0.003
ukb-b-16587	Diagnoses - secondary ICD10: R03.0 Elevated blood-pressure reading, without diagnosis of hypertension	R03.0	1134	463010	0.0024
ukb-a-580	Diagnoses - main ICD10: R04 Haemorrhage from respiratory passages	R04	1788	337199	0.0053
ukb-b-11412	Diagnoses - main ICD10: R04.0 Epistaxis	R04.0	1512	463010	0.0033
ukb-b-4507	Diagnoses - main ICD10: R04.2 Haemoptysis	R04.2	1240	463010	0.0027
ukb-b-20009	Diagnoses - secondary ICD10: R05 Cough	R05	1072	463010	0.0023
ukb-d-R06	Diagnoses - main ICD10: R06 Abnormalities of breathing	R06	4126	361194	0.0114
ukb-b-19391	Diagnoses - secondary ICD10: R06.0 Dyspnoea	R06.0	2248	463010	0.0049
ukb-b-19769	Diagnoses - main ICD10: R06.5 Mouth breathing	R06.5	1536	463010	0.0033
ukb-a-581	Diagnoses - main ICD10: R07 Pain in throat and chest	R07	16552	337199	0.0491
ukb-b-20386	Diagnoses - main ICD10: R07.2 Precordial pain	R07.2	2140	463010	0.0046
ukb-b-14603	Diagnoses - main ICD10: R07.3 Other chest pain	R07.3	7146	463010	0.0154
ukb-b-10771	Diagnoses - main ICD10: R07.4 Chest pain, unspecified	R07.4	18203	463010	0.0393
ukb-a-582	Diagnoses - main ICD10: R10 Abdominal and pelvic pain	R10	14203	337199	0.0421
ukb-b-10409	Diagnoses - secondary ICD10: R10.1 Pain localised to upper abdomen	R10.1	1543	463010	0.0033
ukb-b-17456	Diagnoses - main ICD10: R10.3 Pain localised to other parts of lower abdomen	R10.3	4823	463010	0.0104
ukb-b-19409	Diagnoses - secondary ICD10: R10.4 Other and unspecified abdominal pain	R10.4	4649	463010	0.01
ukb-a-583	Diagnoses - main ICD10: R11 Nausea and vomiting	R11	1365	337199	0.004
ukb-b-7073	Diagnoses - main ICD10: R13 Dysphagia	R13	3012	463010	0.0065
ukb-a-584	Diagnoses - main ICD10: R14 Flatulence and related conditions	R14	201	337199	0.0006
ukb-d-R19	Diagnoses - main ICD10: R19 Other symptoms and signs involving the digestive system and abdomen	R19	8796	361194	0.0244
ukb-b-10368	Diagnoses - secondary ICD10: R19.4 Change in bowel habit	R19.4	2443	463010	0.0053
ukb-d-R22	Diagnoses - main ICD10: R22 Localised swelling, mass and lump of skin and subcutaneous tissue	R22	1358	361194	0.0038
ukb-a-585	Diagnoses - main ICD10: R31 Unspecified haematuria	R31	7363	337199	0.0218
ukb-b-11531	Diagnoses - main ICD10: R32 Unspecified urinary incontinence	R32	1011	463010	0.0022
ukb-b-19207	Diagnoses - secondary ICD10: R33 Retention of urine	R33	2599	463010	0.0056
ukb-a-586	Diagnoses - main ICD10: R35 Polyuria	R35	1349	337199	0.004
ukb-d-R39	Diagnoses - main ICD10: R39 Other symptoms and signs involving the urinary system	R39	2698	361194	0.0075
ukb-b-17287	Diagnoses - main ICD10: R39.8 Other and unspecified symptoms and signs involving the urinary system	R39.8	1943	463010	0.0042
ukb-b-20542	Diagnoses - secondary ICD10: R42 Dizziness and giddiness	R42	1756	463010	0.0038
ukb-d-R50	Diagnoses - main ICD10: R50 Fever of unknown origin	R50	1156	361194	0.0032
ukb-b-19086	Diagnoses - secondary ICD10: R50.9 Fever, unspecified	R50.9	1794	463010	0.0039
ukb-b-1977	Diagnoses - main ICD10: R51 Headache	R51	4293	463010	0.0093
ukb-b-11972	Diagnoses - secondary ICD10: R53 Malaise and fatigue	R53	1245	463010	0.0027
ukb-a-587	Diagnoses - main ICD10: R55 Syncope and collapse	R55	3057	337199	0.0091
ukb-d-R56	Diagnoses - main ICD10: R56 Convulsions, not elsewhere classified	R56	1077	361194	0.003
ukb-d-R59	Diagnoses - main ICD10: R59 Enlarged lymph nodes	R59	1011	361194	0.0028
ukb-d-R63	Diagnoses - main ICD10: R63 Symptoms and signs concerning food and fluid intake	R63	1279	361194	0.0035
ukb-b-13845	Diagnoses - secondary ICD10: R63.4 Abnormal weight loss	R63.4	2751	463010	0.0059
ukb-a-588	Diagnoses - main ICD10: R69 Unknown and unspecified causes of morbidity	R69	6717	337199	0.0199
ukb-d-R79	Diagnoses - main ICD10: R79 Other abnormal findings of blood chemistry	R79	2622	361194	0.0073
ukb-b-11052	Diagnoses - main ICD10: R79.8 Other specified abnormal findings of blood chemistry	R79.8	1972	463010	0.0043
ukb-d-R87	Diagnoses - main ICD10: R87 Abnormal findings in specimens from female genital organs	R87	1084	361194	0.003
ukb-b-15836	Diagnoses - main ICD10: R87.6 Abnormal cytological findings	R87.6	1283	463010	0.0028
ukb-d-R93	Diagnoses - main ICD10: R93 Abnormal findings on diagnostic imaging of other body structures	R93	1217	361194	0.0034
ukb-b-4579	Diagnoses - secondary ICD10: R94.5 Abnormal results of liver function studies	R94.5	1802	463010	0.0039
ukb-d-S01	Diagnoses - main ICD10: S01 Open wound of head	S01	1694	361194	0.0047
ukb-d-S02	Diagnoses - main ICD10: S02 Fracture of skull and facial bones	S02	1351	361194	0.0037
ukb-a-589	Diagnoses - main ICD10: S09 Other and unspecified injuries of head	S09	932	337199	0.0028
ukb-b-16917	Diagnoses - main ICD10: S09.9 Unspecified injury of head	S09.9	1394	463010	0.003
ukb-d-S42	Diagnoses - main ICD10: S42 Fracture of shoulder and upper arm	S42	1791	361194	0.005
ukb-a-590	Diagnoses - main ICD10: S52 Fracture of forearm	S52	3284	337199	0.0097
ukb-b-2804	Diagnoses - main ICD10: S52.50 Fracture of lower end of radius (closed)	S52.50	2696	463010	0.0058
ukb-d-S61	Diagnoses - main ICD10: S61 Open wound of wrist and hand	S61	1865	361194	0.0052
ukb-d-S62	Diagnoses - main ICD10: S62 Fracture at wrist and hand level	S62	1763	361194	0.0049
ukb-a-591	Diagnoses - main ICD10: S66 Injury of muscle and tendon at wrist and hand level	S66	553	337199	0.0016
ukb-d-S72	Diagnoses - main ICD10: S72 Fracture of femur	S72	1803	361194	0.005
ukb-a-592	Diagnoses - main ICD10: S76 Injury of muscle and tendon at hip and thigh level	S76	154	337199	0.0005
ukb-d-S82	Diagnoses - main ICD10: S82 Fracture of lower leg, including ankle	S82	4557	361194	0.0126
ukb-b-5946	Diagnoses - main ICD10: S82.80 Fractures of other parts of lower leg (closed)	S82.80	1479	463010	0.0032
ukb-d-T39	Diagnoses - main ICD10: T39 Poisoning by nonopioid analgesics, antipyretics and antirheumatics	T39	1161	361194	0.0032
ukb-b-12187	Diagnoses - main ICD10: T39.1 4-Aminophenol derivatives	T39.1	1014	463010	0.0022
ukb-d-T81	Diagnoses - main ICD10: T81 Complications of procedures, not elsewhere classified	T81	5550	361194	0.0154
ukb-b-17587	Diagnoses - main ICD10: T81.0 Haemorrhage and haematoma complicating a procedure, not elsewhere classified	T81.0	1896	463010	0.0041
ukb-b-4586	Diagnoses - secondary ICD10: T81.4 Infection following a procedure, not elsewhere classified	T81.4	1506	463010	0.0033
ukb-d-T82	Diagnoses - main ICD10: T82 Complications of cardiac and vascular prosthetic devices, implants and grafts	T82	1133	361194	0.0031
ukb-a-593	Diagnoses - main ICD10: T84 Complications of internal orthopaedic prosthetic devices implants and grafts	T84	2053	337199	0.0061
ukb-b-14753	Diagnoses - main ICD10: T84.0 Mechanical complication of internal joint prosthesis	T84.0	1178	463010	0.0025
ukb-b-11680	Diagnoses - main ICD10: T84.8 Other complications of internal orthopaedic prosthetic devices, implants and grafts	T84.8	1027	463010	0.0022
ukb-d-T85	Diagnoses - main ICD10: T85 Complications of other internal prosthetic devices, implants and grafts	T85	1501	361194	0.0042
ukb-b-11065	Diagnoses - secondary ICD10: W01.0 Home	W01.0	1122	463010	0.0024
ukb-b-12058	Diagnoses - secondary ICD10: W01.9 Unspecified place	W01.9	1345	463010	0.0029
ukb-b-19088	Diagnoses - secondary ICD10: W10.0 Home	W10.0	1120	463010	0.0024
ukb-b-2854	Diagnoses - secondary ICD10: W19.9 Unspecified place	W19.9	2506	463010	0.0054
ukb-b-14257	Diagnoses - secondary ICD10: X59.9 Unspecified place	X59.9	3232	463010	0.007
ukb-b-4745	Diagnoses - secondary ICD10: Y43.3 Other antineoplastic drugs	Y43.3	1101	463010	0.0024
ukb-b-13841	Diagnoses - secondary ICD10: Y83.1 Surgical operation with implant of artificial internal device	Y83.1	4135	463010	0.0089
ukb-b-3115	Diagnoses - secondary ICD10: Y83.2 Surgical operation with anastomosis, bypass or graft	Y83.2	1411	463010	0.003
ukb-b-7702	Diagnoses - secondary ICD10: Y83.6 Removal of other organ (partial) (total)	Y83.6	3054	463010	0.0066
ukb-b-17823	Diagnoses - secondary ICD10: Y83.8 Other surgical procedures	Y83.8	4789	463010	0.0103
ukb-d-Z01	Diagnoses - main ICD10: Z01 Other special examinations and investigations of persons without complaint or reported dia	Z01	1370	361194	0.0038
ukb-d-Z03	Diagnoses - main ICD10: Z03 Medical observation and evaluation for suspected diseases and conditions	Z03	4951	361194	0.0137
ukb-b-6295	Diagnoses - secondary ICD10: Z03.4 Observation for suspected myocardial infarction	Z03.4	2559	463010	0.0055
ukb-b-10490	Diagnoses - secondary ICD10: Z03.8 Observation for other suspected diseases and conditions	Z03.8	2219	463010	0.0048
ukb-d-Z08	Diagnoses - main ICD10: Z08 Follow-up examination after treatment for malignant neoplasm	Z08	4214	361194	0.0117
ukb-b-1261	Diagnoses - main ICD10: Z08.0 Follow-up examination after surgery for malignant neoplasm	Z08.0	3005	463010	0.0065
ukb-a-594	Diagnoses - main ICD10: Z09 Follow-up examination after treatment for conditions other than malignant neoplasms	Z09	5162	337199	0.0153
ukb-b-10102	Diagnoses - main ICD10: Z09.0 Follow-up examination after surgery for other conditions	Z09.0	3424	463010	0.0074
ukb-b-14479	Diagnoses - main ICD10: Z09.8 Follow-up examination after other treatment for other conditions	Z09.8	2243	463010	0.0048
ukb-b-10646	Diagnoses - main ICD10: Z09.9 Follow-up examination after unspecified treatment for other conditions	Z09.9	1942	463010	0.0042
ukb-d-Z12	Diagnoses - main ICD10: Z12 Special screening examination for neoplasms	Z12	4152	361194	0.0115
ukb-b-203	Diagnoses - main ICD10: Z12.1 Special screening examination for neoplasm of intestinal tract	Z12.1	3103	463010	0.0067
ukb-d-Z13	Diagnoses - main ICD10: Z13 Special screening examination for other diseases and disorders	Z13	2236	361194	0.0062
ukb-b-5443	Diagnoses - secondary ICD10: Z13.0 Special screening examination for diseases of the blood and blood-forming organs a	Z13.0	1060	463010	0.0023
ukb-b-20038	Diagnoses - main ICD10: Z13.8 Special screening examination for other specified diseases and disorders	Z13.8	1246	463010	0.0027
ukb-d-Z30	Diagnoses - main ICD10: Z30 Contraceptive management	Z30	6392	361194	0.0177
ukb-b-7418	Diagnoses - main ICD10: Z30.2 Sterilisation	Z30.2	7023	463010	0.0152
ukb-b-4193	Diagnoses - secondary ICD10: Z37.0 Single live birth	Z37.0	12567	463010	0.0271
ukb-d-Z42	Diagnoses - main ICD10: Z42 Follow-up care involving plastic surgery	Z42	1963	361194	0.0054
ukb-b-18897	Diagnoses - main ICD10: Z42.1 Follow-up care involving plastic surgery of breast	Z42.1	1522	463010	0.0033
ukb-d-Z43	Diagnoses - main ICD10: Z43 Attention to artificial openings	Z43	1356	361194	0.0038
ukb-d-Z45	Diagnoses - main ICD10: Z45 Adjustment and management of implanted device	Z45	2209	361194	0.0061
ukb-d-Z46	Diagnoses - main ICD10: Z46 Fitting and adjustment of other devices	Z46	3614	361194	0.01
ukb-b-7463	Diagnoses - main ICD10: Z46.6 Fitting and adjustment of urinary device	Z46.6	2729	463010	0.0059
ukb-a-595	Diagnoses - main ICD10: Z47 Other orthopaedic follow-up care	Z47	1954	337199	0.0058
ukb-b-19542	Diagnoses - main ICD10: Z47.0 Follow-up care involving removal of fracture plate and other internal fixation device	Z47.0	2730	463010	0.0059
ukb-b-10061	Diagnoses - secondary ICD10: Z50.1 Other physical therapy	Z50.1	1824	463010	0.0039
ukb-b-16024	Diagnoses - secondary ICD10: Z51.0 Radiotherapy session	Z51.0	1942	463010	0.0042
ukb-b-11484	Diagnoses - secondary ICD10: Z51.1 Chemotherapy session for neoplasm	Z51.1	7714	463010	0.0167
ukb-b-712	Diagnoses - secondary ICD10: Z51.2 Other chemotherapy	Z51.2	3035	463010	0.0066
ukb-b-15983	Diagnoses - secondary ICD10: Z51.5 Palliative care	Z51.5	1231	463010	0.0027
ukb-d-Z53	Diagnoses - main ICD10: Z53 Persons encountering health services for specifie procedures, not carried out	Z53	1754	361194	0.0049
ukb-b-9019	Diagnoses - secondary ICD10: Z53.0 Procedure not carried out because of contraindication	Z53.0	4779	463010	0.0103
ukb-b-5045	Diagnoses - secondary ICD10: Z53.2 Procedure not carried out because of patient's decision for other and unspecified rea	Z53.2	1283	463010	0.0028
ukb-b-9043	Diagnoses - secondary ICD10: Z53.8 Procedure not carried out for other reasons	Z53.8	10952	463010	0.0237
ukb-b-9216	Diagnoses - secondary ICD10: Z53.9 Procedure not carried out, unspecified reason	Z53.9	1877	463010	0.0041
ukb-b-2895	Diagnoses - secondary ICD10: Z60.2 Living alone	Z60.2	3497	463010	0.0076
ukb-b-5115	Diagnoses - secondary ICD10: Z72.0 Tobacco use	Z72.0	13421	463010	0.029
ukb-b-391	Diagnoses - secondary ICD10: Z72.1 Alcohol use	Z72.1	3685	463010	0.008
ukb-a-596	Diagnoses - main ICD10: Z80 Family history of malignant neoplasm	Z80	326	337199	0.001
ukb-b-13247	Diagnoses - secondary ICD10: Z80.0 Family history of malignant neoplasm of digestive organs	Z80.0	5989	463010	0.0129
ukb-b-7643	Diagnoses - secondary ICD10: Z80.3 Family history of malignant neoplasm of breast	Z80.3	1091	463010	0.0024
ukb-b-2205	Diagnoses - secondary ICD10: Z82.4 Family history of ischaemic heart disease and other diseases of the circulatory system	Z82.4	9330	463010	0.0202
ukb-b-16471	Diagnoses - secondary ICD10: Z85.0 Personal history of malignant neoplasm of digestive organs	Z85.0	3570	463010	0.0077
ukb-b-20142	Diagnoses - secondary ICD10: Z85.3 Personal history of malignant neoplasm of breast	Z85.3	5208	463010	0.0112
ukb-b-11709	Diagnoses - secondary ICD10: Z85.4 Personal history of malignant neoplasm of genital organs	Z85.4	2692	463010	0.0058
ukb-b-7299	Diagnoses - secondary ICD10: Z85.5 Personal history of malignant neoplasm of urinary tract	Z85.5	2117	463010	0.0046
ukb-b-11231	Diagnoses - secondary ICD10: Z85.8 Personal history of malignant neoplasms of other organs and systems	Z85.8	3509	463010	0.0076
ukb-b-3897	Diagnoses - secondary ICD10: Z86.0 Personal history of other neoplasms	Z86.0	4011	463010	0.0087
ukb-b-19864	Diagnoses - secondary ICD10: Z86.1 Personal history of infectious and parasitic diseases	Z86.1	1375	463010	0.003
ukb-b-1585	Diagnoses - secondary ICD10: Z86.4 Personal history of psychoactive substance abuse	Z86.4	11793	463010	0.0255
ukb-b-546	Diagnoses - secondary ICD10: Z86.6 Personal history of diseases of the nervous system and sense organs	Z86.6	3119	463010	0.0067
ukb-b-13782	Diagnoses - secondary ICD10: Z86.7 Personal history of diseases of the circulatory system	Z86.7	10173	463010	0.022
ukb-b-16364	Diagnoses - secondary ICD10: Z87.1 Personal history of diseases of the digestive system	Z87.1	10458	463010	0.0226
ukb-b-18023	Diagnoses - secondary ICD10: Z87.3 Personal history of diseases of the musculoskeletal system and connective tissue	Z87.3	1285	463010	0.0028
ukb-b-10880	Diagnoses - secondary ICD10: Z87.4 Personal history of diseases of the genito-urinary system	Z87.4	4538	463010	0.0098
ukb-b-5911	Diagnoses - secondary ICD10: Z88.0 Personal history of allergy to penicillin	Z88.0	11348	463010	0.0245
ukb-b-9841	Diagnoses - secondary ICD10: Z88.1 Personal history of allergy to other antibiotic agents	Z88.1	2150	463010	0.0046
ukb-b-4267	Diagnoses - secondary ICD10: Z88.6 Personal history of allergy to analgesic agent	Z88.6	2685	463010	0.0058
ukb-b-4601	Diagnoses - secondary ICD10: Z88.8 Personal history of allergy to other drugs, medicaments and biological substances	Z88.8	2694	463010	0.0058
ukb-b-16641	Diagnoses - secondary ICD10: Z90.1 Acquired absence of breast(s)	Z90.1	1661	463010	0.0036
ukb-b-14829	Diagnoses - secondary ICD10: Z90.4 Acquired absence of other parts of digestive tract	Z90.4	3438	463010	0.0074
ukb-b-20424	Diagnoses - secondary ICD10: Z90.7 Acquired absence of genital organ(s)	Z90.7	3446	463010	0.0074
ukb-b-16702	Diagnoses - secondary ICD10: Z91.0 Personal history of allergy, other than to drugs and biological substances	Z91.0	1658	463010	0.0036
ukb-b-7352	Diagnoses - secondary ICD10: Z92.1 Personal history of long-term (current) use of anticoagulants	Z92.1	5254	463010	0.0113
ukb-b-10911	Diagnoses - secondary ICD10: Z92.2 Personal history of long-term (current) use of other medicaments	Z92.2	7915	463010	0.0171
ukb-b-14446	Diagnoses - secondary ICD10: Z92.3 Personal history of irradiation	Z92.3	1124	463010	0.0024
ukb-b-8092	Diagnoses - secondary ICD10: Z92.4 Personal history of major surgery, not elsewhere classified	Z92.4	1039	463010	0.0022
ukb-b-16967	Diagnoses - secondary ICD10: Z95.0 Presence of cardiac pacemaker	Z95.0	1266	463010	0.0027
ukb-b-11064	Diagnoses - secondary ICD10: Z95.1 Presence of aortocoronary bypass graft	Z95.1	3358	463010	0.0073
ukb-b-15748	Diagnoses - secondary ICD10: Z95.5 Presence of coronary angioplasty implant and graft	Z95.5	3724	463010	0.008
ukb-b-15230	Diagnoses - secondary ICD10: Z95.8 Presence of other cardiac and vascular implants and grafts	Z95.8	1034	463010	0.0022
ukb-b-11639	Diagnoses - secondary ICD10: Z96.1 Presence of intraocular lens	Z96.1	2240	463010	0.0048
ukb-b-20477	Diagnoses - secondary ICD10: Z96.6 Presence of orthopaedic joint implants	Z96.6	5687	463010	0.0123
ukb-b-2630	Diagnoses - secondary ICD10: Z98.0 Intestinal bypass and anastomosis status	Z98.0	1178	463010	0.0025

## Sheet: Table S7
Table S7 Genome-wide significant association of SNPs as genetic instruments of prioritized proteins
protein	catalog	SNP	trait	pmid	ancestry	year	beta	se	p
TLR1	GWAS	rs5743618	Lymphocyte count	27863252	European	2016	0.02661	0.004272	4.65e-10
TLR1	GWAS	rs5743618	Allergic disease	29083406	European	2017	0.0915	0.0067	2.73e-42
TLR1	GWAS	rs5743618	Pam3CSK4 induced interleukin 6 IL 6	23151486	European	2012	NA	NA	7.1e-24
TLR1	GWAS	rs5743618	Allergic disease asthma hay fever or eczema	29083406	European	2017	0.09531	0.005924	3e-58
TLR1	GWAS	rs5743618	Asthma	27182965	European	2016	NA	NA	4e-11
TLR1	GWAS	rs5743618	Asthma	UKBB	European	2017	0.007814	0.0009337	5.85e-17
TLR1	GWAS	rs5743618	Doctor diagnosed hayfever or allergic rhinitis	UKBB	European	2017	0.02414	0.002439	4.45e-23
TLR1	GWAS	rs5743618	Hayfever, allergic rhinitis or eczema	UKBB	European	2017	0.02297	0.001231	1.23e-77
TLR1	GWAS	rs5743618	Home area population density: Scotland large urban area	UKBB	European	2017	0.004145	0.0006282	4.15e-11
TLR1	GWAS	rs5743618	No blood clot, bronchitis, emphysema, asthma, rhinitis, eczema or allergy diagnosed by doctor	UKBB	European	2017	-0.02319	0.001365	1.02e-64
TLR1	GWAS	rs5743618	Self-reported asthma	UKBB	European	2017	0.007763	0.0009355	1.06e-16
TLR1	GWAS	rs5743618	Self-reported hayfever or allergic rhinitis	UKBB	European	2017	0.005759	0.0006795	2.36e-17
SNUPN	GWAS	rs7170787	Forced vital capacity	UKBB	European	2017	0.01377	0.002285	1.68e-09
SNUPN	GWAS	rs7170787	Forced vital capacity, best measure	UKBB	European	2017	0.01444	0.002508	8.51e-09
SNUPN	GWAS	rs7170787	Height	UKBB	European	2017	0.0191	0.001999	1.22e-21
SNUPN	GWAS	rs7170787	Sitting height	UKBB	European	2017	0.01684	0.002175	9.81e-15
SNUPN	GWAS	rs7170787	Trunk fat-free mass	UKBB	European	2017	0.009841	0.001772	2.8e-08
SNUPN	GWAS	rs7170787	Trunk predicted mass	UKBB	European	2017	0.009852	0.001766	2.43e-08
PDCD6	GWAS	rs56075848	Height	UKBB	European	2017	0.02134	0.003494	1.02e-09
PDCD6	GWAS	rs56075848	Sitting height	UKBB	European	2017	0.02195	0.003801	7.69e-09
PARK7	GWAS	rs17523802	Inflammatory bowel disease	26192919	European	2015	-0.1529	0.0248	7.36e-10
PARK7	GWAS	rs17523802	Height	UKBB	European	2017	0.01273	0.002282	2.43e-08
PARK7	GWAS	rs17523802	Trunk fat-free mass	UKBB	European	2017	0.01132	0.002023	2.18e-08
PARK7	GWAS	rs17523802	Trunk predicted mass	UKBB	European	2017	0.01106	0.002017	4.18e-08
MST1	GWAS	rs3197999	High light scatter percentage of red cells	27863252	European	2016	0.05469	0.003968	3.26e-43
MST1	GWAS	rs3197999	High light scatter reticulocyte count	27863252	European	2016	0.05401	0.003968	3.46e-42
MST1	GWAS	rs3197999	Immature fraction of reticulocytes	27863252	European	2016	0.03894	0.003931	3.87e-23
MST1	GWAS	rs3197999	Reticulocyte count	27863252	European	2016	0.05345	0.003975	3.18e-41
MST1	GWAS	rs3197999	Reticulocyte fraction of red cells	27863252	European	2016	0.05529	0.003973	4.98e-44
MST1	GWAS	rs3197999	Crohns disease	18587394	European	2008	NA	NA	5.76e-13
MST1	GWAS	rs3197999	Crohns disease	19915574	European	2009	NA	NA	6.57e-10
MST1	GWAS	rs3197999	Crohns disease	21102463	European	2010	NA	NA	6.17e-17
MST1	GWAS	rs3197999	Crohns disease	21150878	European	2010	NA	NA	1e-12
MST1	GWAS	rs3197999	Crohns disease	21297633	European	2011	NA	NA	6.17e-17
MST1	GWAS	rs3197999	Inflammatory bowel disease	23128233	European	2012	NA	NA	1.01e-47
MST1	GWAS	rs3197999	Irritable bowel disorder	19915574	European	2009	NA	NA	2.41e-11
MST1	GWAS	rs3197999	Primary sclerosing cholangitis	21151127	European	2010	NA	NA	1.1e-16
MST1	GWAS	rs3197999	Primary sclerosing cholangitis	23603763	European	2013	NA	NA	2.45e-26
MST1	GWAS	rs3197999	Selective immunoglobulin A deficiency IgAD	20694011	European	2010	NA	NA	1.2e-12
MST1	GWAS	rs3197999	Ulcerative colitis	20228799	European	2010	NA	NA	3.8e-09
MST1	GWAS	rs3197999	Ulcerative colitis	21297633	European	2011	NA	NA	1.86e-17
MST1	GWAS	rs3197999	Crohns disease	23128233	European	2012	NA	NA	6.2e-17
MST1	GWAS	rs3197999	Crohns disease	26192919	European	2015	-0.1751	0.0245	9.13e-13
MST1	GWAS	rs3197999	Inflammatory bowel disease	26192919	European	2015	-0.1719	0.0181	2.41e-21
MST1	GWAS	rs3197999	Ulcerative colitis	23128233	European	2012	NA	NA	1.86e-17
MST1	GWAS	rs3197999	Ulcerative colitis	26192919	European	2015	-0.1687	0.0228	1.49e-13
MST1	GWAS	rs3197999	Primary sclerosing cholangitis	27992413	European	2017	-0.2608	0.036	2.6e-13
MST1	GWAS	rs3197999	Crohns disease	18587394	European	2008	-0.1823	0.02557	1e-12
MST1	GWAS	rs3197999	Crohns disease	21102463	European	2010	-0.1989	0.02377	6e-17
MST1	GWAS	rs3197999	Crohns disease	26192919	European	2015	-0.1551	0.01288	2e-33
MST1	GWAS	rs3197999	Crohns disease	28067908	Mixed	2017	NA	NA	3e-23
MST1	GWAS	rs3197999	Inflammatory bowel disease	23128233	European	2012	NA	NA	1e-47
MST1	GWAS	rs3197999	Inflammatory bowel disease	28067908	Mixed	2017	NA	NA	1e-33
MST1	GWAS	rs3197999	Primary sclerosing cholangitis	21151127	European	2010	NA	NA	1e-16
MST1	GWAS	rs3197999	Primary sclerosing cholangitis	27992413	European	2017	-0.2852	0.02703	5e-26
MST1	GWAS	rs3197999	Ulcerative colitis	20228799	European	2010	NA	NA	4e-09
MST1	GWAS	rs3197999	Ulcerative colitis	26192919	European	2015	-0.1711	0.01338	2e-37
MST1	GWAS	rs3197999	Ulcerative colitis	28067908	Mixed	2017	NA	NA	8e-20
MST1	GWAS	rs3197999	Age completed full time education	UKBB	European	2017	-0.01694	0.002697	3.39e-10
MST1	GWAS	rs3197999	Arm fat mass left	UKBB	European	2017	0.01998	0.002639	3.72e-14
MST1	GWAS	rs3197999	Arm fat mass right	UKBB	European	2017	0.02041	0.002638	1.03e-14
MST1	GWAS	rs3197999	Arm fat percentage left	UKBB	European	2017	0.01502	0.002038	1.74e-13
MST1	GWAS	rs3197999	Arm fat percentage right	UKBB	European	2017	0.01498	0.002048	2.55e-13
MST1	GWAS	rs3197999	Body fat percentage	UKBB	European	2017	0.01524	0.002065	1.57e-13
MST1	GWAS	rs3197999	Body mass index	UKBB	European	2017	0.02228	0.002664	6.02e-17
MST1	GWAS	rs3197999	Diastolic blood pressure	UKBB	European	2017	0.01559	0.002731	1.15e-08
MST1	GWAS	rs3197999	Fed-up feelings	UKBB	European	2017	0.008714	0.001338	7.43e-11
MST1	GWAS	rs3197999	Fluid intelligence score	UKBB	European	2017	-0.05472	0.009977	4.16e-08
MST1	GWAS	rs3197999	Hip circumference	UKBB	European	2017	0.01546	0.002667	6.79e-09
MST1	GWAS	rs3197999	Job involves heavy manual or physical work	UKBB	European	2017	0.02059	0.003127	4.61e-11
MST1	GWAS	rs3197999	Job involves mainly walking or standing	UKBB	European	2017	0.02619	0.003975	4.44e-11
MST1	GWAS	rs3197999	Leg fat mass left	UKBB	European	2017	0.01734	0.002128	3.78e-16
MST1	GWAS	rs3197999	Leg fat mass right	UKBB	European	2017	0.01753	0.002153	3.82e-16
MST1	GWAS	rs3197999	Leg fat percentage left	UKBB	European	2017	0.01321	0.001684	4.4e-15
MST1	GWAS	rs3197999	Leg fat percentage right	UKBB	European	2017	0.0137	0.001705	9.57e-16
MST1	GWAS	rs3197999	Overall health rating	UKBB	European	2017	0.01313	0.001956	1.87e-11
MST1	GWAS	rs3197999	Qualifications: A levels or as levels or equivalent	UKBB	European	2017	-0.01073	0.00121	7.69e-19
MST1	GWAS	rs3197999	Qualifications: college or university degree	UKBB	European	2017	-0.01473	0.001262	1.91e-31
MST1	GWAS	rs3197999	Qualifications: none	UKBB	European	2017	0.006412	0.001024	3.73e-10
MST1	GWAS	rs3197999	Time spent watching television	UKBB	European	2017	0.0185	0.002073	4.44e-19
MST1	GWAS	rs3197999	Trunk fat mass	UKBB	European	2017	0.0184	0.002711	1.16e-11
MST1	GWAS	rs3197999	Trunk fat percentage	UKBB	European	2017	0.01635	0.002475	3.98e-11
MST1	GWAS	rs3197999	Weight	UKBB	European	2017	0.0157	0.002353	2.54e-11
MST1	GWAS	rs3197999	Whole body fat mass	UKBB	European	2017	0.02027	0.002627	1.19e-14
MST1	GWAS	rs3197999	Age at menarche	25231870	European	2014	0.031	0.005496	1.7e-08
MST1	GWAS	rs3197999	Years of educational attainment in females	27225129	European	2016	-0.026	0.004	1.36e-12
MST1	GWAS	rs3197999	Years of educational attainment in males	27225129	European	2016	-0.023	0.004	1.4e-08
MST1	GWAS	rs3197999	Years of educational attainment	27225129	European	2016	-0.024	0.003	3.64e-18
MST1	GWAS	rs3197999	Cholangitis sclerosing	21151127	European	2010	NA	NA	1e-16
MST1	GWAS	rs3197999	Colitis ulcerative	20228799	European	2010	NA	NA	4e-09
MST1	GWAS	rs3197999	Crohn disease	18587394	European	2008	NA	NA	1e-12
MST1	pQTL	rs3197999	Alcohol dehydrogenase 1B	29875488	European	2018	0.417	0.0263	7.76e-57
MST1	pQTL	rs3197999	Beta-crystallin B2	29875488	European	2018	0.1986	0.027	2e-13
MST1	pQTL	rs3197999	C-C motif chemokine 19	29875488	European	2018	0.2393	0.0269	5.25e-19
MST1	pQTL	rs3197999	Cerebral cavernous malformations 2 protein	29875488	European	2018	-0.1571	0.0271	6.76e-09
MST1	pQTL	rs3197999	Dedicator of cytokinesis protein 9	29875488	European	2018	0.297	0.0267	1.15e-28
MST1	pQTL	rs3197999	Erythrocyte band 7 integral membrane protein	29875488	European	2018	0.4795	0.0259	1.74e-76
MST1	pQTL	rs3197999	Killer cell lectin-like receptor subfamily F member 1	29875488	European	2018	0.1698	0.0271	3.55e-10
MST1	pQTL	rs3197999	Leukocyte cell-derived chemotaxin 1	29875488	European	2018	-0.1663	0.0271	8.13e-10
MST1	pQTL	rs3197999	PR domain zinc finger protein 1	29875488	European	2018	0.6522	0.0248	6.17e-153
MST1	pQTL	rs3197999	Set1/Ash2 histone methyltransferase complex subunit ASH2	29875488	European	2018	0.1634	0.0271	1.62e-09
MST1	pQTL	rs3197999	Sorting nexin-1	29875488	European	2018	0.1748	0.0271	1.05e-10
MST1	pQTL	rs3197999	Tensin-2	29875488	European	2018	0.3847	0.0264	4.37e-48
MST1	pQTL	rs3197999	Thioredoxin domain-containing protein 12	29875488	European	2018	-0.5709	0.0254	2.63e-112
MST1	pQTL	rs3197999	Transmembrane protease serine 11D	29875488	European	2018	0.533	0.0256	3.31e-96
MST1	pQTL	rs3197999	Tumor necrosis factor ligand superfamily member 6, soluble form	29875488	European	2018	-0.2134	0.027	2.63e-15
MST1	pQTL	rs3197999	Zinc finger protein 843	29875488	European	2018	0.157	0.0271	6.92e-09
LAYN	GWAS	rs4938792	Allergic disease	29083406	European	2017	-0.0337	0.0059	9.37e-09
LAYN	GWAS	rs4938792	Hayfever, allergic rhinitis or eczema	UKBB	European	2017	-0.00652	0.001051	5.55e-10
LAYN	GWAS	rs4938792	No blood clot, bronchitis, emphysema, asthma, rhinitis, eczema or allergy diagnosed by doctor	UKBB	European	2017	0.0075	0.001165	1.2e-10
LAYN	GWAS	rs4938792	Self-reported hypertension	UKBB	European	2017	0.006021	0.001091	3.41e-08
KDELC2	GWAS	rs141379009	Mean corpuscular hemoglobin	27863252	European	2016	-0.06334	0.01099	8.35e-09
KDELC2	GWAS	rs141379009	Mean corpuscular volume	27863252	European	2016	-0.05983	0.01096	4.81e-08
KDELC2	GWAS	rs141379009	Plateletcrit	27863252	European	2016	0.06998	0.01138	7.81e-10
KDELC2	GWAS	rs141379009	Impedance of arm right	UKBB	European	2017	-0.03089	0.005238	3.69e-09
KDELC2	GWAS	rs141379009	Leiomyoma of uterus	UKBB	European	2017	0.004966	0.0008391	3.26e-09
KDELC2	GWAS	rs141379009	Self-reported uterine fibroids	UKBB	European	2017	0.006771	0.0009123	1.16e-13
KDELC2	pQTL	rs141379009	KDEL motif-containing protein 2	29875488	European	2018	-1.269	0.0752	7.59e-64
HAPLN4	GWAS	rs55762233	Plateletcrit	27863252	European	2016	-0.03449	0.004986	4.61e-12
HAPLN4	GWAS	rs55762233	Body mass index	UKBB	European	2017	0.02	0.003278	1.06e-09
HAPLN4	GWAS	rs55762233	Height	UKBB	European	2017	-0.01869	0.002354	2.04e-15
HAPLN4	GWAS	rs55762233	Impedance of arm left	UKBB	European	2017	-0.01948	0.00234	8.29e-17
HAPLN4	GWAS	rs55762233	Impedance of arm right	UKBB	European	2017	-0.01942	0.00233	7.87e-17
HAPLN4	GWAS	rs55762233	Impedance of leg left	UKBB	European	2017	-0.01695	0.003021	2e-08
HAPLN4	GWAS	rs55762233	Impedance of leg right	UKBB	European	2017	-0.01722	0.002998	9.18e-09
HAPLN4	GWAS	rs55762233	Impedance of whole body	UKBB	European	2017	-0.0208	0.002526	1.82e-16
HAPLN4	GWAS	rs55762233	Sitting height	UKBB	European	2017	-0.01753	0.002561	7.75e-12
GPX1	GWAS	rs9823546	High light scatter percentage of red cells	27863252	European	2016	-0.05406	0.00393	4.79e-43
GPX1	GWAS	rs9823546	High light scatter reticulocyte count	27863252	European	2016	-0.05352	0.00393	3.12e-42
GPX1	GWAS	rs9823546	Immature fraction of reticulocytes	27863252	European	2016	-0.03852	0.003893	4.46e-23
GPX1	GWAS	rs9823546	Mean corpuscular volume	27863252	European	2016	-0.02202	0.003868	1.24e-08
GPX1	GWAS	rs9823546	Reticulocyte count	27863252	European	2016	-0.05344	0.003937	5.65e-42
GPX1	GWAS	rs9823546	Reticulocyte fraction of red cells	27863252	European	2016	-0.05515	0.003935	1.26e-44
GPX1	GWAS	rs9823546	Age first birth	27798627	European	2016	NA	NA	2.18e-08
GPX1	GWAS	rs9823546	Crohns disease	26192919	European	2015	0.1742	0.0241	4.6e-13
GPX1	GWAS	rs9823546	Inflammatory bowel disease	26192919	European	2015	0.1751	0.0177	5.87e-23
GPX1	GWAS	rs9823546	Ulcerative colitis	26192919	European	2015	0.1769	0.0223	2.29e-15
GPX1	GWAS	rs9823546	Primary sclerosing cholangitis	27992413	European	2017	0.2822	0.031	3.21e-20
GPX1	GWAS	rs9823546	Age completed full time education	UKBB	European	2017	0.01687	0.002674	2.82e-10
GPX1	GWAS	rs9823546	Arm fat mass left	UKBB	European	2017	-0.01967	0.002618	5.75e-14
GPX1	GWAS	rs9823546	Arm fat mass right	UKBB	European	2017	-0.02012	0.002617	1.48e-14
GPX1	GWAS	rs9823546	Arm fat percentage left	UKBB	European	2017	-0.0148	0.002022	2.51e-13
GPX1	GWAS	rs9823546	Arm fat percentage right	UKBB	European	2017	-0.0147	0.002031	4.54e-13
GPX1	GWAS	rs9823546	Body fat percentage	UKBB	European	2017	-0.01532	0.002048	7.38e-14
GPX1	GWAS	rs9823546	Body mass index	UKBB	European	2017	-0.02259	0.002642	1.26e-17
GPX1	GWAS	rs9823546	Diastolic blood pressure	UKBB	European	2017	-0.01601	0.002709	3.4e-09
GPX1	GWAS	rs9823546	Fed-up feelings	UKBB	European	2017	-0.008905	0.001327	1.96e-11
GPX1	GWAS	rs9823546	Fluid intelligence score	UKBB	European	2017	0.05496	0.009897	2.81e-08
GPX1	GWAS	rs9823546	Hip circumference	UKBB	European	2017	-0.01523	0.002645	8.51e-09
GPX1	GWAS	rs9823546	Impedance of arm left	UKBB	European	2017	0.01085	0.001886	8.96e-09
GPX1	GWAS	rs9823546	Job involves heavy manual or physical work	UKBB	European	2017	-0.02126	0.003102	7.17e-12
GPX1	GWAS	rs9823546	Job involves mainly walking or standing	UKBB	European	2017	-0.02739	0.003943	3.74e-12
GPX1	GWAS	rs9823546	Leg fat mass left	UKBB	European	2017	-0.01751	0.002111	1.1e-16
GPX1	GWAS	rs9823546	Leg fat mass right	UKBB	European	2017	-0.01765	0.002135	1.42e-16
GPX1	GWAS	rs9823546	Leg fat percentage left	UKBB	European	2017	-0.01352	0.00167	5.76e-16
GPX1	GWAS	rs9823546	Leg fat percentage right	UKBB	European	2017	-0.01398	0.001691	1.41e-16
GPX1	GWAS	rs9823546	Miserableness	UKBB	European	2017	-0.007298	0.001324	3.53e-08
GPX1	GWAS	rs9823546	Overall health rating	UKBB	European	2017	-0.01266	0.00194	6.7e-11
GPX1	GWAS	rs9823546	Qualifications: A levels or as levels or equivalent	UKBB	European	2017	0.0107	0.0012	5.02e-19
GPX1	GWAS	rs9823546	Qualifications: college or university degree	UKBB	European	2017	0.01451	0.001252	4.74e-31
GPX1	GWAS	rs9823546	Qualifications: none	UKBB	European	2017	-0.006288	0.001015	5.88e-10
GPX1	GWAS	rs9823546	Time spent watching television	UKBB	European	2017	-0.01832	0.002056	5.01e-19
GPX1	GWAS	rs9823546	Trunk fat mass	UKBB	European	2017	-0.01821	0.002689	1.27e-11
GPX1	GWAS	rs9823546	Trunk fat percentage	UKBB	European	2017	-0.01624	0.002455	3.74e-11
GPX1	GWAS	rs9823546	Weight	UKBB	European	2017	-0.01546	0.002334	3.5e-11
GPX1	GWAS	rs9823546	Whole body fat mass	UKBB	European	2017	-0.02024	0.002606	8.15e-15
GPX1	GWAS	rs9823546	Age at menarche	25231870	European	2014	-0.03	0.005369	2.3e-08
GPX1	GWAS	rs9823546	Years of educational attainment in females	27225129	European	2016	0.028	0.004	3.61e-14
GPX1	GWAS	rs9823546	Years of educational attainment in males	27225129	European	2016	0.024	0.004	1.79e-09
GPX1	GWAS	rs9823546	Years of educational attainment	27225129	European	2016	0.025	0.003	2.06e-20
GPX1	pQTL	rs9823546	ATPase family AAA domain-containing protein 1	29875488	European	2018	-0.1486	0.0267	2.69e-08
GPX1	pQTL	rs9823546	Alcohol dehydrogenase 1B	29875488	European	2018	-0.4172	0.0258	1.26e-58
GPX1	pQTL	rs9823546	Beta-crystallin B2	29875488	European	2018	-0.1907	0.0266	8.13e-13
GPX1	pQTL	rs9823546	C-C motif chemokine 19	29875488	European	2018	-0.2362	0.0265	4.57e-19
GPX1	pQTL	rs9823546	Cerebral cavernous malformations 2 protein	29875488	European	2018	0.1495	0.0267	2.19e-08
GPX1	pQTL	rs9823546	Dedicator of cytokinesis protein 9	29875488	European	2018	-0.288	0.0264	9.12e-28
GPX1	pQTL	rs9823546	Erythrocyte band 7 integral membrane protein	29875488	European	2018	-0.4711	0.0255	5.25e-76
GPX1	pQTL	rs9823546	Killer cell lectin-like receptor subfamily F member 1	29875488	European	2018	-0.1737	0.0267	7.24e-11
GPX1	pQTL	rs9823546	Leukocyte cell-derived chemotaxin 1	29875488	European	2018	0.1559	0.0267	5.37e-09
GPX1	pQTL	rs9823546	PR domain zinc finger protein 1	29875488	European	2018	-0.643	0.0244	4.47e-153
GPX1	pQTL	rs9823546	Set1/Ash2 histone methyltransferase complex subunit ASH2	29875488	European	2018	-0.1566	0.0267	4.57e-09
GPX1	pQTL	rs9823546	Sorting nexin-1	29875488	European	2018	-0.1698	0.0267	1.95e-10
GPX1	pQTL	rs9823546	Tensin-2	29875488	European	2018	-0.3782	0.026	7.76e-48
GPX1	pQTL	rs9823546	Thioredoxin domain-containing protein 12	29875488	European	2018	0.5611	0.025	1.26e-111
GPX1	pQTL	rs9823546	Transmembrane protease serine 11D	29875488	European	2018	-0.5208	0.0253	2.24e-94
GPX1	pQTL	rs9823546	Tumor necrosis factor ligand superfamily member 6, soluble form	29875488	European	2018	0.2134	0.0266	1e-15
GPX1	pQTL	rs9823546	Zinc finger protein 843	29875488	European	2018	-0.1526	0.0267	1.1e-08
GCDH	GWAS	rs2238641	High light scatter percentage of red cells	27863252	European	2016	0.02507	0.003702	1.28e-11
GCDH	GWAS	rs2238641	Mean corpuscular hemoglobin	27863252	European	2016	0.06959	0.003653	6.74e-81
GCDH	GWAS	rs2238641	Mean corpuscular hemoglobin concentration	27863252	European	2016	0.02815	0.003576	3.43e-15
GCDH	GWAS	rs2238641	Mean corpuscular volume	27863252	European	2016	0.06627	0.003643	5.9e-74
GCDH	GWAS	rs2238641	Red blood cell count	27863252	European	2016	-0.04898	0.003672	1.38e-40
GCDH	GWAS	rs2238641	Reticulocyte fraction of red cells	27863252	European	2016	0.02651	0.003706	8.49e-13
CTSF	GWAS	rs1044522	Impedance of leg right	UKBB	European	2017	-0.01403	0.002562	4.37e-08
CTSF	pQTL	rs1044522	Cathepsin F	29875488	European	2018	-0.2458	0.0286	7.76e-18
A4GALT	GWAS	rs8138197	Hematocrit	27863252	European	2016	0.02685	0.003536	3.11e-14
A4GALT	GWAS	rs8138197	Hemoglobin concentration	27863252	European	2016	0.03025	0.003551	1.62e-17
A4GALT	GWAS	rs8138197	Mean corpuscular volume	27863252	European	2016	-0.02018	0.003531	1.1e-08
A4GALT	GWAS	rs8138197	Red blood cell count	27863252	European	2016	0.0354	0.003563	2.98e-23

## Sheet: Table S8
Table S8 GO biological process enrichment for the suggestive proteins of BC_overall.
#term ID	term description	observed gene count	background gene count	strength	false discovery rate	matching proteins in your network (IDs)	matching proteins in your network (labels)
GO:0006790	Sulfur compound metabolic process	19	336	0.77	2.56e-05	9606.ENSP00000222002,9606.ENSP00000247933,9606.ENSP00000290765,9606.ENSP00000311469,9606.ENSP00000340278,9606.ENSP00000341206,9606.ENSP00000346964,9606.ENSP00000354213,9606.ENSP00000354357,9606.ENSP00000358851,9606.ENSP00000359258,9606.ENSP00000361140,9606.ENSP00000361642,9606.ENSP00000364935,9606.ENSP00000376807,9606.ENSP00000466845,9606.ENSP00000480884,9606.ENSP00000481912,9606.ENSP00000495750	SULT2A1,IDUA,GSTT2B,GSTM1,PARK7,CHST4,EGFLAM,HS3ST3B1,GSTM3,GSTM4,GCLM,AKR1A1,PPCS,CLIC1,DPEP1,GCDH,ST3GAL6,CHST12,GSS
GO:0006950	Response to stress	66	3358	0.31	3.01e-05	9606.ENSP00000215659,9606.ENSP00000215727,9606.ENSP00000215754,9606.ENSP00000216714,9606.ENSP00000223642,9606.ENSP00000229795,9606.ENSP00000243924,9606.ENSP00000244709,9606.ENSP00000247271,9606.ENSP00000252229,9606.ENSP00000252486,9606.ENSP00000253354,9606.ENSP00000259030,9606.ENSP00000264257,9606.ENSP00000264498,9606.ENSP00000264933,9606.ENSP00000265371,9606.ENSP00000267843,9606.ENSP00000279227,…	MAPK12,SERPIND1,MIF,APEX1,C5,MAPK14,PI3,TREM1,OMG,MICB,APOE,BPIFB1,RTP4,IL1RL2,FGF2,PDCD6,NRP1,FGF7,FERMT3,LILRA4,METAP1,ADH5,TLR3,LEAP2,PDIA3,RRM1,SMAD1,GSTM1,NQO1,GP1BA,FLRT3,PARK7,CHST4,PRDX6,RET,FCGR2B,GSTM3,TLR1,FH,F5,GCLM,CNPY3,TREM2,MBL2,CLIC1,NUDT2,AKR1C3,TNFRSF19,GRB2,DPEP1,MFAP4,MDK,TF,RAB1A,AOC1,MST1,SERPINA1,PPIA,IL18BP,ACADVL,RNASE4,CCL5,SPON2,HSPH1,GSS,ATXN3
GO:0042221	Response to chemical	74	4010	0.28	3.01e-05	9606.ENSP00000215727,9606.ENSP00000215754,9606.ENSP00000216714,9606.ENSP00000220003,9606.ENSP00000222002,9606.ENSP00000222330,9606.ENSP00000223642,9606.ENSP00000229795,9606.ENSP00000244709,9606.ENSP00000252229,9606.ENSP00000252486,9606.ENSP00000256104,9606.ENSP00000259030,9606.ENSP00000264257,9606.ENSP00000264498,9606.ENSP00000264933,9606.ENSP00000265371,9606.ENSP00000267843,9606.ENSP00000270077,…	SERPIND1,MIF,APEX1,CSK,SULT2A1,GSK3A,C5,MAPK14,TREM1,MICB,APOE,FABP4,RTP4,IL1RL2,FGF2,PDCD6,NRP1,FGF7,PSG9,BOC,EPHA1,LILRA4,AZGP1,ADH5,TLR3,PDIA3,SMAD1,GSTM1,PLXND1,CPNE1,MET,SHMT1,NQO1,EIF5A,FLRT3,PARK7,PRDX6,RET,FCGR2B,PLXNB2,GSTM3,TLR1,F5,SEMA4A,GSTM4,AS3MT,GCLM,AKR1A1,TREM2,APOM,NUDT2,POSTN,AKR1C4,AKR1C3,TNFRSF19,CRLF1,GRB2,DPEP1,ADH6,MDK,TF,PTPRJ,AOC1,MST1,PPIA,IL18BP,ASIP,CCL5,ST3GAL6,SPON2…
GO:0070887	Cellular response to chemical stimulus	56	2609	0.35	3.01e-05	9606.ENSP00000216714,9606.ENSP00000220003,9606.ENSP00000222002,9606.ENSP00000222330,9606.ENSP00000223642,9606.ENSP00000229795,9606.ENSP00000244709,9606.ENSP00000252486,9606.ENSP00000256104,9606.ENSP00000264257,9606.ENSP00000264498,9606.ENSP00000265371,9606.ENSP00000267843,9606.ENSP00000270077,9606.ENSP00000291759,9606.ENSP00000296412,9606.ENSP00000296795,9606.ENSP00000300289,9606.ENSP00000305769,…	APEX1,CSK,SULT2A1,GSK3A,C5,MAPK14,TREM1,APOE,FABP4,IL1RL2,FGF2,NRP1,FGF7,PSG9,LILRA4,ADH5,TLR3,PDIA3,SMAD1,GSTM1,CPNE1,SHMT1,NQO1,EIF5A,FLRT3,PARK7,PRDX6,RET,FCGR2B,GSTM3,GSTM4,AS3MT,GCLM,AKR1A1,TREM2,APOM,NUDT2,POSTN,AKR1C4,AKR1C3,TNFRSF19,CRLF1,GRB2,DPEP1,MDK,TF,PTPRJ,AOC1,MST1,PPIA,IL18BP,ASIP,CCL5,ST3GAL6,SPON2,ATXN3
GO:1901135	Carbohydrate derivative metabolic process	32	998	0.52	3.01e-05	9606.ENSP00000204679,9606.ENSP00000222002,9606.ENSP00000225927,9606.ENSP00000230431,9606.ENSP00000247933,9606.ENSP00000252603,9606.ENSP00000264498,9606.ENSP00000270776,9606.ENSP00000283646,9606.ENSP00000300738,9606.ENSP00000305603,9606.ENSP00000309640,9606.ENSP00000318868,9606.ENSP00000333019,9606.ENSP00000339479,9606.ENSP00000340278,9606.ENSP00000341206,9606.ENSP00000346964,9606.ENSP00000354213,…	GNPTG,SULT2A1,NAGLU,DNPH1,IDUA,PGLS,FGF2,PGD,RPIA,RRM1,FUT3,XXYLT1,SHMT1,ADSS1,NT5C2,PARK7,CHST4,EGFLAM,HS3ST3B1,AKR1A1,PPCS,NUDT2,AKR1C4,AKR1C3,A4GALT,PRPSAP1,LDHA,GCDH,FUT5,ST3GAL6,CHST12,ABO
GO:0006749	Glutathione metabolic process	9	61	1.18	5.9e-05	9606.ENSP00000290765,9606.ENSP00000311469,9606.ENSP00000340278,9606.ENSP00000354357,9606.ENSP00000358851,9606.ENSP00000359258,9606.ENSP00000364935,9606.ENSP00000376807,9606.ENSP00000495750	GSTT2B,GSTM1,PARK7,GSTM3,GSTM4,GCLM,CLIC1,DPEP1,GSS
GO:0009605	Response to external stimulus	51	2355	0.35	5.9e-05	9606.ENSP00000215727,9606.ENSP00000215754,9606.ENSP00000223642,9606.ENSP00000229795,9606.ENSP00000243924,9606.ENSP00000244709,9606.ENSP00000252486,9606.ENSP00000253354,9606.ENSP00000256104,9606.ENSP00000259030,9606.ENSP00000264257,9606.ENSP00000264498,9606.ENSP00000265371,9606.ENSP00000267843,9606.ENSP00000273395,9606.ENSP00000275815,9606.ENSP00000291759,9606.ENSP00000296412,9606.ENSP00000296795,…	SERPIND1,MIF,C5,MAPK14,PI3,TREM1,APOE,BPIFB1,FABP4,RTP4,IL1RL2,FGF2,NRP1,FGF7,BOC,EPHA1,LILRA4,ADH5,TLR3,LEAP2,PLXND1,MET,NQO1,EIF5A,FLRT3,RET,FCGR2B,PLXNB2,DCLK1,TLR1,F5,SEMA4A,GCLM,CNPY3,TREM2,MBL2,POSTN,AKR1C3,DPEP1,MFAP4,MDK,TF,RAB1A,PTPRJ,AOC1,PPIA,IL18BP,RNASE4,FAM20A,CCL5,SPON2
GO:0044281	Small molecule metabolic process	41	1645	0.41	5.9e-05	9606.ENSP00000215754,9606.ENSP00000222002,9606.ENSP00000229795,9606.ENSP00000230431,9606.ENSP00000252486,9606.ENSP00000260508,9606.ENSP00000261772,9606.ENSP00000264498,9606.ENSP00000270776,9606.ENSP00000283646,9606.ENSP00000296412,9606.ENSP00000296424,9606.ENSP00000300738,9606.ENSP00000311469,9606.ENSP00000318868,9606.ENSP00000319788,9606.ENSP00000333019,9606.ENSP00000339479,9606.ENSP00000340278,…	MIF,SULT2A1,MAPK14,DNPH1,APOE,KYAT3,AARS1,FGF2,PGD,RPIA,ADH5,BDH2,RRM1,GSTM1,SHMT1,NQO1,ADSS1,NT5C2,PARK7,FH,GSTM4,AS3MT,GCLM,AKR1A1,PPCS,NUDT2,AKR1C4,AKR1C3,DPEP1,ADH6,ACY1,TNXB,PRPSAP1,PLTP,ACADVL,APOA5,LDHA,GCDH,FUT5,SARS2,GSS
GO:0006935	Chemotaxis	21	516	0.62	9.51e-05	9606.ENSP00000215727,9606.ENSP00000215754,9606.ENSP00000223642,9606.ENSP00000229795,9606.ENSP00000244709,9606.ENSP00000264498,9606.ENSP00000265371,9606.ENSP00000267843,9606.ENSP00000273395,9606.ENSP00000275815,9606.ENSP00000317128,9606.ENSP00000317272,9606.ENSP00000339912,9606.ENSP00000347942,9606.ENSP00000352288,9606.ENSP00000357265,9606.ENSP00000376807,9606.ENSP00000385451,9606.ENSP00000400010,…	SERPIND1,MIF,C5,MAPK14,TREM1,FGF2,NRP1,FGF7,BOC,EPHA1,PLXND1,MET,FLRT3,RET,PLXNB2,SEMA4A,DPEP1,MDK,PTPRJ,PPIA,CCL5
GO:0030155	Regulation of cell adhesion	26	784	0.53	9.89e-05	9606.ENSP00000220003,9606.ENSP00000229795,9606.ENSP00000264257,9606.ENSP00000265371,9606.ENSP00000275815,9606.ENSP00000279227,9606.ENSP00000305603,9606.ENSP00000315630,9606.ENSP00000317128,9606.ENSP00000327599,9606.ENSP00000329380,9606.ENSP00000341206,9606.ENSP00000346964,9606.ENSP00000347942,9606.ENSP00000351497,9606.ENSP00000352288,9606.ENSP00000352936,9606.ENSP00000381133,9606.ENSP00000385451,…	CSK,MAPK14,IL1RL2,NRP1,EPHA1,FERMT3,FUT3,SWAP70,PLXND1,CLEC4G,GP1BA,CHST4,EGFLAM,RET,FCGR2B,PLXNB2,SPINK5,FGL1,MDK,PTPRJ,TNXB,TGFBI,ADGRG1,CCL5,HSPH1,ATXN3
GO:0006082	Organic acid metabolic process	27	868	0.51	0.00016	9606.ENSP00000215754,9606.ENSP00000222002,9606.ENSP00000229795,9606.ENSP00000260508,9606.ENSP00000261772,9606.ENSP00000270776,9606.ENSP00000296412,9606.ENSP00000296424,9606.ENSP00000311469,9606.ENSP00000318868,9606.ENSP00000340278,9606.ENSP00000355518,9606.ENSP00000358851,9606.ENSP00000358896,9606.ENSP00000359258,9606.ENSP00000361140,9606.ENSP00000369814,9606.ENSP00000369927,9606.ENSP00000376807,…	MIF,SULT2A1,MAPK14,KYAT3,AARS1,PGD,ADH5,BDH2,GSTM1,SHMT1,PARK7,FH,GSTM4,AS3MT,GCLM,AKR1A1,AKR1C4,AKR1C3,DPEP1,ADH6,ACY1,TNXB,ACADVL,LDHA,GCDH,SARS2,GSS
GO:0019752	Carboxylic acid metabolic process	26	819	0.52	0.00018	9606.ENSP00000215754,9606.ENSP00000222002,9606.ENSP00000229795,9606.ENSP00000260508,9606.ENSP00000261772,9606.ENSP00000270776,9606.ENSP00000296412,9606.ENSP00000296424,9606.ENSP00000311469,9606.ENSP00000318868,9606.ENSP00000340278,9606.ENSP00000355518,9606.ENSP00000358851,9606.ENSP00000359258,9606.ENSP00000361140,9606.ENSP00000369814,9606.ENSP00000369927,9606.ENSP00000376807,9606.ENSP00000378359,…	MIF,SULT2A1,MAPK14,KYAT3,AARS1,PGD,ADH5,BDH2,GSTM1,SHMT1,PARK7,FH,GSTM4,GCLM,AKR1A1,AKR1C4,AKR1C3,DPEP1,ADH6,ACY1,TNXB,ACADVL,LDHA,GCDH,SARS2,GSS
GO:1901564	Organonitrogen compound metabolic process	81	4981	0.22	0.00022	9606.ENSP00000204679,9606.ENSP00000215659,9606.ENSP00000220003,9606.ENSP00000222002,9606.ENSP00000222330,9606.ENSP00000223061,9606.ENSP00000225927,9606.ENSP00000229795,9606.ENSP00000230431,9606.ENSP00000243924,9606.ENSP00000246337,9606.ENSP00000247933,9606.ENSP00000251968,9606.ENSP00000252486,9606.ENSP00000260508,9606.ENSP00000261772,9606.ENSP00000264498,9606.ENSP00000265371,9606.ENSP00000269298,…	GNPTG,MAPK12,CSK,SULT2A1,GSK3A,PCOLCE,NAGLU,MAPK14,DNPH1,PI3,UROD,IDUA,TSG101,APOE,KYAT3,AARS1,FGF2,NRP1,SAT2,ACP1,EPHA1,CD109,GSTT2B,METAP1,ADH5,BDH2,TLR3,FUT3,SMAD1,XXYLT1,CTSF,GSTM1,CPNE1,MET,SHMT1,GP1BA,ADSS1,EIF5A,NT5C2,PARK7,CHST4,EGFLAM,RET,DCLK1,HS3ST3B1,GSTM3,FH,F5,GSTM4,GCLM,AKR1A1,CTSA,PPCS,MBL2,CLIC1,APOM,NUDT2,GGA1,DPEP1,ACY1,A4GALT,PCYOX1,PTPRJ,AOC1,MST1,DNAJB11,PRPSAP1,PPIA,EIF1AD,…
GO:0006575	Cellular modified amino acid metabolic process	12	178	0.84	0.00027	9606.ENSP00000222002,9606.ENSP00000290765,9606.ENSP00000311469,9606.ENSP00000318868,9606.ENSP00000340278,9606.ENSP00000354357,9606.ENSP00000358851,9606.ENSP00000359258,9606.ENSP00000364935,9606.ENSP00000376807,9606.ENSP00000387654,9606.ENSP00000495750	SULT2A1,GSTT2B,GSTM1,SHMT1,PARK7,GSTM3,GSTM4,GCLM,CLIC1,DPEP1,PCYOX1,GSS
GO:0007155	Cell adhesion	28	965	0.48	0.00027	9606.ENSP00000219197,9606.ENSP00000247271,9606.ENSP00000252483,9606.ENSP00000265371,9606.ENSP00000273395,9606.ENSP00000275815,9606.ENSP00000279227,9606.ENSP00000291481,9606.ENSP00000292401,9606.ENSP00000296411,9606.ENSP00000329380,9606.ENSP00000339912,9606.ENSP00000341206,9606.ENSP00000345008,9606.ENSP00000347942,9606.ENSP00000352288,9606.ENSP00000357362,9606.ENSP00000364935,9606.ENSP00000366513,…	CBLN1,OMG,NECTIN2,NRP1,BOC,EPHA1,FERMT3,HAPLN4,AZGP1,METAP1,GP1BA,FLRT3,CHST4,FBLN5,RET,PLXNB2,THBS3,CLIC1,CLSTN1,POSTN,MFAP4,RAB1A,TNXB,TGFBI,PPIA,ADGRG1,CCL5,SPON2
GO:0050896	Response to stimulus	111	7835	0.16	0.00027	9606.ENSP00000198536,9606.ENSP00000215659,9606.ENSP00000215727,9606.ENSP00000215754,9606.ENSP00000216714,9606.ENSP00000220003,9606.ENSP00000222002,9606.ENSP00000222330,9606.ENSP00000223136,9606.ENSP00000223642,9606.ENSP00000229795,9606.ENSP00000243924,9606.ENSP00000244519,9606.ENSP00000244709,9606.ENSP00000247271,9606.ENSP00000252229,9606.ENSP00000252486,9606.ENSP00000253354,9606.ENSP00000256104,…	PILRA,MAPK12,SERPIND1,MIF,APEX1,CSK,SULT2A1,GSK3A,FIS1,C5,MAPK14,PI3,BTN3A3,TREM1,OMG,MICB,APOE,BPIFB1,FABP4,RTP4,IL1RL2,FGF2,PDCD6,NRP1,FGF7,SERPINB13,PSG9,RAB5A,BOC,EPHA1,FERMT3,LILRA4,AZGP1,METAP1,ADH5,TLR3,LEAP2,PDIA3,RRM1,SMAD1,GSTM1,SWAP70,PLXND1,CPNE1,MET,SHMT1,NQO1,CLEC4G,GP1BA,EIF5A,FLRT3,PARK7,CHST4,PRDX6,RET,RSPO3,FCGR2B,PLXNB2,DCLK1,GSTM3,TLR1,FH,F5,SEMA4A,GSTM4,AS3MT,GCLM,OLFM1,AKR1A…
GO:0050790	Regulation of catalytic activity	48	2370	0.32	0.00046	9606.ENSP00000215659,9606.ENSP00000215727,9606.ENSP00000215754,9606.ENSP00000220003,9606.ENSP00000222330,9606.ENSP00000223061,9606.ENSP00000223136,9606.ENSP00000223642,9606.ENSP00000229795,9606.ENSP00000243924,9606.ENSP00000251968,9606.ENSP00000252486,9606.ENSP00000256104,9606.ENSP00000264498,9606.ENSP00000264933,9606.ENSP00000265371,9606.ENSP00000269489,9606.ENSP00000275815,9606.ENSP00000287097,…	MAPK12,SERPIND1,MIF,CSK,GSK3A,PCOLCE,FIS1,C5,MAPK14,PI3,TSG101,APOE,FABP4,FGF2,PDCD6,NRP1,SERPINB13,EPHA1,CD109,TLR3,CST6,SWAP70,PLXND1,MET,NQO1,WFIKKN1,PARK7,RET,PLXNB2,SPINK5,GCLM,CTSA,YWHAB,TREM2,GDI2,DPEP1,ANXA4,AGFG1,PTPRJ,TNXB,MST1,PRPSAP1,SERPINA1,PPIA,TNFAIP8,APOA5,FAM20A,CCL5
GO:0043086	Negative regulation of catalytic activity	24	771	0.51	0.00052	9606.ENSP00000215727,9606.ENSP00000220003,9606.ENSP00000222330,9606.ENSP00000223642,9606.ENSP00000243924,9606.ENSP00000251968,9606.ENSP00000252486,9606.ENSP00000256104,9606.ENSP00000269489,9606.ENSP00000275815,9606.ENSP00000287097,9606.ENSP00000311313,9606.ENSP00000319788,9606.ENSP00000324763,9606.ENSP00000340278,9606.ENSP00000352936,9606.ENSP00000361930,9606.ENSP00000376807,9606.ENSP00000377833,…	SERPIND1,CSK,GSK3A,C5,PI3,TSG101,APOE,FABP4,SERPINB13,EPHA1,CD109,CST6,NQO1,WFIKKN1,PARK7,SPINK5,YWHAB,DPEP1,ANXA4,PTPRJ,PRPSAP1,SERPINA1,PPIA,TNFAIP8
GO:0050918	Positive chemotaxis	7	46	1.2	0.00052	9606.ENSP00000215754,9606.ENSP00000264498,9606.ENSP00000265371,9606.ENSP00000267843,9606.ENSP00000317272,9606.ENSP00000400010,9606.ENSP00000474412	MIF,FGF2,NRP1,FGF7,MET,PTPRJ,CCL5
GO:0051246	Regulation of protein metabolic process	51	2622	0.3	0.00053	9606.ENSP00000215659,9606.ENSP00000215727,9606.ENSP00000215754,9606.ENSP00000220003,9606.ENSP00000222330,9606.ENSP00000223061,9606.ENSP00000223136,9606.ENSP00000223642,9606.ENSP00000243924,9606.ENSP00000251968,9606.ENSP00000252486,9606.ENSP00000256104,9606.ENSP00000261772,9606.ENSP00000264498,9606.ENSP00000264933,9606.ENSP00000265371,9606.ENSP00000267843,9606.ENSP00000269489,9606.ENSP00000275815,…	MAPK12,SERPIND1,MIF,CSK,GSK3A,PCOLCE,FIS1,C5,PI3,TSG101,APOE,FABP4,AARS1,FGF2,PDCD6,NRP1,FGF7,SERPINB13,EPHA1,CD109,METAP1,TLR3,CST6,SWAP70,SHMT1,NQO1,WFIKKN1,EIF5A,PARK7,RET,PLXNB2,SPINK5,FH,CTSA,YWHAB,TREM2,GGA1,CRLF1,DPEP1,RAB1A,PTPRJ,TNXB,MST1,SERPINA1,PPIA,TNFAIP8,EIF1AD,GGA3,FAM20A,CCL5,ATXN3
GO:0071704	Organic substance metabolic process	106	7522	0.16	0.00068	9606.ENSP00000204679,9606.ENSP00000215659,9606.ENSP00000215754,9606.ENSP00000216714,9606.ENSP00000220003,9606.ENSP00000220496,9606.ENSP00000222002,9606.ENSP00000222330,9606.ENSP00000223061,9606.ENSP00000225927,9606.ENSP00000229795,9606.ENSP00000230431,9606.ENSP00000243924,9606.ENSP00000246337,9606.ENSP00000247933,9606.ENSP00000251968,9606.ENSP00000252486,9606.ENSP00000252603,9606.ENSP00000260508,…	GNPTG,MAPK12,MIF,APEX1,CSK,DNAJC17,SULT2A1,GSK3A,PCOLCE,NAGLU,MAPK14,DNPH1,PI3,UROD,IDUA,TSG101,APOE,PGLS,KYAT3,AARS1,FGF2,NRP1,SAT2,PSG9,PGD,ACP1,EPHA1,RPIA,CD109,GSTT2B,AZGP1,METAP1,ADH5,BDH2,TLR3,RRM1,FUT3,SMAD1,XXYLT1,CTSF,GSTM1,SWAP70,CPNE1,MET,SHMT1,NQO1,GP1BA,ADSS1,EIF5A,NT5C2,PARK7,CHST4,PRDX6,EGFLAM,RET,DCLK1,HS3ST3B1,GSTM3,AMY2B,FH,F5,GSTM4,AS3MT,GCLM,AKR1A1,CTSA,PPCS,MBL2,CLIC1,APOM,NU…
GO:0044419	Biological process involved in interspecies interaction between organisms	35	1490	0.38	0.00073	9606.ENSP00000215754,9606.ENSP00000223642,9606.ENSP00000229795,9606.ENSP00000243924,9606.ENSP00000244709,9606.ENSP00000251968,9606.ENSP00000252483,9606.ENSP00000252486,9606.ENSP00000253354,9606.ENSP00000256104,9606.ENSP00000259030,9606.ENSP00000264257,9606.ENSP00000265371,9606.ENSP00000273047,9606.ENSP00000291759,9606.ENSP00000296412,9606.ENSP00000296795,9606.ENSP00000296877,9606.ENSP00000327599,…	MIF,C5,MAPK14,PI3,TREM1,TSG101,NECTIN2,APOE,BPIFB1,FABP4,RTP4,IL1RL2,NRP1,RAB5A,LILRA4,ADH5,TLR3,LEAP2,CLEC4G,EIF5A,FCGR2B,DCLK1,TLR1,CNPY3,TREM2,MBL2,MFAP4,TF,RAB1A,PPIA,IL18BP,RNASE4,FAM20A,CCL5,SPON2
GO:0030334	Regulation of cell migration	26	927	0.46	0.00093	9606.ENSP00000215754,9606.ENSP00000216714,9606.ENSP00000223642,9606.ENSP00000252486,9606.ENSP00000264498,9606.ENSP00000264933,9606.ENSP00000265371,9606.ENSP00000267843,9606.ENSP00000275815,9606.ENSP00000279227,9606.ENSP00000305603,9606.ENSP00000315630,9606.ENSP00000317128,9606.ENSP00000317272,9606.ENSP00000329380,9606.ENSP00000341206,9606.ENSP00000347942,9606.ENSP00000352288,9606.ENSP00000357265,…	MIF,APEX1,C5,APOE,FGF2,PDCD6,NRP1,FGF7,EPHA1,FERMT3,FUT3,SWAP70,PLXND1,MET,GP1BA,CHST4,RET,PLXNB2,SEMA4A,TREM2,DPEP1,MDK,PTPRJ,MST1,ADGRG1,CCL5
GO:2000145	Regulation of cell motility	27	988	0.45	0.00093	9606.ENSP00000215754,9606.ENSP00000216714,9606.ENSP00000223642,9606.ENSP00000252486,9606.ENSP00000264498,9606.ENSP00000264933,9606.ENSP00000265371,9606.ENSP00000267843,9606.ENSP00000275815,9606.ENSP00000279227,9606.ENSP00000305603,9606.ENSP00000315630,9606.ENSP00000317128,9606.ENSP00000317272,9606.ENSP00000329380,9606.ENSP00000341206,9606.ENSP00000347942,9606.ENSP00000352288,9606.ENSP00000357265,…	MIF,APEX1,C5,APOE,FGF2,PDCD6,NRP1,FGF7,EPHA1,FERMT3,FUT3,SWAP70,PLXND1,MET,GP1BA,CHST4,RET,PLXNB2,SEMA4A,TREM2,DPEP1,MDK,TF,PTPRJ,MST1,ADGRG1,CCL5
GO:1990748	Cellular detoxification	9	106	0.94	0.00094	9606.ENSP00000252486,9606.ENSP00000296412,9606.ENSP00000311469,9606.ENSP00000319788,9606.ENSP00000340278,9606.ENSP00000342026,9606.ENSP00000354357,9606.ENSP00000361140,9606.ENSP00000365081	APOE,ADH5,GSTM1,NQO1,PARK7,PRDX6,GSTM3,AKR1A1,APOM
GO:0052547	Regulation of peptidase activity	17	446	0.59	0.0014	9606.ENSP00000215659,9606.ENSP00000215727,9606.ENSP00000223061,9606.ENSP00000223136,9606.ENSP00000223642,9606.ENSP00000243924,9606.ENSP00000264933,9606.ENSP00000269489,9606.ENSP00000287097,9606.ENSP00000311313,9606.ENSP00000324763,9606.ENSP00000340278,9606.ENSP00000347942,9606.ENSP00000352936,9606.ENSP00000376807,9606.ENSP00000416066,9606.ENSP00000427424	MAPK12,SERPIND1,PCOLCE,FIS1,C5,PI3,PDCD6,SERPINB13,CD109,CST6,WFIKKN1,PARK7,RET,SPINK5,DPEP1,SERPINA1,TNFAIP8
GO:0048856	Anatomical structure development	79	5117	0.2	0.0015	9606.ENSP00000064780,9606.ENSP00000215659,9606.ENSP00000219197,9606.ENSP00000220003,9606.ENSP00000222330,9606.ENSP00000223136,9606.ENSP00000223642,9606.ENSP00000225927,9606.ENSP00000229795,9606.ENSP00000230431,9606.ENSP00000247271,9606.ENSP00000251968,9606.ENSP00000252483,9606.ENSP00000252486,9606.ENSP00000255784,9606.ENSP00000261772,9606.ENSP00000263671,9606.ENSP00000264498,9606.ENSP00000264933,…	RELT,MAPK12,CBLN1,CSK,GSK3A,FIS1,C5,NAGLU,MAPK14,DNPH1,OMG,TSG101,NECTIN2,APOE,CCDC134,AARS1,CHRDL2,FGF2,PDCD6,NRP1,FGF7,PSG9,BOC,EPHA1,FERMT3,CD109,HAPLN4,BDH2,TLR3,CYB5D2,SMAD1,CST6,SWAP70,PLXND1,CPNE1,MET,WFIKKN1,CLEC4G,GP1BA,FLRT3,ADAMTSL2,EGFLAM,RET,RSPO3,FCGR2B,PLXNB2,SPINK5,DCLK1,HS3ST3B1,GSTM3,ISLR2,SEMA4A,THBS3,OLFM1,TREM2,POSTN,AKR1C3,TNFRSF19,CRLF1,GRB2,ANXA4,FGL1,MDK,TF,AGFG1,RAB1A,PT…
GO:0008152	Metabolic process	109	7988	0.15	0.0017	9606.ENSP00000204679,9606.ENSP00000215659,9606.ENSP00000215754,9606.ENSP00000216714,9606.ENSP00000220003,9606.ENSP00000220496,9606.ENSP00000222002,9606.ENSP00000222330,9606.ENSP00000223061,9606.ENSP00000223136,9606.ENSP00000225927,9606.ENSP00000229795,9606.ENSP00000230431,9606.ENSP00000243924,9606.ENSP00000246337,9606.ENSP00000247933,9606.ENSP00000251968,9606.ENSP00000252486,9606.ENSP00000252603,…	GNPTG,MAPK12,MIF,APEX1,CSK,DNAJC17,SULT2A1,GSK3A,PCOLCE,FIS1,NAGLU,MAPK14,DNPH1,PI3,UROD,IDUA,TSG101,APOE,PGLS,KYAT3,AARS1,FGF2,NRP1,SAT2,PSG9,PGD,ACP1,EPHA1,RPIA,CD109,GSTT2B,AZGP1,METAP1,ADH5,BDH2,TLR3,RRM1,FUT3,SMAD1,XXYLT1,CTSF,GSTM1,SWAP70,CPNE1,MET,SHMT1,NQO1,GP1BA,ADSS1,EIF5A,NT5C2,PARK7,CHST4,PRDX6,EGFLAM,RET,DCLK1,HS3ST3B1,GSTM3,AMY2B,FH,F5,GSTM4,AS3MT,GCLM,AKR1A1,CTSA,PPCS,TREM2,MBL2,CL…
GO:0051248	Negative regulation of protein metabolic process	27	1038	0.43	0.0018	9606.ENSP00000215727,9606.ENSP00000215754,9606.ENSP00000223642,9606.ENSP00000243924,9606.ENSP00000251968,9606.ENSP00000252486,9606.ENSP00000256104,9606.ENSP00000269489,9606.ENSP00000275815,9606.ENSP00000287097,9606.ENSP00000311313,9606.ENSP00000315630,9606.ENSP00000318868,9606.ENSP00000319788,9606.ENSP00000324763,9606.ENSP00000340278,9606.ENSP00000352936,9606.ENSP00000355518,9606.ENSP00000361562,…	SERPIND1,MIF,C5,PI3,TSG101,APOE,FABP4,SERPINB13,EPHA1,CD109,CST6,SWAP70,SHMT1,NQO1,WFIKKN1,PARK7,SPINK5,FH,CTSA,YWHAB,TREM2,DPEP1,PTPRJ,SERPINA1,PPIA,TNFAIP8,GGA3
GO:0005975	Carbohydrate metabolic process	17	470	0.57	0.0022	9606.ENSP00000204679,9606.ENSP00000222330,9606.ENSP00000229795,9606.ENSP00000247933,9606.ENSP00000252603,9606.ENSP00000270776,9606.ENSP00000283646,9606.ENSP00000305603,9606.ENSP00000341206,9606.ENSP00000354610,9606.ENSP00000361140,9606.ENSP00000445175,9606.ENSP00000466880,9606.ENSP00000480884,9606.ENSP00000481450,9606.ENSP00000481912,9606.ENSP00000483018	GNPTG,GSK3A,MAPK14,IDUA,PGLS,PGD,RPIA,FUT3,CHST4,AMY2B,AKR1A1,LDHA,FUT5,ST3GAL6,AMY2A,CHST12,ABO
GO:0007166	Cell surface receptor signaling pathway	41	2040	0.32	0.0026	9606.ENSP00000215754,9606.ENSP00000220003,9606.ENSP00000222330,9606.ENSP00000223642,9606.ENSP00000229795,9606.ENSP00000244519,9606.ENSP00000252229,9606.ENSP00000264257,9606.ENSP00000264498,9606.ENSP00000264933,9606.ENSP00000265371,9606.ENSP00000267843,9606.ENSP00000270077,9606.ENSP00000273047,9606.ENSP00000273395,9606.ENSP00000275815,9606.ENSP00000279227,9606.ENSP00000291759,9606.ENSP00000296795,…	MIF,CSK,GSK3A,C5,MAPK14,BTN3A3,MICB,IL1RL2,FGF2,PDCD6,NRP1,FGF7,PSG9,RAB5A,BOC,EPHA1,FERMT3,LILRA4,TLR3,PDIA3,SMAD1,PLXND1,MET,GP1BA,EIF5A,FLRT3,RET,RSPO3,FCGR2B,PLXNB2,SEMA4A,TREM2,MBL2,TNFRSF19,CRLF1,GRB2,ANXA4,TF,PTPRJ,ADGRG1,CCL5
GO:0010951	Negative regulation of endopeptidase activity	12	240	0.71	0.0026	9606.ENSP00000215727,9606.ENSP00000223642,9606.ENSP00000243924,9606.ENSP00000269489,9606.ENSP00000287097,9606.ENSP00000311313,9606.ENSP00000324763,9606.ENSP00000340278,9606.ENSP00000352936,9606.ENSP00000376807,9606.ENSP00000416066,9606.ENSP00000427424	SERPIND1,C5,PI3,SERPINB13,CD109,CST6,WFIKKN1,PARK7,SPINK5,DPEP1,SERPINA1,TNFAIP8
GO:0044092	Negative regulation of molecular function	28	1143	0.4	0.0031	9606.ENSP00000215727,9606.ENSP00000220003,9606.ENSP00000222330,9606.ENSP00000223642,9606.ENSP00000243924,9606.ENSP00000251968,9606.ENSP00000252486,9606.ENSP00000256104,9606.ENSP00000269489,9606.ENSP00000275815,9606.ENSP00000287097,9606.ENSP00000311313,9606.ENSP00000317257,9606.ENSP00000317272,9606.ENSP00000319788,9606.ENSP00000324763,9606.ENSP00000340278,9606.ENSP00000352936,9606.ENSP00000361930,…	SERPIND1,CSK,GSK3A,C5,PI3,TSG101,APOE,FABP4,SERPINB13,EPHA1,CD109,CST6,CPNE1,MET,NQO1,WFIKKN1,PARK7,SPINK5,YWHAB,DPEP1,ANXA4,PTPRJ,PRPSAP1,SERPINA1,PPIA,TNFAIP8,IL18BP,CCL5
GO:1905521	Regulation of macrophage migration	6	44	1.15	0.0033	9606.ENSP00000215754,9606.ENSP00000223642,9606.ENSP00000362205,9606.ENSP00000385451,9606.ENSP00000414287,9606.ENSP00000474412	MIF,C5,TREM2,MDK,MST1,CCL5
GO:0009653	Anatomical structure morphogenesis	43	2229	0.3	0.0035	9606.ENSP00000064780,9606.ENSP00000219197,9606.ENSP00000222330,9606.ENSP00000223136,9606.ENSP00000225927,9606.ENSP00000229795,9606.ENSP00000252483,9606.ENSP00000252486,9606.ENSP00000255784,9606.ENSP00000264498,9606.ENSP00000264933,9606.ENSP00000265371,9606.ENSP00000267843,9606.ENSP00000273395,9606.ENSP00000275815,9606.ENSP00000279227,9606.ENSP00000287097,9606.ENSP00000305769,9606.ENSP00000311313,…	RELT,CBLN1,GSK3A,FIS1,NAGLU,MAPK14,NECTIN2,APOE,CCDC134,FGF2,PDCD6,NRP1,FGF7,BOC,EPHA1,FERMT3,CD109,SMAD1,CST6,PLXND1,CPNE1,MET,GP1BA,FLRT3,EGFLAM,RET,RSPO3,PLXNB2,DCLK1,HS3ST3B1,SEMA4A,THBS3,OLFM1,GRB2,FGL1,MDK,AGFG1,RAB1A,FJX1,MST1,TGFBI,ADGRG1,FAM20A
GO:0009888	Tissue development	36	1723	0.33	0.0039	9606.ENSP00000229795,9606.ENSP00000230431,9606.ENSP00000251968,9606.ENSP00000263671,9606.ENSP00000264498,9606.ENSP00000264933,9606.ENSP00000265371,9606.ENSP00000267843,9606.ENSP00000287097,9606.ENSP00000296424,9606.ENSP00000305769,9606.ENSP00000311313,9606.ENSP00000317128,9606.ENSP00000317272,9606.ENSP00000339912,9606.ENSP00000346478,9606.ENSP00000346964,9606.ENSP00000347942,9606.ENSP00000349131,…	MAPK14,DNPH1,TSG101,CHRDL2,FGF2,PDCD6,NRP1,FGF7,CD109,BDH2,SMAD1,CST6,PLXND1,MET,FLRT3,ADAMTSL2,EGFLAM,RET,RSPO3,PLXNB2,SPINK5,HS3ST3B1,GSTM3,SEMA4A,THBS3,OLFM1,POSTN,AKR1C3,TNFRSF19,CRLF1,GRB2,ANXA4,MST1,TGFBI,ACADVL,FAM20A
GO:0032502	Developmental process	83	5657	0.18	0.004	9606.ENSP00000064780,9606.ENSP00000215659,9606.ENSP00000216714,9606.ENSP00000219197,9606.ENSP00000220003,9606.ENSP00000222330,9606.ENSP00000223136,9606.ENSP00000223642,9606.ENSP00000225927,9606.ENSP00000229795,9606.ENSP00000230431,9606.ENSP00000247271,9606.ENSP00000251968,9606.ENSP00000252483,9606.ENSP00000252486,9606.ENSP00000255784,9606.ENSP00000256104,9606.ENSP00000261772,9606.ENSP00000263671,…	RELT,MAPK12,APEX1,CBLN1,CSK,GSK3A,FIS1,C5,NAGLU,MAPK14,DNPH1,OMG,TSG101,NECTIN2,APOE,CCDC134,FABP4,AARS1,CHRDL2,FGF2,PDCD6,NRP1,FGF7,PSG9,BOC,EPHA1,FERMT3,CD109,HAPLN4,BDH2,TLR3,CYB5D2,SMAD1,CST6,SWAP70,PLXND1,CPNE1,MET,NQO1,WFIKKN1,CLEC4G,GP1BA,FLRT3,ADAMTSL2,EGFLAM,RET,RSPO3,FCGR2B,PLXNB2,SPINK5,DCLK1,HS3ST3B1,GSTM3,ISLR2,SEMA4A,THBS3,GCLM,OLFM1,TREM2,POSTN,AKR1C3,TNFRSF19,CRLF1,GRB2,ANXA4,FGL1…
GO:0032787	Monocarboxylic acid metabolic process	17	502	0.54	0.004	9606.ENSP00000215754,9606.ENSP00000222002,9606.ENSP00000229795,9606.ENSP00000270776,9606.ENSP00000296412,9606.ENSP00000296424,9606.ENSP00000311469,9606.ENSP00000340278,9606.ENSP00000358851,9606.ENSP00000361140,9606.ENSP00000369814,9606.ENSP00000369927,9606.ENSP00000378359,9606.ENSP00000407685,9606.ENSP00000438689,9606.ENSP00000445175,9606.ENSP00000466845	MIF,SULT2A1,MAPK14,PGD,ADH5,BDH2,GSTM1,PARK7,GSTM4,AKR1A1,AKR1C4,AKR1C3,ADH6,TNXB,ACADVL,LDHA,GCDH
GO:0043523	Regulation of neuron apoptotic process	11	216	0.72	0.0044	9606.ENSP00000222330,9606.ENSP00000252486,9606.ENSP00000261772,9606.ENSP00000265371,9606.ENSP00000317128,9606.ENSP00000319788,9606.ENSP00000340278,9606.ENSP00000359258,9606.ENSP00000362205,9606.ENSP00000376188,9606.ENSP00000385451	GSK3A,APOE,AARS1,NRP1,PLXND1,NQO1,PARK7,GCLM,TREM2,CRLF1,MDK
GO:0051130	Positive regulation of cellular component organization	26	1049	0.41	0.0045	9606.ENSP00000219197,9606.ENSP00000222330,9606.ENSP00000223136,9606.ENSP00000229795,9606.ENSP00000251968,9606.ENSP00000252486,9606.ENSP00000265371,9606.ENSP00000275815,9606.ENSP00000315630,9606.ENSP00000317128,9606.ENSP00000317272,9606.ENSP00000336702,9606.ENSP00000339912,9606.ENSP00000340278,9606.ENSP00000347942,9606.ENSP00000352288,9606.ENSP00000355402,9606.ENSP00000357265,9606.ENSP00000362205,…	CBLN1,GSK3A,FIS1,MAPK14,TSG101,APOE,NRP1,EPHA1,SWAP70,PLXND1,MET,EIF5A,FLRT3,PARK7,RET,PLXNB2,ISLR2,SEMA4A,TREM2,CLSTN1,GRB2,MDK,TF,PTPRJ,TNXB,APOA5
GO:0030162	Regulation of proteolysis	21	739	0.47	0.0046	9606.ENSP00000215659,9606.ENSP00000215727,9606.ENSP00000222330,9606.ENSP00000223061,9606.ENSP00000223136,9606.ENSP00000223642,9606.ENSP00000243924,9606.ENSP00000252486,9606.ENSP00000264933,9606.ENSP00000269489,9606.ENSP00000287097,9606.ENSP00000311313,9606.ENSP00000324763,9606.ENSP00000340278,9606.ENSP00000347942,9606.ENSP00000352936,9606.ENSP00000362205,9606.ENSP00000376807,9606.ENSP00000416066,…	MAPK12,SERPIND1,GSK3A,PCOLCE,FIS1,C5,PI3,APOE,PDCD6,SERPINB13,CD109,CST6,WFIKKN1,PARK7,RET,SPINK5,TREM2,DPEP1,SERPINA1,TNFAIP8,ATXN3
GO:0002376	Immune system process	41	2121	0.3	0.0047	9606.ENSP00000215754,9606.ENSP00000220003,9606.ENSP00000223642,9606.ENSP00000229795,9606.ENSP00000243924,9606.ENSP00000244519,9606.ENSP00000244709,9606.ENSP00000252229,9606.ENSP00000253354,9606.ENSP00000255784,9606.ENSP00000264257,9606.ENSP00000270077,9606.ENSP00000287097,9606.ENSP00000291759,9606.ENSP00000292401,9606.ENSP00000296795,9606.ENSP00000296877,9606.ENSP00000300289,9606.ENSP00000310832,…	MIF,CSK,C5,MAPK14,PI3,BTN3A3,TREM1,MICB,BPIFB1,CCDC134,IL1RL2,PSG9,CD109,LILRA4,AZGP1,TLR3,LEAP2,PDIA3,CTSF,SWAP70,CLEC4G,GP1BA,ADSS1,CHST4,RET,FCGR2B,TLR1,SEMA4A,CNPY3,TREM2,MBL2,DPEP1,MFAP4,FGL1,MDK,TF,PTPRJ,PPIA,IL18BP,CCL5,SPON2
GO:0048585	Negative regulation of response to stimulus	34	1612	0.34	0.0051	9606.ENSP00000215754,9606.ENSP00000219197,9606.ENSP00000220003,9606.ENSP00000222330,9606.ENSP00000223642,9606.ENSP00000229795,9606.ENSP00000251968,9606.ENSP00000252229,9606.ENSP00000252486,9606.ENSP00000253354,9606.ENSP00000263671,9606.ENSP00000264498,9606.ENSP00000264933,9606.ENSP00000265371,9606.ENSP00000287097,9606.ENSP00000291759,9606.ENSP00000317257,9606.ENSP00000317272,9606.ENSP00000324763,…	MIF,CBLN1,CSK,GSK3A,C5,MAPK14,TSG101,MICB,APOE,BPIFB1,CHRDL2,FGF2,PDCD6,NRP1,CD109,LILRA4,CPNE1,MET,WFIKKN1,CLEC4G,GP1BA,PARK7,ADAMTSL2,DLK2,FCGR2B,SPINK5,SEMA4A,GCLM,YWHAB,TREM2,MDK,PTPRJ,PPIA,CCL5
GO:0010758	Regulation of macrophage chemotaxis	5	29	1.25	0.0052	9606.ENSP00000215754,9606.ENSP00000223642,9606.ENSP00000385451,9606.ENSP00000414287,9606.ENSP00000474412	MIF,C5,MDK,MST1,CCL5
GO:0019748	Secondary metabolic process	6	51	1.08	0.0052	9606.ENSP00000296424,9606.ENSP00000358896,9606.ENSP00000361140,9606.ENSP00000369814,9606.ENSP00000369927,9606.ENSP00000454804	BDH2,AS3MT,AKR1A1,AKR1C4,AKR1C3,ASIP
GO:0048646	Anatomical structure formation involved in morphogenesis	24	938	0.42	0.0052	9606.ENSP00000064780,9606.ENSP00000219197,9606.ENSP00000229795,9606.ENSP00000252483,9606.ENSP00000255784,9606.ENSP00000264498,9606.ENSP00000264933,9606.ENSP00000265371,9606.ENSP00000275815,9606.ENSP00000287097,9606.ENSP00000305769,9606.ENSP00000317128,9606.ENSP00000347942,9606.ENSP00000349131,9606.ENSP00000352288,9606.ENSP00000357265,9606.ENSP00000357362,9606.ENSP00000360858,9606.ENSP00000376345,…	RELT,CBLN1,MAPK14,NECTIN2,CCDC134,FGF2,PDCD6,NRP1,EPHA1,CD109,SMAD1,PLXND1,RET,RSPO3,PLXNB2,SEMA4A,THBS3,OLFM1,GRB2,AGFG1,FJX1,TGFBI,ADGRG1,FAM20A
GO:0052548	Regulation of endopeptidase activity	15	414	0.57	0.0052	9606.ENSP00000215727,9606.ENSP00000223136,9606.ENSP00000223642,9606.ENSP00000243924,9606.ENSP00000264933,9606.ENSP00000269489,9606.ENSP00000287097,9606.ENSP00000311313,9606.ENSP00000324763,9606.ENSP00000340278,9606.ENSP00000347942,9606.ENSP00000352936,9606.ENSP00000376807,9606.ENSP00000416066,9606.ENSP00000427424	SERPIND1,FIS1,C5,PI3,PDCD6,SERPINB13,CD109,CST6,WFIKKN1,PARK7,RET,SPINK5,DPEP1,SERPINA1,TNFAIP8
GO:0065009	Regulation of molecular function	53	3085	0.25	0.0052	9606.ENSP00000215659,9606.ENSP00000215727,9606.ENSP00000215754,9606.ENSP00000220003,9606.ENSP00000222330,9606.ENSP00000223061,9606.ENSP00000223136,9606.ENSP00000223642,9606.ENSP00000229795,9606.ENSP00000243924,9606.ENSP00000251968,9606.ENSP00000252486,9606.ENSP00000256104,9606.ENSP00000264498,9606.ENSP00000264933,9606.ENSP00000265371,9606.ENSP00000269489,9606.ENSP00000275815,9606.ENSP00000287097,…	MAPK12,SERPIND1,MIF,CSK,GSK3A,PCOLCE,FIS1,C5,MAPK14,PI3,TSG101,APOE,FABP4,FGF2,PDCD6,NRP1,SERPINB13,EPHA1,CD109,TLR3,CST6,SWAP70,PLXND1,CPNE1,MET,NQO1,WFIKKN1,PARK7,EPB41,RET,FCGR2B,PLXNB2,SPINK5,GCLM,CTSA,YWHAB,TREM2,GDI2,DPEP1,ANXA4,AGFG1,PTPRJ,TNXB,MST1,DNAJB11,PRPSAP1,SERPINA1,PPIA,TNFAIP8,IL18BP,APOA5,FAM20A,CCL5
GO:0050920	Regulation of chemotaxis	11	227	0.7	0.0056	9606.ENSP00000215754,9606.ENSP00000223642,9606.ENSP00000264498,9606.ENSP00000265371,9606.ENSP00000315630,9606.ENSP00000317272,9606.ENSP00000357265,9606.ENSP00000362205,9606.ENSP00000385451,9606.ENSP00000414287,9606.ENSP00000474412	MIF,C5,FGF2,NRP1,SWAP70,MET,SEMA4A,TREM2,MDK,MST1,CCL5
GO:0044282	Small molecule catabolic process	14	369	0.59	0.0058	9606.ENSP00000222002,9606.ENSP00000252486,9606.ENSP00000260508,9606.ENSP00000270776,9606.ENSP00000296412,9606.ENSP00000296424,9606.ENSP00000318868,9606.ENSP00000340278,9606.ENSP00000361140,9606.ENSP00000369927,9606.ENSP00000376807,9606.ENSP00000438689,9606.ENSP00000466845,9606.ENSP00000466880	SULT2A1,APOE,KYAT3,PGD,ADH5,BDH2,SHMT1,PARK7,AKR1A1,AKR1C3,DPEP1,ACADVL,GCDH,FUT5
GO:1901214	Regulation of neuron death	13	324	0.62	0.0065	9606.ENSP00000222330,9606.ENSP00000252486,9606.ENSP00000261772,9606.ENSP00000265371,9606.ENSP00000317128,9606.ENSP00000319788,9606.ENSP00000340278,9606.ENSP00000351497,9606.ENSP00000359258,9606.ENSP00000362205,9606.ENSP00000376188,9606.ENSP00000385451,9606.ENSP00000474412	GSK3A,APOE,AARS1,NRP1,PLXND1,NQO1,PARK7,FCGR2B,GCLM,TREM2,CRLF1,MDK,CCL5
GO:0051240	Positive regulation of multicellular organismal process	32	1505	0.34	0.0069	9606.ENSP00000215754,9606.ENSP00000219197,9606.ENSP00000222330,9606.ENSP00000223642,9606.ENSP00000229795,9606.ENSP00000252486,9606.ENSP00000256104,9606.ENSP00000264257,9606.ENSP00000264498,9606.ENSP00000264933,9606.ENSP00000265371,9606.ENSP00000275815,9606.ENSP00000296795,9606.ENSP00000305769,9606.ENSP00000317128,9606.ENSP00000339912,9606.ENSP00000340278,9606.ENSP00000347942,9606.ENSP00000352288,…	MIF,CBLN1,GSK3A,C5,MAPK14,APOE,FABP4,IL1RL2,FGF2,PDCD6,NRP1,EPHA1,TLR3,SMAD1,PLXND1,FLRT3,PARK7,RET,PLXNB2,TLR1,ISLR2,FH,SEMA4A,OLFM1,TREM2,CLSTN1,MDK,RAB1A,PTPRJ,MST1,APOA5,SPON2
GO:0002682	Regulation of immune system process	31	1438	0.35	0.0071	9606.ENSP00000215754,9606.ENSP00000220003,9606.ENSP00000223642,9606.ENSP00000229795,9606.ENSP00000244519,9606.ENSP00000252229,9606.ENSP00000252483,9606.ENSP00000252486,9606.ENSP00000253354,9606.ENSP00000264257,9606.ENSP00000270077,9606.ENSP00000291759,9606.ENSP00000296795,9606.ENSP00000315630,9606.ENSP00000327599,9606.ENSP00000329380,9606.ENSP00000340278,9606.ENSP00000341206,9606.ENSP00000351497,…	MIF,CSK,C5,MAPK14,BTN3A3,MICB,NECTIN2,APOE,BPIFB1,IL1RL2,PSG9,LILRA4,TLR3,SWAP70,CLEC4G,GP1BA,PARK7,CHST4,FCGR2B,SPINK5,TLR1,TREM2,MBL2,MFAP4,FGL1,MDK,PTPRJ,MST1,CCL5,SPON2,HSPH1
GO:0032101	Regulation of response to external stimulus	24	964	0.41	0.0071	9606.ENSP00000215754,9606.ENSP00000223642,9606.ENSP00000229795,9606.ENSP00000252229,9606.ENSP00000252483,9606.ENSP00000252486,9606.ENSP00000256104,9606.ENSP00000264257,9606.ENSP00000264498,9606.ENSP00000265371,9606.ENSP00000287097,9606.ENSP00000296795,9606.ENSP00000315630,9606.ENSP00000317272,9606.ENSP00000329380,9606.ENSP00000340278,9606.ENSP00000351497,9606.ENSP00000352936,9606.ENSP00000357265,…	MIF,C5,MAPK14,MICB,NECTIN2,APOE,FABP4,IL1RL2,FGF2,NRP1,CD109,TLR3,SWAP70,MET,GP1BA,PARK7,FCGR2B,SPINK5,SEMA4A,TREM2,MBL2,MDK,MST1,CCL5
GO:0018916	Nitrobenzene metabolic process	3	4	1.89	0.0075	9606.ENSP00000311469,9606.ENSP00000354357,9606.ENSP00000358851	GSTM1,GSTM3,GSTM4
GO:0050776	Regulation of immune response	22	844	0.43	0.0078	9606.ENSP00000220003,9606.ENSP00000223642,9606.ENSP00000229795,9606.ENSP00000244519,9606.ENSP00000252229,9606.ENSP00000252483,9606.ENSP00000252486,9606.ENSP00000253354,9606.ENSP00000270077,9606.ENSP00000291759,9606.ENSP00000296795,9606.ENSP00000327599,9606.ENSP00000340278,9606.ENSP00000351497,9606.ENSP00000352936,9606.ENSP00000354932,9606.ENSP00000362205,9606.ENSP00000363079,9606.ENSP00000378957,…	CSK,C5,MAPK14,BTN3A3,MICB,NECTIN2,APOE,BPIFB1,PSG9,LILRA4,TLR3,CLEC4G,PARK7,FCGR2B,SPINK5,TLR1,TREM2,MBL2,MFAP4,FGL1,PTPRJ,CCL5
GO:0051239	Regulation of multicellular organismal process	48	2749	0.26	0.008	9606.ENSP00000215754,9606.ENSP00000219197,9606.ENSP00000220003,9606.ENSP00000222330,9606.ENSP00000223642,9606.ENSP00000229795,9606.ENSP00000244519,9606.ENSP00000252486,9606.ENSP00000256104,9606.ENSP00000264257,9606.ENSP00000264498,9606.ENSP00000264933,9606.ENSP00000265371,9606.ENSP00000267843,9606.ENSP00000270077,9606.ENSP00000275815,9606.ENSP00000287097,9606.ENSP00000291759,9606.ENSP00000296795,…	MIF,CBLN1,CSK,GSK3A,C5,MAPK14,BTN3A3,APOE,FABP4,IL1RL2,FGF2,PDCD6,NRP1,FGF7,PSG9,EPHA1,CD109,LILRA4,TLR3,SMAD1,PLXND1,MET,CLEC4G,GP1BA,FLRT3,PARK7,EPB41,RET,FCGR2B,PLXNB2,SPINK5,TLR1,ISLR2,FH,SEMA4A,OLFM1,TREM2,APOM,CLSTN1,ANXA4,MDK,TF,RAB1A,PTPRJ,MST1,DNAJB11,APOA5,SPON2
GO:0032102	Negative regulation of response to external stimulus	14	387	0.57	0.0084	9606.ENSP00000215754,9606.ENSP00000223642,9606.ENSP00000229795,9606.ENSP00000252229,9606.ENSP00000252486,9606.ENSP00000264498,9606.ENSP00000265371,9606.ENSP00000287097,9606.ENSP00000329380,9606.ENSP00000351497,9606.ENSP00000352936,9606.ENSP00000357265,9606.ENSP00000362205,9606.ENSP00000385451	MIF,C5,MAPK14,MICB,APOE,FGF2,NRP1,CD109,GP1BA,FCGR2B,SPINK5,SEMA4A,TREM2,MDK
GO:0006955	Immune response	29	1321	0.35	0.0087	9606.ENSP00000215754,9606.ENSP00000220003,9606.ENSP00000223642,9606.ENSP00000243924,9606.ENSP00000244519,9606.ENSP00000244709,9606.ENSP00000252229,9606.ENSP00000253354,9606.ENSP00000264257,9606.ENSP00000270077,9606.ENSP00000291759,9606.ENSP00000296795,9606.ENSP00000296877,9606.ENSP00000315630,9606.ENSP00000327599,9606.ENSP00000341206,9606.ENSP00000351497,9606.ENSP00000354932,9606.ENSP00000357265,…	MIF,CSK,C5,PI3,BTN3A3,TREM1,MICB,BPIFB1,IL1RL2,PSG9,LILRA4,TLR3,LEAP2,SWAP70,CLEC4G,CHST4,FCGR2B,TLR1,SEMA4A,CNPY3,TREM2,MBL2,MFAP4,FGL1,MDK,TF,IL18BP,CCL5,SPON2
GO:0009056	Catabolic process	38	1976	0.3	0.0087	9606.ENSP00000216714,9606.ENSP00000222002,9606.ENSP00000222330,9606.ENSP00000223136,9606.ENSP00000225927,9606.ENSP00000230431,9606.ENSP00000246337,9606.ENSP00000247933,9606.ENSP00000251968,9606.ENSP00000252486,9606.ENSP00000260508,9606.ENSP00000264498,9606.ENSP00000270776,9606.ENSP00000296412,9606.ENSP00000296424,9606.ENSP00000310832,9606.ENSP00000311469,9606.ENSP00000318868,9606.ENSP00000339479,…	APEX1,SULT2A1,GSK3A,FIS1,NAGLU,DNPH1,UROD,IDUA,TSG101,APOE,KYAT3,FGF2,PGD,ADH5,BDH2,CTSF,GSTM1,SHMT1,NT5C2,PARK7,PRDX6,GSTM3,GSTM4,AKR1A1,TREM2,AKR1C3,GGA1,DPEP1,RAB1A,PCYOX1,GGA3,ACADVL,APOA5,LDHA,GCDH,FUT5,AMY2A,ATXN3
GO:0009968	Negative regulation of signal transduction	28	1252	0.36	0.0087	9606.ENSP00000215754,9606.ENSP00000219197,9606.ENSP00000220003,9606.ENSP00000222330,9606.ENSP00000229795,9606.ENSP00000251968,9606.ENSP00000252486,9606.ENSP00000253354,9606.ENSP00000263671,9606.ENSP00000264498,9606.ENSP00000264933,9606.ENSP00000265371,9606.ENSP00000287097,9606.ENSP00000291759,9606.ENSP00000317257,9606.ENSP00000317272,9606.ENSP00000324763,9606.ENSP00000340278,9606.ENSP00000346478,…	MIF,CBLN1,CSK,GSK3A,MAPK14,TSG101,APOE,BPIFB1,CHRDL2,FGF2,PDCD6,NRP1,CD109,LILRA4,CPNE1,MET,WFIKKN1,PARK7,ADAMTSL2,DLK2,FCGR2B,GCLM,YWHAB,TREM2,MDK,PTPRJ,PPIA,CCL5
GO:0009611	Response to wounding	15	444	0.54	0.0089	9606.ENSP00000215727,9606.ENSP00000229795,9606.ENSP00000264498,9606.ENSP00000265371,9606.ENSP00000267843,9606.ENSP00000279227,9606.ENSP00000296411,9606.ENSP00000329380,9606.ENSP00000339912,9606.ENSP00000356771,9606.ENSP00000362205,9606.ENSP00000364935,9606.ENSP00000385451,9606.ENSP00000416066,9606.ENSP00000419425	SERPIND1,MAPK14,FGF2,NRP1,FGF7,FERMT3,METAP1,GP1BA,FLRT3,F5,TREM2,CLIC1,MDK,SERPINA1,PPIA
GO:0051094	Positive regulation of developmental process	29	1332	0.35	0.0097	9606.ENSP00000215659,9606.ENSP00000219197,9606.ENSP00000223136,9606.ENSP00000223642,9606.ENSP00000229795,9606.ENSP00000252486,9606.ENSP00000264257,9606.ENSP00000264498,9606.ENSP00000264933,9606.ENSP00000265371,9606.ENSP00000273395,9606.ENSP00000275815,9606.ENSP00000296795,9606.ENSP00000301391,9606.ENSP00000305769,9606.ENSP00000317128,9606.ENSP00000317257,9606.ENSP00000339912,9606.ENSP00000347942,…	MAPK12,CBLN1,FIS1,C5,MAPK14,APOE,IL1RL2,FGF2,PDCD6,NRP1,BOC,EPHA1,TLR3,CYB5D2,SMAD1,PLXND1,CPNE1,FLRT3,RET,PLXNB2,ISLR2,SEMA4A,OLFM1,TREM2,CLIC1,CLSTN1,MDK,TNXB,MST1
GO:0060429	Epithelium development	25	1069	0.38	0.0112	9606.ENSP00000230431,9606.ENSP00000251968,9606.ENSP00000264498,9606.ENSP00000265371,9606.ENSP00000267843,9606.ENSP00000287097,9606.ENSP00000296424,9606.ENSP00000305769,9606.ENSP00000317128,9606.ENSP00000317272,9606.ENSP00000339912,9606.ENSP00000346478,9606.ENSP00000347942,9606.ENSP00000349131,9606.ENSP00000352288,9606.ENSP00000352936,9606.ENSP00000354213,9606.ENSP00000354357,9606.ENSP00000369927,…	DNPH1,TSG101,FGF2,NRP1,FGF7,CD109,BDH2,SMAD1,PLXND1,MET,FLRT3,ADAMTSL2,RET,RSPO3,PLXNB2,SPINK5,HS3ST3B1,GSTM3,AKR1C3,TNFRSF19,CRLF1,GRB2,ANXA4,MST1,ACADVL
GO:0043603	Cellular amide metabolic process	21	810	0.43	0.0113	9606.ENSP00000261772,9606.ENSP00000290765,9606.ENSP00000296424,9606.ENSP00000305603,9606.ENSP00000311469,9606.ENSP00000318868,9606.ENSP00000336702,9606.ENSP00000339479,9606.ENSP00000340278,9606.ENSP00000354357,9606.ENSP00000355518,9606.ENSP00000358851,9606.ENSP00000359258,9606.ENSP00000361642,9606.ENSP00000364935,9606.ENSP00000376807,9606.ENSP00000434056,9606.ENSP00000466845,9606.ENSP00000466880,…	AARS1,GSTT2B,BDH2,FUT3,GSTM1,SHMT1,EIF5A,NT5C2,PARK7,GSTM3,FH,GSTM4,GCLM,PPCS,CLIC1,DPEP1,EIF1AD,GCDH,FUT5,SARS2,GSS
GO:0009987	Cellular process	166	14826	0.06	0.0121	9606.ENSP00000064780,9606.ENSP00000198536,9606.ENSP00000204679,9606.ENSP00000215659,9606.ENSP00000215754,9606.ENSP00000216714,9606.ENSP00000219197,9606.ENSP00000220003,9606.ENSP00000220478,9606.ENSP00000220496,9606.ENSP00000222002,9606.ENSP00000222330,9606.ENSP00000223136,9606.ENSP00000223642,9606.ENSP00000225927,9606.ENSP00000229795,9606.ENSP00000230431,9606.ENSP00000244519,9606.ENSP00000244709,…	RELT,PILRA,GNPTG,MAPK12,MIF,APEX1,CBLN1,CSK,SCG3,DNAJC17,SULT2A1,GSK3A,FIS1,C5,NAGLU,MAPK14,DNPH1,BTN3A3,TREM1,UROD,OMG,IDUA,TSG101,MICB,NECTIN2,APOE,PGLS,FABP4,RTP4,KYAT3,AARS1,CHRDL2,IL1RL2,FGF2,CP,PDCD6,NRP1,FGF7,SAT2,PSG9,PGD,ACP1,RAB5A,BOC,EPHA1,FERMT3,RPIA,CD109,GSTT2B,HAPLN4,LILRA4,AZGP1,METAP1,ADH5,BDH2,TLR3,PDIA3,RRM1,CYB5D2,FUT3,SMAD1,XXYLT1,GSTM1,SWAP70,PLXND1,CPNE1,MET,SHMT1,NQO1,WFIK…
GO:0002460	Adaptive immune response based on somatic recombination of immune receptors built from immunoglobulin superfamily domains	9	169	0.74	0.0122	9606.ENSP00000223642,9606.ENSP00000244519,9606.ENSP00000270077,9606.ENSP00000315630,9606.ENSP00000327599,9606.ENSP00000351497,9606.ENSP00000357265,9606.ENSP00000363079,9606.ENSP00000434717	C5,BTN3A3,PSG9,SWAP70,CLEC4G,FCGR2B,SEMA4A,MBL2,IL18BP
GO:0035295	Tube development	22	880	0.41	0.0122	9606.ENSP00000229795,9606.ENSP00000252486,9606.ENSP00000255784,9606.ENSP00000264498,9606.ENSP00000264933,9606.ENSP00000265371,9606.ENSP00000267843,9606.ENSP00000275815,9606.ENSP00000305769,9606.ENSP00000317128,9606.ENSP00000317272,9606.ENSP00000346478,9606.ENSP00000347942,9606.ENSP00000349131,9606.ENSP00000352288,9606.ENSP00000354213,9606.ENSP00000357265,9606.ENSP00000376188,9606.ENSP00000405577,…	MAPK14,APOE,CCDC134,FGF2,PDCD6,NRP1,FGF7,EPHA1,SMAD1,PLXND1,MET,ADAMTSL2,RET,RSPO3,PLXNB2,HS3ST3B1,SEMA4A,CRLF1,CLMP,MST1,TGFBI,ADGRG1
GO:0044237	Cellular metabolic process	90	6568	0.15	0.0122	9606.ENSP00000204679,9606.ENSP00000215659,9606.ENSP00000215754,9606.ENSP00000216714,9606.ENSP00000220003,9606.ENSP00000220496,9606.ENSP00000222002,9606.ENSP00000222330,9606.ENSP00000223136,9606.ENSP00000229795,9606.ENSP00000230431,9606.ENSP00000246337,9606.ENSP00000247933,9606.ENSP00000251968,9606.ENSP00000252486,9606.ENSP00000252603,9606.ENSP00000260508,9606.ENSP00000261772,9606.ENSP00000264498,…	GNPTG,MAPK12,MIF,APEX1,CSK,DNAJC17,SULT2A1,GSK3A,FIS1,MAPK14,DNPH1,UROD,IDUA,TSG101,APOE,PGLS,KYAT3,AARS1,FGF2,NRP1,SAT2,PGD,ACP1,EPHA1,RPIA,CD109,GSTT2B,AZGP1,ADH5,BDH2,TLR3,RRM1,FUT3,SMAD1,XXYLT1,GSTM1,SWAP70,MET,SHMT1,NQO1,ADSS1,EIF5A,NT5C2,PARK7,CHST4,PRDX6,EGFLAM,RET,DCLK1,HS3ST3B1,GSTM3,FH,GSTM4,AS3MT,GCLM,AKR1A1,PPCS,TREM2,CLIC1,NUDT2,AKR1C4,AKR1C3,DPEP1,ADH6,ACY1,A4GALT,RAB1A,PCYOX1,PTPRJ…
GO:0051336	Regulation of hydrolase activity	24	1011	0.39	0.0122	9606.ENSP00000215659,9606.ENSP00000215727,9606.ENSP00000223061,9606.ENSP00000223136,9606.ENSP00000223642,9606.ENSP00000243924,9606.ENSP00000264498,9606.ENSP00000264933,9606.ENSP00000269489,9606.ENSP00000275815,9606.ENSP00000287097,9606.ENSP00000311313,9606.ENSP00000317128,9606.ENSP00000317272,9606.ENSP00000324763,9606.ENSP00000340278,9606.ENSP00000347942,9606.ENSP00000352288,9606.ENSP00000352936,…	MAPK12,SERPIND1,PCOLCE,FIS1,C5,PI3,FGF2,PDCD6,SERPINB13,EPHA1,CD109,CST6,PLXND1,MET,WFIKKN1,PARK7,RET,PLXNB2,SPINK5,DPEP1,SERPINA1,TNFAIP8,APOA5,CCL5
GO:0002250	Adaptive immune response	13	359	0.57	0.0133	9606.ENSP00000220003,9606.ENSP00000223642,9606.ENSP00000244519,9606.ENSP00000244709,9606.ENSP00000252229,9606.ENSP00000270077,9606.ENSP00000315630,9606.ENSP00000327599,9606.ENSP00000351497,9606.ENSP00000357265,9606.ENSP00000363079,9606.ENSP00000381133,9606.ENSP00000434717	CSK,C5,BTN3A3,TREM1,MICB,PSG9,SWAP70,CLEC4G,FCGR2B,SEMA4A,MBL2,FGL1,IL18BP
GO:0007596	Blood coagulation	9	173	0.73	0.0135	9606.ENSP00000215727,9606.ENSP00000229795,9606.ENSP00000279227,9606.ENSP00000296411,9606.ENSP00000329380,9606.ENSP00000356771,9606.ENSP00000364935,9606.ENSP00000416066,9606.ENSP00000419425	SERPIND1,MAPK14,FERMT3,METAP1,GP1BA,F5,CLIC1,SERPINA1,PPIA
GO:0009058	Biosynthetic process	44	2506	0.26	0.0135	9606.ENSP00000215754,9606.ENSP00000223061,9606.ENSP00000229795,9606.ENSP00000246337,9606.ENSP00000252486,9606.ENSP00000260508,9606.ENSP00000261772,9606.ENSP00000264498,9606.ENSP00000270776,9606.ENSP00000296424,9606.ENSP00000300738,9606.ENSP00000305603,9606.ENSP00000305769,9606.ENSP00000309640,9606.ENSP00000311469,9606.ENSP00000318868,9606.ENSP00000319788,9606.ENSP00000333019,9606.ENSP00000336702,…	MIF,PCOLCE,MAPK14,UROD,APOE,KYAT3,AARS1,FGF2,PGD,BDH2,RRM1,FUT3,SMAD1,XXYLT1,GSTM1,SHMT1,NQO1,ADSS1,EIF5A,PARK7,CHST4,HS3ST3B1,FH,GSTM4,GCLM,AKR1A1,PPCS,NUDT2,AKR1C4,AKR1C3,A4GALT,PRPSAP1,PLTP,EIF1AD,APOA5,ASIP,GCDH,FUT5,SARS2,ST3GAL6,CHST12,ABO,GSS,HMBS
GO:0048583	Regulation of response to stimulus	61	3931	0.2	0.0135	9606.ENSP00000215754,9606.ENSP00000219197,9606.ENSP00000220003,9606.ENSP00000222330,9606.ENSP00000223136,9606.ENSP00000223642,9606.ENSP00000229795,9606.ENSP00000244519,9606.ENSP00000251968,9606.ENSP00000252229,9606.ENSP00000252483,9606.ENSP00000252486,9606.ENSP00000253354,9606.ENSP00000256104,9606.ENSP00000263671,9606.ENSP00000264257,9606.ENSP00000264498,9606.ENSP00000264933,9606.ENSP00000265371,…	MIF,CBLN1,CSK,GSK3A,FIS1,C5,MAPK14,BTN3A3,TSG101,MICB,NECTIN2,APOE,BPIFB1,FABP4,CHRDL2,IL1RL2,FGF2,PDCD6,NRP1,PSG9,CD109,LILRA4,TLR3,PDIA3,SWAP70,CPNE1,MET,WFIKKN1,CLEC4G,GP1BA,EIF5A,PARK7,FBLN5,ADAMTSL2,RET,RSPO3,DLK2,FCGR2B,SPINK5,TLR1,FH,SEMA4A,GCLM,YWHAB,TREM2,MBL2,GPC5,POSTN,AKR1C3,TNFRSF19,GRB2,MFAP4,FGL1,MDK,PTPRJ,MST1,PPIA,IL18BP,ADGRG1,CCL5,ATXN3
GO:0009607	Response to biotic stimulus	29	1375	0.34	0.0141	9606.ENSP00000215754,9606.ENSP00000223642,9606.ENSP00000229795,9606.ENSP00000243924,9606.ENSP00000244709,9606.ENSP00000253354,9606.ENSP00000256104,9606.ENSP00000259030,9606.ENSP00000264257,9606.ENSP00000291759,9606.ENSP00000296412,9606.ENSP00000296795,9606.ENSP00000296877,9606.ENSP00000336702,9606.ENSP00000351497,9606.ENSP00000353846,9606.ENSP00000354932,9606.ENSP00000361926,9606.ENSP00000362205,…	MIF,C5,MAPK14,PI3,TREM1,BPIFB1,FABP4,RTP4,IL1RL2,LILRA4,ADH5,TLR3,LEAP2,EIF5A,FCGR2B,DCLK1,TLR1,CNPY3,TREM2,MBL2,MFAP4,TF,RAB1A,PTPRJ,IL18BP,RNASE4,FAM20A,CCL5,SPON2
GO:0034308	Primary alcohol metabolic process	7	99	0.86	0.0141	9606.ENSP00000222002,9606.ENSP00000296412,9606.ENSP00000340278,9606.ENSP00000361140,9606.ENSP00000369814,9606.ENSP00000369927,9606.ENSP00000378359	SULT2A1,ADH5,PARK7,AKR1A1,AKR1C4,AKR1C3,ADH6
GO:0071526	Semaphorin-plexin signaling pathway	5	41	1.1	0.0142	9606.ENSP00000265371,9606.ENSP00000317128,9606.ENSP00000317272,9606.ENSP00000352288,9606.ENSP00000357265	NRP1,PLXND1,MET,PLXNB2,SEMA4A
GO:0006979	Response to oxidative stress	13	368	0.56	0.0153	9606.ENSP00000216714,9606.ENSP00000252229,9606.ENSP00000252486,9606.ENSP00000319788,9606.ENSP00000340278,9606.ENSP00000342026,9606.ENSP00000359258,9606.ENSP00000363079,9606.ENSP00000368452,9606.ENSP00000369927,9606.ENSP00000419425,9606.ENSP00000434717,9606.ENSP00000495750	APEX1,MICB,APOE,NQO1,PARK7,PRDX6,GCLM,MBL2,NUDT2,AKR1C3,PPIA,IL18BP,GSS
GO:0010033	Response to organic substance	46	2692	0.25	0.0153	9606.ENSP00000216714,9606.ENSP00000220003,9606.ENSP00000222330,9606.ENSP00000229795,9606.ENSP00000252229,9606.ENSP00000256104,9606.ENSP00000264257,9606.ENSP00000264498,9606.ENSP00000265371,9606.ENSP00000267843,9606.ENSP00000270077,9606.ENSP00000291759,9606.ENSP00000296412,9606.ENSP00000296795,9606.ENSP00000300289,9606.ENSP00000305769,9606.ENSP00000318868,9606.ENSP00000319788,9606.ENSP00000336702,…	APEX1,CSK,GSK3A,MAPK14,MICB,FABP4,IL1RL2,FGF2,NRP1,FGF7,PSG9,LILRA4,ADH5,TLR3,PDIA3,SMAD1,SHMT1,NQO1,EIF5A,FLRT3,PARK7,RET,FCGR2B,GSTM3,TLR1,F5,GCLM,AKR1A1,TREM2,POSTN,AKR1C4,AKR1C3,TNFRSF19,CRLF1,GRB2,ADH6,MDK,PTPRJ,AOC1,IL18BP,ASIP,CCL5,ST3GAL6,SPON2,HSPH1,ATXN3
GO:0044272	Sulfur compound biosynthetic process	8	138	0.78	0.0153	9606.ENSP00000311469,9606.ENSP00000359258,9606.ENSP00000361140,9606.ENSP00000361642,9606.ENSP00000466845,9606.ENSP00000480884,9606.ENSP00000481912,9606.ENSP00000495750	GSTM1,GCLM,AKR1A1,PPCS,GCDH,ST3GAL6,CHST12,GSS
GO:1901137	Carbohydrate derivative biosynthetic process	17	593	0.47	0.0153	9606.ENSP00000300738,9606.ENSP00000305603,9606.ENSP00000309640,9606.ENSP00000318868,9606.ENSP00000333019,9606.ENSP00000341206,9606.ENSP00000354213,9606.ENSP00000361140,9606.ENSP00000361642,9606.ENSP00000368452,9606.ENSP00000384794,9606.ENSP00000414624,9606.ENSP00000466845,9606.ENSP00000466880,9606.ENSP00000480884,9606.ENSP00000481912,9606.ENSP00000483018	RRM1,FUT3,XXYLT1,SHMT1,ADSS1,CHST4,HS3ST3B1,AKR1A1,PPCS,NUDT2,A4GALT,PRPSAP1,GCDH,FUT5,ST3GAL6,CHST12,ABO
GO:0006807	Nitrogen compound metabolic process	90	6643	0.15	0.0161	9606.ENSP00000204679,9606.ENSP00000215659,9606.ENSP00000216714,9606.ENSP00000220003,9606.ENSP00000220496,9606.ENSP00000222002,9606.ENSP00000222330,9606.ENSP00000223061,9606.ENSP00000225927,9606.ENSP00000229795,9606.ENSP00000230431,9606.ENSP00000243924,9606.ENSP00000246337,9606.ENSP00000247933,9606.ENSP00000251968,9606.ENSP00000252486,9606.ENSP00000260508,9606.ENSP00000261772,9606.ENSP00000264498,…	GNPTG,MAPK12,APEX1,CSK,DNAJC17,SULT2A1,GSK3A,PCOLCE,NAGLU,MAPK14,DNPH1,PI3,UROD,IDUA,TSG101,APOE,KYAT3,AARS1,FGF2,NRP1,SAT2,ACP1,EPHA1,CD109,GSTT2B,AZGP1,METAP1,ADH5,BDH2,TLR3,RRM1,FUT3,SMAD1,XXYLT1,CTSF,GSTM1,SWAP70,CPNE1,MET,SHMT1,NQO1,GP1BA,ADSS1,EIF5A,NT5C2,PARK7,CHST4,EGFLAM,RET,DCLK1,HS3ST3B1,GSTM3,FH,F5,GSTM4,GCLM,AKR1A1,CTSA,PPCS,MBL2,CLIC1,APOM,NUDT2,AKR1C4,AKR1C3,GGA1,DPEP1,ACY1,A4GALT,…
GO:0006954	Inflammatory response	16	538	0.49	0.0161	9606.ENSP00000215754,9606.ENSP00000223642,9606.ENSP00000244709,9606.ENSP00000264257,9606.ENSP00000296795,9606.ENSP00000305769,9606.ENSP00000340278,9606.ENSP00000341206,9606.ENSP00000351497,9606.ENSP00000354932,9606.ENSP00000362205,9606.ENSP00000363079,9606.ENSP00000376807,9606.ENSP00000385451,9606.ENSP00000416066,9606.ENSP00000474412	MIF,C5,TREM1,IL1RL2,TLR3,SMAD1,PARK7,CHST4,FCGR2B,TLR1,TREM2,MBL2,DPEP1,MDK,SERPINA1,CCL5
GO:0051716	Cellular response to stimulus	87	6357	0.15	0.0161	9606.ENSP00000198536,9606.ENSP00000215659,9606.ENSP00000215754,9606.ENSP00000216714,9606.ENSP00000220003,9606.ENSP00000222002,9606.ENSP00000222330,9606.ENSP00000223136,9606.ENSP00000223642,9606.ENSP00000229795,9606.ENSP00000244519,9606.ENSP00000244709,9606.ENSP00000247271,9606.ENSP00000252229,9606.ENSP00000252486,9606.ENSP00000256104,9606.ENSP00000264257,9606.ENSP00000264498,9606.ENSP00000264933,…	PILRA,MAPK12,MIF,APEX1,CSK,SULT2A1,GSK3A,FIS1,C5,MAPK14,BTN3A3,TREM1,OMG,MICB,APOE,FABP4,IL1RL2,FGF2,PDCD6,NRP1,FGF7,PSG9,RAB5A,BOC,EPHA1,FERMT3,LILRA4,ADH5,TLR3,PDIA3,RRM1,SMAD1,GSTM1,PLXND1,CPNE1,MET,SHMT1,NQO1,GP1BA,EIF5A,FLRT3,PARK7,PRDX6,RET,RSPO3,FCGR2B,PLXNB2,DCLK1,GSTM3,TLR1,FH,SEMA4A,GSTM4,AS3MT,GCLM,OLFM1,AKR1A1,YWHAB,TREM2,MBL2,CLIC1,APOM,NUDT2,POSTN,GDI2,AKR1C4,AKR1C3,TNFRSF19,CRLF1,G…
GO:0070527	Platelet aggregation	5	43	1.08	0.0161	9606.ENSP00000279227,9606.ENSP00000296411,9606.ENSP00000329380,9606.ENSP00000364935,9606.ENSP00000419425	FERMT3,METAP1,GP1BA,CLIC1,PPIA
GO:0051707	Response to other organism	28	1328	0.34	0.0168	9606.ENSP00000215754,9606.ENSP00000223642,9606.ENSP00000229795,9606.ENSP00000243924,9606.ENSP00000244709,9606.ENSP00000253354,9606.ENSP00000256104,9606.ENSP00000259030,9606.ENSP00000264257,9606.ENSP00000291759,9606.ENSP00000296412,9606.ENSP00000296795,9606.ENSP00000296877,9606.ENSP00000336702,9606.ENSP00000351497,9606.ENSP00000353846,9606.ENSP00000354932,9606.ENSP00000361926,9606.ENSP00000362205,…	MIF,C5,MAPK14,PI3,TREM1,BPIFB1,FABP4,RTP4,IL1RL2,LILRA4,ADH5,TLR3,LEAP2,EIF5A,FCGR2B,DCLK1,TLR1,CNPY3,TREM2,MBL2,MFAP4,TF,RAB1A,IL18BP,RNASE4,FAM20A,CCL5,SPON2
GO:0009617	Response to bacterium	18	663	0.45	0.0171	9606.ENSP00000229795,9606.ENSP00000243924,9606.ENSP00000244709,9606.ENSP00000256104,9606.ENSP00000296412,9606.ENSP00000296795,9606.ENSP00000296877,9606.ENSP00000351497,9606.ENSP00000354932,9606.ENSP00000362205,9606.ENSP00000363079,9606.ENSP00000385834,9606.ENSP00000387286,9606.ENSP00000434717,9606.ENSP00000452245,9606.ENSP00000468308,9606.ENSP00000474412,9606.ENSP00000483599	MAPK14,PI3,TREM1,FABP4,ADH5,TLR3,LEAP2,FCGR2B,TLR1,TREM2,MBL2,TF,RAB1A,IL18BP,RNASE4,FAM20A,CCL5,SPON2
GO:0009636	Response to toxic substance	10	229	0.65	0.0175	9606.ENSP00000252486,9606.ENSP00000296412,9606.ENSP00000311469,9606.ENSP00000319788,9606.ENSP00000340278,9606.ENSP00000342026,9606.ENSP00000354357,9606.ENSP00000361140,9606.ENSP00000365081,9606.ENSP00000474412	APOE,ADH5,GSTM1,NQO1,PARK7,PRDX6,GSTM3,AKR1A1,APOM,CCL5
GO:1901566	Organonitrogen compound biosynthetic process	28	1338	0.33	0.0183	9606.ENSP00000246337,9606.ENSP00000252486,9606.ENSP00000261772,9606.ENSP00000296424,9606.ENSP00000305603,9606.ENSP00000309640,9606.ENSP00000311469,9606.ENSP00000318868,9606.ENSP00000333019,9606.ENSP00000336702,9606.ENSP00000341206,9606.ENSP00000354213,9606.ENSP00000355518,9606.ENSP00000359258,9606.ENSP00000361140,9606.ENSP00000361642,9606.ENSP00000368452,9606.ENSP00000384794,9606.ENSP00000414624,…	UROD,APOE,AARS1,BDH2,FUT3,XXYLT1,GSTM1,SHMT1,ADSS1,EIF5A,CHST4,HS3ST3B1,FH,GCLM,AKR1A1,PPCS,NUDT2,A4GALT,PRPSAP1,EIF1AD,GCDH,FUT5,SARS2,ST3GAL6,CHST12,ABO,GSS,HMBS
GO:0032501	Multicellular organismal process	88	6490	0.15	0.0187	9606.ENSP00000215727,9606.ENSP00000219197,9606.ENSP00000220003,9606.ENSP00000222330,9606.ENSP00000223642,9606.ENSP00000225927,9606.ENSP00000229795,9606.ENSP00000243924,9606.ENSP00000247271,9606.ENSP00000252483,9606.ENSP00000252486,9606.ENSP00000255784,9606.ENSP00000259030,9606.ENSP00000261772,9606.ENSP00000263671,9606.ENSP00000264498,9606.ENSP00000264933,9606.ENSP00000265371,9606.ENSP00000267843,…	SERPIND1,CBLN1,CSK,GSK3A,C5,NAGLU,MAPK14,PI3,OMG,NECTIN2,APOE,CCDC134,RTP4,AARS1,CHRDL2,FGF2,PDCD6,NRP1,FGF7,PSG9,RAB5A,BOC,EPHA1,FERMT3,CD109,HAPLN4,AZGP1,METAP1,ADH5,TLR3,CYB5D2,SMAD1,EDDM3A,SWAP70,PLXND1,CPNE1,MET,WFIKKN1,CLEC4G,GP1BA,FLRT3,PARK7,ADAMTSL2,RET,RSPO3,FCGR2B,PLXNB2,SPINK5,DCLK1,HS3ST3B1,GSTM3,ISLR2,FH,F5,SEMA4A,THBS3,GCLM,OLFM1,PPCS,TREM2,CLIC1,APOM,AKR1C3,TNFRSF19,CRLF1,CCDC50,G…
GO:0048518	Positive regulation of biological process	85	6207	0.15	0.0189	9606.ENSP00000215659,9606.ENSP00000215754,9606.ENSP00000216714,9606.ENSP00000219197,9606.ENSP00000220003,9606.ENSP00000222330,9606.ENSP00000223061,9606.ENSP00000223136,9606.ENSP00000223642,9606.ENSP00000229795,9606.ENSP00000230431,9606.ENSP00000244519,9606.ENSP00000251968,9606.ENSP00000252229,9606.ENSP00000252483,9606.ENSP00000252486,9606.ENSP00000256104,9606.ENSP00000264257,9606.ENSP00000264498,…	MAPK12,MIF,APEX1,CBLN1,CSK,GSK3A,PCOLCE,FIS1,C5,MAPK14,DNPH1,BTN3A3,TSG101,MICB,NECTIN2,APOE,FABP4,IL1RL2,FGF2,PDCD6,NRP1,FGF7,PSG9,RAB5A,BOC,EPHA1,FERMT3,TLR3,PDIA3,RRM1,CYB5D2,FUT3,SMAD1,SWAP70,PLXND1,CPNE1,MET,NQO1,CLEC4G,GP1BA,EIF5A,FLRT3,PARK7,CHST4,PRDX6,EPB41,EGFLAM,RET,RSPO3,FCGR2B,PLXNB2,TLR1,ISLR2,FH,SEMA4A,OLFM1,TREM2,MBL2,CLIC1,GPC5,CLSTN1,AKR1C3,GGA1,TNFRSF19,CRLF1,GRB2,MFAP4,MDK,TF,…
GO:0006629	Lipid metabolic process	26	1210	0.35	0.021	9606.ENSP00000215754,9606.ENSP00000222002,9606.ENSP00000229795,9606.ENSP00000252486,9606.ENSP00000264498,9606.ENSP00000296412,9606.ENSP00000296424,9606.ENSP00000305603,9606.ENSP00000311469,9606.ENSP00000317257,9606.ENSP00000342026,9606.ENSP00000358851,9606.ENSP00000361140,9606.ENSP00000369814,9606.ENSP00000369927,9606.ENSP00000376807,9606.ENSP00000378359,9606.ENSP00000384794,9606.ENSP00000407685,…	MIF,SULT2A1,MAPK14,APOE,FGF2,ADH5,BDH2,FUT3,GSTM1,CPNE1,PRDX6,GSTM4,AKR1A1,AKR1C4,AKR1C3,DPEP1,ADH6,A4GALT,TNXB,PLTP,ACADVL,APOA5,GCDH,FUT5,ST3GAL6,ABO
GO:0006796	Phosphate-containing compound metabolic process	35	1877	0.28	0.0214	9606.ENSP00000204679,9606.ENSP00000215659,9606.ENSP00000220003,9606.ENSP00000222002,9606.ENSP00000222330,9606.ENSP00000229795,9606.ENSP00000230431,9606.ENSP00000252603,9606.ENSP00000264498,9606.ENSP00000265371,9606.ENSP00000270776,9606.ENSP00000272067,9606.ENSP00000275815,9606.ENSP00000283646,9606.ENSP00000287097,9606.ENSP00000296795,9606.ENSP00000300738,9606.ENSP00000305769,9606.ENSP00000317272,…	GNPTG,MAPK12,CSK,SULT2A1,GSK3A,MAPK14,DNPH1,PGLS,FGF2,NRP1,PGD,ACP1,EPHA1,RPIA,CD109,TLR3,RRM1,SMAD1,MET,SHMT1,ADSS1,NT5C2,PARK7,PRDX6,RET,DCLK1,AKR1A1,PPCS,NUDT2,PTPRJ,MST1,PRPSAP1,APOA5,LDHA,GCDH
GO:0009100	Glycoprotein metabolic process	12	338	0.56	0.0224	9606.ENSP00000204679,9606.ENSP00000247933,9606.ENSP00000305603,9606.ENSP00000309640,9606.ENSP00000340278,9606.ENSP00000341206,9606.ENSP00000346964,9606.ENSP00000354213,9606.ENSP00000466880,9606.ENSP00000480884,9606.ENSP00000481912,9606.ENSP00000483018	GNPTG,IDUA,FUT3,XXYLT1,PARK7,CHST4,EGFLAM,HS3ST3B1,FUT5,ST3GAL6,CHST12,ABO
GO:0045765	Regulation of angiogenesis	11	288	0.6	0.0226	9606.ENSP00000223642,9606.ENSP00000264498,9606.ENSP00000264933,9606.ENSP00000265371,9606.ENSP00000275815,9606.ENSP00000296795,9606.ENSP00000305769,9606.ENSP00000317128,9606.ENSP00000352936,9606.ENSP00000357265,9606.ENSP00000385451	C5,FGF2,PDCD6,NRP1,EPHA1,TLR3,SMAD1,PLXND1,SPINK5,SEMA4A,MDK
GO:0048731	System development	59	3867	0.2	0.0226	9606.ENSP00000219197,9606.ENSP00000220003,9606.ENSP00000222330,9606.ENSP00000225927,9606.ENSP00000229795,9606.ENSP00000247271,9606.ENSP00000252486,9606.ENSP00000255784,9606.ENSP00000261772,9606.ENSP00000263671,9606.ENSP00000264498,9606.ENSP00000264933,9606.ENSP00000265371,9606.ENSP00000267843,9606.ENSP00000270077,9606.ENSP00000273395,9606.ENSP00000275815,9606.ENSP00000287097,9606.ENSP00000291481,…	CBLN1,CSK,GSK3A,NAGLU,MAPK14,OMG,APOE,CCDC134,AARS1,CHRDL2,FGF2,PDCD6,NRP1,FGF7,PSG9,BOC,EPHA1,CD109,HAPLN4,TLR3,CYB5D2,SMAD1,SWAP70,PLXND1,CPNE1,MET,WFIKKN1,CLEC4G,GP1BA,FLRT3,ADAMTSL2,RET,RSPO3,FCGR2B,PLXNB2,SPINK5,DCLK1,HS3ST3B1,GSTM3,ISLR2,SEMA4A,THBS3,OLFM1,TREM2,AKR1C3,CRLF1,GRB2,FGL1,MDK,TF,PTPRJ,FJX1,CLMP,TGFBI,PPIA,LDHA,ADGRG1,GSS,ATXN3
GO:0048519	Negative regulation of biological process	75	5313	0.16	0.0228	9606.ENSP00000215659,9606.ENSP00000215727,9606.ENSP00000215754,9606.ENSP00000216714,9606.ENSP00000219197,9606.ENSP00000220003,9606.ENSP00000220496,9606.ENSP00000222330,9606.ENSP00000223136,9606.ENSP00000223642,9606.ENSP00000229795,9606.ENSP00000243924,9606.ENSP00000251968,9606.ENSP00000252229,9606.ENSP00000252486,9606.ENSP00000253354,9606.ENSP00000256104,9606.ENSP00000261772,9606.ENSP00000263671,…	MAPK12,SERPIND1,MIF,APEX1,CBLN1,CSK,DNAJC17,GSK3A,FIS1,C5,MAPK14,PI3,TSG101,MICB,APOE,BPIFB1,FABP4,AARS1,CHRDL2,FGF2,PDCD6,NRP1,SERPINB13,PSG9,EPHA1,CD109,LILRA4,AZGP1,TLR3,SMAD1,CST6,SWAP70,PLXND1,CPNE1,MET,SHMT1,NQO1,WFIKKN1,CLEC4G,GP1BA,PARK7,ADAMTSL2,DLK2,FCGR2B,PLXNB2,SPINK5,DCLK1,FH,SEMA4A,GCLM,OLFM1,CTSA,YWHAB,TREM2,MBL2,APOM,GDI2,AKR1C3,CRLF1,DPEP1,ANXA4,FGL1,MDK,PTPRJ,MST1,DNAJB11,SERPIN…
GO:0051897	Positive regulation of protein kinase B signaling	7	113	0.81	0.0228	9606.ENSP00000264498,9606.ENSP00000317257,9606.ENSP00000317272,9606.ENSP00000340278,9606.ENSP00000347942,9606.ENSP00000369927,9606.ENSP00000400010	FGF2,CPNE1,MET,PARK7,RET,AKR1C3,PTPRJ
GO:0043524	Negative regulation of neuron apoptotic process	8	153	0.73	0.0235	9606.ENSP00000252486,9606.ENSP00000261772,9606.ENSP00000265371,9606.ENSP00000317128,9606.ENSP00000340278,9606.ENSP00000359258,9606.ENSP00000376188,9606.ENSP00000385451	APOE,AARS1,NRP1,PLXND1,PARK7,GCLM,CRLF1,MDK
GO:0001775	Cell activation	18	693	0.43	0.0245	9606.ENSP00000229795,9606.ENSP00000252229,9606.ENSP00000279227,9606.ENSP00000296411,9606.ENSP00000296795,9606.ENSP00000315630,9606.ENSP00000327599,9606.ENSP00000329380,9606.ENSP00000351497,9606.ENSP00000354932,9606.ENSP00000357265,9606.ENSP00000359258,9606.ENSP00000362205,9606.ENSP00000364935,9606.ENSP00000385451,9606.ENSP00000400010,9606.ENSP00000419425,9606.ENSP00000474412	MAPK14,MICB,FERMT3,METAP1,TLR3,SWAP70,CLEC4G,GP1BA,FCGR2B,TLR1,SEMA4A,GCLM,TREM2,CLIC1,MDK,PTPRJ,PPIA,CCL5
GO:0030203	Glycosaminoglycan metabolic process	7	115	0.8	0.0245	9606.ENSP00000225927,9606.ENSP00000247933,9606.ENSP00000264498,9606.ENSP00000346964,9606.ENSP00000354213,9606.ENSP00000480884,9606.ENSP00000481912	NAGLU,IDUA,FGF2,EGFLAM,HS3ST3B1,ST3GAL6,CHST12
GO:0044597	Daunorubicin metabolic process	3	9	1.54	0.0245	9606.ENSP00000361140,9606.ENSP00000369814,9606.ENSP00000369927	AKR1A1,AKR1C4,AKR1C3
GO:0110095	Cellular detoxification of aldehyde	3	9	1.54	0.0245	9606.ENSP00000296412,9606.ENSP00000340278,9606.ENSP00000361140	ADH5,PARK7,AKR1A1
GO:1901575	Organic substance catabolic process	32	1686	0.29	0.0279	9606.ENSP00000216714,9606.ENSP00000222002,9606.ENSP00000222330,9606.ENSP00000225927,9606.ENSP00000230431,9606.ENSP00000246337,9606.ENSP00000247933,9606.ENSP00000251968,9606.ENSP00000252486,9606.ENSP00000260508,9606.ENSP00000264498,9606.ENSP00000270776,9606.ENSP00000296412,9606.ENSP00000296424,9606.ENSP00000310832,9606.ENSP00000318868,9606.ENSP00000339479,9606.ENSP00000340278,9606.ENSP00000342026,…	APEX1,SULT2A1,GSK3A,NAGLU,DNPH1,UROD,IDUA,TSG101,APOE,KYAT3,FGF2,PGD,ADH5,BDH2,CTSF,SHMT1,NT5C2,PARK7,PRDX6,AKR1A1,AKR1C3,GGA1,DPEP1,PCYOX1,GGA3,ACADVL,APOA5,LDHA,GCDH,FUT5,AMY2A,ATXN3
GO:0065008	Regulation of biological quality	56	3654	0.2	0.0286	9606.ENSP00000215727,9606.ENSP00000216714,9606.ENSP00000219197,9606.ENSP00000220003,9606.ENSP00000222002,9606.ENSP00000222330,9606.ENSP00000223136,9606.ENSP00000229795,9606.ENSP00000252486,9606.ENSP00000256104,9606.ENSP00000261772,9606.ENSP00000264613,9606.ENSP00000265371,9606.ENSP00000273047,9606.ENSP00000279227,9606.ENSP00000292401,9606.ENSP00000296411,9606.ENSP00000296412,9606.ENSP00000296424,…	SERPIND1,APEX1,CBLN1,CSK,SULT2A1,GSK3A,FIS1,MAPK14,APOE,FABP4,AARS1,CP,NRP1,RAB5A,FERMT3,AZGP1,METAP1,ADH5,BDH2,SMAD1,SWAP70,MET,NQO1,GP1BA,FLRT3,PARK7,PRDX6,RET,FCGR2B,ISLR2,FH,F5,SEMA4A,GCLM,OLFM1,CTSA,TREM2,CLIC1,APOM,CLSTN1,AKR1C4,AKR1C3,GRB2,ADH6,TF,RAB1A,PTPRJ,SERPINA1,PPIA,CALCB,GGA3,ACADVL,APOA5,ADGRG1,FAM20A,CCL5
GO:0044344	Cellular response to fibroblast growth factor stimulus	6	84	0.87	0.0297	9606.ENSP00000264498,9606.ENSP00000267843,9606.ENSP00000339912,9606.ENSP00000359258,9606.ENSP00000376345,9606.ENSP00000474412	FGF2,FGF7,FLRT3,GCLM,GRB2,CCL5
GO:0044598	Doxorubicin metabolic process	3	10	1.49	0.0297	9606.ENSP00000361140,9606.ENSP00000369814,9606.ENSP00000369927	AKR1A1,AKR1C4,AKR1C3
GO:0042537	Benzene-containing compound metabolic process	4	28	1.17	0.0299	9606.ENSP00000260508,9606.ENSP00000311469,9606.ENSP00000354357,9606.ENSP00000358851	KYAT3,GSTM1,GSTM3,GSTM4
GO:0061138	Morphogenesis of a branching epithelium	8	162	0.71	0.03	9606.ENSP00000264498,9606.ENSP00000265371,9606.ENSP00000267843,9606.ENSP00000317128,9606.ENSP00000317272,9606.ENSP00000349131,9606.ENSP00000354213,9606.ENSP00000376345	FGF2,NRP1,FGF7,PLXND1,MET,RSPO3,HS3ST3B1,GRB2
GO:0019220	Regulation of phosphate metabolic process	28	1405	0.31	0.0313	9606.ENSP00000215754,9606.ENSP00000220003,9606.ENSP00000222330,9606.ENSP00000223136,9606.ENSP00000251968,9606.ENSP00000252486,9606.ENSP00000256104,9606.ENSP00000264498,9606.ENSP00000265371,9606.ENSP00000267843,9606.ENSP00000275815,9606.ENSP00000287097,9606.ENSP00000296795,9606.ENSP00000315630,9606.ENSP00000317272,9606.ENSP00000340278,9606.ENSP00000347942,9606.ENSP00000352288,9606.ENSP00000361930,…	MIF,CSK,GSK3A,FIS1,TSG101,APOE,FABP4,FGF2,NRP1,FGF7,EPHA1,CD109,TLR3,SWAP70,MET,PARK7,RET,PLXNB2,YWHAB,TREM2,CRLF1,TF,PTPRJ,TNXB,MST1,PPIA,FAM20A,CCL5
GO:0044403	Biological process involved in symbiotic interaction	10	257	0.6	0.0323	9606.ENSP00000244709,9606.ENSP00000251968,9606.ENSP00000252483,9606.ENSP00000252486,9606.ENSP00000265371,9606.ENSP00000273047,9606.ENSP00000327599,9606.ENSP00000363079,9606.ENSP00000419425,9606.ENSP00000474412	TREM1,TSG101,NECTIN2,APOE,NRP1,RAB5A,CLEC4G,MBL2,PPIA,CCL5
GO:0034369	Plasma lipoprotein particle remodeling	4	29	1.15	0.0325	9606.ENSP00000252486,9606.ENSP00000365081,9606.ENSP00000417138,9606.ENSP00000445002	APOE,APOM,PLTP,APOA5
GO:0044255	Cellular lipid metabolic process	21	918	0.37	0.0333	9606.ENSP00000215754,9606.ENSP00000229795,9606.ENSP00000252486,9606.ENSP00000264498,9606.ENSP00000296412,9606.ENSP00000296424,9606.ENSP00000305603,9606.ENSP00000311469,9606.ENSP00000342026,9606.ENSP00000358851,9606.ENSP00000369814,9606.ENSP00000369927,9606.ENSP00000378359,9606.ENSP00000384794,9606.ENSP00000407685,9606.ENSP00000438689,9606.ENSP00000445002,9606.ENSP00000466845,9606.ENSP00000466880,…	MIF,MAPK14,APOE,FGF2,ADH5,BDH2,FUT3,GSTM1,PRDX6,GSTM4,AKR1C4,AKR1C3,ADH6,A4GALT,TNXB,ACADVL,APOA5,GCDH,FUT5,ST3GAL6,ABO
GO:0045766	Positive regulation of angiogenesis	8	166	0.7	0.0333	9606.ENSP00000223642,9606.ENSP00000264498,9606.ENSP00000264933,9606.ENSP00000265371,9606.ENSP00000275815,9606.ENSP00000296795,9606.ENSP00000305769,9606.ENSP00000385451	C5,FGF2,PDCD6,NRP1,EPHA1,TLR3,SMAD1,MDK
GO:0051896	Regulation of protein kinase B signaling	8	166	0.7	0.0333	9606.ENSP00000264498,9606.ENSP00000264933,9606.ENSP00000317257,9606.ENSP00000317272,9606.ENSP00000340278,9606.ENSP00000347942,9606.ENSP00000369927,9606.ENSP00000400010	FGF2,PDCD6,CPNE1,MET,PARK7,RET,AKR1C3,PTPRJ
GO:0033632	Regulation of cell-cell adhesion mediated by integrin	3	11	1.45	0.0336	9606.ENSP00000279227,9606.ENSP00000315630,9606.ENSP00000474412	FERMT3,SWAP70,CCL5
GO:0043067	Regulation of programmed cell death	29	1492	0.3	0.0336	9606.ENSP00000215754,9606.ENSP00000216714,9606.ENSP00000222330,9606.ENSP00000223136,9606.ENSP00000252486,9606.ENSP00000261772,9606.ENSP00000264498,9606.ENSP00000265371,9606.ENSP00000269489,9606.ENSP00000296795,9606.ENSP00000300289,9606.ENSP00000317128,9606.ENSP00000317272,9606.ENSP00000319788,9606.ENSP00000336702,9606.ENSP00000340278,9606.ENSP00000347942,9606.ENSP00000359258,9606.ENSP00000360858,…	MIF,APEX1,GSK3A,FIS1,APOE,AARS1,FGF2,NRP1,SERPINB13,TLR3,PDIA3,PLXND1,MET,NQO1,EIF5A,PARK7,RET,GCLM,OLFM1,TREM2,AKR1C3,CRLF1,DPEP1,ANXA4,MDK,MST1,PPIA,TNFAIP8,CCL5
GO:1901615	Organic hydroxy compound metabolic process	14	478	0.48	0.0338	9606.ENSP00000222002,9606.ENSP00000252486,9606.ENSP00000264498,9606.ENSP00000296412,9606.ENSP00000319788,9606.ENSP00000340278,9606.ENSP00000361140,9606.ENSP00000369814,9606.ENSP00000369927,9606.ENSP00000378359,9606.ENSP00000417138,9606.ENSP00000445002,9606.ENSP00000445175,9606.ENSP00000454804	SULT2A1,APOE,FGF2,ADH5,NQO1,PARK7,AKR1A1,AKR1C4,AKR1C3,ADH6,PLTP,APOA5,LDHA,ASIP
GO:0022407	Regulation of cell-cell adhesion	14	480	0.48	0.0345	9606.ENSP00000220003,9606.ENSP00000229795,9606.ENSP00000264257,9606.ENSP00000279227,9606.ENSP00000305603,9606.ENSP00000315630,9606.ENSP00000327599,9606.ENSP00000329380,9606.ENSP00000341206,9606.ENSP00000351497,9606.ENSP00000381133,9606.ENSP00000385451,9606.ENSP00000474412,9606.ENSP00000487365	CSK,MAPK14,IL1RL2,FERMT3,FUT3,SWAP70,CLEC4G,GP1BA,CHST4,FCGR2B,FGL1,MDK,CCL5,HSPH1
GO:0042180	Cellular ketone metabolic process	6	89	0.84	0.0345	9606.ENSP00000260508,9606.ENSP00000319788,9606.ENSP00000340278,9606.ENSP00000361140,9606.ENSP00000369814,9606.ENSP00000369927	KYAT3,NQO1,PARK7,AKR1A1,AKR1C4,AKR1C3
GO:1901576	Organic substance biosynthetic process	41	2438	0.24	0.0348	9606.ENSP00000215754,9606.ENSP00000229795,9606.ENSP00000246337,9606.ENSP00000252486,9606.ENSP00000261772,9606.ENSP00000264498,9606.ENSP00000270776,9606.ENSP00000296424,9606.ENSP00000300738,9606.ENSP00000305603,9606.ENSP00000305769,9606.ENSP00000309640,9606.ENSP00000311469,9606.ENSP00000318868,9606.ENSP00000333019,9606.ENSP00000336702,9606.ENSP00000340278,9606.ENSP00000341206,9606.ENSP00000354213,…	MIF,MAPK14,UROD,APOE,AARS1,FGF2,PGD,BDH2,RRM1,FUT3,SMAD1,XXYLT1,GSTM1,SHMT1,ADSS1,EIF5A,PARK7,CHST4,HS3ST3B1,FH,GSTM4,GCLM,AKR1A1,PPCS,NUDT2,AKR1C4,AKR1C3,A4GALT,PRPSAP1,PLTP,EIF1AD,APOA5,ASIP,GCDH,FUT5,SARS2,ST3GAL6,CHST12,ABO,GSS,HMBS
GO:0010563	Negative regulation of phosphorus metabolic process	13	425	0.5	0.0358	9606.ENSP00000220003,9606.ENSP00000222330,9606.ENSP00000223136,9606.ENSP00000251968,9606.ENSP00000252486,9606.ENSP00000256104,9606.ENSP00000275815,9606.ENSP00000287097,9606.ENSP00000315630,9606.ENSP00000340278,9606.ENSP00000361930,9606.ENSP00000400010,9606.ENSP00000419425	CSK,GSK3A,FIS1,TSG101,APOE,FABP4,EPHA1,CD109,SWAP70,PARK7,YWHAB,PTPRJ,PPIA
GO:0044238	Primary metabolic process	93	7156	0.13	0.0358	9606.ENSP00000204679,9606.ENSP00000215659,9606.ENSP00000215754,9606.ENSP00000216714,9606.ENSP00000220003,9606.ENSP00000220496,9606.ENSP00000222002,9606.ENSP00000222330,9606.ENSP00000223061,9606.ENSP00000229795,9606.ENSP00000230431,9606.ENSP00000243924,9606.ENSP00000247933,9606.ENSP00000251968,9606.ENSP00000252486,9606.ENSP00000252603,9606.ENSP00000260508,9606.ENSP00000261772,9606.ENSP00000264498,…	GNPTG,MAPK12,MIF,APEX1,CSK,DNAJC17,SULT2A1,GSK3A,PCOLCE,MAPK14,DNPH1,PI3,IDUA,TSG101,APOE,PGLS,KYAT3,AARS1,FGF2,NRP1,PGD,ACP1,EPHA1,RPIA,CD109,AZGP1,METAP1,ADH5,BDH2,TLR3,RRM1,FUT3,SMAD1,XXYLT1,CTSF,GSTM1,SWAP70,CPNE1,MET,SHMT1,GP1BA,ADSS1,EIF5A,NT5C2,PARK7,CHST4,PRDX6,EGFLAM,RET,DCLK1,HS3ST3B1,AMY2B,FH,F5,GSTM4,GCLM,AKR1A1,CTSA,PPCS,MBL2,APOM,NUDT2,AKR1C4,AKR1C3,GGA1,DPEP1,ADH6,ACY1,A4GALT,PCYOX…
GO:0044249	Cellular biosynthetic process	40	2362	0.24	0.0358	9606.ENSP00000215754,9606.ENSP00000229795,9606.ENSP00000246337,9606.ENSP00000252486,9606.ENSP00000261772,9606.ENSP00000264498,9606.ENSP00000296424,9606.ENSP00000300738,9606.ENSP00000305603,9606.ENSP00000305769,9606.ENSP00000309640,9606.ENSP00000311469,9606.ENSP00000318868,9606.ENSP00000319788,9606.ENSP00000333019,9606.ENSP00000336702,9606.ENSP00000340278,9606.ENSP00000341206,9606.ENSP00000354213,…	MIF,MAPK14,UROD,APOE,AARS1,FGF2,BDH2,RRM1,FUT3,SMAD1,XXYLT1,GSTM1,SHMT1,NQO1,ADSS1,EIF5A,PARK7,CHST4,HS3ST3B1,FH,GSTM4,GCLM,AKR1A1,PPCS,NUDT2,AKR1C4,AKR1C3,A4GALT,PRPSAP1,PLTP,EIF1AD,ASIP,GCDH,FUT5,SARS2,ST3GAL6,CHST12,ABO,GSS,HMBS
GO:0035239	Tube morphogenesis	17	669	0.42	0.0363	9606.ENSP00000229795,9606.ENSP00000252486,9606.ENSP00000255784,9606.ENSP00000264498,9606.ENSP00000264933,9606.ENSP00000265371,9606.ENSP00000275815,9606.ENSP00000317128,9606.ENSP00000317272,9606.ENSP00000347942,9606.ENSP00000349131,9606.ENSP00000352288,9606.ENSP00000354213,9606.ENSP00000357265,9606.ENSP00000414287,9606.ENSP00000416330,9606.ENSP00000455215	MAPK14,APOE,CCDC134,FGF2,PDCD6,NRP1,EPHA1,PLXND1,MET,RET,RSPO3,PLXNB2,HS3ST3B1,SEMA4A,MST1,TGFBI,ADGRG1
GO:0045785	Positive regulation of cell adhesion	14	485	0.47	0.0363	9606.ENSP00000220003,9606.ENSP00000264257,9606.ENSP00000265371,9606.ENSP00000275815,9606.ENSP00000305603,9606.ENSP00000329380,9606.ENSP00000341206,9606.ENSP00000346964,9606.ENSP00000347942,9606.ENSP00000385451,9606.ENSP00000400010,9606.ENSP00000455215,9606.ENSP00000474412,9606.ENSP00000487365	CSK,IL1RL2,NRP1,EPHA1,FUT3,GP1BA,CHST4,EGFLAM,RET,MDK,PTPRJ,ADGRG1,CCL5,HSPH1
GO:0000165	MAPK cascade	9	219	0.63	0.0376	9606.ENSP00000215659,9606.ENSP00000229795,9606.ENSP00000264498,9606.ENSP00000296795,9606.ENSP00000305769,9606.ENSP00000347942,9606.ENSP00000371693,9606.ENSP00000385834,9606.ENSP00000474412	MAPK12,MAPK14,FGF2,TLR3,SMAD1,RET,TNFRSF19,TF,CCL5
GO:0010628	Positive regulation of gene expression	24	1146	0.33	0.0376	9606.ENSP00000215754,9606.ENSP00000222330,9606.ENSP00000223642,9606.ENSP00000229795,9606.ENSP00000264257,9606.ENSP00000264498,9606.ENSP00000267843,9606.ENSP00000270077,9606.ENSP00000296795,9606.ENSP00000305769,9606.ENSP00000336702,9606.ENSP00000340278,9606.ENSP00000342026,9606.ENSP00000347942,9606.ENSP00000352288,9606.ENSP00000354932,9606.ENSP00000360858,9606.ENSP00000362205,9606.ENSP00000385451,…	MIF,GSK3A,C5,MAPK14,IL1RL2,FGF2,FGF7,PSG9,TLR3,SMAD1,EIF5A,PARK7,PRDX6,RET,PLXNB2,TLR1,OLFM1,TREM2,MDK,RAB1A,PTPRJ,MST1,CCL5,SPON2
GO:0034380	High-density lipoprotein particle assembly	3	12	1.41	0.0376	9606.ENSP00000252486,9606.ENSP00000365081,9606.ENSP00000445002	APOE,APOM,APOA5
GO:0048251	Elastic fiber assembly	3	12	1.41	0.0376	9606.ENSP00000345008,9606.ENSP00000378957,9606.ENSP00000407685	FBLN5,MFAP4,TNXB
GO:0001817	Regulation of cytokine production	18	739	0.4	0.0381	9606.ENSP00000215754,9606.ENSP00000220003,9606.ENSP00000223642,9606.ENSP00000229795,9606.ENSP00000244519,9606.ENSP00000264257,9606.ENSP00000270077,9606.ENSP00000291759,9606.ENSP00000296795,9606.ENSP00000340278,9606.ENSP00000351497,9606.ENSP00000354932,9606.ENSP00000362205,9606.ENSP00000377833,9606.ENSP00000385451,9606.ENSP00000387286,9606.ENSP00000400010,9606.ENSP00000483599	MIF,CSK,C5,MAPK14,BTN3A3,IL1RL2,PSG9,LILRA4,TLR3,PARK7,FCGR2B,TLR1,TREM2,ANXA4,MDK,RAB1A,PTPRJ,SPON2
GO:0002252	Immune effector process	12	375	0.52	0.0381	9606.ENSP00000223642,9606.ENSP00000244519,9606.ENSP00000244709,9606.ENSP00000315630,9606.ENSP00000327599,9606.ENSP00000351497,9606.ENSP00000357265,9606.ENSP00000362205,9606.ENSP00000363079,9606.ENSP00000378957,9606.ENSP00000385451,9606.ENSP00000483599	C5,BTN3A3,TREM1,SWAP70,CLEC4G,FCGR2B,SEMA4A,TREM2,MBL2,MFAP4,MDK,SPON2
GO:0001525	Angiogenesis	11	325	0.54	0.0416	9606.ENSP00000229795,9606.ENSP00000255784,9606.ENSP00000264498,9606.ENSP00000264933,9606.ENSP00000265371,9606.ENSP00000275815,9606.ENSP00000317128,9606.ENSP00000349131,9606.ENSP00000357265,9606.ENSP00000416330,9606.ENSP00000455215	MAPK14,CCDC134,FGF2,PDCD6,NRP1,EPHA1,PLXND1,RSPO3,SEMA4A,TGFBI,ADGRG1
GO:0006631	Fatty acid metabolic process	11	325	0.54	0.0416	9606.ENSP00000215754,9606.ENSP00000229795,9606.ENSP00000296412,9606.ENSP00000296424,9606.ENSP00000311469,9606.ENSP00000358851,9606.ENSP00000369814,9606.ENSP00000369927,9606.ENSP00000407685,9606.ENSP00000438689,9606.ENSP00000466845	MIF,MAPK14,ADH5,BDH2,GSTM1,GSTM4,AKR1C4,AKR1C3,TNXB,ACADVL,GCDH
GO:0006098	Pentose-phosphate shunt	3	13	1.38	0.0434	9606.ENSP00000252603,9606.ENSP00000270776,9606.ENSP00000283646	PGLS,PGD,RPIA
GO:0046395	Carboxylic acid catabolic process	9	225	0.62	0.0434	9606.ENSP00000222002,9606.ENSP00000260508,9606.ENSP00000270776,9606.ENSP00000296424,9606.ENSP00000318868,9606.ENSP00000361140,9606.ENSP00000376807,9606.ENSP00000438689,9606.ENSP00000466845	SULT2A1,KYAT3,PGD,BDH2,SHMT1,AKR1A1,DPEP1,ACADVL,GCDH
GO:0051962	Positive regulation of nervous system development	10	275	0.57	0.0434	9606.ENSP00000219197,9606.ENSP00000264498,9606.ENSP00000265371,9606.ENSP00000317128,9606.ENSP00000339912,9606.ENSP00000352288,9606.ENSP00000355402,9606.ENSP00000357265,9606.ENSP00000366513,9606.ENSP00000385451	CBLN1,FGF2,NRP1,PLXND1,FLRT3,PLXNB2,ISLR2,SEMA4A,CLSTN1,MDK
GO:0007275	Multicellular organism development	61	4209	0.17	0.0451	9606.ENSP00000219197,9606.ENSP00000220003,9606.ENSP00000222330,9606.ENSP00000223642,9606.ENSP00000225927,9606.ENSP00000229795,9606.ENSP00000247271,9606.ENSP00000252486,9606.ENSP00000255784,9606.ENSP00000261772,9606.ENSP00000263671,9606.ENSP00000264498,9606.ENSP00000264933,9606.ENSP00000265371,9606.ENSP00000267843,9606.ENSP00000270077,9606.ENSP00000273395,9606.ENSP00000275815,9606.ENSP00000287097,…	CBLN1,CSK,GSK3A,C5,NAGLU,MAPK14,OMG,APOE,CCDC134,AARS1,CHRDL2,FGF2,PDCD6,NRP1,FGF7,PSG9,BOC,EPHA1,CD109,HAPLN4,TLR3,CYB5D2,SMAD1,SWAP70,PLXND1,CPNE1,MET,WFIKKN1,CLEC4G,GP1BA,FLRT3,ADAMTSL2,RET,RSPO3,FCGR2B,PLXNB2,SPINK5,DCLK1,HS3ST3B1,GSTM3,ISLR2,SEMA4A,THBS3,OLFM1,TREM2,AKR1C3,CRLF1,GRB2,FGL1,MDK,TF,PTPRJ,FJX1,CLMP,MST1,TGFBI,PPIA,LDHA,ADGRG1,GSS,ATXN3
GO:0034394	Protein localization to cell surface	4	34	1.08	0.0451	9606.ENSP00000267843,9606.ENSP00000345008,9606.ENSP00000371175,9606.ENSP00000438085	FGF7,FBLN5,GGA1,GGA3
GO:0030168	Platelet activation	6	97	0.8	0.0453	9606.ENSP00000229795,9606.ENSP00000279227,9606.ENSP00000296411,9606.ENSP00000329380,9606.ENSP00000364935,9606.ENSP00000419425	MAPK14,FERMT3,METAP1,GP1BA,CLIC1,PPIA
GO:0071466	Cellular response to xenobiotic stimulus	8	181	0.66	0.0465	9606.ENSP00000222002,9606.ENSP00000296795,9606.ENSP00000311469,9606.ENSP00000319788,9606.ENSP00000354357,9606.ENSP00000358851,9606.ENSP00000358896,9606.ENSP00000376807	SULT2A1,TLR3,GSTM1,NQO1,GSTM3,GSTM4,AS3MT,DPEP1
GO:0006952	Defense response	27	1394	0.3	0.0478	9606.ENSP00000215754,9606.ENSP00000223642,9606.ENSP00000243924,9606.ENSP00000244709,9606.ENSP00000253354,9606.ENSP00000259030,9606.ENSP00000264257,9606.ENSP00000291759,9606.ENSP00000296795,9606.ENSP00000296877,9606.ENSP00000305769,9606.ENSP00000340278,9606.ENSP00000341206,9606.ENSP00000351497,9606.ENSP00000354932,9606.ENSP00000361926,9606.ENSP00000362205,9606.ENSP00000363079,9606.ENSP00000376807,…	MIF,C5,PI3,TREM1,BPIFB1,RTP4,IL1RL2,LILRA4,TLR3,LEAP2,SMAD1,PARK7,CHST4,FCGR2B,TLR1,CNPY3,TREM2,MBL2,DPEP1,MFAP4,MDK,TF,RAB1A,SERPINA1,RNASE4,CCL5,SPON2
GO:0002685	Regulation of leukocyte migration	9	231	0.6	0.0495	9606.ENSP00000215754,9606.ENSP00000223642,9606.ENSP00000315630,9606.ENSP00000329380,9606.ENSP00000341206,9606.ENSP00000362205,9606.ENSP00000385451,9606.ENSP00000414287,9606.ENSP00000474412	MIF,C5,SWAP70,GP1BA,CHST4,TREM2,MDK,MST1,CCL5
GO:0042325	Regulation of phosphorylation	25	1251	0.31	0.0495	9606.ENSP00000215754,9606.ENSP00000220003,9606.ENSP00000222330,9606.ENSP00000251968,9606.ENSP00000252486,9606.ENSP00000256104,9606.ENSP00000264498,9606.ENSP00000265371,9606.ENSP00000267843,9606.ENSP00000275815,9606.ENSP00000287097,9606.ENSP00000296795,9606.ENSP00000317272,9606.ENSP00000340278,9606.ENSP00000347942,9606.ENSP00000352288,9606.ENSP00000362205,9606.ENSP00000376188,9606.ENSP00000385834,…	MIF,CSK,GSK3A,TSG101,APOE,FABP4,FGF2,NRP1,FGF7,EPHA1,CD109,TLR3,MET,PARK7,RET,PLXNB2,TREM2,CRLF1,TF,PTPRJ,TNXB,MST1,PPIA,FAM20A,CCL5
GO:1902287	Semaphorin-plexin signaling pathway involved in axon guidance	3	14	1.34	0.0495	9606.ENSP00000265371,9606.ENSP00000317128,9606.ENSP00000352288	NRP1,PLXND1,PLXNB2
GO:0001932	Regulation of protein phosphorylation	23	1108	0.33	0.0499	9606.ENSP00000215754,9606.ENSP00000220003,9606.ENSP00000222330,9606.ENSP00000251968,9606.ENSP00000252486,9606.ENSP00000256104,9606.ENSP00000264498,9606.ENSP00000265371,9606.ENSP00000267843,9606.ENSP00000275815,9606.ENSP00000287097,9606.ENSP00000296795,9606.ENSP00000340278,9606.ENSP00000347942,9606.ENSP00000352288,9606.ENSP00000362205,9606.ENSP00000376188,9606.ENSP00000400010,9606.ENSP00000407685,…	MIF,CSK,GSK3A,TSG101,APOE,FABP4,FGF2,NRP1,FGF7,EPHA1,CD109,TLR3,PARK7,RET,PLXNB2,TREM2,CRLF1,PTPRJ,TNXB,MST1,PPIA,FAM20A,CCL5
GO:0071310	Cellular response to organic substance	35	2019	0.25	0.05	9606.ENSP00000216714,9606.ENSP00000220003,9606.ENSP00000222330,9606.ENSP00000229795,9606.ENSP00000256104,9606.ENSP00000264257,9606.ENSP00000264498,9606.ENSP00000265371,9606.ENSP00000267843,9606.ENSP00000270077,9606.ENSP00000291759,9606.ENSP00000296795,9606.ENSP00000300289,9606.ENSP00000305769,9606.ENSP00000318868,9606.ENSP00000336702,9606.ENSP00000339912,9606.ENSP00000340278,9606.ENSP00000347942,…	APEX1,CSK,GSK3A,MAPK14,FABP4,IL1RL2,FGF2,NRP1,FGF7,PSG9,LILRA4,TLR3,PDIA3,SMAD1,SHMT1,EIF5A,FLRT3,PARK7,RET,FCGR2B,GCLM,TREM2,AKR1C4,AKR1C3,TNFRSF19,CRLF1,GRB2,PTPRJ,AOC1,IL18BP,ASIP,CCL5,ST3GAL6,SPON2,ATXN3

## Sheet: Table S9
Table S9 GO biological process enrichment for the suggestive proteins of BC_ER(+).
#term ID	term description	observed gene count	background gene count	strength	false discovery rate	matching proteins in your network (IDs)	matching proteins in your network (labels)
GO:0044281	Small molecule metabolic process	40	1645	0.48	4.05e-06	9606.ENSP00000222002,9606.ENSP00000223836,9606.ENSP00000225614,9606.ENSP00000227868,9606.ENSP00000229795,9606.ENSP00000230431,9606.ENSP00000252486,9606.ENSP00000260508,9606.ENSP00000262290,9606.ENSP00000264498,9606.ENSP00000270776,9606.ENSP00000284719,9606.ENSP00000296412,9606.ENSP00000296424,9606.ENSP00000300738,9606.ENSP00000311469,9606.ENSP00000318868,9606.ENSP00000339479,9606.ENSP00000340278,…	SULT2A1,AK1,GALK1,PDHX,MAPK14,DNPH1,APOE,KYAT3,LPO,FGF2,PGD,OLA1,ADH5,BDH2,RRM1,GSTM1,SHMT1,NT5C2,PARK7,B3GLCT,FH,GSTM4,AS3MT,MINPP1,AKR1A1,PPCS,GNMT,AKR1C4,AKR1C3,ADH6,DNAJC30,ACY1,PRPSAP1,PLTP,ACADVL,APOA5,LDHA,GCDH,SARS2,PPT1
GO:1901135	Carbohydrate derivative metabolic process	29	998	0.56	2.11e-05	9606.ENSP00000204679,9606.ENSP00000222002,9606.ENSP00000223836,9606.ENSP00000225614,9606.ENSP00000225927,9606.ENSP00000227868,9606.ENSP00000230431,9606.ENSP00000264498,9606.ENSP00000270776,9606.ENSP00000284719,9606.ENSP00000300738,9606.ENSP00000315386,9606.ENSP00000318868,9606.ENSP00000339479,9606.ENSP00000340278,9606.ENSP00000343002,9606.ENSP00000361140,9606.ENSP00000361642,9606.ENSP00000361894,…	GNPTG,SULT2A1,AK1,GALK1,NAGLU,PDHX,DNPH1,FGF2,PGD,OLA1,RRM1,POGLUT3,SHMT1,NT5C2,PARK7,B3GLCT,AKR1A1,PPCS,GNMT,AKR1C4,AKR1C3,DNAJC30,A4GALT,PRPSAP1,LDHA,GCDH,ABO,PPT1,MANBA
GO:0006082	Organic acid metabolic process	26	868	0.57	5.78e-05	9606.ENSP00000222002,9606.ENSP00000225614,9606.ENSP00000227868,9606.ENSP00000229795,9606.ENSP00000260508,9606.ENSP00000262290,9606.ENSP00000270776,9606.ENSP00000296412,9606.ENSP00000296424,9606.ENSP00000311469,9606.ENSP00000318868,9606.ENSP00000340278,9606.ENSP00000355518,9606.ENSP00000358851,9606.ENSP00000358896,9606.ENSP00000361064,9606.ENSP00000361140,9606.ENSP00000361894,9606.ENSP00000369814,…	SULT2A1,GALK1,PDHX,MAPK14,KYAT3,LPO,PGD,ADH5,BDH2,GSTM1,SHMT1,PARK7,FH,GSTM4,AS3MT,MINPP1,AKR1A1,GNMT,AKR1C4,AKR1C3,ADH6,ACY1,ACADVL,LDHA,GCDH,SARS2
GO:0043436	Oxoacid metabolic process	24	846	0.55	0.00041	9606.ENSP00000222002,9606.ENSP00000225614,9606.ENSP00000227868,9606.ENSP00000229795,9606.ENSP00000260508,9606.ENSP00000270776,9606.ENSP00000296412,9606.ENSP00000296424,9606.ENSP00000311469,9606.ENSP00000318868,9606.ENSP00000340278,9606.ENSP00000355518,9606.ENSP00000358851,9606.ENSP00000361064,9606.ENSP00000361140,9606.ENSP00000361894,9606.ENSP00000369814,9606.ENSP00000369927,9606.ENSP00000378359,…	SULT2A1,GALK1,PDHX,MAPK14,KYAT3,PGD,ADH5,BDH2,GSTM1,SHMT1,PARK7,FH,GSTM4,MINPP1,AKR1A1,GNMT,AKR1C4,AKR1C3,ADH6,ACY1,ACADVL,LDHA,GCDH,SARS2
GO:1901564	Organonitrogen compound metabolic process	71	4981	0.25	0.00041	9606.ENSP00000204679,9606.ENSP00000215659,9606.ENSP00000220003,9606.ENSP00000222002,9606.ENSP00000223836,9606.ENSP00000225614,9606.ENSP00000225927,9606.ENSP00000227868,9606.ENSP00000229795,9606.ENSP00000230431,9606.ENSP00000246337,9606.ENSP00000251968,9606.ENSP00000252486,9606.ENSP00000260508,9606.ENSP00000262545,9606.ENSP00000264498,9606.ENSP00000265171,9606.ENSP00000265260,9606.ENSP00000269298,…	GNPTG,MAPK12,CSK,SULT2A1,AK1,GALK1,NAGLU,PDHX,MAPK14,DNPH1,UROD,TSG101,APOE,KYAT3,PCSK2,FGF2,EGF,PCNP,SAT2,ACP1,UBASH3B,OLA1,CD109,FCN2,METAP1,ADH5,BDH2,CTSF,GSTM1,POGLUT3,CPNE1,MET,SHMT1,GP1BA,EIF5A,NT5C2,PARK7,B3GLCT,RET,GSTM3,FH,F5,GSTM4,AKR1A1,CTSA,PPCS,GNMT,CLIC1,TEC,GGA1,DNAJC30,ACY1,A4GALT,PCYOX1,PTPRJ,AOC1,MST1,PRPSAP1,PTK7,PPIA,EIF1AD,GGA3,APOA5,LDHA,GCDH,SARS2,ABO,PPT1,MANBA,ATXN3,HMBS
GO:0019752	Carboxylic acid metabolic process	23	819	0.54	0.00068	9606.ENSP00000222002,9606.ENSP00000225614,9606.ENSP00000227868,9606.ENSP00000229795,9606.ENSP00000260508,9606.ENSP00000270776,9606.ENSP00000296412,9606.ENSP00000296424,9606.ENSP00000311469,9606.ENSP00000318868,9606.ENSP00000340278,9606.ENSP00000355518,9606.ENSP00000358851,9606.ENSP00000361140,9606.ENSP00000361894,9606.ENSP00000369814,9606.ENSP00000369927,9606.ENSP00000378359,9606.ENSP00000384296,…	SULT2A1,GALK1,PDHX,MAPK14,KYAT3,PGD,ADH5,BDH2,GSTM1,SHMT1,PARK7,FH,GSTM4,AKR1A1,GNMT,AKR1C4,AKR1C3,ADH6,ACY1,ACADVL,LDHA,GCDH,SARS2
GO:0009056	Catabolic process	38	1976	0.38	0.00086	9606.ENSP00000216714,9606.ENSP00000222002,9606.ENSP00000225614,9606.ENSP00000225927,9606.ENSP00000230431,9606.ENSP00000246337,9606.ENSP00000251968,9606.ENSP00000252486,9606.ENSP00000260508,9606.ENSP00000262290,9606.ENSP00000264498,9606.ENSP00000265260,9606.ENSP00000270776,9606.ENSP00000296412,9606.ENSP00000296424,9606.ENSP00000310832,9606.ENSP00000311469,9606.ENSP00000318868,9606.ENSP00000339479,…	APEX1,SULT2A1,GALK1,NAGLU,DNPH1,UROD,TSG101,APOE,KYAT3,LPO,FGF2,PCNP,PGD,ADH5,BDH2,CTSF,GSTM1,SHMT1,NT5C2,PARK7,PRDX6,GSTM3,GSTM4,AKR1A1,TREM2,AKR1C3,GGA1,PCYOX1,CRYZ,GGA3,ACADVL,APOA5,LDHA,GCDH,AMY2A,PPT1,MANBA,ATXN3
GO:0002682	Regulation of immune system process	31	1438	0.43	0.001	9606.ENSP00000053867,9606.ENSP00000220003,9606.ENSP00000223642,9606.ENSP00000229795,9606.ENSP00000233809,9606.ENSP00000244519,9606.ENSP00000252229,9606.ENSP00000252483,9606.ENSP00000252486,9606.ENSP00000253354,9606.ENSP00000264257,9606.ENSP00000284273,9606.ENSP00000291744,9606.ENSP00000291759,9606.ENSP00000313875,9606.ENSP00000315630,9606.ENSP00000329380,9606.ENSP00000340278,9606.ENSP00000348461,…	GRN,CSK,C5,MAPK14,IGFBP2,BTN3A3,MICB,NECTIN2,APOE,BPIFB1,IL1RL2,UBASH3B,FCN2,LILRA4,CD46,SWAP70,GP1BA,PARK7,RAC1,SPINK5,TLR1,CR1,TREM2,TNFRSF1B,TEC,MFAP4,FGL1,PTPRJ,MST1,SPON2,HSPH1
GO:0006950	Response to stress	53	3358	0.29	0.001	9606.ENSP00000053867,9606.ENSP00000215659,9606.ENSP00000216714,9606.ENSP00000223642,9606.ENSP00000229795,9606.ENSP00000233156,9606.ENSP00000244709,9606.ENSP00000247271,9606.ENSP00000252229,9606.ENSP00000252486,9606.ENSP00000253354,9606.ENSP00000262290,9606.ENSP00000263636,9606.ENSP00000264257,9606.ENSP00000264498,9606.ENSP00000264933,9606.ENSP00000267843,9606.ENSP00000284273,9606.ENSP00000291744,…	GRN,MAPK12,APEX1,C5,MAPK14,TFPI,TREM1,OMG,MICB,APOE,BPIFB1,LPO,LY75,IL1RL2,FGF2,PDCD6,FGF7,UBASH3B,FCN2,LILRA4,INHBB,METAP1,ADH5,LEAP2,PDIA3,RRM1,GSTM1,CD46,GP1BA,PARK7,PRDX6,RET,RAC1,GSTM3,TLR1,FH,CR1,F5,CNPY3,TREM2,CLIC1,TNFRSF1B,AKR1C3,MFAP4,AOC1,MST1,SERPINA1,PTK7,PPIA,ACADVL,SPON2,HSPH1,ATXN3
GO:0048856	Anatomical structure development	70	5117	0.23	0.0011	9606.ENSP00000053867,9606.ENSP00000064780,9606.ENSP00000215659,9606.ENSP00000219197,9606.ENSP00000220003,9606.ENSP00000223642,9606.ENSP00000225927,9606.ENSP00000229795,9606.ENSP00000230431,9606.ENSP00000247271,9606.ENSP00000251968,9606.ENSP00000252483,9606.ENSP00000252486,9606.ENSP00000255784,9606.ENSP00000262545,9606.ENSP00000264144,9606.ENSP00000264498,9606.ENSP00000264933,9606.ENSP00000265171,…	GRN,RELT,MAPK12,CBLN1,CSK,C5,NAGLU,MAPK14,DNPH1,OMG,TSG101,NECTIN2,APOE,CCDC134,PCSK2,LAMC2,FGF2,PDCD6,EGF,FGF7,LRIG1,LECT2,CD109,HAPLN4,INHBB,BDH2,CYB5D2,CST6,SWAP70,PLXND1,CPNE1,MET,GP1BA,ADAMTSL2,RET,RAC1,RSPO3,PLXNB2,SPINK5,PYY,GSTM3,ISLR2,SEMA4A,THBS3,MINPP1,TREM2,CLIC4,SVEP1,TNFRSF1B,AGRN,AKR1C3,TEC,CRLF1,PTGFRN,ANXA4,DNAJC30,FGL1,PTPRJ,FJX1,CLMP,MST1,TGFBI,PTK7,PPIA,ACADVL,APOA5,LDHA,FAM20…
GO:0006796	Phosphate-containing compound metabolic process	36	1877	0.38	0.0012	9606.ENSP00000204679,9606.ENSP00000215659,9606.ENSP00000220003,9606.ENSP00000222002,9606.ENSP00000223836,9606.ENSP00000225614,9606.ENSP00000227868,9606.ENSP00000229795,9606.ENSP00000230431,9606.ENSP00000264498,9606.ENSP00000265171,9606.ENSP00000270776,9606.ENSP00000272067,9606.ENSP00000284273,9606.ENSP00000284719,9606.ENSP00000287097,9606.ENSP00000300738,9606.ENSP00000317272,9606.ENSP00000318868,…	GNPTG,MAPK12,CSK,SULT2A1,AK1,GALK1,PDHX,MAPK14,DNPH1,FGF2,EGF,PGD,ACP1,UBASH3B,OLA1,CD109,RRM1,MET,SHMT1,NT5C2,PARK7,PRDX6,RET,MINPP1,AKR1A1,PPCS,TEC,DNAJC30,PTPRJ,MST1,PRPSAP1,PTK7,APOA5,LDHA,GCDH,PPT1
GO:0009888	Tissue development	34	1723	0.39	0.0012	9606.ENSP00000229795,9606.ENSP00000230431,9606.ENSP00000251968,9606.ENSP00000264144,9606.ENSP00000264498,9606.ENSP00000264933,9606.ENSP00000265171,9606.ENSP00000267843,9606.ENSP00000287097,9606.ENSP00000296424,9606.ENSP00000311313,9606.ENSP00000317128,9606.ENSP00000317272,9606.ENSP00000346478,9606.ENSP00000347942,9606.ENSP00000349131,9606.ENSP00000352288,9606.ENSP00000352936,9606.ENSP00000353198,…	MAPK14,DNPH1,TSG101,LAMC2,FGF2,PDCD6,EGF,FGF7,CD109,BDH2,CST6,PLXND1,MET,ADAMTSL2,RET,RSPO3,PLXNB2,SPINK5,PYY,GSTM3,SEMA4A,THBS3,MINPP1,CLIC4,SVEP1,AGRN,AKR1C3,CRLF1,ANXA4,MST1,TGFBI,PTK7,ACADVL,FAM20A
GO:0032102	Negative regulation of response to external stimulus	15	387	0.68	0.0012	9606.ENSP00000053867,9606.ENSP00000223642,9606.ENSP00000229795,9606.ENSP00000233156,9606.ENSP00000252229,9606.ENSP00000252486,9606.ENSP00000264498,9606.ENSP00000284273,9606.ENSP00000287097,9606.ENSP00000329380,9606.ENSP00000352936,9606.ENSP00000356016,9606.ENSP00000357265,9606.ENSP00000362205,9606.ENSP00000365435	GRN,C5,MAPK14,TFPI,MICB,APOE,FGF2,UBASH3B,CD109,GP1BA,SPINK5,CR1,SEMA4A,TREM2,TNFRSF1B
GO:0032787	Monocarboxylic acid metabolic process	17	502	0.62	0.0012	9606.ENSP00000222002,9606.ENSP00000225614,9606.ENSP00000227868,9606.ENSP00000229795,9606.ENSP00000270776,9606.ENSP00000296412,9606.ENSP00000296424,9606.ENSP00000311469,9606.ENSP00000340278,9606.ENSP00000358851,9606.ENSP00000361140,9606.ENSP00000369814,9606.ENSP00000369927,9606.ENSP00000378359,9606.ENSP00000438689,9606.ENSP00000445175,9606.ENSP00000466845	SULT2A1,GALK1,PDHX,MAPK14,PGD,ADH5,BDH2,GSTM1,PARK7,GSTM4,AKR1A1,AKR1C4,AKR1C3,ADH6,ACADVL,LDHA,GCDH
GO:0050776	Regulation of immune response	22	844	0.51	0.0016	9606.ENSP00000053867,9606.ENSP00000220003,9606.ENSP00000223642,9606.ENSP00000229795,9606.ENSP00000244519,9606.ENSP00000252229,9606.ENSP00000252483,9606.ENSP00000252486,9606.ENSP00000253354,9606.ENSP00000291744,9606.ENSP00000291759,9606.ENSP00000313875,9606.ENSP00000340278,9606.ENSP00000352936,9606.ENSP00000354932,9606.ENSP00000356016,9606.ENSP00000362205,9606.ENSP00000365435,9606.ENSP00000370912,…	GRN,CSK,C5,MAPK14,BTN3A3,MICB,NECTIN2,APOE,BPIFB1,FCN2,LILRA4,CD46,PARK7,SPINK5,TLR1,CR1,TREM2,TNFRSF1B,TEC,MFAP4,FGL1,PTPRJ
GO:0072521	Purine-containing compound metabolic process	15	425	0.64	0.0025	9606.ENSP00000222002,9606.ENSP00000223836,9606.ENSP00000225614,9606.ENSP00000227868,9606.ENSP00000230431,9606.ENSP00000284719,9606.ENSP00000318868,9606.ENSP00000339479,9606.ENSP00000361642,9606.ENSP00000361894,9606.ENSP00000378605,9606.ENSP00000414624,9606.ENSP00000445175,9606.ENSP00000466845,9606.ENSP00000493153	SULT2A1,AK1,GALK1,PDHX,DNPH1,OLA1,SHMT1,NT5C2,PPCS,GNMT,DNAJC30,PRPSAP1,LDHA,GCDH,PPT1
GO:0009117	Nucleotide metabolic process	16	493	0.6	0.0028	9606.ENSP00000222002,9606.ENSP00000223836,9606.ENSP00000225614,9606.ENSP00000227868,9606.ENSP00000230431,9606.ENSP00000284719,9606.ENSP00000300738,9606.ENSP00000318868,9606.ENSP00000339479,9606.ENSP00000340278,9606.ENSP00000361642,9606.ENSP00000378605,9606.ENSP00000414624,9606.ENSP00000445175,9606.ENSP00000466845,9606.ENSP00000493153	SULT2A1,AK1,GALK1,PDHX,DNPH1,OLA1,RRM1,SHMT1,NT5C2,PARK7,PPCS,DNAJC30,PRPSAP1,LDHA,GCDH,PPT1
GO:0032101	Regulation of response to external stimulus	23	964	0.47	0.0028	9606.ENSP00000053867,9606.ENSP00000223642,9606.ENSP00000229795,9606.ENSP00000233156,9606.ENSP00000252229,9606.ENSP00000252483,9606.ENSP00000252486,9606.ENSP00000264257,9606.ENSP00000264498,9606.ENSP00000284273,9606.ENSP00000287097,9606.ENSP00000291744,9606.ENSP00000315630,9606.ENSP00000317272,9606.ENSP00000329380,9606.ENSP00000340278,9606.ENSP00000348461,9606.ENSP00000352936,9606.ENSP00000356016,…	GRN,C5,MAPK14,TFPI,MICB,NECTIN2,APOE,IL1RL2,FGF2,UBASH3B,CD109,FCN2,SWAP70,MET,GP1BA,PARK7,RAC1,SPINK5,CR1,SEMA4A,TREM2,TNFRSF1B,MST1
GO:0035295	Tube development	22	880	0.49	0.0028	9606.ENSP00000229795,9606.ENSP00000252486,9606.ENSP00000255784,9606.ENSP00000264498,9606.ENSP00000264933,9606.ENSP00000265171,9606.ENSP00000267843,9606.ENSP00000295228,9606.ENSP00000317128,9606.ENSP00000317272,9606.ENSP00000346478,9606.ENSP00000347942,9606.ENSP00000349131,9606.ENSP00000352288,9606.ENSP00000353198,9606.ENSP00000357265,9606.ENSP00000363500,9606.ENSP00000376188,9606.ENSP00000405577,…	MAPK14,APOE,CCDC134,FGF2,PDCD6,EGF,FGF7,INHBB,PLXND1,MET,ADAMTSL2,RET,RSPO3,PLXNB2,PYY,SEMA4A,CLIC4,CRLF1,CLMP,MST1,TGFBI,PTK7
GO:0070887	Cellular response to chemical stimulus	43	2609	0.31	0.0028	9606.ENSP00000216714,9606.ENSP00000220003,9606.ENSP00000222002,9606.ENSP00000223642,9606.ENSP00000229795,9606.ENSP00000233156,9606.ENSP00000233809,9606.ENSP00000244709,9606.ENSP00000252486,9606.ENSP00000262290,9606.ENSP00000264257,9606.ENSP00000264498,9606.ENSP00000267843,9606.ENSP00000291759,9606.ENSP00000295228,9606.ENSP00000296412,9606.ENSP00000300289,9606.ENSP00000311469,9606.ENSP00000317257,…	APEX1,CSK,SULT2A1,C5,MAPK14,TFPI,IGFBP2,TREM1,APOE,LPO,IL1RL2,FGF2,FGF7,LILRA4,INHBB,ADH5,PDIA3,GSTM1,CPNE1,SHMT1,EIF5A,PARK7,PRDX6,RET,GSTM3,GSTM4,AS3MT,AKR1A1,TREM2,CLIC4,TNFRSF1B,AGRN,AKR1C4,AKR1C3,CRLF1,CRYZ,PTPRJ,AOC1,MST1,PTK7,PPIA,SPON2,ATXN3
GO:1990748	Cellular detoxification	8	106	0.97	0.0028	9606.ENSP00000252486,9606.ENSP00000262290,9606.ENSP00000296412,9606.ENSP00000311469,9606.ENSP00000340278,9606.ENSP00000342026,9606.ENSP00000354357,9606.ENSP00000361140	APOE,LPO,ADH5,GSTM1,PARK7,PRDX6,GSTM3,AKR1A1
GO:0009611	Response to wounding	15	444	0.62	0.0029	9606.ENSP00000229795,9606.ENSP00000233156,9606.ENSP00000264498,9606.ENSP00000267843,9606.ENSP00000284273,9606.ENSP00000295228,9606.ENSP00000296411,9606.ENSP00000329380,9606.ENSP00000348461,9606.ENSP00000356771,9606.ENSP00000362205,9606.ENSP00000364935,9606.ENSP00000416066,9606.ENSP00000418754,9606.ENSP00000419425	MAPK14,TFPI,FGF2,FGF7,UBASH3B,INHBB,METAP1,GP1BA,RAC1,F5,TREM2,CLIC1,SERPINA1,PTK7,PPIA
GO:0055086	Nucleobase-containing small molecule metabolic process	17	567	0.57	0.0029	9606.ENSP00000222002,9606.ENSP00000223836,9606.ENSP00000225614,9606.ENSP00000227868,9606.ENSP00000230431,9606.ENSP00000284719,9606.ENSP00000300738,9606.ENSP00000318868,9606.ENSP00000339479,9606.ENSP00000340278,9606.ENSP00000361642,9606.ENSP00000361894,9606.ENSP00000378605,9606.ENSP00000414624,9606.ENSP00000445175,9606.ENSP00000466845,9606.ENSP00000493153	SULT2A1,AK1,GALK1,PDHX,DNPH1,OLA1,RRM1,SHMT1,NT5C2,PARK7,PPCS,GNMT,DNAJC30,PRPSAP1,LDHA,GCDH,PPT1
GO:0006790	Sulfur compound metabolic process	13	336	0.68	0.003	9606.ENSP00000222002,9606.ENSP00000227868,9606.ENSP00000262290,9606.ENSP00000311469,9606.ENSP00000340278,9606.ENSP00000354357,9606.ENSP00000358851,9606.ENSP00000361140,9606.ENSP00000361642,9606.ENSP00000361894,9606.ENSP00000364935,9606.ENSP00000466845,9606.ENSP00000493153	SULT2A1,PDHX,LPO,GSTM1,PARK7,GSTM3,GSTM4,AKR1A1,PPCS,GNMT,CLIC1,GCDH,PPT1
GO:1901575	Organic substance catabolic process	32	1686	0.37	0.003	9606.ENSP00000216714,9606.ENSP00000222002,9606.ENSP00000225614,9606.ENSP00000225927,9606.ENSP00000230431,9606.ENSP00000246337,9606.ENSP00000251968,9606.ENSP00000252486,9606.ENSP00000260508,9606.ENSP00000264498,9606.ENSP00000265260,9606.ENSP00000270776,9606.ENSP00000296412,9606.ENSP00000296424,9606.ENSP00000310832,9606.ENSP00000318868,9606.ENSP00000339479,9606.ENSP00000340278,9606.ENSP00000342026,…	APEX1,SULT2A1,GALK1,NAGLU,DNPH1,UROD,TSG101,APOE,KYAT3,FGF2,PCNP,PGD,ADH5,BDH2,CTSF,SHMT1,NT5C2,PARK7,PRDX6,AKR1A1,AKR1C3,GGA1,PCYOX1,GGA3,ACADVL,APOA5,LDHA,GCDH,AMY2A,PPT1,MANBA,ATXN3
GO:0006935	Chemotaxis	16	516	0.58	0.0032	9606.ENSP00000223642,9606.ENSP00000229795,9606.ENSP00000244709,9606.ENSP00000264144,9606.ENSP00000264498,9606.ENSP00000267843,9606.ENSP00000274507,9606.ENSP00000317128,9606.ENSP00000317272,9606.ENSP00000347942,9606.ENSP00000348461,9606.ENSP00000352288,9606.ENSP00000357265,9606.ENSP00000400010,9606.ENSP00000418754,9606.ENSP00000419425	C5,MAPK14,TREM1,LAMC2,FGF2,FGF7,LECT2,PLXND1,MET,RET,RAC1,PLXNB2,SEMA4A,PTPRJ,PTK7,PPIA
GO:0019637	Organophosphate metabolic process	22	914	0.47	0.0032	9606.ENSP00000222002,9606.ENSP00000223836,9606.ENSP00000225614,9606.ENSP00000227868,9606.ENSP00000230431,9606.ENSP00000264498,9606.ENSP00000270776,9606.ENSP00000284719,9606.ENSP00000300738,9606.ENSP00000318868,9606.ENSP00000339479,9606.ENSP00000340278,9606.ENSP00000342026,9606.ENSP00000361064,9606.ENSP00000361140,9606.ENSP00000361642,9606.ENSP00000378605,9606.ENSP00000414624,9606.ENSP00000445002,…	SULT2A1,AK1,GALK1,PDHX,DNPH1,FGF2,PGD,OLA1,RRM1,SHMT1,NT5C2,PARK7,PRDX6,MINPP1,AKR1A1,PPCS,DNAJC30,PRPSAP1,APOA5,LDHA,GCDH,PPT1
GO:0051897	Positive regulation of protein kinase B signaling	8	113	0.94	0.0032	9606.ENSP00000264498,9606.ENSP00000265171,9606.ENSP00000317257,9606.ENSP00000317272,9606.ENSP00000340278,9606.ENSP00000347942,9606.ENSP00000369927,9606.ENSP00000400010	FGF2,EGF,CPNE1,MET,PARK7,RET,AKR1C3,PTPRJ
GO:0032502	Developmental process	72	5657	0.2	0.0034	9606.ENSP00000053867,9606.ENSP00000064780,9606.ENSP00000215659,9606.ENSP00000216714,9606.ENSP00000219197,9606.ENSP00000220003,9606.ENSP00000223642,9606.ENSP00000225927,9606.ENSP00000229795,9606.ENSP00000230431,9606.ENSP00000233809,9606.ENSP00000247271,9606.ENSP00000251968,9606.ENSP00000252483,9606.ENSP00000252486,9606.ENSP00000255784,9606.ENSP00000262545,9606.ENSP00000264144,9606.ENSP00000264498,…	GRN,RELT,MAPK12,APEX1,CBLN1,CSK,C5,NAGLU,MAPK14,DNPH1,IGFBP2,OMG,TSG101,NECTIN2,APOE,CCDC134,PCSK2,LAMC2,FGF2,PDCD6,EGF,FGF7,LRIG1,LECT2,CD109,HAPLN4,INHBB,BDH2,CYB5D2,CST6,SWAP70,PLXND1,CPNE1,MET,GP1BA,ADAMTSL2,RET,RAC1,RSPO3,PLXNB2,SPINK5,PYY,GSTM3,ISLR2,SEMA4A,THBS3,MINPP1,TREM2,CLIC4,SVEP1,TNFRSF1B,AGRN,AKR1C3,TEC,CRLF1,PTGFRN,ANXA4,DNAJC30,FGL1,PTPRJ,FJX1,CLMP,MST1,TGFBI,PTK7,PPIA,ACADVL,APO…
GO:0050896	Response to stimulus	91	7835	0.16	0.0034	9606.ENSP00000053867,9606.ENSP00000215659,9606.ENSP00000216714,9606.ENSP00000220003,9606.ENSP00000222002,9606.ENSP00000223642,9606.ENSP00000229795,9606.ENSP00000233156,9606.ENSP00000233809,9606.ENSP00000244519,9606.ENSP00000244709,9606.ENSP00000247271,9606.ENSP00000252229,9606.ENSP00000252486,9606.ENSP00000253354,9606.ENSP00000262290,9606.ENSP00000263636,9606.ENSP00000264144,9606.ENSP00000264257,…	GRN,MAPK12,APEX1,CSK,SULT2A1,C5,MAPK14,TFPI,IGFBP2,BTN3A3,TREM1,OMG,MICB,APOE,BPIFB1,LPO,LY75,LAMC2,IL1RL2,FGF2,PDCD6,EGF,FGF7,SERPINB13,BCAM,RAB5A,LECT2,UBASH3B,FCN2,LILRA4,INHBB,METAP1,ADH5,LEAP2,PDIA3,RRM1,GSTM1,CD46,SWAP70,PLXND1,CPNE1,MET,SHMT1,GP1BA,EIF5A,PARK7,PRDX6,RET,RAC1,RSPO3,PLXNB2,PYY,GSTM3,TLR1,FH,CR1,F5,SEMA4A,GSTM4,AS3MT,AKR1A1,CNPY3,TREM2,CLIC4,SVEP1,CLIC1,TNFRSF1B,AGRN,GDI2,AKR…
GO:0009605	Response to external stimulus	39	2355	0.31	0.0042	9606.ENSP00000223642,9606.ENSP00000229795,9606.ENSP00000233809,9606.ENSP00000244709,9606.ENSP00000252486,9606.ENSP00000253354,9606.ENSP00000262290,9606.ENSP00000264144,9606.ENSP00000264257,9606.ENSP00000264498,9606.ENSP00000267843,9606.ENSP00000274507,9606.ENSP00000291744,9606.ENSP00000291759,9606.ENSP00000295228,9606.ENSP00000296412,9606.ENSP00000296877,9606.ENSP00000313875,9606.ENSP00000317128,…	C5,MAPK14,IGFBP2,TREM1,APOE,BPIFB1,LPO,LAMC2,IL1RL2,FGF2,FGF7,LECT2,FCN2,LILRA4,INHBB,ADH5,LEAP2,CD46,PLXND1,MET,EIF5A,RET,RAC1,PLXNB2,TLR1,CR1,F5,SEMA4A,CNPY3,TREM2,TNFRSF1B,AKR1C3,MFAP4,PTPRJ,AOC1,PTK7,PPIA,FAM20A,SPON2
GO:0071704	Organic substance metabolic process	88	7522	0.16	0.0042	9606.ENSP00000204679,9606.ENSP00000215659,9606.ENSP00000216714,9606.ENSP00000220003,9606.ENSP00000220496,9606.ENSP00000222002,9606.ENSP00000223836,9606.ENSP00000225614,9606.ENSP00000225927,9606.ENSP00000227868,9606.ENSP00000229795,9606.ENSP00000230431,9606.ENSP00000246337,9606.ENSP00000251968,9606.ENSP00000252486,9606.ENSP00000260508,9606.ENSP00000262290,9606.ENSP00000262545,9606.ENSP00000264498,…	GNPTG,MAPK12,APEX1,CSK,DNAJC17,SULT2A1,AK1,GALK1,NAGLU,PDHX,MAPK14,DNPH1,UROD,TSG101,APOE,KYAT3,LPO,PCSK2,FGF2,EGF,PCNP,SAT2,PGD,ACP1,UBASH3B,OLA1,CD109,FCN2,METAP1,ADH5,BDH2,RRM1,CTSF,GSTM1,POGLUT3,SWAP70,CPNE1,MET,SHMT1,GP1BA,EIF5A,NT5C2,PARK7,PRDX6,B3GLCT,RET,GSTM3,AMY2B,FH,F5,GSTM4,AS3MT,MINPP1,AKR1A1,CTSA,PPCS,GNMT,SVEP1,CLIC1,AKR1C4,AKR1C3,TEC,GGA1,ADH6,DNAJC30,ACY1,A4GALT,PCYOX1,PTPRJ,AOC1…
GO:0042221	Response to chemical	56	4010	0.24	0.0044	9606.ENSP00000216714,9606.ENSP00000220003,9606.ENSP00000222002,9606.ENSP00000223642,9606.ENSP00000229795,9606.ENSP00000233156,9606.ENSP00000233809,9606.ENSP00000244709,9606.ENSP00000252229,9606.ENSP00000252486,9606.ENSP00000262290,9606.ENSP00000264144,9606.ENSP00000264257,9606.ENSP00000264498,9606.ENSP00000264933,9606.ENSP00000267843,9606.ENSP00000274507,9606.ENSP00000291759,9606.ENSP00000295228,…	APEX1,CSK,SULT2A1,C5,MAPK14,TFPI,IGFBP2,TREM1,MICB,APOE,LPO,LAMC2,IL1RL2,FGF2,PDCD6,FGF7,LECT2,LILRA4,INHBB,ADH5,PDIA3,GSTM1,PLXND1,CPNE1,MET,SHMT1,EIF5A,PARK7,PRDX6,RET,RAC1,PLXNB2,GSTM3,TLR1,F5,SEMA4A,GSTM4,AS3MT,AKR1A1,TREM2,CLIC4,TNFRSF1B,AGRN,AKR1C4,AKR1C3,CRLF1,ADH6,CRYZ,PTPRJ,AOC1,MST1,PTK7,PPIA,SPON2,HSPH1,ATXN3
GO:0051896	Regulation of protein kinase B signaling	9	166	0.83	0.0048	9606.ENSP00000264498,9606.ENSP00000264933,9606.ENSP00000265171,9606.ENSP00000317257,9606.ENSP00000317272,9606.ENSP00000340278,9606.ENSP00000347942,9606.ENSP00000369927,9606.ENSP00000400010	FGF2,PDCD6,EGF,CPNE1,MET,PARK7,RET,AKR1C3,PTPRJ
GO:0044282	Small molecule catabolic process	13	369	0.64	0.0051	9606.ENSP00000222002,9606.ENSP00000225614,9606.ENSP00000252486,9606.ENSP00000260508,9606.ENSP00000270776,9606.ENSP00000296412,9606.ENSP00000296424,9606.ENSP00000318868,9606.ENSP00000340278,9606.ENSP00000361140,9606.ENSP00000369927,9606.ENSP00000438689,9606.ENSP00000466845	SULT2A1,GALK1,APOE,KYAT3,PGD,ADH5,BDH2,SHMT1,PARK7,AKR1A1,AKR1C3,ACADVL,GCDH
GO:0006066	Alcohol metabolic process	12	324	0.66	0.0063	9606.ENSP00000222002,9606.ENSP00000225614,9606.ENSP00000252486,9606.ENSP00000264498,9606.ENSP00000296412,9606.ENSP00000340278,9606.ENSP00000361064,9606.ENSP00000361140,9606.ENSP00000369814,9606.ENSP00000369927,9606.ENSP00000378359,9606.ENSP00000445002	SULT2A1,GALK1,APOE,FGF2,ADH5,PARK7,MINPP1,AKR1A1,AKR1C4,AKR1C3,ADH6,APOA5
GO:0007596	Blood coagulation	9	173	0.81	0.0063	9606.ENSP00000229795,9606.ENSP00000233156,9606.ENSP00000284273,9606.ENSP00000296411,9606.ENSP00000329380,9606.ENSP00000356771,9606.ENSP00000364935,9606.ENSP00000416066,9606.ENSP00000419425	MAPK14,TFPI,UBASH3B,METAP1,GP1BA,F5,CLIC1,SERPINA1,PPIA
GO:0008152	Metabolic process	91	7988	0.15	0.0063	9606.ENSP00000204679,9606.ENSP00000215659,9606.ENSP00000216714,9606.ENSP00000220003,9606.ENSP00000220496,9606.ENSP00000222002,9606.ENSP00000223836,9606.ENSP00000225614,9606.ENSP00000225927,9606.ENSP00000227868,9606.ENSP00000229795,9606.ENSP00000230431,9606.ENSP00000246337,9606.ENSP00000251968,9606.ENSP00000252486,9606.ENSP00000260508,9606.ENSP00000262290,9606.ENSP00000262545,9606.ENSP00000264498,…	GNPTG,MAPK12,APEX1,CSK,DNAJC17,SULT2A1,AK1,GALK1,NAGLU,PDHX,MAPK14,DNPH1,UROD,TSG101,APOE,KYAT3,LPO,PCSK2,FGF2,EGF,PCNP,SAT2,PGD,ACP1,UBASH3B,OLA1,CD109,FCN2,METAP1,ADH5,BDH2,RRM1,CTSF,GSTM1,POGLUT3,SWAP70,CPNE1,MET,SHMT1,GP1BA,EIF5A,NT5C2,PARK7,PRDX6,B3GLCT,RET,RAC1,GSTM3,AMY2B,FH,F5,GSTM4,AS3MT,MINPP1,AKR1A1,CTSA,PPCS,GNMT,TREM2,SVEP1,CLIC1,AKR1C4,AKR1C3,TEC,GGA1,ADH6,DNAJC30,ACY1,A4GALT,PCYOX1…
GO:0018916	Nitrobenzene metabolic process	3	4	1.97	0.0063	9606.ENSP00000311469,9606.ENSP00000354357,9606.ENSP00000358851	GSTM1,GSTM3,GSTM4
GO:0048731	System development	54	3867	0.24	0.0063	9606.ENSP00000053867,9606.ENSP00000219197,9606.ENSP00000220003,9606.ENSP00000225927,9606.ENSP00000229795,9606.ENSP00000247271,9606.ENSP00000252486,9606.ENSP00000255784,9606.ENSP00000262545,9606.ENSP00000264144,9606.ENSP00000264498,9606.ENSP00000264933,9606.ENSP00000265171,9606.ENSP00000267843,9606.ENSP00000273261,9606.ENSP00000274507,9606.ENSP00000287097,9606.ENSP00000291481,9606.ENSP00000295228,…	GRN,CBLN1,CSK,NAGLU,MAPK14,OMG,APOE,CCDC134,PCSK2,LAMC2,FGF2,PDCD6,EGF,FGF7,LRIG1,LECT2,CD109,HAPLN4,INHBB,CYB5D2,SWAP70,PLXND1,CPNE1,MET,GP1BA,ADAMTSL2,RET,RAC1,RSPO3,PLXNB2,SPINK5,PYY,GSTM3,ISLR2,SEMA4A,THBS3,TREM2,CLIC4,SVEP1,TNFRSF1B,AGRN,AKR1C3,CRLF1,DNAJC30,FGL1,PTPRJ,FJX1,CLMP,TGFBI,PTK7,PPIA,LDHA,PPT1,ATXN3
GO:0006575	Cellular modified amino acid metabolic process	9	178	0.8	0.0066	9606.ENSP00000222002,9606.ENSP00000311469,9606.ENSP00000318868,9606.ENSP00000340278,9606.ENSP00000354357,9606.ENSP00000358851,9606.ENSP00000361894,9606.ENSP00000364935,9606.ENSP00000387654	SULT2A1,GSTM1,SHMT1,PARK7,GSTM3,GSTM4,GNMT,CLIC1,PCYOX1
GO:0060429	Epithelium development	23	1069	0.43	0.0066	9606.ENSP00000230431,9606.ENSP00000251968,9606.ENSP00000264498,9606.ENSP00000265171,9606.ENSP00000267843,9606.ENSP00000287097,9606.ENSP00000296424,9606.ENSP00000317128,9606.ENSP00000317272,9606.ENSP00000346478,9606.ENSP00000347942,9606.ENSP00000349131,9606.ENSP00000352288,9606.ENSP00000352936,9606.ENSP00000353198,9606.ENSP00000354357,9606.ENSP00000363500,9606.ENSP00000369927,9606.ENSP00000376188,…	DNPH1,TSG101,FGF2,EGF,FGF7,CD109,BDH2,PLXND1,MET,ADAMTSL2,RET,RSPO3,PLXNB2,SPINK5,PYY,GSTM3,CLIC4,AKR1C3,CRLF1,ANXA4,MST1,PTK7,ACADVL
GO:0030155	Regulation of cell adhesion	19	784	0.48	0.0071	9606.ENSP00000220003,9606.ENSP00000229795,9606.ENSP00000233809,9606.ENSP00000264257,9606.ENSP00000284273,9606.ENSP00000313875,9606.ENSP00000315630,9606.ENSP00000317128,9606.ENSP00000329380,9606.ENSP00000347942,9606.ENSP00000348461,9606.ENSP00000352288,9606.ENSP00000352936,9606.ENSP00000356016,9606.ENSP00000381133,9606.ENSP00000400010,9606.ENSP00000416330,9606.ENSP00000487365,9606.ENSP00000496695	CSK,MAPK14,IGFBP2,IL1RL2,UBASH3B,CD46,SWAP70,PLXND1,GP1BA,RET,RAC1,PLXNB2,SPINK5,CR1,FGL1,PTPRJ,TGFBI,HSPH1,ATXN3
GO:0030334	Regulation of cell migration	21	927	0.45	0.0071	9606.ENSP00000053867,9606.ENSP00000216714,9606.ENSP00000223642,9606.ENSP00000252486,9606.ENSP00000264144,9606.ENSP00000264498,9606.ENSP00000264933,9606.ENSP00000265171,9606.ENSP00000267843,9606.ENSP00000315630,9606.ENSP00000317128,9606.ENSP00000317272,9606.ENSP00000329380,9606.ENSP00000347942,9606.ENSP00000348461,9606.ENSP00000352288,9606.ENSP00000357265,9606.ENSP00000362205,9606.ENSP00000363500,…	GRN,APEX1,C5,APOE,LAMC2,FGF2,PDCD6,EGF,FGF7,SWAP70,PLXND1,MET,GP1BA,RET,RAC1,PLXNB2,SEMA4A,TREM2,CLIC4,PTPRJ,MST1
GO:0034308	Primary alcohol metabolic process	7	99	0.94	0.0071	9606.ENSP00000222002,9606.ENSP00000296412,9606.ENSP00000340278,9606.ENSP00000361140,9606.ENSP00000369814,9606.ENSP00000369927,9606.ENSP00000378359	SULT2A1,ADH5,PARK7,AKR1A1,AKR1C4,AKR1C3,ADH6
GO:0048646	Anatomical structure formation involved in morphogenesis	21	938	0.44	0.0079	9606.ENSP00000064780,9606.ENSP00000219197,9606.ENSP00000229795,9606.ENSP00000252483,9606.ENSP00000255784,9606.ENSP00000264498,9606.ENSP00000264933,9606.ENSP00000265171,9606.ENSP00000287097,9606.ENSP00000317128,9606.ENSP00000347942,9606.ENSP00000349131,9606.ENSP00000352288,9606.ENSP00000357265,9606.ENSP00000357362,9606.ENSP00000363500,9606.ENSP00000376899,9606.ENSP00000400223,9606.ENSP00000416330,…	RELT,CBLN1,MAPK14,NECTIN2,CCDC134,FGF2,PDCD6,EGF,CD109,PLXND1,RET,RSPO3,PLXNB2,SEMA4A,THBS3,CLIC4,PTGFRN,FJX1,TGFBI,PTK7,FAM20A
GO:0061045	Negative regulation of wound healing	6	69	1.03	0.0087	9606.ENSP00000233156,9606.ENSP00000252486,9606.ENSP00000264498,9606.ENSP00000284273,9606.ENSP00000287097,9606.ENSP00000329380	TFPI,APOE,FGF2,UBASH3B,CD109,GP1BA
GO:0006163	Purine nucleotide metabolic process	13	403	0.6	0.0088	9606.ENSP00000222002,9606.ENSP00000223836,9606.ENSP00000225614,9606.ENSP00000227868,9606.ENSP00000230431,9606.ENSP00000284719,9606.ENSP00000339479,9606.ENSP00000361642,9606.ENSP00000378605,9606.ENSP00000414624,9606.ENSP00000445175,9606.ENSP00000466845,9606.ENSP00000493153	SULT2A1,AK1,GALK1,PDHX,DNPH1,OLA1,NT5C2,PPCS,DNAJC30,PRPSAP1,LDHA,GCDH,PPT1
GO:0071526	Semaphorin-plexin signaling pathway	5	41	1.18	0.0089	9606.ENSP00000317128,9606.ENSP00000317272,9606.ENSP00000348461,9606.ENSP00000352288,9606.ENSP00000357265	PLXND1,MET,RAC1,PLXNB2,SEMA4A
GO:0007166	Cell surface receptor signaling pathway	34	2040	0.31	0.01	9606.ENSP00000220003,9606.ENSP00000223642,9606.ENSP00000229795,9606.ENSP00000244519,9606.ENSP00000252229,9606.ENSP00000264257,9606.ENSP00000264498,9606.ENSP00000264933,9606.ENSP00000265171,9606.ENSP00000267843,9606.ENSP00000273047,9606.ENSP00000284273,9606.ENSP00000291744,9606.ENSP00000291759,9606.ENSP00000295228,9606.ENSP00000300289,9606.ENSP00000317128,9606.ENSP00000317272,9606.ENSP00000329380,…	CSK,C5,MAPK14,BTN3A3,MICB,IL1RL2,FGF2,PDCD6,EGF,FGF7,RAB5A,UBASH3B,FCN2,LILRA4,INHBB,PDIA3,PLXND1,MET,GP1BA,EIF5A,RET,RAC1,RSPO3,PLXNB2,CR1,SEMA4A,TREM2,SVEP1,TNFRSF1B,TEC,CRLF1,ANXA4,PTPRJ,PTK7
GO:0030162	Regulation of proteolysis	18	739	0.48	0.01	9606.ENSP00000053867,9606.ENSP00000215659,9606.ENSP00000223642,9606.ENSP00000233156,9606.ENSP00000252486,9606.ENSP00000264933,9606.ENSP00000265171,9606.ENSP00000269489,9606.ENSP00000287097,9606.ENSP00000311313,9606.ENSP00000340278,9606.ENSP00000347942,9606.ENSP00000352936,9606.ENSP00000356016,9606.ENSP00000362205,9606.ENSP00000365435,9606.ENSP00000416066,9606.ENSP00000496695	GRN,MAPK12,C5,TFPI,APOE,PDCD6,EGF,SERPINB13,CD109,CST6,PARK7,RET,SPINK5,CR1,TREM2,TNFRSF1B,SERPINA1,ATXN3
GO:0007155	Cell adhesion	21	965	0.43	0.0105	9606.ENSP00000219197,9606.ENSP00000247271,9606.ENSP00000252483,9606.ENSP00000264144,9606.ENSP00000270233,9606.ENSP00000284273,9606.ENSP00000291481,9606.ENSP00000296411,9606.ENSP00000329380,9606.ENSP00000345008,9606.ENSP00000347942,9606.ENSP00000348461,9606.ENSP00000352288,9606.ENSP00000357362,9606.ENSP00000363593,9606.ENSP00000364935,9606.ENSP00000378957,9606.ENSP00000416330,9606.ENSP00000418754,…	CBLN1,OMG,NECTIN2,LAMC2,BCAM,UBASH3B,HAPLN4,METAP1,GP1BA,FBLN5,RET,RAC1,PLXNB2,THBS3,SVEP1,CLIC1,MFAP4,TGFBI,PTK7,PPIA,SPON2
GO:0032501	Multicellular organismal process	77	6490	0.17	0.0105	9606.ENSP00000053867,9606.ENSP00000219197,9606.ENSP00000220003,9606.ENSP00000223642,9606.ENSP00000225927,9606.ENSP00000229795,9606.ENSP00000233156,9606.ENSP00000233809,9606.ENSP00000247271,9606.ENSP00000252483,9606.ENSP00000252486,9606.ENSP00000255784,9606.ENSP00000262290,9606.ENSP00000262545,9606.ENSP00000264144,9606.ENSP00000264498,9606.ENSP00000264933,9606.ENSP00000265171,9606.ENSP00000267843,…	GRN,CBLN1,CSK,C5,NAGLU,MAPK14,TFPI,IGFBP2,OMG,NECTIN2,APOE,CCDC134,LPO,PCSK2,LAMC2,FGF2,PDCD6,EGF,FGF7,RAB5A,LRIG1,LECT2,UBASH3B,CD109,HAPLN4,INHBB,METAP1,ADH5,CYB5D2,SWAP70,PLXND1,CPNE1,MET,GP1BA,PARK7,ADAMTSL2,RET,RAC1,RSPO3,PLXNB2,SPINK5,PYY,GSTM3,ISLR2,FH,F5,SEMA4A,THBS3,MINPP1,PPCS,TREM2,CLIC4,SVEP1,CLIC1,TNFRSF1B,AGRN,AKR1C3,CRLF1,CCDC50,DNAJC30,FGL1,CRYZ,PTPRJ,FJX1,CLMP,MST1,SERPINA1,TGFBI…
GO:0048585	Negative regulation of response to stimulus	29	1612	0.35	0.0105	9606.ENSP00000053867,9606.ENSP00000219197,9606.ENSP00000220003,9606.ENSP00000223642,9606.ENSP00000229795,9606.ENSP00000233156,9606.ENSP00000233809,9606.ENSP00000251968,9606.ENSP00000252229,9606.ENSP00000252486,9606.ENSP00000253354,9606.ENSP00000264498,9606.ENSP00000264933,9606.ENSP00000284273,9606.ENSP00000287097,9606.ENSP00000291759,9606.ENSP00000313875,9606.ENSP00000317257,9606.ENSP00000317272,…	GRN,CBLN1,CSK,C5,MAPK14,TFPI,IGFBP2,TSG101,MICB,APOE,BPIFB1,FGF2,PDCD6,UBASH3B,CD109,LILRA4,CD46,CPNE1,MET,GP1BA,PARK7,ADAMTSL2,SPINK5,CR1,SEMA4A,TREM2,TNFRSF1B,PTPRJ,PPIA
GO:0070527	Platelet aggregation	5	43	1.16	0.0105	9606.ENSP00000284273,9606.ENSP00000296411,9606.ENSP00000329380,9606.ENSP00000364935,9606.ENSP00000419425	UBASH3B,METAP1,GP1BA,CLIC1,PPIA
GO:1901615	Organic hydroxy compound metabolic process	14	478	0.56	0.0106	9606.ENSP00000222002,9606.ENSP00000225614,9606.ENSP00000252486,9606.ENSP00000264498,9606.ENSP00000296412,9606.ENSP00000340278,9606.ENSP00000361064,9606.ENSP00000361140,9606.ENSP00000369814,9606.ENSP00000369927,9606.ENSP00000378359,9606.ENSP00000417138,9606.ENSP00000445002,9606.ENSP00000445175	SULT2A1,GALK1,APOE,FGF2,ADH5,PARK7,MINPP1,AKR1A1,AKR1C4,AKR1C3,ADH6,PLTP,APOA5,LDHA
GO:0007275	Multicellular organism development	56	4209	0.22	0.0108	9606.ENSP00000053867,9606.ENSP00000219197,9606.ENSP00000220003,9606.ENSP00000223642,9606.ENSP00000225927,9606.ENSP00000229795,9606.ENSP00000247271,9606.ENSP00000252486,9606.ENSP00000255784,9606.ENSP00000262545,9606.ENSP00000264144,9606.ENSP00000264498,9606.ENSP00000264933,9606.ENSP00000265171,9606.ENSP00000267843,9606.ENSP00000273261,9606.ENSP00000274507,9606.ENSP00000287097,9606.ENSP00000291481,…	GRN,CBLN1,CSK,C5,NAGLU,MAPK14,OMG,APOE,CCDC134,PCSK2,LAMC2,FGF2,PDCD6,EGF,FGF7,LRIG1,LECT2,CD109,HAPLN4,INHBB,CYB5D2,SWAP70,PLXND1,CPNE1,MET,GP1BA,ADAMTSL2,RET,RAC1,RSPO3,PLXNB2,SPINK5,PYY,GSTM3,ISLR2,SEMA4A,THBS3,TREM2,CLIC4,SVEP1,TNFRSF1B,AGRN,AKR1C3,CRLF1,DNAJC30,FGL1,PTPRJ,FJX1,CLMP,MST1,TGFBI,PTK7,PPIA,LDHA,PPT1,ATXN3
GO:0044248	Cellular catabolic process	29	1620	0.35	0.0108	9606.ENSP00000216714,9606.ENSP00000222002,9606.ENSP00000230431,9606.ENSP00000246337,9606.ENSP00000251968,9606.ENSP00000260508,9606.ENSP00000262290,9606.ENSP00000265260,9606.ENSP00000270776,9606.ENSP00000296412,9606.ENSP00000296424,9606.ENSP00000311469,9606.ENSP00000318868,9606.ENSP00000339479,9606.ENSP00000340278,9606.ENSP00000342026,9606.ENSP00000354357,9606.ENSP00000358851,9606.ENSP00000361140,…	APEX1,SULT2A1,DNPH1,UROD,TSG101,KYAT3,LPO,PCNP,PGD,ADH5,BDH2,GSTM1,SHMT1,NT5C2,PARK7,PRDX6,GSTM3,GSTM4,AKR1A1,TREM2,AKR1C3,PCYOX1,CRYZ,ACADVL,APOA5,GCDH,PPT1,MANBA,ATXN3
GO:0051130	Positive regulation of cellular component organization	22	1049	0.41	0.0108	9606.ENSP00000053867,9606.ENSP00000219197,9606.ENSP00000229795,9606.ENSP00000251968,9606.ENSP00000252486,9606.ENSP00000265171,9606.ENSP00000315630,9606.ENSP00000317128,9606.ENSP00000317272,9606.ENSP00000336702,9606.ENSP00000340278,9606.ENSP00000347942,9606.ENSP00000348461,9606.ENSP00000352288,9606.ENSP00000355402,9606.ENSP00000357265,9606.ENSP00000362205,9606.ENSP00000368678,9606.ENSP00000400010,…	GRN,CBLN1,MAPK14,TSG101,APOE,EGF,SWAP70,PLXND1,MET,EIF5A,PARK7,RET,RAC1,PLXNB2,ISLR2,SEMA4A,TREM2,AGRN,PTPRJ,PTK7,APOA5,PPT1
GO:0051246	Regulation of protein metabolic process	40	2622	0.28	0.0111	9606.ENSP00000053867,9606.ENSP00000215659,9606.ENSP00000220003,9606.ENSP00000223642,9606.ENSP00000233156,9606.ENSP00000251968,9606.ENSP00000252486,9606.ENSP00000264498,9606.ENSP00000264933,9606.ENSP00000265171,9606.ENSP00000267843,9606.ENSP00000269489,9606.ENSP00000284273,9606.ENSP00000287097,9606.ENSP00000295228,9606.ENSP00000296411,9606.ENSP00000311313,9606.ENSP00000315630,9606.ENSP00000318868,…	GRN,MAPK12,CSK,C5,TFPI,TSG101,APOE,FGF2,PDCD6,EGF,FGF7,SERPINB13,UBASH3B,CD109,INHBB,METAP1,CST6,SWAP70,SHMT1,EIF5A,PARK7,RET,RAC1,PLXNB2,SPINK5,FH,CR1,CTSA,TREM2,TNFRSF1B,GGA1,CRLF1,PTPRJ,MST1,SERPINA1,PPIA,EIF1AD,GGA3,FAM20A,ATXN3
GO:0006805	Xenobiotic metabolic process	7	115	0.88	0.013	9606.ENSP00000222002,9606.ENSP00000262290,9606.ENSP00000311469,9606.ENSP00000354357,9606.ENSP00000358851,9606.ENSP00000358896,9606.ENSP00000399805	SULT2A1,LPO,GSTM1,GSTM3,GSTM4,AS3MT,CRYZ
GO:0002252	Immune effector process	12	375	0.6	0.0152	9606.ENSP00000053867,9606.ENSP00000223642,9606.ENSP00000244519,9606.ENSP00000244709,9606.ENSP00000291744,9606.ENSP00000313875,9606.ENSP00000315630,9606.ENSP00000356016,9606.ENSP00000357265,9606.ENSP00000362205,9606.ENSP00000378957,9606.ENSP00000483599	GRN,C5,BTN3A3,TREM1,FCN2,CD46,SWAP70,CR1,SEMA4A,TREM2,MFAP4,SPON2
GO:1901657	Glycosyl compound metabolic process	6	81	0.96	0.0154	9606.ENSP00000230431,9606.ENSP00000339479,9606.ENSP00000361140,9606.ENSP00000361894,9606.ENSP00000369814,9606.ENSP00000369927	DNPH1,NT5C2,AKR1A1,GNMT,AKR1C4,AKR1C3
GO:0050819	Negative regulation of coagulation	5	50	1.09	0.0167	9606.ENSP00000233156,9606.ENSP00000252486,9606.ENSP00000284273,9606.ENSP00000329380,9606.ENSP00000377833	TFPI,APOE,UBASH3B,GP1BA,ANXA4
GO:0051094	Positive regulation of developmental process	25	1332	0.37	0.0167	9606.ENSP00000053867,9606.ENSP00000215659,9606.ENSP00000219197,9606.ENSP00000223642,9606.ENSP00000229795,9606.ENSP00000252486,9606.ENSP00000264257,9606.ENSP00000264498,9606.ENSP00000264933,9606.ENSP00000265171,9606.ENSP00000301391,9606.ENSP00000313875,9606.ENSP00000317128,9606.ENSP00000317257,9606.ENSP00000347942,9606.ENSP00000348461,9606.ENSP00000352288,9606.ENSP00000355402,9606.ENSP00000356016,…	GRN,MAPK12,CBLN1,C5,MAPK14,APOE,IL1RL2,FGF2,PDCD6,EGF,CYB5D2,CD46,PLXND1,CPNE1,RET,RAC1,PLXNB2,ISLR2,CR1,SEMA4A,TREM2,CLIC1,TNFRSF1B,AGRN,MST1
GO:0042178	Xenobiotic catabolic process	4	25	1.3	0.0168	9606.ENSP00000311469,9606.ENSP00000354357,9606.ENSP00000358851,9606.ENSP00000399805	GSTM1,GSTM3,GSTM4,CRYZ
GO:0051240	Positive regulation of multicellular organismal process	27	1505	0.35	0.017	9606.ENSP00000053867,9606.ENSP00000219197,9606.ENSP00000223642,9606.ENSP00000229795,9606.ENSP00000252486,9606.ENSP00000264257,9606.ENSP00000264498,9606.ENSP00000264933,9606.ENSP00000265171,9606.ENSP00000295228,9606.ENSP00000313875,9606.ENSP00000317128,9606.ENSP00000340278,9606.ENSP00000347942,9606.ENSP00000352288,9606.ENSP00000354932,9606.ENSP00000355402,9606.ENSP00000355518,9606.ENSP00000356016,…	GRN,CBLN1,C5,MAPK14,APOE,IL1RL2,FGF2,PDCD6,EGF,INHBB,CD46,PLXND1,PARK7,RET,PLXNB2,TLR1,ISLR2,FH,CR1,SEMA4A,TREM2,TNFRSF1B,AGRN,PTPRJ,MST1,APOA5,SPON2
GO:0019748	Secondary metabolic process	5	51	1.08	0.0173	9606.ENSP00000296424,9606.ENSP00000358896,9606.ENSP00000361140,9606.ENSP00000369814,9606.ENSP00000369927	BDH2,AS3MT,AKR1A1,AKR1C4,AKR1C3
GO:0052547	Regulation of peptidase activity	13	446	0.56	0.0173	9606.ENSP00000053867,9606.ENSP00000215659,9606.ENSP00000223642,9606.ENSP00000233156,9606.ENSP00000264933,9606.ENSP00000269489,9606.ENSP00000287097,9606.ENSP00000311313,9606.ENSP00000340278,9606.ENSP00000347942,9606.ENSP00000352936,9606.ENSP00000356016,9606.ENSP00000416066	GRN,MAPK12,C5,TFPI,PDCD6,SERPINB13,CD109,CST6,PARK7,RET,SPINK5,CR1,SERPINA1
GO:0002253	Activation of immune response	10	271	0.66	0.0181	9606.ENSP00000220003,9606.ENSP00000223642,9606.ENSP00000244519,9606.ENSP00000252229,9606.ENSP00000291744,9606.ENSP00000313875,9606.ENSP00000356016,9606.ENSP00000370912,9606.ENSP00000378957,9606.ENSP00000400010	CSK,C5,BTN3A3,MICB,FCN2,CD46,CR1,TEC,MFAP4,PTPRJ
GO:0006807	Nitrogen compound metabolic process	77	6643	0.16	0.0181	9606.ENSP00000204679,9606.ENSP00000215659,9606.ENSP00000216714,9606.ENSP00000220003,9606.ENSP00000220496,9606.ENSP00000222002,9606.ENSP00000223836,9606.ENSP00000225614,9606.ENSP00000225927,9606.ENSP00000227868,9606.ENSP00000229795,9606.ENSP00000230431,9606.ENSP00000246337,9606.ENSP00000251968,9606.ENSP00000252486,9606.ENSP00000260508,9606.ENSP00000262545,9606.ENSP00000264498,9606.ENSP00000265171,…	GNPTG,MAPK12,APEX1,CSK,DNAJC17,SULT2A1,AK1,GALK1,NAGLU,PDHX,MAPK14,DNPH1,UROD,TSG101,APOE,KYAT3,PCSK2,FGF2,EGF,PCNP,SAT2,ACP1,UBASH3B,OLA1,CD109,FCN2,METAP1,ADH5,BDH2,RRM1,CTSF,GSTM1,POGLUT3,SWAP70,CPNE1,MET,SHMT1,GP1BA,EIF5A,NT5C2,PARK7,B3GLCT,RET,GSTM3,FH,F5,GSTM4,AKR1A1,CTSA,PPCS,GNMT,CLIC1,AKR1C4,AKR1C3,TEC,GGA1,DNAJC30,ACY1,A4GALT,PCYOX1,PTPRJ,AOC1,MST1,PRPSAP1,PTK7,PPIA,EIF1AD,GGA3,APOA5,LD…
GO:0009653	Anatomical structure morphogenesis	35	2229	0.29	0.0181	9606.ENSP00000064780,9606.ENSP00000219197,9606.ENSP00000225927,9606.ENSP00000229795,9606.ENSP00000252483,9606.ENSP00000252486,9606.ENSP00000255784,9606.ENSP00000264144,9606.ENSP00000264498,9606.ENSP00000264933,9606.ENSP00000265171,9606.ENSP00000267843,9606.ENSP00000273261,9606.ENSP00000287097,9606.ENSP00000311313,9606.ENSP00000317128,9606.ENSP00000317257,9606.ENSP00000317272,9606.ENSP00000329380,…	RELT,CBLN1,NAGLU,MAPK14,NECTIN2,APOE,CCDC134,LAMC2,FGF2,PDCD6,EGF,FGF7,LRIG1,CD109,CST6,PLXND1,CPNE1,MET,GP1BA,RET,RAC1,RSPO3,PLXNB2,SEMA4A,THBS3,CLIC4,SVEP1,AGRN,PTGFRN,FGL1,FJX1,MST1,TGFBI,PTK7,FAM20A
GO:0010594	Regulation of endothelial cell migration	8	169	0.77	0.0181	9606.ENSP00000053867,9606.ENSP00000252486,9606.ENSP00000264498,9606.ENSP00000264933,9606.ENSP00000265171,9606.ENSP00000317272,9606.ENSP00000348461,9606.ENSP00000357265	GRN,APOE,FGF2,PDCD6,EGF,MET,RAC1,SEMA4A
GO:0002684	Positive regulation of immune system process	19	874	0.43	0.0185	9606.ENSP00000220003,9606.ENSP00000223642,9606.ENSP00000233809,9606.ENSP00000244519,9606.ENSP00000252229,9606.ENSP00000252483,9606.ENSP00000264257,9606.ENSP00000291744,9606.ENSP00000313875,9606.ENSP00000315630,9606.ENSP00000340278,9606.ENSP00000348461,9606.ENSP00000356016,9606.ENSP00000362205,9606.ENSP00000370912,9606.ENSP00000378957,9606.ENSP00000400010,9606.ENSP00000483599,9606.ENSP00000487365	CSK,C5,IGFBP2,BTN3A3,MICB,NECTIN2,IL1RL2,FCN2,CD46,SWAP70,PARK7,RAC1,CR1,TREM2,TEC,MFAP4,PTPRJ,SPON2,HSPH1
GO:0044597	Daunorubicin metabolic process	3	9	1.62	0.0193	9606.ENSP00000361140,9606.ENSP00000369814,9606.ENSP00000369927	AKR1A1,AKR1C4,AKR1C3
GO:0050865	Regulation of cell activation	16	658	0.48	0.0193	9606.ENSP00000053867,9606.ENSP00000220003,9606.ENSP00000233809,9606.ENSP00000252483,9606.ENSP00000252486,9606.ENSP00000264257,9606.ENSP00000284273,9606.ENSP00000313875,9606.ENSP00000329380,9606.ENSP00000352936,9606.ENSP00000356016,9606.ENSP00000362205,9606.ENSP00000365435,9606.ENSP00000370912,9606.ENSP00000381133,9606.ENSP00000487365	GRN,CSK,IGFBP2,NECTIN2,APOE,IL1RL2,UBASH3B,CD46,GP1BA,SPINK5,CR1,TREM2,TNFRSF1B,TEC,FGL1,HSPH1
GO:0110095	Cellular detoxification of aldehyde	3	9	1.62	0.0193	9606.ENSP00000296412,9606.ENSP00000340278,9606.ENSP00000361140	ADH5,PARK7,AKR1A1
GO:0051248	Negative regulation of protein metabolic process	21	1038	0.4	0.0199	9606.ENSP00000223642,9606.ENSP00000233156,9606.ENSP00000251968,9606.ENSP00000252486,9606.ENSP00000269489,9606.ENSP00000284273,9606.ENSP00000287097,9606.ENSP00000295228,9606.ENSP00000311313,9606.ENSP00000315630,9606.ENSP00000318868,9606.ENSP00000340278,9606.ENSP00000352936,9606.ENSP00000355518,9606.ENSP00000356016,9606.ENSP00000361562,9606.ENSP00000362205,9606.ENSP00000400010,9606.ENSP00000416066,…	C5,TFPI,TSG101,APOE,SERPINB13,UBASH3B,CD109,INHBB,CST6,SWAP70,SHMT1,PARK7,SPINK5,FH,CR1,CTSA,TREM2,PTPRJ,SERPINA1,PPIA,GGA3
GO:0042060	Wound healing	11	336	0.61	0.02	9606.ENSP00000229795,9606.ENSP00000233156,9606.ENSP00000264498,9606.ENSP00000284273,9606.ENSP00000296411,9606.ENSP00000329380,9606.ENSP00000356771,9606.ENSP00000364935,9606.ENSP00000416066,9606.ENSP00000418754,9606.ENSP00000419425	MAPK14,TFPI,FGF2,UBASH3B,METAP1,GP1BA,F5,CLIC1,SERPINA1,PTK7,PPIA
GO:0001817	Regulation of cytokine production	17	739	0.45	0.0206	9606.ENSP00000220003,9606.ENSP00000223642,9606.ENSP00000229795,9606.ENSP00000244519,9606.ENSP00000264257,9606.ENSP00000291759,9606.ENSP00000295228,9606.ENSP00000313875,9606.ENSP00000340278,9606.ENSP00000348461,9606.ENSP00000354932,9606.ENSP00000356016,9606.ENSP00000362205,9606.ENSP00000365435,9606.ENSP00000377833,9606.ENSP00000400010,9606.ENSP00000483599	CSK,C5,MAPK14,BTN3A3,IL1RL2,LILRA4,INHBB,CD46,PARK7,RAC1,TLR1,CR1,TREM2,TNFRSF1B,ANXA4,PTPRJ,SPON2
GO:0042537	Benzene-containing compound metabolic process	4	28	1.25	0.0206	9606.ENSP00000260508,9606.ENSP00000311469,9606.ENSP00000354357,9606.ENSP00000358851	KYAT3,GSTM1,GSTM3,GSTM4
GO:0044237	Cellular metabolic process	76	6568	0.16	0.0206	9606.ENSP00000204679,9606.ENSP00000215659,9606.ENSP00000216714,9606.ENSP00000220003,9606.ENSP00000220496,9606.ENSP00000222002,9606.ENSP00000223836,9606.ENSP00000225614,9606.ENSP00000227868,9606.ENSP00000229795,9606.ENSP00000230431,9606.ENSP00000246337,9606.ENSP00000251968,9606.ENSP00000252486,9606.ENSP00000260508,9606.ENSP00000262290,9606.ENSP00000262545,9606.ENSP00000264498,9606.ENSP00000265171,…	GNPTG,MAPK12,APEX1,CSK,DNAJC17,SULT2A1,AK1,GALK1,PDHX,MAPK14,DNPH1,UROD,TSG101,APOE,KYAT3,LPO,PCSK2,FGF2,EGF,PCNP,SAT2,PGD,ACP1,UBASH3B,OLA1,CD109,ADH5,BDH2,RRM1,GSTM1,POGLUT3,SWAP70,MET,SHMT1,EIF5A,NT5C2,PARK7,PRDX6,B3GLCT,RET,GSTM3,FH,GSTM4,AS3MT,MINPP1,AKR1A1,PPCS,GNMT,TREM2,CLIC1,AKR1C4,AKR1C3,TEC,ADH6,DNAJC30,ACY1,A4GALT,PCYOX1,CRYZ,PTPRJ,AOC1,MST1,PRPSAP1,PLTP,PTK7,EIF1AD,ACADVL,APOA5,LDHA,…
GO:0035239	Tube morphogenesis	16	669	0.47	0.0211	9606.ENSP00000229795,9606.ENSP00000252486,9606.ENSP00000255784,9606.ENSP00000264498,9606.ENSP00000264933,9606.ENSP00000265171,9606.ENSP00000317128,9606.ENSP00000317272,9606.ENSP00000347942,9606.ENSP00000349131,9606.ENSP00000352288,9606.ENSP00000357265,9606.ENSP00000363500,9606.ENSP00000414287,9606.ENSP00000416330,9606.ENSP00000418754	MAPK14,APOE,CCDC134,FGF2,PDCD6,EGF,PLXND1,MET,RET,RSPO3,PLXNB2,SEMA4A,CLIC4,MST1,TGFBI,PTK7
GO:0009636	Response to toxic substance	9	229	0.69	0.0217	9606.ENSP00000252486,9606.ENSP00000262290,9606.ENSP00000295228,9606.ENSP00000296412,9606.ENSP00000311469,9606.ENSP00000340278,9606.ENSP00000342026,9606.ENSP00000354357,9606.ENSP00000361140	APOE,LPO,INHBB,ADH5,GSTM1,PARK7,PRDX6,GSTM3,AKR1A1
GO:0010632	Regulation of epithelial cell migration	9	229	0.69	0.0217	9606.ENSP00000053867,9606.ENSP00000252486,9606.ENSP00000264498,9606.ENSP00000264933,9606.ENSP00000265171,9606.ENSP00000267843,9606.ENSP00000317272,9606.ENSP00000348461,9606.ENSP00000357265	GRN,APOE,FGF2,PDCD6,EGF,FGF7,MET,RAC1,SEMA4A
GO:0030450	Regulation of complement activation, classical pathway	3	10	1.57	0.022	9606.ENSP00000313875,9606.ENSP00000356016,9606.ENSP00000362205	CD46,CR1,TREM2
GO:0044598	Doxorubicin metabolic process	3	10	1.57	0.022	9606.ENSP00000361140,9606.ENSP00000369814,9606.ENSP00000369927	AKR1A1,AKR1C4,AKR1C3
GO:0050790	Regulation of catalytic activity	36	2370	0.27	0.022	9606.ENSP00000053867,9606.ENSP00000215659,9606.ENSP00000220003,9606.ENSP00000223642,9606.ENSP00000229795,9606.ENSP00000233156,9606.ENSP00000251968,9606.ENSP00000252486,9606.ENSP00000264498,9606.ENSP00000264933,9606.ENSP00000265171,9606.ENSP00000269489,9606.ENSP00000284273,9606.ENSP00000287097,9606.ENSP00000311313,9606.ENSP00000315630,9606.ENSP00000317128,9606.ENSP00000317272,9606.ENSP00000340278,…	GRN,MAPK12,CSK,C5,MAPK14,TFPI,TSG101,APOE,FGF2,PDCD6,EGF,SERPINB13,UBASH3B,CD109,CST6,SWAP70,PLXND1,MET,PARK7,RET,PLXNB2,SPINK5,CR1,CTSA,TREM2,AGRN,GDI2,ANXA4,PTPRJ,MST1,PRPSAP1,SERPINA1,PPIA,APOA5,FAM20A,PPT1
GO:0006956	Complement activation	5	60	1.01	0.0266	9606.ENSP00000223642,9606.ENSP00000291744,9606.ENSP00000313875,9606.ENSP00000356016,9606.ENSP00000378957	C5,FCN2,CD46,CR1,MFAP4
GO:0044419	Biological process involved in interspecies interaction between organisms	26	1490	0.33	0.0266	9606.ENSP00000223642,9606.ENSP00000229795,9606.ENSP00000244709,9606.ENSP00000251968,9606.ENSP00000252483,9606.ENSP00000252486,9606.ENSP00000253354,9606.ENSP00000262290,9606.ENSP00000264257,9606.ENSP00000273047,9606.ENSP00000291744,9606.ENSP00000291759,9606.ENSP00000295228,9606.ENSP00000296412,9606.ENSP00000296877,9606.ENSP00000313875,9606.ENSP00000336702,9606.ENSP00000354932,9606.ENSP00000356016,…	C5,MAPK14,TREM1,TSG101,NECTIN2,APOE,BPIFB1,LPO,IL1RL2,RAB5A,FCN2,LILRA4,INHBB,ADH5,LEAP2,CD46,EIF5A,TLR1,CR1,CNPY3,TREM2,TNFRSF1B,MFAP4,PPIA,FAM20A,SPON2
GO:0002376	Immune system process	33	2121	0.29	0.0267	9606.ENSP00000053867,9606.ENSP00000220003,9606.ENSP00000223642,9606.ENSP00000229795,9606.ENSP00000244519,9606.ENSP00000244709,9606.ENSP00000252229,9606.ENSP00000253354,9606.ENSP00000255784,9606.ENSP00000263636,9606.ENSP00000264257,9606.ENSP00000287097,9606.ENSP00000291744,9606.ENSP00000291759,9606.ENSP00000296877,9606.ENSP00000300289,9606.ENSP00000310832,9606.ENSP00000313875,9606.ENSP00000315630,…	GRN,CSK,C5,MAPK14,BTN3A3,TREM1,MICB,BPIFB1,CCDC134,LY75,IL1RL2,CD109,FCN2,LILRA4,LEAP2,PDIA3,CTSF,CD46,SWAP70,GP1BA,RET,TLR1,CR1,SEMA4A,CNPY3,TREM2,TNFRSF1B,TEC,MFAP4,FGL1,PTPRJ,PPIA,SPON2
GO:0006955	Immune response	24	1321	0.35	0.0267	9606.ENSP00000053867,9606.ENSP00000220003,9606.ENSP00000223642,9606.ENSP00000244519,9606.ENSP00000244709,9606.ENSP00000252229,9606.ENSP00000253354,9606.ENSP00000263636,9606.ENSP00000264257,9606.ENSP00000291744,9606.ENSP00000291759,9606.ENSP00000296877,9606.ENSP00000313875,9606.ENSP00000315630,9606.ENSP00000354932,9606.ENSP00000356016,9606.ENSP00000357265,9606.ENSP00000361926,9606.ENSP00000362205,…	GRN,CSK,C5,BTN3A3,TREM1,MICB,BPIFB1,LY75,IL1RL2,FCN2,LILRA4,LEAP2,CD46,SWAP70,TLR1,CR1,SEMA4A,CNPY3,TREM2,TNFRSF1B,TEC,MFAP4,FGL1,SPON2
GO:0030168	Platelet activation	6	97	0.88	0.0267	9606.ENSP00000229795,9606.ENSP00000284273,9606.ENSP00000296411,9606.ENSP00000329380,9606.ENSP00000364935,9606.ENSP00000419425	MAPK14,UBASH3B,METAP1,GP1BA,CLIC1,PPIA
GO:0006749	Glutathione metabolic process	5	61	1.01	0.0268	9606.ENSP00000311469,9606.ENSP00000340278,9606.ENSP00000354357,9606.ENSP00000358851,9606.ENSP00000364935	GSTM1,PARK7,GSTM3,GSTM4,CLIC1
GO:0010951	Negative regulation of endopeptidase activity	9	240	0.67	0.0268	9606.ENSP00000223642,9606.ENSP00000233156,9606.ENSP00000269489,9606.ENSP00000287097,9606.ENSP00000311313,9606.ENSP00000340278,9606.ENSP00000352936,9606.ENSP00000356016,9606.ENSP00000416066	C5,TFPI,SERPINB13,CD109,CST6,PARK7,SPINK5,CR1,SERPINA1
GO:0019693	Ribose phosphate metabolic process	12	419	0.55	0.0269	9606.ENSP00000222002,9606.ENSP00000223836,9606.ENSP00000225614,9606.ENSP00000227868,9606.ENSP00000284719,9606.ENSP00000339479,9606.ENSP00000361642,9606.ENSP00000378605,9606.ENSP00000414624,9606.ENSP00000445175,9606.ENSP00000466845,9606.ENSP00000493153	SULT2A1,AK1,GALK1,PDHX,OLA1,NT5C2,PPCS,DNAJC30,PRPSAP1,LDHA,GCDH,PPT1
GO:0002250	Adaptive immune response	11	359	0.58	0.0283	9606.ENSP00000220003,9606.ENSP00000223642,9606.ENSP00000244519,9606.ENSP00000244709,9606.ENSP00000252229,9606.ENSP00000313875,9606.ENSP00000315630,9606.ENSP00000356016,9606.ENSP00000357265,9606.ENSP00000370912,9606.ENSP00000381133	CSK,C5,BTN3A3,TREM1,MICB,CD46,SWAP70,CR1,SEMA4A,TEC,FGL1
GO:0043086	Negative regulation of catalytic activity	17	771	0.44	0.0283	9606.ENSP00000220003,9606.ENSP00000223642,9606.ENSP00000233156,9606.ENSP00000251968,9606.ENSP00000252486,9606.ENSP00000269489,9606.ENSP00000284273,9606.ENSP00000287097,9606.ENSP00000311313,9606.ENSP00000340278,9606.ENSP00000352936,9606.ENSP00000356016,9606.ENSP00000377833,9606.ENSP00000400010,9606.ENSP00000414624,9606.ENSP00000416066,9606.ENSP00000419425	CSK,C5,TFPI,TSG101,APOE,SERPINB13,UBASH3B,CD109,CST6,PARK7,SPINK5,CR1,ANXA4,PTPRJ,PRPSAP1,SERPINA1,PPIA
GO:0045807	Positive regulation of endocytosis	6	99	0.88	0.0283	9606.ENSP00000251968,9606.ENSP00000252486,9606.ENSP00000265171,9606.ENSP00000362205,9606.ENSP00000445002,9606.ENSP00000493153	TSG101,APOE,EGF,TREM2,APOA5,PPT1
GO:0051336	Regulation of hydrolase activity	20	1011	0.39	0.0306	9606.ENSP00000053867,9606.ENSP00000215659,9606.ENSP00000223642,9606.ENSP00000233156,9606.ENSP00000264498,9606.ENSP00000264933,9606.ENSP00000269489,9606.ENSP00000287097,9606.ENSP00000311313,9606.ENSP00000317128,9606.ENSP00000317272,9606.ENSP00000340278,9606.ENSP00000347942,9606.ENSP00000352288,9606.ENSP00000352936,9606.ENSP00000356016,9606.ENSP00000368678,9606.ENSP00000416066,9606.ENSP00000445002,…	GRN,MAPK12,C5,TFPI,FGF2,PDCD6,SERPINB13,CD109,CST6,PLXND1,MET,PARK7,RET,PLXNB2,SPINK5,CR1,AGRN,SERPINA1,APOA5,PPT1
GO:0048583	Regulation of response to stimulus	51	3931	0.21	0.0307	9606.ENSP00000053867,9606.ENSP00000219197,9606.ENSP00000220003,9606.ENSP00000223642,9606.ENSP00000229795,9606.ENSP00000233156,9606.ENSP00000233809,9606.ENSP00000244519,9606.ENSP00000251968,9606.ENSP00000252229,9606.ENSP00000252483,9606.ENSP00000252486,9606.ENSP00000253354,9606.ENSP00000264257,9606.ENSP00000264498,9606.ENSP00000264933,9606.ENSP00000265171,9606.ENSP00000284273,9606.ENSP00000287097,…	GRN,CBLN1,CSK,C5,MAPK14,TFPI,IGFBP2,BTN3A3,TSG101,MICB,NECTIN2,APOE,BPIFB1,IL1RL2,FGF2,PDCD6,EGF,UBASH3B,CD109,FCN2,LILRA4,INHBB,PDIA3,CD46,SWAP70,CPNE1,MET,GP1BA,EIF5A,PARK7,FBLN5,ADAMTSL2,RET,RAC1,RSPO3,SPINK5,TLR1,FH,CR1,SEMA4A,TREM2,TNFRSF1B,AKR1C3,TEC,MFAP4,FGL1,PTPRJ,MST1,PTK7,PPIA,ATXN3
GO:0032374	Regulation of cholesterol transport	5	64	0.99	0.0311	9606.ENSP00000252486,9606.ENSP00000265171,9606.ENSP00000362205,9606.ENSP00000417138,9606.ENSP00000445002	APOE,EGF,TREM2,PLTP,APOA5
GO:0034394	Protein localization to cell surface	4	34	1.16	0.0314	9606.ENSP00000267843,9606.ENSP00000345008,9606.ENSP00000371175,9606.ENSP00000438085	FGF7,FBLN5,GGA1,GGA3
GO:0009987	Cellular process	138	14826	0.06	0.0344	9606.ENSP00000053867,9606.ENSP00000064780,9606.ENSP00000204679,9606.ENSP00000215659,9606.ENSP00000216714,9606.ENSP00000219197,9606.ENSP00000220003,9606.ENSP00000220478,9606.ENSP00000220496,9606.ENSP00000222002,9606.ENSP00000223642,9606.ENSP00000223836,9606.ENSP00000225614,9606.ENSP00000225927,9606.ENSP00000227868,9606.ENSP00000229795,9606.ENSP00000230431,9606.ENSP00000233156,9606.ENSP00000233809,…	GRN,RELT,GNPTG,MAPK12,APEX1,CBLN1,CSK,SCG3,DNAJC17,SULT2A1,C5,AK1,GALK1,NAGLU,PDHX,MAPK14,DNPH1,TFPI,IGFBP2,BTN3A3,TREM1,UROD,OMG,TSG101,MICB,NECTIN2,APOE,KYAT3,LPO,PCSK2,LAMC2,IL1RL2,FGF2,CP,PDCD6,EGF,PCNP,FGF7,SAT2,BCAM,PGD,ACP1,RAB5A,UBASH3B,OLA1,CD109,HAPLN4,FCN2,LILRA4,INHBB,METAP1,ADH5,BDH2,PDIA3,RRM1,CYB5D2,GSTM1,POGLUT3,SWAP70,PLXND1,CPNE1,MET,SHMT1,GP1BA,EIF5A,NT5C2,PARK7,PRDX6,B3GLCT,FB…
GO:0050778	Positive regulation of immune response	13	502	0.51	0.0344	9606.ENSP00000220003,9606.ENSP00000223642,9606.ENSP00000244519,9606.ENSP00000252229,9606.ENSP00000252483,9606.ENSP00000291744,9606.ENSP00000313875,9606.ENSP00000340278,9606.ENSP00000356016,9606.ENSP00000362205,9606.ENSP00000370912,9606.ENSP00000378957,9606.ENSP00000400010	CSK,C5,BTN3A3,MICB,NECTIN2,FCN2,CD46,PARK7,CR1,TREM2,TEC,MFAP4,PTPRJ
GO:0050878	Regulation of body fluid levels	11	371	0.57	0.0344	9606.ENSP00000229795,9606.ENSP00000233156,9606.ENSP00000252486,9606.ENSP00000284273,9606.ENSP00000296411,9606.ENSP00000317272,9606.ENSP00000329380,9606.ENSP00000356771,9606.ENSP00000364935,9606.ENSP00000416066,9606.ENSP00000419425	MAPK14,TFPI,APOE,UBASH3B,METAP1,MET,GP1BA,F5,CLIC1,SERPINA1,PPIA
GO:0010634	Positive regulation of epithelial cell migration	7	150	0.76	0.0352	9606.ENSP00000053867,9606.ENSP00000264498,9606.ENSP00000264933,9606.ENSP00000265171,9606.ENSP00000267843,9606.ENSP00000317272,9606.ENSP00000348461	GRN,FGF2,PDCD6,EGF,FGF7,MET,RAC1
GO:0051239	Regulation of multicellular organismal process	39	2749	0.24	0.0359	9606.ENSP00000053867,9606.ENSP00000219197,9606.ENSP00000220003,9606.ENSP00000223642,9606.ENSP00000229795,9606.ENSP00000233156,9606.ENSP00000244519,9606.ENSP00000252486,9606.ENSP00000264257,9606.ENSP00000264498,9606.ENSP00000264933,9606.ENSP00000265171,9606.ENSP00000267843,9606.ENSP00000284273,9606.ENSP00000287097,9606.ENSP00000291759,9606.ENSP00000295228,9606.ENSP00000313875,9606.ENSP00000317128,…	GRN,CBLN1,CSK,C5,MAPK14,TFPI,BTN3A3,APOE,IL1RL2,FGF2,PDCD6,EGF,FGF7,UBASH3B,CD109,LILRA4,INHBB,CD46,PLXND1,MET,GP1BA,PARK7,RET,RAC1,PLXNB2,SPINK5,TLR1,ISLR2,FH,CR1,SEMA4A,TREM2,TNFRSF1B,AGRN,ANXA4,PTPRJ,MST1,APOA5,SPON2
GO:0010595	Positive regulation of endothelial cell migration	6	107	0.84	0.0375	9606.ENSP00000053867,9606.ENSP00000264498,9606.ENSP00000264933,9606.ENSP00000265171,9606.ENSP00000317272,9606.ENSP00000348461	GRN,FGF2,PDCD6,EGF,MET,RAC1
GO:0044403	Biological process involved in symbiotic interaction	9	257	0.64	0.0375	9606.ENSP00000244709,9606.ENSP00000251968,9606.ENSP00000252483,9606.ENSP00000252486,9606.ENSP00000273047,9606.ENSP00000295228,9606.ENSP00000313875,9606.ENSP00000356016,9606.ENSP00000419425	TREM1,TSG101,NECTIN2,APOE,RAB5A,INHBB,CD46,CR1,PPIA
GO:0072329	Monocarboxylic acid catabolic process	6	107	0.84	0.0375	9606.ENSP00000222002,9606.ENSP00000270776,9606.ENSP00000296424,9606.ENSP00000361140,9606.ENSP00000438689,9606.ENSP00000466845	SULT2A1,PGD,BDH2,AKR1A1,ACADVL,GCDH
GO:0150079	Negative regulation of neuroinflammatory response	3	14	1.42	0.0386	9606.ENSP00000053867,9606.ENSP00000362205,9606.ENSP00000365435	GRN,TREM2,TNFRSF1B
GO:0007399	Nervous system development	33	2188	0.27	0.0387	9606.ENSP00000053867,9606.ENSP00000219197,9606.ENSP00000220003,9606.ENSP00000225927,9606.ENSP00000247271,9606.ENSP00000252486,9606.ENSP00000255784,9606.ENSP00000262545,9606.ENSP00000264144,9606.ENSP00000264498,9606.ENSP00000265171,9606.ENSP00000273261,9606.ENSP00000291481,9606.ENSP00000295228,9606.ENSP00000301391,9606.ENSP00000317128,9606.ENSP00000317257,9606.ENSP00000317272,9606.ENSP00000347942,…	GRN,CBLN1,CSK,NAGLU,OMG,APOE,CCDC134,PCSK2,LAMC2,FGF2,EGF,LRIG1,HAPLN4,INHBB,CYB5D2,PLXND1,CPNE1,MET,RET,RAC1,PLXNB2,SPINK5,GSTM3,ISLR2,SEMA4A,TREM2,AGRN,DNAJC30,PTK7,PPIA,LDHA,PPT1,ATXN3
GO:0010874	Regulation of cholesterol efflux	4	37	1.13	0.0387	9606.ENSP00000252486,9606.ENSP00000265171,9606.ENSP00000362205,9606.ENSP00000417138	APOE,EGF,TREM2,PLTP
GO:0008544	Epidermis development	10	320	0.59	0.0403	9606.ENSP00000251968,9606.ENSP00000264144,9606.ENSP00000264498,9606.ENSP00000267843,9606.ENSP00000287097,9606.ENSP00000311313,9606.ENSP00000352936,9606.ENSP00000363500,9606.ENSP00000363593,9606.ENSP00000369927	TSG101,LAMC2,FGF2,FGF7,CD109,CST6,SPINK5,CLIC4,SVEP1,AKR1C3
GO:0043603	Cellular amide metabolic process	17	810	0.42	0.0417	9606.ENSP00000227868,9606.ENSP00000262545,9606.ENSP00000296424,9606.ENSP00000311469,9606.ENSP00000318868,9606.ENSP00000336702,9606.ENSP00000339479,9606.ENSP00000340278,9606.ENSP00000354357,9606.ENSP00000355518,9606.ENSP00000358851,9606.ENSP00000361642,9606.ENSP00000364935,9606.ENSP00000434056,9606.ENSP00000466845,9606.ENSP00000472847,9606.ENSP00000493153	PDHX,PCSK2,BDH2,GSTM1,SHMT1,EIF5A,NT5C2,PARK7,GSTM3,FH,GSTM4,PPCS,CLIC1,EIF1AD,GCDH,SARS2,PPT1
GO:0030100	Regulation of endocytosis	8	209	0.68	0.0435	9606.ENSP00000251968,9606.ENSP00000252486,9606.ENSP00000265171,9606.ENSP00000273047,9606.ENSP00000348461,9606.ENSP00000362205,9606.ENSP00000445002,9606.ENSP00000493153	TSG101,APOE,EGF,RAB5A,RAC1,TREM2,APOA5,PPT1
GO:0001525	Angiogenesis	10	325	0.58	0.044	9606.ENSP00000229795,9606.ENSP00000255784,9606.ENSP00000264498,9606.ENSP00000264933,9606.ENSP00000265171,9606.ENSP00000317128,9606.ENSP00000349131,9606.ENSP00000357265,9606.ENSP00000363500,9606.ENSP00000416330	MAPK14,CCDC134,FGF2,PDCD6,EGF,PLXND1,RSPO3,SEMA4A,CLIC4,TGFBI
GO:0046185	Aldehyde catabolic process	3	15	1.39	0.044	9606.ENSP00000296412,9606.ENSP00000340278,9606.ENSP00000361140	ADH5,PARK7,AKR1A1
GO:1901137	Carbohydrate derivative biosynthetic process	14	593	0.47	0.0441	9606.ENSP00000223836,9606.ENSP00000227868,9606.ENSP00000300738,9606.ENSP00000315386,9606.ENSP00000318868,9606.ENSP00000343002,9606.ENSP00000361140,9606.ENSP00000361642,9606.ENSP00000378605,9606.ENSP00000384794,9606.ENSP00000414624,9606.ENSP00000466845,9606.ENSP00000483018,9606.ENSP00000493153	AK1,PDHX,RRM1,POGLUT3,SHMT1,B3GLCT,AKR1A1,PPCS,DNAJC30,A4GALT,PRPSAP1,GCDH,ABO,PPT1
GO:0009150	Purine ribonucleotide metabolic process	11	390	0.54	0.0452	9606.ENSP00000222002,9606.ENSP00000223836,9606.ENSP00000225614,9606.ENSP00000227868,9606.ENSP00000284719,9606.ENSP00000339479,9606.ENSP00000361642,9606.ENSP00000378605,9606.ENSP00000445175,9606.ENSP00000466845,9606.ENSP00000493153	SULT2A1,AK1,GALK1,PDHX,OLA1,NT5C2,PPCS,DNAJC30,LDHA,GCDH,PPT1
GO:0006959	Humoral immune response	9	268	0.62	0.0456	9606.ENSP00000223642,9606.ENSP00000244709,9606.ENSP00000291744,9606.ENSP00000296877,9606.ENSP00000313875,9606.ENSP00000356016,9606.ENSP00000362205,9606.ENSP00000378957,9606.ENSP00000483599	C5,TREM1,FCN2,LEAP2,CD46,CR1,TREM2,MFAP4,SPON2
GO:0001944	Vasculature development	13	527	0.49	0.0468	9606.ENSP00000229795,9606.ENSP00000252486,9606.ENSP00000255784,9606.ENSP00000264498,9606.ENSP00000264933,9606.ENSP00000265171,9606.ENSP00000317128,9606.ENSP00000349131,9606.ENSP00000357265,9606.ENSP00000363500,9606.ENSP00000363593,9606.ENSP00000416330,9606.ENSP00000418754	MAPK14,APOE,CCDC134,FGF2,PDCD6,EGF,PLXND1,RSPO3,SEMA4A,CLIC4,SVEP1,TGFBI,PTK7
GO:0062012	Regulation of small molecule metabolic process	10	330	0.57	0.0468	9606.ENSP00000252486,9606.ENSP00000340278,9606.ENSP00000355518,9606.ENSP00000361894,9606.ENSP00000362205,9606.ENSP00000369927,9606.ENSP00000378605,9606.ENSP00000414287,9606.ENSP00000438689,9606.ENSP00000445002	APOE,PARK7,FH,GNMT,TREM2,AKR1C3,DNAJC30,MST1,ACADVL,APOA5
GO:0071616	acyl-CoA biosynthetic process	4	40	1.09	0.0468	9606.ENSP00000227868,9606.ENSP00000361642,9606.ENSP00000466845,9606.ENSP00000493153	PDHX,PPCS,GCDH,PPT1
GO:0048584	Positive regulation of response to stimulus	32	2131	0.27	0.0469	9606.ENSP00000053867,9606.ENSP00000220003,9606.ENSP00000223642,9606.ENSP00000244519,9606.ENSP00000252229,9606.ENSP00000252483,9606.ENSP00000252486,9606.ENSP00000264498,9606.ENSP00000265171,9606.ENSP00000291744,9606.ENSP00000295228,9606.ENSP00000300289,9606.ENSP00000313875,9606.ENSP00000315630,9606.ENSP00000317257,9606.ENSP00000317272,9606.ENSP00000336702,9606.ENSP00000340278,9606.ENSP00000347942,…	GRN,CSK,C5,BTN3A3,MICB,NECTIN2,APOE,FGF2,EGF,FCN2,INHBB,PDIA3,CD46,SWAP70,CPNE1,MET,EIF5A,PARK7,RET,RAC1,RSPO3,TLR1,FH,CR1,TREM2,AKR1C3,TEC,MFAP4,PTPRJ,PTK7,PPIA,ATXN3
GO:0051716	Cellular response to stimulus	72	6357	0.15	0.0469	9606.ENSP00000053867,9606.ENSP00000215659,9606.ENSP00000216714,9606.ENSP00000220003,9606.ENSP00000222002,9606.ENSP00000223642,9606.ENSP00000229795,9606.ENSP00000233156,9606.ENSP00000233809,9606.ENSP00000244519,9606.ENSP00000244709,9606.ENSP00000247271,9606.ENSP00000252229,9606.ENSP00000252486,9606.ENSP00000262290,9606.ENSP00000264257,9606.ENSP00000264498,9606.ENSP00000264933,9606.ENSP00000265171,…	GRN,MAPK12,APEX1,CSK,SULT2A1,C5,MAPK14,TFPI,IGFBP2,BTN3A3,TREM1,OMG,MICB,APOE,LPO,IL1RL2,FGF2,PDCD6,EGF,FGF7,BCAM,RAB5A,UBASH3B,FCN2,LILRA4,INHBB,ADH5,PDIA3,RRM1,GSTM1,PLXND1,CPNE1,MET,SHMT1,GP1BA,EIF5A,PARK7,PRDX6,RET,RAC1,RSPO3,PLXNB2,PYY,GSTM3,TLR1,FH,CR1,SEMA4A,GSTM4,AS3MT,AKR1A1,TREM2,CLIC4,SVEP1,CLIC1,TNFRSF1B,AGRN,GDI2,AKR1C4,AKR1C3,TEC,CRLF1,ANXA4,MFAP4,CRYZ,PTPRJ,AOC1,MST1,PTK7,PPIA,SPON…
GO:0061138	Morphogenesis of a branching epithelium	7	162	0.73	0.0469	9606.ENSP00000264498,9606.ENSP00000265171,9606.ENSP00000267843,9606.ENSP00000317128,9606.ENSP00000317272,9606.ENSP00000349131,9606.ENSP00000363500	FGF2,EGF,FGF7,PLXND1,MET,RSPO3,CLIC4
GO:0072522	Purine-containing compound biosynthetic process	8	215	0.66	0.0469	9606.ENSP00000223836,9606.ENSP00000227868,9606.ENSP00000318868,9606.ENSP00000361642,9606.ENSP00000378605,9606.ENSP00000414624,9606.ENSP00000466845,9606.ENSP00000493153	AK1,PDHX,SHMT1,PPCS,DNAJC30,PRPSAP1,GCDH,PPT1
GO:1903034	Regulation of response to wounding	7	162	0.73	0.0469	9606.ENSP00000053867,9606.ENSP00000233156,9606.ENSP00000252486,9606.ENSP00000264498,9606.ENSP00000284273,9606.ENSP00000287097,9606.ENSP00000329380	GRN,TFPI,APOE,FGF2,UBASH3B,CD109,GP1BA

[truncated: 18 more sheets: Table S10, Table S11, Table S12, Table S13, Table S14, Table S15, Table S16, Table S17, Table S18, Table S19, Table S20, Table S21, Table S22, Table S23, Table S24, Table S25, Table S26, Table S27]
